# Supplementary material for: Caveolae-Mediated Sensing of Nanoporous Cues in Fibroblasts Reprogramming During Wound Healing
Source: Research Square preprint supplement (doi:10.21203/rs.3.rs-5955293/v1), 2025-02-19
Supplement: Supplementary file 1 [file bc61772cda06908295fbd589.xlsx]

## Sheet:  list for JASPAR, DNA pull down
The whole list for JASPAR (Mus; 7), and DNA-pull down proteins (21080).
DNA pull down symbols（Mus）(2216)	JASPAR(Mus) (7)
Rbfox2	Gata1
Parva	Arnt
Mcat	En1
Akap1	Runx1
Acadm	CREB1
Rprd1b	Pax5
Etfa	Mecom
Fxr1
Ints1
Slc39a7
Rpl10a
Rpl7a
Vps4b
Ugdh
Slc25a12
Poldip3
Srp68
Naca
Cdsn
Pnkp
Ubxn7
Acot13
Khdc4
Setd1a
Paics
Ndufs2
Casp3
Plrg1
Slc25a10
Ssbp1
Psma2
Hspa5
Pdcd11
Rexo2
Rab10
Smpd4
Anp32b
Mix23
Thoc1
Usp5
Vcl
Trim28
Myo1b
Gpx4
Cobll1
Rrp12
Epb41l3
Nhlrc2
Ddx39b
Pdia6
Cab39
Srfbp1
P4hb
Septin5
Rexo4
Top2a
Mcm5
Vbp1
Cul4a
Anxa3
Slc25a24
Bzw2
Cers2
Dars1
Ddx42
Hint1
Emd
Crnkl1
Champ1
Cnn2
Soat2
Tead3
Actbl2
Yars1
Camta1
Srsf7
Atad1
Rps21
Akr1a1
Fkbp10
Rtcb
Sgo2
Cox6a1
Emc7
Srrt
Wdr77
Mrps15
Pik3r5
Atp13a1
Dnm1
Usp10
Prpf38a
Fanci
Rab1A
Gart
Manf
Tnpo1
Mcu
Fkbp2
Mpc2
Emc8
Iqgap1
Anxa6
Eif2b2
Map4
Mia3
Ints6
Ybx3
Utp20
Mettl3
Fnta
Ctr9
Zfp28
Rcc1
Psmd11
Inf2
Arhgdib
Ctsb
Pabpc1
Hsd17b10
Zfp36l1
Cox4i1
Hsp90aa1
Rbm14
Cdv3
Ints12
Celf2
Nhp2
Sarnp
Ldah
Ncbp3
Sart1
Ptbp2
Lrrc47
Smchd1
Thrap3
Suclg1
Atp6v0c
Ddah2
Rhoa
Pcbp2
Abi1
Hgs
Prpf4b
Impact
Rdx
Nnt
Ssb
Mnat1
Mcm3
Golph3
Acin1
Arid2
Xrn2
Dhcr24
Cops2
Tmem214
Eno1
Dync2h1
Naa10
Rfc4
Snrnp40
Mtch2
Scd3
Srp9
Nup155
Grpel1
Arf4
Hmmr
Map2k3
Nxt2
Pnpla6
Glud1
Sumo1
Rpl34
Zc3hav1
Virma
Sod2
Ppib
Mat2a
Yy1
Lig1
Pgk1
Pdlim2
Prpf19
Crabp1
Chchd6
Ddx50
Uap1l1
Kif20b
Strap
Lsg1
Srprb
Anxa5
Guk1
Atxn10
Scfd1
Reep5
Limd2
Cmtm7
Tfip11
Cops3
Rps27l
Chaf1b
Smarcc1
Mprip
Erlin2
Ubap2
Sec31a
Rbm26
Clip1
Mtx1
Arf3
Snrpa1
Gpd2
Phgdh
Thy1
Tagln
Fkbp8
Vps29
Sdhb
Umps
Hacd2
Emp2
Rpl39
Fkbp3
Mecom
Bcap31
Slc25a4
Wdr1
Dek
Pes1
Tpt1
Lap3
Plaur
Elob
Metap2
Aatf
Ncapg2
Khsrp
Sfpq
Adnp
Glo1
Dnajc10
Dhrs7b
Raly
Nxf1
Dazap1
Mrps36
Dhrs1
Arpc3
Dync1h1
Gas2
Uqcr10
Prpf31
Dnm2
Mgst3
Gaa
Sae1
Eef2
RTRAF
Mbnl2
Gps1
Prpf6
Anapc2
Ccn1
Rbm25
Adrm1
Pcyt1a
Uba3
Rpsa
Ap3m1
Txndc17
Mpdu1
Tubb2a
Sephs1
Slc3a2
Rbm22
Soat1
Atp6v1h
Dstn
P3h1
Cyc1
Bri3bp
Psmd8
Xpo1
Dlgap5
Nsdhl
Snx9
Vcp
Ap1b1
Sipa1l3
Mia2
Lemd2
Eif3a
Atp5pb
Snrnp200
Lrpap1
Spr
Rad21
Dip2a
Brd4
Anxa7
Msn
Tlk2
Ywhah
Dpysl2
Zc3h15
Sgta
Dnajc9
Sub1
Cyp51a1
Esyt1
Glrx3
Upf1
Btf3l4
Prkcsh
Kif2c
Rhot1
Chmp4b
Rrp1b
Eif3g
Pbrm1
Fth1
H2az1
Snrpd3
Rsl24d1
Frmpd4
Actr10
S100a4
Ppp1cc
Nras
Arid3b
Mtco2
Kpna2
Dcps
Hmgcs1
Asb4
Runx1
Atxn7l3b
Hsph1
Atp1a1
Kif5b
Eml4
Krt71
Calr
Ncbp2
Stt3a
H3-5
Atp5pd
Slc37a1
Psma7
Ppm1g
Eci2
Anxa11
Mrpl55
Slu7
Cnot9
Pdha1
Rsu1
Ralb
Nptn
Ywhaq
Eif2b1
Sod1
Mrpl22
Qki
Luc7l
Rras2
Eef1g
Csnk2a1
Lasp1
Pdlim1
Ptk7
Ebp
Wbp4
Ssrp1
Snrpb2
Vps25
Clta
Mrps17
Sf3a1
Dap3
Sgpl1
Wiz
Pa2g4
Lss
Atl3
Cep131
Tex10
Tmed5
Snd1
Polr1g
Tpi1
Nip7
Dbi
Hsd17b4
Sec61a1
Taldo1
Gcsh
Racgap1
Comt
Dnajc8
Rpa1
Psmd12
Ano6
Fus
Supt4h1a
Gstm1
Stat3
Sycp1
Nrdc
Cltc
Timm13
Nmt2
Cul3
Commd8
Pycr1
Ddx41
Afg3l2
Lamtor3
Nup93
Hspa4
Prpf8
Ube2d3
Ube2m
Rab11b
Ppid
Fam98b
Capza1
Actl6a
Gfus
Tmem160
Rpl5
Pmpcb
Nme2
Tbl1xr1
Mogs
Psme1
Pcyox1
Eif4e
Phf5a
Rtn4
Chchd3
Timm9
Ezr
Eif3b
Tnpo3
Tjp1
Flot2
Tagln2
Psma4
Gsto1
Snap23
Stxbp1
Prdx4
Sec13
Cirbp
Ddx46
Znf706
Rab5c
Cryab
Slc25a11
Abcf1
Pycr2
Nckap1
Ruvbl1
Dnajb6
Adi1
Picalm
Cavin3
Cyfip1
Exosc9
Eif3f
Xdh
Ylpm1
Elof1
Map2k1
Ube2k
Eif3i
Ap3b1
Rad50
Prdx5
Atp6v1b2
Dsc1
Cd109
Acaca
Msi2
Ssu72
Isg20l2
Noc3l
Mrpl53
Sacm1l
Cfdp1
Gtf2e2
Rps20
Eif4g2
Surf4
Cask
Hdgf
Rbm39
Hmgb1
Safb
Esd
Rps29
Emc2
Nup188
Stambpl1
Drg1
Lxn
Micu1
Cnot8
Rps5
Nr2f2
Dars2
Plod3
Cavin2
Aldh2
Eed
Tpp2
Mrps27
Add1
Gorasp2
Nop16
Poglut2
Rpf2
Denr
Gatad2a
Col4a3
Vps35
Surf6
Nucb2
Atp6v1a
Cdk2ap2
Eif1
Znf207
Zfhx3
Bax
Nle1
Lsm5
Gak
Dag1
Ubr2
Nucb1
Ckap5
Dnajb12
Btn2a2
Bsg
Wdr5
Eif2b5
Snrpd1
Mtpn
Sntb1
Pals2
Slit3
Paxbp1
Rai14
Mrc2
Ccar2
Srm
Snrnp70
Farp1
Mfge8
Snrpd2
Prpf38b
Rps13
Vapb
Lin54
Smurf1
Tpr
Vdac1
Epb41l2
Blvrb
Ndufb11
Csnk2b
Hspa14
Phb1
Dnaja1
Uba52
Cybc1
Cul4b
Slc25a13
Slc2a1
Znf652
Glg1
Hip1r
Tars1
Prc1
Tma7
Rab14
Gstz1
Sp1
Yes1
Lonp1
Cops4
Tsg101
Zcchc8
Ykt6
Cnot11
Rbm8a
Stip1
Hm13
Dhx15
Srrm2
Ik
Ap2m1
Nup62
Plaa
Hnrnpul2
Idh1
Pafah1b1
Mmp14
Snrpc
Fam111a
Cdc42bpb
P4ha2
Ago4
Paf1
Emc10
Plcb3
Snrpe
Adss2
Mrpl49
Itsn1
Taok1
Ergic1
Dr1
Cul1
Cbfb
Lsm6
Mgat1
Ppa2
Mcm4
Peak1
Nemf
Pgd
Eif4b
Dimt1
Ewsr1
Atp5pf
Stoml2
Sf3b5
Ddx56
Pfas
Acsf2
Slc12a4
Eea1
Fam98a
Hdlbp
Sap30bp
Nap1l1
Tomm40
Nedd4
Ndufa6
Enah
Chmp3
Map4k4
Arhgdia
Thbs1
Atp1b3
Immt
Eif4e2
Mob1b
Mif
Aqr
Cdk1
Sec62
Rae1
Ddah1
Got1
Ndufb10
Gfm1
Plscr3
Septin8
Elp1
Hk2
Eps15l1
Grb2
Nfyc
Fkbp1a
Rpl22
Numa1
Rpl12
Zmpste24
Cpsf7
Rab1b
Gtf2b
Krtcap2
Eloc
Tmx4
Ddx1
Rbbp6
Apoh
Dpy30
Tmed9
Hadha
Ikbip
Rbm3
Tmpo
Spcs3
Ptpn2
Pcna
Cdca7l
Spcs2
Ermp1
Smarca4
Ubtf
Kif4
Smarce1
Sun2
Gtf2f1
Parl
Hexim1
Sympk
Pebp1
Ero1a
Bclaf1
Hadhb
Lims1
Twf1
Acmsd
Anp32e
Magoh
Cdca5
Fabp5
Fkbp5
Rbms2
Cds2
Snrpg
Mrpl10
Ncapd2
Clptm1
Tnrc6b
Gpi
Ment
Atp5mk
Smap
Mcm2
Sptbn1
Znf638
Cpsf3
Cad
Polr1a
Nudc
Gmds
Ipo7
Pgam5
Rnh1
Tbl2
Uqcrq
Scamp3
Nol12
Jun
G3bp2
Vamp8
Rpl10
Ndufs1
Tln2
Ncstn
Ppic
Rrs1
Mrps9
Kifc1
Actr1a
Vps36
Arhgef2
Akap8l
Psma5
Naa35
Ptpn23
Arcn1
Tbcb
Kif2a
Chd8
Dysf
Dhrs4
Myo5a
Eif3d
Rbpj
Atp5po
Pcgf2
Cfap70
Syne2
Pcm1
Mrps11
Nipsnap3b
Bckdk
Trim33
H1-1
Prpf3
Csrp1
Myl12b
Gar1
Prpf4
Msh2
Cpne3
Flnb
Clint1
Stk24
Ints7
Cnpy2
Aars1
Dlg1
Acads
Rer1
Iws1
Cdc73
Prkar2b
Arf6
Tmed10
Znf787
Map1lc3a
Cdc40
Yipf5
Mrps35
Ddx52
Gls
Ppme1
Map1a
Lsm4
Mapre1
Hdgfl3
Crebbp
Ddx18
Phb2
Gstp1
Tomm34
Rrm2
Ier3ip1
Spats2
Snrpa
Ppp1r12a
Psme2
Angpt1
Fhl3
Palld
Nup107
Rab2a
Cherp
Fasn
Slc16a2
Ncln
Tmem14c
Vps26a
Mrps21
U2surp
Ahsa1
Spag7
Ctbp2
Gspt1
Idh3g
Lmna
Uggt1
Grk5
Dctn1
Phldb2
Krt6a
Prmt1
Blmh
Sh3pxd2b
Nufip2
Insrr
Lima1
Pdia3
Atox1
Fh
Triobp
Phf6
Acadvl
Sigmar1
H2ax
Trap1
Nasp
Rcc2
Cdh2
Npc2
Eif3c
Hpf1
Copb1
Wdr26
Nup160
H2bc14
Clk2
Seh1l
Nosip
Pak2
Hnrnpc
Rbm10
Mdh1
Zkscan3
G3bp1
Tfrc
Psmc6
Hnrnpl
Wnk1
Coro1c
Map1b
Ctnnd1
Ncl
Gcn1
Eif5b
Tpm2
Dhx29
Septin11
Mad1l1
Eif3e
Ogdh
Il1rl1
Dld
Map7d1
Rap1b
Hnrnpll
Rpn1
Cdc27
Asah1
Gns
Igf2bp2
Sprr2b
Cse1l
Gars1
Gnb1
Txndc12
Tns1
Cfl2
Ppp1ca
Rab34
Ftl1
Eif4a1
Lbr
Rrm1
Apool
Rbm42
Zfp2
Rangap1
Pea15
Sqstm1
Nceh1
Xrcc6
Larp4b
Mydgf
Pfn2
Ptma
Mgst2
Ecsit
Atp5f1a
Mrps23
Impa1
Prdx3
Rab23
Ctsz
Tdrd1
Arhgap1
Pgam1
Cox5b
Hnrnpul1
FAM120A
Park7
Phrf1
Tpx2
Luc7l3
Ubxn1
Polr2f
Fbln2
Tsfm
Arpc5l
Idi1
Pigt
Clpp
Csnk1e
Adh5
Srsf4
Eif1ax
B3galt6
Idh2
Cct4
Tmco1
Atp6v1e1
Polr1c
Fkbp9
Hacd3
Clic1
Pcolce
Glyr1
Vat1
Krt79
Exosc2
Fmnl3
Dhx36
Txlna
Erp29
Ddx54
Ivd
Palm
Ide
Mrps22
Cd81
Larp4
Krt4
Ahcy
Fkbp4
Baz1b
Ctdspl2
Cstb
Dsp
Rpl35a
P4ha1
Itgb1
Ankfy1
Ythdf3
Atp6v1g1
Nup50
Chmp5
Ostc
Sh3bgrl3
Ndufa2
Txndc5
Rpl37
Atp6ap2
Wdr70
Tuba1a
Tcf4
Stub1
Gadd45gip1
Gja3
Eif2s1
Igf2
Ak1
Mad2l1
Cnn3
Gnai3
Glod4
Arpc5
Dbnl
Sec22b
Naa50
Hsp90ab1
Samm50
Cpt2
Dlst
Rfc5
Psma3
Oxa1l
Actn4
Sf1
Top2b
Rfc1
Ctnnb1
Srsf6
Hibadh
Mrpl46
Galp
Galnt2
Hnrnpdl
Cdc42
Kif20a
Atp5mc2
Atxn2
Dido1
Cpsf6
Tomm70
Sucla2
Copz1
Sars1
Exosc10
Snu13
Celf1
G6pdx
Znf704
Psma6
Thbd
Zbtb7a
Tufm
Cct2
Ndufv1
Rbm15
Nfix
Mvd
Zc3h4
Tra2a
Vps16
Proser2
Hbb-b1
Fau
Chchd4
Kctd10
Rad23b
Pdcd6
Gnl2
Csde1
Tnks1bp1
Sptan1
Tbrg4
Ddx17
Chmp2a
Rps27a
Cpsf1
Lsm12
Trip12
Ano9
Cavin4
Pfn1
Elavl1
Lrrfip1
Rbms1
Gpr107
Lrp4
Ell
Eps8
Ilk
Mars1
Xrcc1
Mtrex
Adsl
Oxsr1
Nfic
Rab7a
Lamp1
Uchl4
Dnajb11
Cbx3
Hspa4l
Rps17
Slc38a10
Zyg11b
Gulp1
Rock2
Scpep1
Chmp6
Stag2
Cdc5l
Emc3
Mta1
Dnaja3
Specc1
Hmgn5
Tm9sf2
Lgals1
Hmga2
Mfap1a
Me2
Ints8
Anln
Hells
Tpd52l2
Samhd1
Arid1a
Pigs
Grb10
C1qbp
Cycs
NARS1
Noc2l
Drap1
Ccdc86
S100a10
Smc4
Rtn3
Hk1
Sdhc
Col6a2
Pwp1
Hmgb3
Cdc37
Nvl
Uqcrb
Vamp2
Toe1
Efr3a
Tor1aip1
Ddost
Pcbp1
Abce1
Cwc15
Kars1
Aldh9a1
Cisd1
Smarcc2
Lars1
Snx2
Fnbp4
Pgls
Rnf2
Chaf1a
Thop1
Wbp11
Scaf4
Krt13
Ube2i
Ywhag
Ephx1
Vapa
Atp6v0d1
Ilf2
Cstf2t
Gsta4
Parp3
Srek1
Nipsnap1
Rhog
Ctnnbl1
Hip1
Rin1
Bod1l
Dad1
Bag2
Samd1
Cpne2
Aldh3a2
Memo1
Tkt
Pdcd6ip
Srsf5
Tes
Rps23
Septin2
Mapk1
Nln
Cep162
Atxn2l
Atp5me
Ddx6
Sap30
Pgrmc1
Rpl13a
Psmb1
Elac2
Dgat1
Ankrd17
Pmpca
Rnmt
Tmem11
Ddx3x
Camk2d
Tmtc3
Eif1a
Ap2b1
Yeats4
Eftud2
Aldh18a1
Rpl22l1
Pgm1
Atp5mg
Cep290
Me1
Pitpna
Isoc1
Map1s
Serpinf1
Cyb5r3
Ogt
Uqcrfs1
Ttf1
Nup37
Rbx1
Srrm1
Cct5
Etf1
Lamb1
Nup85
Prmt5
Maz
Atp5f1d
Psmc2
Ncoa5
Epn2
Cttn
Sp3
Rttn
Colec12
Ndrg1
Baz1a
M1ap
Agfg1
Cdk9
Slc6a11
Abcf2
Bcat2
Nme1
Btf3
Mrps18b
Cspg4
Nop53
Atp5f1c
Ywhab
Tcp1
Cct8
Echs1
Wdr18
Pitpnb
Rplp0
Mrps7
Fdps
Xrcc5
Pfkm
Rbm28
C4b
Lmnb1
Ndufs3
Rpl30
Lrrc59
Atic
Ghitm
Larp7
Sec23a
Pdhx
Pcbp3
Rab11fip1
Nae1
Papss1
Fam107b
Eif2s3x
Prdx6
Palm2
Erg28
Ppfibp1
Tmed2
Septin7
Dmap1
Atp2a2
Pno1
Hnrnpab
Asph
Wdr33
Rab21
Slirp
Klc1
Gsr
Tnfrsf23
Nup98
Mgst1
Msln
Cox7c
Ptgs2
Otub1
Srbd1
Nup54
Pdcd5
Arl8a
Rpl32
Nedd8
Gtf2i
Pak1ip1
Rars1
Lta4h
Ecpas
P3h3
Rpa3
Eef1e1
Eif5a
Mtdh
Mios
Cnot1
Cpt1a
Yif1b
Uqcrc1
Syncrip
Uba2
Prkaca
Mrpl3
Sdha
Gnas
Ociad1
Pole3
Cav1
Fxr2
Smc3
Cdkn2aip
Ranbp1
Mrpl40
Scrib
Hspe1
Ints3
Ssr1
Thoc2
Ttc1
Timm8b
Cdc16
Fancd2
Fndc3b
Atf2
Ranbp3
Fdxr
Capns1
Baiap2
Eno3
Rfc3
Tm9sf3
Cd44
Srsf9
Usp14
Lsm14a
Diaph3
Zeb1
Srpra
Ttc34
Sypl1
Ech1
Galk1
Cops5
Kank2
Eprs1
Maoa
Nomo1
Snx1
Apoa1
Ilkap
Ubap2l
Sh3gl1
Pspc1
Tsr1
Ppp1r18
Fbln5
Slc38a2
Os9
Cast
Eif3m
Erp44
Plau
Zfyve27
Adk
Sdad1
Nsun2
Agps
Oxct1
Cox6c
Dkc1
Ahctf1
Wapl
Igfbp6
Procr
Ybx1
Gatad2b
Plod1
Copa
Ppp2r2d
Cpox
Acta2
Pck2
Rplp2
Hdac1
Men1
Ddb1
Skp1
Poldip2
Psmd13
Nudcd1
Polr2a
Zyx
Fis1
Pabpn1
Mtap
Senp3
Luc7l2
Igf2bp3
Pcca
Morf4l2
Pgrmc2
Rab11fip5
Itpr3
Dpysl3
Rab8a
Sec23b
Hirip3
Cd2ap
Pzp
Mycbp
Nmt1
Hnrnph2
Hmgb2
Sorbs1
Hars1
Myo1d
Calm1
Pfkl
Suclg2
Shmt2
Dnajc25
Xpnpep1
Rheb
Ndufa4
Chd4
Sugt1
Cebpz
Cacybp
Myef2
Sh3kbp1
Prcp
Rad18
Hadh
Gdi2
Pitrm1
Cops6
Col6a1
Septin9
Ptgr1
Mtx2
Acaa2
Fubp1
Tspo
Prps1
Gna13
Sf3b4
Nudt21
Rps14
Dlat
Stx4
Gprc5a
Znrd2
Rala
Srp54
Letm1
Cmpk1
Psmc3
Zranb2
Pum1
Eef1b
Tdp1
Hpcal1
Nom1
Pip4k2b
Parp1
Col1a2
Cyp20a1
Erlin1
Slk
Slx9
Nop56
Trrap
Kdelr2
Dnm1l
Psat1
Emc4
Npm3
Ctcf
Ctsa
Ptgs1
Mvp
Snrpf
Lman2
Cstf3
Smarca5
Sf3b1
Rbbp7
Rbm5
Sccpdh
Psmb7
Scp2
Cyb5r1
Csnk1a1
Cyb5b
Gorab
Gtf2f2
Calu
Vamp7
Lox
Far1
Mlec
Smc1b
Psmd5
Gna11
Eif2s2
Psmd7
Lpp
Rap2b
Fndc3a
Apex1
Ints10
Arfgap2
Pqbp1
Eif2b4
Psmd6
Lrrc41
Purb
Npepps
Hcfc1
Ilf3
Son
Thoc5
Rif1
Psph
Acot9
Psmd14
Dynll2
Hnrnph1
Aldh7a1
Anxa4
Cstf1
Txn2
Eif3k
Rpl3
Ehd4
Pacsin3
Epm2aip1
Fbxl4
Slc25a1
Fkbp11
Mrpl45
Ensa
Tsn
Mta2
Ccdc137
Eif2a
Ccdc88a
Colgalt1
Tomm22
Srsf1
Pcid2
Gli3
Mdh2
Cox6b1
Acaa1a
RO60
H2-D1
Atp6v0a2
Ccdc47
Cpsf4
Tial1
Stmn1
Glipr2
Fosl2
Mthfd1l
Nsfl1c
Rrbp1
Mrps34
Ulk1
Rcor1
Ppp2r1a
Aqp1
Dctn2
Xpo7
Puf60
Aifm1
Polr1f
Fmr1
Cux1
Pds5a
Mki67
Aebp1
Tardbp
Psap
Rybp
Canx
Cap1
Hsd17b7
Lrp1
Pcnp
Anxa2
Steap3
Sin3a
Nup35
Tfam
Cnbp
Ppp1r7
Dnttip2
Micos13
Ubxn4
Ap2a2
Mtch1
Specc1l
Frg1
Fam162a
Fermt2
Prrx1
Vps26b
Ints14
Kirrel1
Prrc2c
Prpf40a
Psmb6
Ppp1cb
Hdgfl2
Nploc4
Bysl
Phka1
Mxra7
Hspa9
Tex264
Smc2
Mecp2
Cdk4
Mcm6
Ly6a
Abcd3
Tm7sf2
Nop2
Huwe1
Bap18
Api5
Rab5b
Napa
Znf512
Nudt16l1
Mdc1
Cars1
Tmem106b
Srpk1
Ppp1r10
Znhit6
Rps19bp1
Srsf10
Brd2
Decr2
Cnot10
Copg1
Jpt2
Nit2
Ndufa10
Nolc1
Ccar1
Scarf2
Afdn
Msh6
Pdxdc1
Sec11a
Slc7a5
Psmd3
Aco2
Ehd3
Tanc1
Ddx27
Carnmt1
Cd63
Papola
Fhl2
Cltb
Poglut1
Ipo9
Tmx1
Ddx21
Psmb4
Tecr
Ebf3
Utp15
Marcks
Ctsd
Larp1
Ckap4
Jmjd1c
Eif4a2
Grwd1
Plgrkt
Abcc1
Las1l
Ctsl
Rdh13
Vkorc1l1
Med24
P3h4
Pafah1b2
Acad9
Por
Ndufv2
Pds5b
Yars2
Mtpap
Psmd1
Ipo5
Raver1
Mcm7
Kpnb1
Prkaa1
Metap1
Capn2
Set
Serpinb6
Ccnt1
Upf2
Cwc25
Rac1
Hsd17b12
Zc3h11a
Snrnp27
Akr1b1
Pdlim7
Txn
Smc1a
Dync1i2
Capza2
Psmd2
Rap1gds1
Prkca
Ddx5
Hnrnpm
Ctps1
Topbp1
Acot7
Pmvk
Dpf2
Rnf40
Hmgn1
Morf4l1
Rpl23a
Riox1
Lamtor2
Cox5a
Sar1a
Smu1
Sumo2
Pdlim5
Cers6
Svil
Vdac3
Jpt1
Adam9
Vrk1
Aurkaip1
Psmb5
Tmem33
Rab18
Usp33
Atp2b1
Ranbp2
Tspan31
Dcakd
Akr1b8
Nt5c2
Nucks1
Eif4g1
Mrto4
Smarcad1
Ptrh2
Ppil1
Exosc3
Pin4
Copb2
Kpna4
Capg
Mxra8
Wdr82
Capn1
Slfn9
Ddt
Slc7a1
Txnl1
Gnaq
Ppih
Dis3
Ssr4
Sltm
Dip2b
Uso1
Prep
Scamp1
Ndufa13
Flot1
Acat2
Erbin
Macf1
Vdac2
Higd1a
Atf1
Polr1d
Chmp1a
Mrpl12
Stx12
Dync1li1
Nradd
Sepsecs
Txnl4a
Golga5
Afap1
Polr3b
Usp7
Nup133
Naa15
Sri
Rpl36a
Cand1
Pdia5
Ola1
Ldlr
Myadm
M6pr
Lgals3
Zfr
Ralgapb
Nat10
Rrp8
Creld2
Klf13
Dnaja2
Arhgap17
Tubb5
Golim4
Amot
Cct7
Fkbp7
Lamp2
Faf1
Cnot3
Rbbp4
Rab6a
Taok3
Nup58
Arf5
Pnpt1
Rnps1
Banf1
Ran
Gemin5
Hspg2
Eif4a3
Ptgis
Tubb4b
Bin1
Pttg1ip
Micall2
Skic8
Tox4
Myof
Col1a1
Krt19
Ifi204
Ehd1
Tmem43
Sdc2
Plbd2
Cops7a
Anp32a
Kin
Wtap
Ftsj3
Prdx2
Basp1
Pacsin2
Acly
Eif3j2
Slco2a1
Txnrd1
Uqcrc2
Sf3b6
Nsf
Cyb5a
Ndufab1
Ktn1
Actg1
Eif3h
Emc1
Gpc1
Rcn1
Acadsb
Lyar
Oat
Mesd
Bzw1
Flna
Gnl3
F5
Acadl
Ttc41
Uhrf1
Ctnna1
Gnao1
Tpm4
Actn1
Edc4
Uchl5
Cep170
Ddx25
Dynll1
Pfdn2
Rasa4
Wdhd1
Romo1
Cav2
Efemp1
Ube2n
Sap18
Bub3
Tcea1
Eif4h
Serbp1
Vasp
Esyt2
Gk
Ldhb
Snrpn
Gnai2
Nap1l4
Lsm8
Gtpbp4
Rbm7
Rbm17
Rbmxl1
Idh3a
Dnajb4
Atad3
Cct3
Psmc5
Gmps
Sfxn3
Tjp2
Kpna3
Uba1
Iars1
Atp6v1c1
Ercc6l
Dock7
[truncated: 216 more rows]

## Sheet:  list for DNA pull down
DNA pull down symbols（Mus）(2216)
Accession	Gene Name		Description	Coverage [%]	# Peptides	# PSMs	# Unique Peptides	# AAs	MW [kDa]	calc. pI
Q8BP71	Rbfox2	Rpl7a	RNA binding protein fox-1 homolog 2 OS=Mus musculus OX=10090 GN=Rbfox2 PE=1 SV=2	7	3	3	3	449	47.3	6.55
Q9EPC1	Parva	H1-4	Alpha-parvin OS=Mus musculus OX=10090 GN=Parva PE=1 SV=1	14	4	4	4	372	42.3	5.95
Q8R3F5	Mcat	Hpn	Malonyl-CoA-acyl carrier protein transacylase, mitochondrial OS=Mus musculus OX=10090 GN=Mcat PE=1 SV=3	4	1	1	1	381	41.9	8.1
O08715	Akap1	Pkm	A-kinase anchor protein 1, mitochondrial OS=Mus musculus OX=10090 GN=Akap1 PE=1 SV=4	2	1	1	1	857	92.1	5.02
P45952	Acadm	Npm1	Medium-chain specific acyl-CoA dehydrogenase, mitochondrial OS=Mus musculus OX=10090 GN=Acadm PE=1 SV=1	15	6	6	6	421	46.5	8.37
Q9CSU0	Rprd1b	Arpc2	Regulation of nuclear pre-mRNA domain-containing protein 1B OS=Mus musculus OX=10090 GN=Rprd1b PE=1 SV=2	3	1	1	1	326	36.9	5.97
Q99LC5	Etfa	Hnrnpd	Electron transfer flavoprotein subunit alpha, mitochondrial OS=Mus musculus OX=10090 GN=Etfa PE=1 SV=2	44	10	11	10	333	35	8.38
Q61584	Fxr1	Krt16	RNA-binding protein FXR1 OS=Mus musculus OX=10090 GN=Fxr1 PE=1 SV=2	20	11	11	10	677	76.2	6.98
Q6P4S8	Ints1	U2af1	Integrator complex subunit 1 OS=Mus musculus OX=10090 GN=Ints1 PE=1 SV=2	0	1	1	1	2195	245	6.28
Q31125	Slc39a7	Hnrnpa2b1	Zinc transporter SLC39A7 OS=Mus musculus OX=10090 GN=Slc39a7 PE=1 SV=2	2	1	1	1	476	50.6	6.87
P53026	Rpl10a	Psip1	60S ribosomal protein L10a OS=Mus musculus OX=10090 GN=Rpl10a PE=1 SV=3	40	10	14	10	217	24.9	9.98
P46467	Vps4b	Ckm	Vacuolar protein sorting-associated protein 4B OS=Mus musculus OX=10090 GN=Vps4b PE=1 SV=2	4	2	2	2	444	49.4	7.11
O70475	Ugdh	Rpl7	UDP-glucose 6-dehydrogenase OS=Mus musculus OX=10090 GN=Ugdh PE=1 SV=1	19	8	8	8	493	54.8	7.56
Q8BH59	Slc25a12	H2ac4	Electrogenic aspartate/glutamate antiporter SLC25A12, mitochondrial OS=Mus musculus OX=10090 GN=Slc25a12 PE=1 SV=1	16	9	10	7	677	74.5	8.25
Q8BG81	Poldip3	Hp1bp3	Polymerase delta-interacting protein 3 OS=Mus musculus OX=10090 GN=Poldip3 PE=1 SV=1	21	7	7	7	420	46.1	10.05
Q8BMA6	Srp68	Fn1	Signal recognition particle subunit SRP68 OS=Mus musculus OX=10090 GN=Srp68 PE=1 SV=2	4	3	3	3	625	70.5	8.57
P70670	Naca	Krt2	Nascent polypeptide-associated complex subunit alpha, muscle-specific form OS=Mus musculus OX=10090 GN=Naca PE=1 SV=2	4	6	8	6	2187	220.4	9.35
Q7TPC1	Cdsn	Prdx1	Corneodesmosin OS=Mus musculus OX=10090 GN=Cdsn PE=2 SV=2	2	1	1	1	561	54.3	9.28
Q9JLV6	Pnkp	Rpl10l	Bifunctional polynucleotide phosphatase/kinase OS=Mus musculus OX=10090 GN=Pnkp PE=1 SV=2	9	5	5	5	522	57.2	7.9
Q6P5G6	Ubxn7	S100a4	UBX domain-containing protein 7 OS=Mus musculus OX=10090 GN=Ubxn7 PE=1 SV=2	4	2	2	2	467	52.1	5.03
Q9CQR4	Acot13	Rpl4	Acyl-coenzyme A thioesterase 13 OS=Mus musculus OX=10090 GN=Acot13 PE=1 SV=1	9	1	1	1	140	15.2	8.82
Q3TCX3	Khdc4	Lyz1	KH homology domain-containing protein 4 OS=Mus musculus OX=10090 GN=Khdc4 PE=1 SV=1	2	1	1	1	612	64.5	8.73
E9PYH6	Setd1a	Rpl37a	Histone-lysine N-methyltransferase SETD1A OS=Mus musculus OX=10090 GN=Setd1a PE=1 SV=1	1	1	1	1	1716	185.9	5.06
Q9DCL9	Paics	Arpc1b	Bifunctional phosphoribosylaminoimidazole carboxylase/phosphoribosylaminoimidazole succinocarboxamide synthetase OS=Mus musculus OX=10090 GN=Paics PE=1 SV=4	21	7	7	7	425	47	7.23
Q91WD5	Ndufs2	Arpc4	NADH dehydrogenase [ubiquinone] iron-sulfur protein 2, mitochondrial OS=Mus musculus OX=10090 GN=Ndufs2 PE=1 SV=1	2	1	1	1	463	52.6	6.99
P70677	Casp3	Jup	Caspase-3 OS=Mus musculus OX=10090 GN=Casp3 PE=1 SV=1	7	2	2	2	277	31.5	6.92
Q922V4	Plrg1	Myl11	Pleiotropic regulator 1 OS=Mus musculus OX=10090 GN=Plrg1 PE=1 SV=1	11	5	5	5	513	56.9	9.17
Q9QZD8	Slc25a10	Rps13	Mitochondrial dicarboxylate carrier OS=Mus musculus OX=10090 GN=Slc25a10 PE=1 SV=2	5	1	1	1	287	31.7	9.32
Q9CYR0	Ssbp1	Rpl8	Single-stranded DNA-binding protein, mitochondrial OS=Mus musculus OX=10090 GN=Ssbp1 PE=1 SV=1	20	3	3	3	152	17.3	9.92
P49722	Psma2	Hnrnpa1	Proteasome subunit alpha type-2 OS=Mus musculus OX=10090 GN=Psma2 PE=1 SV=3	32	5	7	5	234	25.9	7.43
P20029	Hspa5	Rps8	Endoplasmic reticulum chaperone BiP OS=Mus musculus OX=10090 GN=Hspa5 PE=1 SV=3	47	29	42	28	655	72.4	5.16
Q6NS46	Pdcd11	Eef1a1	Protein RRP5 homolog OS=Mus musculus OX=10090 GN=Pdcd11 PE=1 SV=2	6	10	10	10	1862	207.6	8.75
Q9D8S4	Rexo2	Hmga1	Oligoribonuclease, mitochondrial OS=Mus musculus OX=10090 GN=Rexo2 PE=1 SV=2	3	1	1	1	237	26.7	7.15
P61027	Rab10	S100a11	Ras-related protein Rab-10 OS=Mus musculus OX=10090 GN=Rab10 PE=1 SV=1	34	6	9	4	200	22.5	8.38
Q6ZPR5	Smpd4	Krt36	Sphingomyelin phosphodiesterase 4 OS=Mus musculus OX=10090 GN=Smpd4 PE=1 SV=2	3	2	2	2	823	93.2	8.13
Q9EST5	Anp32b	Rps24	Acidic leucine-rich nuclear phosphoprotein 32 family member B OS=Mus musculus OX=10090 GN=Anp32b PE=1 SV=1	18	4	4	4	272	31.1	4.01
Q8R3Q6	Mix23	Rps18	Protein MIX23 OS=Mus musculus OX=10090 GN=Mix23 PE=1 SV=1	12	1	1	1	144	16.7	8.16
Q8R3N6	Thoc1	Top1	THO complex subunit 1 OS=Mus musculus OX=10090 GN=Thoc1 PE=1 SV=1	3	2	2	2	657	75.4	4.97
P56399	Usp5	U2af2	Ubiquitin carboxyl-terminal hydrolase 5 OS=Mus musculus OX=10090 GN=Usp5 PE=1 SV=1	7	4	4	4	858	95.8	5.01
Q64727	Vcl	Rpl29	Vinculin OS=Mus musculus OX=10090 GN=Vcl PE=1 SV=4	48	44	46	44	1066	116.6	6
Q62318	Trim28	Rpl17	Transcription intermediary factor 1-beta OS=Mus musculus OX=10090 GN=Trim28 PE=1 SV=3	28	19	20	19	834	88.8	5.77
P46735	Myo1b	Krt31	Unconventional myosin-Ib OS=Mus musculus OX=10090 GN=Myo1b PE=1 SV=3	7	7	7	7	1107	128.5	9.26
O70325	Gpx4	Rpl36	Phospholipid hydroperoxide glutathione peroxidase OS=Mus musculus OX=10090 GN=Gpx4 PE=1 SV=4	4	1	1	1	197	22.2	8.46
Q3UMF0	Cobll1	Rps6	Cordon-bleu protein-like 1 OS=Mus musculus OX=10090 GN=Cobll1 PE=1 SV=2	4	4	4	4	1273	137.3	8.16
Q6P5B0	Rrp12	Krt42	RRP12-like protein OS=Mus musculus OX=10090 GN=Rrp12 PE=1 SV=1	8	9	9	9	1295	143	8.91
Q9WV92	Epb41l3	Rpl27a	Band 4.1-like protein 3 OS=Mus musculus OX=10090 GN=Epb41l3 PE=1 SV=1	10	8	8	6	929	103.3	5.31
Q8BZW8	Nhlrc2	Rps15	NHL repeat-containing protein 2 OS=Mus musculus OX=10090 GN=Nhlrc2 PE=1 SV=1	1	1	1	1	725	78.4	5.54
Q9Z1N5	Ddx39b	Rpl23	Spliceosome RNA helicase Ddx39b OS=Mus musculus OX=10090 GN=Ddx39b PE=1 SV=1	47	18	21	18	428	49	5.67
Q922R8	Pdia6	Capzb	Protein disulfide-isomerase A6 OS=Mus musculus OX=10090 GN=Pdia6 PE=1 SV=3	26	8	9	8	440	48.1	5.14
Q06138	Cab39	Rpn2	Calcium-binding protein 39 OS=Mus musculus OX=10090 GN=Cab39 PE=1 SV=2	2	1	1	1	341	39.8	6.89
Q9CZ91	Srfbp1	C3	Serum response factor-binding protein 1 OS=Mus musculus OX=10090 GN=Srfbp1 PE=1 SV=1	14	5	5	5	441	48.7	9.54
P09103	P4hb	Tgm1	Protein disulfide-isomerase OS=Mus musculus OX=10090 GN=P4hb PE=1 SV=2	59	28	38	28	509	57	4.88
Q9Z2Q6	Septin5	Atp5f1b	Septin-5 OS=Mus musculus OX=10090 GN=Septin5 PE=1 SV=2	5	2	2	2	369	42.7	6.67
Q6PAQ4	Rexo4	Krt1	RNA exonuclease 4 OS=Mus musculus OX=10090 GN=Rexo4 PE=2 SV=2	6	2	2	2	432	47.6	9.91
Q01320	Top2a	Anxa1	DNA topoisomerase 2-alpha OS=Mus musculus OX=10090 GN=Top2a PE=1 SV=2	19	27	27	17	1528	172.7	8.6
P49718	Mcm5	Krt72	DNA replication licensing factor MCM5 OS=Mus musculus OX=10090 GN=Mcm5 PE=1 SV=2	6	4	4	4	734	82.4	8.29
P61759	Vbp1	Actr2	Prefoldin subunit 3 OS=Mus musculus OX=10090 GN=Vbp1 PE=1 SV=2	5	1	1	1	196	22.4	6.28
Q3TCH7	Cul4a	Fbl	Cullin-4A OS=Mus musculus OX=10090 GN=Cul4a PE=1 SV=1	1	1	1	1	759	87.7	8.35
O35639	Anxa3	Rpl19	Annexin A3 OS=Mus musculus OX=10090 GN=Anxa3 PE=1 SV=4	59	14	18	13	323	36.4	5.76
Q8BMD8	Slc25a24	Rps11	Calcium-binding mitochondrial carrier protein SCaMC-1 OS=Mus musculus OX=10090 GN=Slc25a24 PE=1 SV=1	23	11	11	11	475	52.9	7.43
Q2L4X1	Bzw2	Rps27	eIF5-mimic protein 1 OS=Mus musculus molossinus OX=57486 GN=Bzw2 PE=2 SV=1	2	1	1	1	419	48	6.68
Q924Z4	Cers2	Tmod3	Ceramide synthase 2 OS=Mus musculus OX=10090 GN=Cers2 PE=1 SV=1	4	1	1	1	380	45	8.75
Q922B2	Dars1	Krt75	Aspartate--tRNA ligase, cytoplasmic OS=Mus musculus OX=10090 GN=Dars1 PE=1 SV=2	17	8	8	8	501	57.1	6.49
Q810A7	Ddx42	Krt79	ATP-dependent RNA helicase DDX42 OS=Mus musculus OX=10090 GN=Ddx42 PE=1 SV=3	5	4	4	4	929	101.9	6.98
P70349	Hint1	Slc25a5	Adenosine 5'-monophosphoramidase HINT1 OS=Mus musculus OX=10090 GN=Hint1 PE=1 SV=3	46	3	3	3	126	13.8	6.87
O08579	Emd	Rpl31	Emerin OS=Mus musculus OX=10090 GN=Emd PE=1 SV=1	14	3	3	3	259	29.4	5.01
P63154	Crnkl1	Dsp	Crooked neck-like protein 1 OS=Mus musculus OX=10090 GN=Crnkl1 PE=1 SV=1	2	1	1	1	690	83.4	6.93
Q8K327	Champ1	Dsg1b	Chromosome alignment-maintaining phosphoprotein 1 OS=Mus musculus OX=10090 GN=Champ1 PE=1 SV=1	3	3	3	3	802	87.5	7.85
Q08093	Cnn2	Cpsf6	Calponin-2 OS=Mus musculus OX=10090 GN=Cnn2 PE=1 SV=1	30	7	7	6	305	33.1	7.62
O88908	Soat2	H1-5	Sterol O-acyltransferase 2 OS=Mus musculus OX=10090 GN=Soat2 PE=1 SV=2	4	1	1	1	525	60.6	8.81
P70210	Tead3	Rps27a	Transcriptional enhancer factor TEF-5 OS=Mus musculus OX=10090 GN=Tead3 PE=1 SV=2	3	2	2	2	439	48.9	8.4
Q8BFZ3	Actbl2	Actb	Beta-actin-like protein 2 OS=Mus musculus OX=10090 GN=Actbl2 PE=1 SV=1	30	8	34	3	376	42	5.49
Q91WQ3	Yars1	Krt34	Tyrosine--tRNA ligase, cytoplasmic OS=Mus musculus OX=10090 GN=Yars1 PE=1 SV=3	23	12	13	12	528	59.1	7.01
A2A891	Camta1	Krt86	Calmodulin-binding transcription activator 1 OS=Mus musculus OX=10090 GN=Camta1 PE=2 SV=1	1	1	1	1	1682	184.2	7.77
Q8BL97	Srsf7	Rps3a	Serine/arginine-rich splicing factor 7 OS=Mus musculus OX=10090 GN=Srsf7 PE=1 SV=1	17	5	6	4	267	30.8	11.9
Q9D5T0	Atad1	Hmga2	Outer mitochondrial transmembrane helix translocase OS=Mus musculus OX=10090 GN=Atad1 PE=1 SV=1	11	3	3	3	361	40.7	6.9
Q9CQR2	Rps21	Krt85	40S ribosomal protein S21 OS=Mus musculus OX=10090 GN=Rps21 PE=1 SV=1	40	3	4	3	83	9.1	8.51
Q9JII6	Akr1a1	Rpl28	Aldo-keto reductase family 1 member A1 OS=Mus musculus OX=10090 GN=Akr1a1 PE=1 SV=3	9	2	2	2	325	36.6	7.39
Q61576	Fkbp10	Tubb3	Peptidyl-prolyl cis-trans isomerase FKBP10 OS=Mus musculus OX=10090 GN=Fkbp10 PE=1 SV=2	13	6	6	6	581	64.7	5.64
Q99LF4	Rtcb	Rpl11	RNA-splicing ligase RtcB homolog OS=Mus musculus OX=10090 GN=Rtcb PE=1 SV=1	25	10	12	10	505	55.2	7.23
Q7TSY8	Sgo2	Ppia	Shugoshin 2 OS=Mus musculus OX=10090 GN=Sgo2 PE=1 SV=1	1	1	1	1	1164	130.2	8.76
P43024	Cox6a1	Fip1l1	Cytochrome c oxidase subunit 6A1, mitochondrial OS=Mus musculus OX=10090 GN=Cox6a1 PE=1 SV=2	14	1	1	1	111	12.3	9.98
Q9EP72	Emc7	Rpl27	ER membrane protein complex subunit 7 OS=Mus musculus OX=10090 GN=Emc7 PE=1 SV=1	5	1	1	1	241	26.3	9.23
Q99MR6	Srrt	Erh	Serrate RNA effector molecule homolog OS=Mus musculus OX=10090 GN=Srrt PE=1 SV=1	16	12	12	12	875	100.4	5.97
Q99J09	Wdr77	Rps2	Methylosome protein 50 OS=Mus musculus OX=10090 GN=Wdr77 PE=1 SV=1	2	1	2	1	342	36.9	5.27
Q9DC71	Mrps15	Krt82	28S ribosomal protein S15, mitochondrial OS=Mus musculus OX=10090 GN=Mrps15 PE=1 SV=2	3	1	1	1	258	29.4	10.13
Q5SW28	Pik3r5	H4c1	Phosphoinositide 3-kinase regulatory subunit 5 OS=Mus musculus OX=10090 GN=Pik3r5 PE=1 SV=1	1	1	1	1	871	96.9	6.95
Q9EPE9	Atp13a1	Hnrnpk	Endoplasmic reticulum transmembrane helix translocase OS=Mus musculus OX=10090 GN=Atp13a1 PE=1 SV=2	2	2	2	2	1200	132.3	8.03
P39053	Dnm1	Rpl14	Dynamin-1 OS=Mus musculus OX=10090 GN=Dnm1 PE=1 SV=2	6	5	5	1	867	97.7	7.74
P52479	Usp10	Tgm3	Ubiquitin carboxyl-terminal hydrolase 10 OS=Mus musculus OX=10090 GN=Usp10 PE=1 SV=3	3	2	2	2	792	87	5.17
Q4FK66	Prpf38a	Rpl32	Pre-mRNA-splicing factor 38A OS=Mus musculus OX=10090 GN=Prpf38a PE=1 SV=1	7	2	2	2	312	37.4	10.01
Q8K368	Fanci	Eno3	Fanconi anemia group I protein homolog OS=Mus musculus OX=10090 GN=Fanci PE=1 SV=2	1	1	1	1	1330	149.2	6.16
P62821	Rab1A	Ahsg	Ras-related protein Rab-1A OS=Mus musculus OX=10090 GN=Rab1A PE=1 SV=3	53	9	11	4	205	22.7	6.21
Q64737	Gart	Krt76	Trifunctional purine biosynthetic protein adenosine-3 OS=Mus musculus OX=10090 GN=Gart PE=1 SV=3	4	3	3	3	1010	107.4	6.68
Q9CXI5	Manf	Hspa8	Mesencephalic astrocyte-derived neurotrophic factor OS=Mus musculus OX=10090 GN=Manf PE=1 SV=1	30	4	4	4	179	20.4	8.07
Q8BFY9	Tnpo1	Ptbp1	Transportin-1 OS=Mus musculus OX=10090 GN=Tnpo1 PE=1 SV=2	4	4	4	2	898	102.3	4.98
Q3UMR5	Mcu	Cdk11b	Calcium uniporter protein, mitochondrial OS=Mus musculus OX=10090 GN=Mcu PE=1 SV=2	2	1	1	1	350	39.7	8.56
P45878	Fkbp2	Tmprss13	Peptidyl-prolyl cis-trans isomerase FKBP2 OS=Mus musculus OX=10090 GN=Fkbp2 PE=1 SV=1	9	2	2	2	140	15.3	8.88
Q9D023	Mpc2	Tcof1	Mitochondrial pyruvate carrier 2 OS=Mus musculus OX=10090 GN=Mpc2 PE=1 SV=1	9	1	1	1	127	14.3	10.61
O70378	Emc8	Dbn1	ER membrane protein complex subunit 8 OS=Mus musculus OX=10090 GN=Emc8 PE=1 SV=1	5	1	1	1	207	23.3	6.15
Q9JKF1	Iqgap1	Rps4x	Ras GTPase-activating-like protein IQGAP1 OS=Mus musculus OX=10090 GN=Iqgap1 PE=1 SV=2	20	28	29	28	1657	188.6	6.48
P14824	Anxa6	Rps25	Annexin A6 OS=Mus musculus OX=10090 GN=Anxa6 PE=1 SV=3	44	29	34	28	673	75.8	5.5
Q99LD9	Eif2b2	Rpl24	Translation initiation factor eIF-2B subunit beta OS=Mus musculus OX=10090 GN=Eif2b2 PE=1 SV=1	9	2	2	2	351	38.9	6.24
P27546	Map4	H1-0	Microtubule-associated protein 4 OS=Mus musculus OX=10090 GN=Map4 PE=1 SV=3	17	13	13	13	1125	117.4	4.98
Q8BI84	Mia3	Myo1c	Transport and Golgi organization protein 1 homolog OS=Mus musculus OX=10090 GN=Mia3 PE=1 SV=2	0	1	1	1	1930	213.5	4.75
Q6PCM2	Ints6	Rps26	Integrator complex subunit 6 OS=Mus musculus OX=10090 GN=Ints6 PE=1 SV=1	1	1	1	1	883	99.6	8.78
Q9JKB3	Ybx3	Myl6	Y-box-binding protein 3 OS=Mus musculus OX=10090 GN=Ybx3 PE=1 SV=2	21	6	8	3	361	38.8	9.69
Q5XG71	Utp20	Rpl26	Small subunit processome component 20 homolog OS=Mus musculus OX=10090 GN=Utp20 PE=1 SV=2	4	9	9	9	2788	317.5	8.09
Q8C3P7	Mettl3	Pkp1	N6-adenosine-methyltransferase subunit METTL3 OS=Mus musculus OX=10090 GN=Mettl3 PE=1 SV=2	1	1	1	1	580	64.6	6.49
Q61239	Fnta	Rps9	Protein farnesyltransferase/geranylgeranyltransferase type-1 subunit alpha OS=Mus musculus OX=10090 GN=Fnta PE=1 SV=1	2	1	1	1	377	44	4.93
Q62018	Ctr9	Anxa2	RNA polymerase-associated protein CTR9 homolog OS=Mus musculus OX=10090 GN=Ctr9 PE=1 SV=2	1	1	1	1	1173	133.3	6.49
P10078	Zfp28	Cct6a	Zinc finger protein 28 OS=Mus musculus OX=10090 GN=Zfp28 PE=2 SV=3	2	2	2	1	825	93.3	9.17
Q8VE37	Rcc1	Hnrnpa3	Regulator of chromosome condensation OS=Mus musculus OX=10090 GN=Rcc1 PE=1 SV=1	19	5	5	5	421	44.9	8.1
Q8BG32	Psmd11	H3c2	26S proteasome non-ATPase regulatory subunit 11 OS=Mus musculus OX=10090 GN=Psmd11 PE=1 SV=3	26	9	9	9	422	47.4	6.48
Q0GNC1	Inf2	Gapdh	Inverted formin-2 OS=Mus musculus OX=10090 GN=Inf2 PE=1 SV=1	4	5	5	5	1273	138.5	5.21
Q61599	Arhgdib	Tpm3	Rho GDP-dissociation inhibitor 2 OS=Mus musculus OX=10090 GN=Arhgdib PE=1 SV=3	11	1	1	1	200	22.8	5.11
P10605	Ctsb	Rpl13	Cathepsin B OS=Mus musculus OX=10090 GN=Ctsb PE=1 SV=2	12	3	3	3	339	37.3	5.91
P29341	Pabpc1	S100a6	Polyadenylate-binding protein 1 OS=Mus musculus OX=10090 GN=Pabpc1 PE=1 SV=2	35	21	26	21	636	70.6	9.5
O08756	Hsd17b10	Pof1b	3-hydroxyacyl-CoA dehydrogenase type-2 OS=Mus musculus OX=10090 GN=Hsd17b10 PE=1 SV=4	25	4	5	4	261	27.4	8.41
P23950	Zfp36l1	Myh9	mRNA decay activator protein ZFP36L1 OS=Mus musculus OX=10090 GN=Zfp36l1 PE=1 SV=1	5	1	1	1	338	36.4	7.96
P19783	Cox4i1	Srsf3	Cytochrome c oxidase subunit 4 isoform 1, mitochondrial OS=Mus musculus OX=10090 GN=Cox4i1 PE=1 SV=2	41	6	7	6	169	19.5	9.23
P07901	Hsp90aa1	Rpl15	Heat shock protein HSP 90-alpha OS=Mus musculus OX=10090 GN=Hsp90aa1 PE=1 SV=4	51	37	48	25	733	84.7	5.01
Q8C2Q3	Rbm14	Serpinh1	RNA-binding protein 14 OS=Mus musculus OX=10090 GN=Rbm14 PE=1 SV=1	18	10	10	10	669	69.4	9.67
Q4VAA2	Cdv3	Alb	Protein CDV3 OS=Mus musculus OX=10090 GN=Cdv3 PE=1 SV=2	14	3	3	3	281	29.7	6.1
Q9D168	Ints12	Rpl23a	Integrator complex subunit 12 OS=Mus musculus OX=10090 GN=Ints12 PE=1 SV=1	3	1	1	1	461	48.5	9.69
Q9Z0H4	Celf2	Krt6b	CUGBP Elav-like family member 2 OS=Mus musculus OX=10090 GN=Celf2 PE=1 SV=1	2	2	2	2	508	54.2	8.76
Q9CRB2	Nhp2	Cfl1	H/ACA ribonucleoprotein complex subunit 2 OS=Mus musculus OX=10090 GN=Nhp2 PE=1 SV=1	28	3	3	3	153	17.2	8.41
Q9D1J3	Sarnp	Rps12	SAP domain-containing ribonucleoprotein OS=Mus musculus OX=10090 GN=Sarnp PE=1 SV=3	34	6	6	6	210	23.5	6.65
Q8BVA5	Ldah	Krt80	Lipid droplet-associated hydrolase OS=Mus musculus OX=10090 GN=Ldah PE=1 SV=1	4	1	1	1	326	37.3	8.28
Q8BZR9	Ncbp3	Krt10	Nuclear cap-binding protein subunit 3 OS=Mus musculus OX=10090 GN=Ncbp3 PE=1 SV=1	2	1	1	1	615	70	5.8
Q9Z315	Sart1	Hspd1	U4/U6.U5 tri-snRNP-associated protein 1 OS=Mus musculus OX=10090 GN=Sart1 PE=1 SV=1	22	13	14	13	806	90.8	5.82
Q91Z31	Ptbp2	Rps3	Polypyrimidine tract-binding protein 2 OS=Mus musculus OX=10090 GN=Ptbp2 PE=1 SV=2	7	3	4	2	531	57.5	8.66
Q505F5	Lrrc47	Actc1	Leucine-rich repeat-containing protein 47 OS=Mus musculus OX=10090 GN=Lrrc47 PE=1 SV=1	1	1	1	1	581	63.6	8.1
Q6P5D8	Smchd1	Actr3	Structural maintenance of chromosomes flexible hinge domain-containing protein 1 OS=Mus musculus OX=10090 GN=Smchd1 PE=1 SV=2	11	19	21	19	2007	225.5	7.24
Q569Z6	Thrap3	Hnrnpu	Thyroid hormone receptor-associated protein 3 OS=Mus musculus OX=10090 GN=Thrap3 PE=1 SV=1	20	16	21	15	951	108.1	10.17
Q9WUM5	Suclg1	Rps15a	Succinate--CoA ligase [ADP/GDP-forming] subunit alpha, mitochondrial OS=Mus musculus OX=10090 GN=Suclg1 PE=1 SV=4	18	4	4	4	346	36.1	9.39
P63082	Atp6v0c	Krt14	V-type proton ATPase 16 kDa proteolipid subunit c OS=Mus musculus OX=10090 GN=Atp6v0c PE=1 SV=1	12	1	1	1	155	15.8	9.13
Q99LD8	Ddah2	Rpl21	N(G),N(G)-dimethylarginine dimethylaminohydrolase 2 OS=Mus musculus OX=10090 GN=Ddah2 PE=1 SV=1	15	4	4	3	285	29.6	6.01
Q9QUI0	Rhoa	Rpl6	Transforming protein RhoA OS=Mus musculus OX=10090 GN=Rhoa PE=1 SV=1	23	4	4	4	193	21.8	6.1
Q61990	Pcbp2	Krt5	Poly(rC)-binding protein 2 OS=Mus musculus OX=10090 GN=Pcbp2 PE=1 SV=1	39	10	12	4	362	38.2	6.79
Q8CBW3	Abi1	H1-2	Abl interactor 1 OS=Mus musculus OX=10090 GN=Abi1 PE=1 SV=3	2	1	1	1	481	52.3	7.64
Q99LI8	Hgs	Chtop	Hepatocyte growth factor-regulated tyrosine kinase substrate OS=Mus musculus OX=10090 GN=Hgs PE=1 SV=2	1	1	1	1	775	86	6.16
Q61136	Prpf4b	Cp	Serine/threonine-protein kinase PRP4 homolog OS=Mus musculus OX=10090 GN=Prpf4b PE=1 SV=3	4	4	4	4	1007	116.9	10.23
O55091	Impact	Krt17	Protein IMPACT OS=Mus musculus OX=10090 GN=Impact PE=1 SV=2	12	3	3	3	318	36.3	5.05
P26043	Rdx	Serpinc1	Radixin OS=Mus musculus OX=10090 GN=Rdx PE=1 SV=3	20	14	14	3	583	68.5	6.2
Q61941	Nnt	Plec	NAD(P) transhydrogenase, mitochondrial OS=Mus musculus OX=10090 GN=Nnt PE=1 SV=2	5	4	4	4	1086	113.8	7.64
P32067	Ssb	H1-3	Lupus La protein homolog OS=Mus musculus OX=10090 GN=Ssb PE=1 SV=1	35	14	16	14	415	47.7	9.77
P51949	Mnat1	Ywhaz	CDK-activating kinase assembly factor MAT1 OS=Mus musculus OX=10090 GN=Mnat1 PE=1 SV=2	4	1	1	1	309	35.8	5.82
P25206	Mcm3	Psmb3	DNA replication licensing factor MCM3 OS=Mus musculus OX=10090 GN=Mcm3 PE=1 SV=2	16	10	12	10	812	91.5	5.55
Q9CRA5	Golph3	Rpl18	Golgi phosphoprotein 3 OS=Mus musculus OX=10090 GN=Golph3 PE=1 SV=1	5	1	1	1	298	33.7	6.44
Q9JIX8	Acin1	Rps16	Apoptotic chromatin condensation inducer in the nucleus OS=Mus musculus OX=10090 GN=Acin1 PE=1 SV=3	12	15	17	15	1338	150.6	5.91
E9Q7E2	Arid2	Tpm1	AT-rich interactive domain-containing protein 2 OS=Mus musculus OX=10090 GN=Arid2 PE=1 SV=1	1	2	2	2	1828	195.9	7.47
Q9DBR1	Xrn2	Nono	5'-3' exoribonuclease 2 OS=Mus musculus OX=10090 GN=Xrn2 PE=1 SV=1	4	4	4	4	951	108.6	7.59
Q8VCH6	Dhcr24	Vim	Delta(24)-sterol reductase OS=Mus musculus OX=10090 GN=Dhcr24 PE=1 SV=1	8	4	4	4	516	60.1	8.16
P61202	Cops2	Mybbp1a	COP9 signalosome complex subunit 2 OS=Mus musculus OX=10090 GN=Cops2 PE=1 SV=1	5	2	2	2	443	51.6	5.53
Q8BM55	Tmem214	Rpl35	Transmembrane protein 214 OS=Mus musculus OX=10090 GN=Tmem214 PE=1 SV=1	9	5	5	5	687	76.4	9.29
P17182	Eno1	H2bc7	Alpha-enolase OS=Mus musculus OX=10090 GN=Eno1 PE=1 SV=3	58	19	29	16	434	47.1	6.8
Q45VK7	Dync2h1	Myh10	Cytoplasmic dynein 2 heavy chain 1 OS=Mus musculus OX=10090 GN=Dync2h1 PE=1 SV=1	0	1	1	1	4306	492	6.6
Q9QY36	Naa10	Aldoa	N-alpha-acetyltransferase 10 OS=Mus musculus OX=10090 GN=Naa10 PE=1 SV=1	11	3	3	3	235	26.5	5.64
Q99J62	Rfc4	Rpl18a	Replication factor C subunit 4 OS=Mus musculus OX=10090 GN=Rfc4 PE=1 SV=1	21	7	7	7	364	39.8	6.7
Q6PE01	Snrnp40	S100a14	U5 small nuclear ribonucleoprotein 40 kDa protein OS=Mus musculus OX=10090 GN=Snrnp40 PE=1 SV=1	25	6	6	6	358	39.3	8.1
Q791V5	Mtch2		Mitochondrial carrier homolog 2 OS=Mus musculus OX=10090 GN=Mtch2 PE=1 SV=1	41	8	10	8	303	33.5	8.25
Q99PL7	Scd3		Acyl-CoA desaturase 3 OS=Mus musculus OX=10090 GN=Scd3 PE=1 SV=1	2	1	1	1	359	41.4	8.94
P49962	Srp9		Signal recognition particle 9 kDa protein OS=Mus musculus OX=10090 GN=Srp9 PE=1 SV=2	13	1	1	1	86	10.2	7.99
Q99P88	Nup155		Nuclear pore complex protein Nup155 OS=Mus musculus OX=10090 GN=Nup155 PE=1 SV=1	2	2	2	2	1391	155	6.15
Q99LP6	Grpel1		GrpE protein homolog 1, mitochondrial OS=Mus musculus OX=10090 GN=Grpel1 PE=1 SV=1	23	4	4	4	217	24.3	8.38
P61750	Arf4		ADP-ribosylation factor 4 OS=Mus musculus OX=10090 GN=Arf4 PE=1 SV=2	57	8	8	4	180	20.4	7.14
Q00547	Hmmr		Hyaluronan mediated motility receptor OS=Mus musculus OX=10090 GN=Hmmr PE=1 SV=4	3	1	1	1	794	91.7	5.52
O09110	Map2k3		Dual specificity mitogen-activated protein kinase kinase 3 OS=Mus musculus OX=10090 GN=Map2k3 PE=1 SV=2	2	1	1	1	347	39.3	7.43
Q3UNA4	Nxt2		NTF2-related export protein 2 OS=Mus musculus OX=10090 GN=Nxt2 PE=2 SV=1	5	1	1	1	142	16.2	5.81
Q3TRM4	Pnpla6		Patatin-like phospholipase domain-containing protein 6 OS=Mus musculus OX=10090 GN=Pnpla6 PE=1 SV=2	1	1	1	1	1355	149.4	7.83
P26443	Glud1		Glutamate dehydrogenase 1, mitochondrial OS=Mus musculus OX=10090 GN=Glud1 PE=1 SV=1	22	11	11	11	558	61.3	8
P63166	Sumo1		Small ubiquitin-related modifier 1 OS=Mus musculus OX=10090 GN=Sumo1 PE=1 SV=1	19	2	3	2	101	11.6	5.52
Q9D1R9	Rpl34		60S ribosomal protein L34 OS=Mus musculus OX=10090 GN=Rpl34 PE=1 SV=2	30	5	5	5	117	13.3	11.47
Q3UPF5	Zc3hav1		Zinc finger CCCH-type antiviral protein 1 OS=Mus musculus OX=10090 GN=Zc3hav1 PE=1 SV=1	1	1	1	1	946	106.6	8.27
A2AIV2	Virma		Protein virilizer homolog OS=Mus musculus OX=10090 GN=Virma PE=1 SV=1	1	2	2	2	1811	201.3	4.96
P09671	Sod2		Superoxide dismutase [Mn], mitochondrial OS=Mus musculus OX=10090 GN=Sod2 PE=1 SV=3	19	3	3	3	222	24.6	8.62
P24369	Ppib		Peptidyl-prolyl cis-trans isomerase B OS=Mus musculus OX=10090 GN=Ppib PE=1 SV=2	44	10	14	10	216	23.7	9.55
Q3THS6	Mat2a		S-adenosylmethionine synthase isoform type-2 OS=Mus musculus OX=10090 GN=Mat2a PE=1 SV=2	18	6	7	6	395	43.7	6.48
Q00899	Yy1		Transcriptional repressor protein YY1 OS=Mus musculus OX=10090 GN=Yy1 PE=1 SV=1	15	5	5	5	414	44.7	6.29
P37913	Lig1		DNA ligase 1 OS=Mus musculus OX=10090 GN=Lig1 PE=1 SV=2	4	3	3	3	916	102.2	6.81
P09411	Pgk1		Phosphoglycerate kinase 1 OS=Mus musculus OX=10090 GN=Pgk1 PE=1 SV=4	67	22	26	22	417	44.5	7.9
Q8R1G6	Pdlim2		PDZ and LIM domain protein 2 OS=Mus musculus OX=10090 GN=Pdlim2 PE=1 SV=1	6	2	2	2	349	37.7	8.7
Q99KP6	Prpf19		Pre-mRNA-processing factor 19 OS=Mus musculus OX=10090 GN=Prpf19 PE=1 SV=1	42	14	19	14	504	55.2	6.61
P62965	Crabp1		Cellular retinoic acid-binding protein 1 OS=Mus musculus OX=10090 GN=Crabp1 PE=1 SV=2	55	7	9	7	137	15.6	5.38
Q91VN4	Chchd6		MICOS complex subunit Mic25 OS=Mus musculus OX=10090 GN=Chchd6 PE=1 SV=2	6	1	1	1	273	29.8	8.41
Q99MJ9	Ddx50		ATP-dependent RNA helicase DDX50 OS=Mus musculus OX=10090 GN=Ddx50 PE=2 SV=1	1	1	1	1	734	82.1	9.25
Q3TW96	Uap1l1		UDP-N-acetylhexosamine pyrophosphorylase-like protein 1 OS=Mus musculus OX=10090 GN=Uap1l1 PE=1 SV=1	4	2	2	2	507	56.6	5.43
Q80WE4	Kif20b		Kinesin-like protein KIF20B OS=Mus musculus OX=10090 GN=Kif20b PE=1 SV=3	0	1	1	1	1774	203.4	5.78
Q9Z1Z2	Strap		Serine-threonine kinase receptor-associated protein OS=Mus musculus OX=10090 GN=Strap PE=1 SV=2	34	8	9	8	350	38.4	5.12
Q3UM18	Lsg1		Large subunit GTPase 1 homolog OS=Mus musculus OX=10090 GN=Lsg1 PE=1 SV=2	1	1	1	1	644	73.1	6.51
P47758	Srprb		Signal recognition particle receptor subunit beta OS=Mus musculus OX=10090 GN=Srprb PE=1 SV=1	39	8	8	8	269	29.6	9.28
P48036	Anxa5		Annexin A5 OS=Mus musculus OX=10090 GN=Anxa5 PE=1 SV=1	53	17	22	17	319	35.7	4.96
Q64520	Guk1		Guanylate kinase OS=Mus musculus OX=10090 GN=Guk1 PE=1 SV=2	5	1	1	1	198	21.9	6.55
P28658	Atxn10		Ataxin-10 OS=Mus musculus OX=10090 GN=Atxn10 PE=1 SV=2	24	9	9	9	475	53.7	5.25
Q8BRF7	Scfd1		Sec1 family domain-containing protein 1 OS=Mus musculus OX=10090 GN=Scfd1 PE=1 SV=1	4	2	2	2	639	72.3	6.38
Q60870	Reep5		Receptor expression-enhancing protein 5 OS=Mus musculus OX=10090 GN=Reep5 PE=1 SV=1	10	2	2	2	185	21	8.38
Q8BGB5	Limd2		LIM domain-containing protein 2 OS=Mus musculus OX=10090 GN=Limd2 PE=1 SV=1	27	3	5	3	128	14.2	9.04
Q9ESD6	Cmtm7		CKLF-like MARVEL transmembrane domain-containing protein 7 OS=Mus musculus OX=10090 GN=Cmtm7 PE=1 SV=1	5	1	1	1	167	18.1	7.74
Q9ERA6	Tfip11		Tuftelin-interacting protein 11 OS=Mus musculus OX=10090 GN=Tfip11 PE=1 SV=1	1	1	1	1	838	96.2	5.9
O88543	Cops3		COP9 signalosome complex subunit 3 OS=Mus musculus OX=10090 GN=Cops3 PE=1 SV=3	8	3	3	3	423	47.8	6.65
Q6ZWY3	Rps27l		40S ribosomal protein S27-like OS=Mus musculus OX=10090 GN=Rps27l PE=1 SV=3	38	3	4	1	84	9.5	9.45
Q9D0N7	Chaf1b		Chromatin assembly factor 1 subunit B OS=Mus musculus OX=10090 GN=Chaf1b PE=1 SV=1	4	2	2	2	572	63.1	6.55
P97496	Smarcc1		SWI/SNF complex subunit SMARCC1 OS=Mus musculus OX=10090 GN=Smarcc1 PE=1 SV=2	16	15	17	10	1104	122.8	5.73
P97434	Mprip		Myosin phosphatase Rho-interacting protein OS=Mus musculus OX=10090 GN=Mprip PE=1 SV=2	9	8	8	7	1024	116.3	6.21
Q8BFZ9	Erlin2		Erlin-2 OS=Mus musculus OX=10090 GN=Erlin2 PE=1 SV=1	20	7	7	4	340	37.8	5.5
Q91VX2	Ubap2		Ubiquitin-associated protein 2 OS=Mus musculus OX=10090 GN=Ubap2 PE=1 SV=1	2	2	2	2	1132	117.9	7.72
Q3UPL0	Sec31a		Protein transport protein Sec31A OS=Mus musculus OX=10090 GN=Sec31a PE=1 SV=2	4	4	4	4	1230	133.5	6.76
Q6NZN0	Rbm26		RNA-binding protein 26 OS=Mus musculus OX=10090 GN=Rbm26 PE=1 SV=2	4	4	4	4	1012	114.1	9.16
Q922J3	Clip1		CAP-Gly domain-containing linker protein 1 OS=Mus musculus OX=10090 GN=Clip1 PE=1 SV=1	2	3	3	3	1391	155.7	5.24
P47802	Mtx1		Metaxin-1 OS=Mus musculus OX=10090 GN=Mtx1 PE=1 SV=1	12	3	3	3	317	35.6	6.18
P61205	Arf3		ADP-ribosylation factor 3 OS=Mus musculus OX=10090 GN=Arf3 PE=2 SV=2	43	6	6	1	181	20.6	7.43
P57784	Snrpa1		U2 small nuclear ribonucleoprotein A' OS=Mus musculus OX=10090 GN=Snrpa1 PE=1 SV=2	25	5	6	5	255	28.3	8.62
Q64521	Gpd2		Glycerol-3-phosphate dehydrogenase, mitochondrial OS=Mus musculus OX=10090 GN=Gpd2 PE=1 SV=2	25	15	15	15	727	80.9	6.61
Q61753	Phgdh		D-3-phosphoglycerate dehydrogenase OS=Mus musculus OX=10090 GN=Phgdh PE=1 SV=3	17	8	8	8	533	56.5	6.54
P01831	Thy1		Thy-1 membrane glycoprotein OS=Mus musculus OX=10090 GN=Thy1 PE=1 SV=1	22	3	3	3	162	18.1	8.97
P37804	Tagln		Transgelin OS=Mus musculus OX=10090 GN=Tagln PE=1 SV=3	21	3	3	3	201	22.6	8.81
O35465	Fkbp8		Peptidyl-prolyl cis-trans isomerase FKBP8 OS=Mus musculus OX=10090 GN=Fkbp8 PE=1 SV=2	2	1	1	1	402	43.5	5.16
Q9QZ88	Vps29		Vacuolar protein sorting-associated protein 29 OS=Mus musculus OX=10090 GN=Vps29 PE=1 SV=1	10	2	2	2	182	20.5	6.79
Q9CQA3	Sdhb		Succinate dehydrogenase [ubiquinone] iron-sulfur subunit, mitochondrial OS=Mus musculus OX=10090 GN=Sdhb PE=1 SV=1	14	4	4	4	282	31.8	8.68
P13439	Umps		Uridine 5'-monophosphate synthase OS=Mus musculus OX=10090 GN=Umps PE=1 SV=3	3	2	2	2	481	52.3	6.61
Q9D3B1	Hacd2		Very-long-chain (3R)-3-hydroxyacyl-CoA dehydratase 2 OS=Mus musculus OX=10090 GN=Hacd2 PE=1 SV=1	7	2	2	2	254	28.4	9.58
O88662	Emp2		Epithelial membrane protein 2 OS=Mus musculus OX=10090 GN=Emp2 PE=1 SV=1	5	2	3	2	172	19.7	7.72
P62892	Rpl39		60S ribosomal protein L39 OS=Mus musculus OX=10090 GN=Rpl39 PE=1 SV=2	20	1	1	1	51	6.4	12.56
Q62446	Fkbp3		Peptidyl-prolyl cis-trans isomerase FKBP3 OS=Mus musculus OX=10090 GN=Fkbp3 PE=1 SV=2	56	11	11	11	224	25.1	9.28
P14404	Mecom		Histone-lysine N-methyltransferase MECOM OS=Mus musculus OX=10090 GN=Mecom PE=1 SV=2	1	1	1	1	1232	138	6.35
Q61335	Bcap31		B-cell receptor-associated protein 31 OS=Mus musculus OX=10090 GN=Bcap31 PE=1 SV=4	18	4	4	4	245	27.9	8.7
P48962	Slc25a4		ADP/ATP translocase 1 OS=Mus musculus OX=10090 GN=Slc25a4 PE=1 SV=4	60	19	29	9	298	32.9	9.72
O88342	Wdr1		WD repeat-containing protein 1 OS=Mus musculus OX=10090 GN=Wdr1 PE=1 SV=3	17	7	7	7	606	66.4	6.6
Q7TNV0	Dek		Protein DEK OS=Mus musculus OX=10090 GN=Dek PE=1 SV=1	17	6	7	6	380	43.1	6.86
Q9EQ61	Pes1		Pescadillo homolog OS=Mus musculus OX=10090 GN=Pes1 PE=1 SV=1	3	2	2	2	584	67.8	6.84
P63028	Tpt1		Translationally-controlled tumor protein OS=Mus musculus OX=10090 GN=Tpt1 PE=1 SV=1	33	5	9	5	172	19.5	4.86
Q9CPY7	Lap3		Cytosol aminopeptidase OS=Mus musculus OX=10090 GN=Lap3 PE=1 SV=3	8	3	3	3	519	56.1	7.72
P35456	Plaur		Urokinase plasminogen activator surface receptor OS=Mus musculus OX=10090 GN=Plaur PE=1 SV=1	5	1	1	1	327	35.4	6.83
P62869	Elob		Elongin-B OS=Mus musculus OX=10090 GN=Elob PE=1 SV=1	29	5	7	5	118	13.2	5.01
O08663	Metap2		Methionine aminopeptidase 2 OS=Mus musculus OX=10090 GN=Metap2 PE=1 SV=1	8	3	3	3	478	52.9	5.82
Q9JKX4	Aatf		Protein AATF OS=Mus musculus OX=10090 GN=Aatf PE=1 SV=1	2	1	1	1	526	59.4	4.93
Q6DFV1	Ncapg2		Condensin-2 complex subunit G2 OS=Mus musculus OX=10090 GN=Ncapg2 PE=1 SV=2	1	1	1	1	1138	130.8	6.93
Q3U0V1	Khsrp		Far upstream element-binding protein 2 OS=Mus musculus OX=10090 GN=Khsrp PE=1 SV=2	40	24	30	22	748	76.7	7.33
Q8VIJ6	Sfpq		Splicing factor, proline- and glutamine-rich OS=Mus musculus OX=10090 GN=Sfpq PE=1 SV=1	36	26	44	25	699	75.4	9.44
Q9Z103	Adnp		Activity-dependent neuroprotector homeobox protein OS=Mus musculus OX=10090 GN=Adnp PE=1 SV=2	1	1	1	1	1108	124.2	6.86
Q9CPU0	Glo1		Lactoylglutathione lyase OS=Mus musculus OX=10090 GN=Glo1 PE=1 SV=3	5	1	1	1	184	20.8	5.47
Q9DC23	Dnajc10		DnaJ homolog subfamily C member 10 OS=Mus musculus OX=10090 GN=Dnajc10 PE=1 SV=2	4	3	3	3	793	90.5	6.96
Q99J47	Dhrs7b		Dehydrogenase/reductase SDR family member 7B OS=Mus musculus OX=10090 GN=Dhrs7b PE=1 SV=1	7	2	2	2	323	35	9.63
Q64012	Raly		RNA-binding protein Raly OS=Mus musculus OX=10090 GN=Raly PE=1 SV=3	22	6	7	6	312	33.2	8.84
Q99JX7	Nxf1		Nuclear RNA export factor 1 OS=Mus musculus OX=10090 GN=Nxf1 PE=1 SV=3	14	7	7	7	618	70.3	8.73
Q9JII5	Dazap1		DAZ-associated protein 1 OS=Mus musculus OX=10090 GN=Dazap1 PE=1 SV=2	14	3	4	3	406	43.2	8.56
Q9CQX8	Mrps36		Alpha-ketoglutarate dehydrogenase component 4 OS=Mus musculus OX=10090 GN=Mrps36 PE=1 SV=1	13	1	1	1	102	11.1	9.99
Q99L04	Dhrs1		Dehydrogenase/reductase SDR family member 1 OS=Mus musculus OX=10090 GN=Dhrs1 PE=1 SV=1	4	1	1	1	313	34	8.35
Q9JM76	Arpc3		Actin-related protein 2/3 complex subunit 3 OS=Mus musculus OX=10090 GN=Arpc3 PE=1 SV=3	28	5	6	5	178	20.5	8.59
Q9JHU4	Dync1h1		Cytoplasmic dynein 1 heavy chain 1 OS=Mus musculus OX=10090 GN=Dync1h1 PE=1 SV=2	16	64	64	64	4644	531.7	6.42
P11862	Gas2		Growth arrest-specific protein 2 OS=Mus musculus OX=10090 GN=Gas2 PE=1 SV=1	13	3	3	3	314	34.9	8.57
Q8R1I1	Uqcr10		Cytochrome b-c1 complex subunit 9 OS=Mus musculus OX=10090 GN=Uqcr10 PE=1 SV=1	38	2	2	2	64	7.4	9.19
Q8CCF0	Prpf31		U4/U6 small nuclear ribonucleoprotein Prp31 OS=Mus musculus OX=10090 GN=Prpf31 PE=1 SV=3	12	4	4	4	499	55.4	5.67
P39054	Dnm2		Dynamin-2 OS=Mus musculus OX=10090 GN=Dnm2 PE=1 SV=2	8	7	7	3	870	98.1	7.43
Q9CPU4	Mgst3		Microsomal glutathione S-transferase 3 OS=Mus musculus OX=10090 GN=Mgst3 PE=1 SV=1	8	1	1	1	153	16.9	9.5
P70699	Gaa		Lysosomal alpha-glucosidase OS=Mus musculus OX=10090 GN=Gaa PE=1 SV=2	3	3	4	3	953	106.2	5.83
Q9R1T2	Sae1		SUMO-activating enzyme subunit 1 OS=Mus musculus OX=10090 GN=Sae1 PE=1 SV=1	22	7	7	7	350	38.6	5.36
P58252	Eef2		Elongation factor 2 OS=Mus musculus OX=10090 GN=Eef2 PE=1 SV=2	47	33	43	32	858	95.3	6.83
Q9CQE8	RTRAF		RNA transcription, translation and transport factor protein OS=Mus musculus OX=10090 GN=RTRAF PE=1 SV=1	27	6	6	6	244	28.1	6.89
Q8C181	Mbnl2		Muscleblind-like protein 2 OS=Mus musculus OX=10090 GN=Mbnl2 PE=2 SV=2	2	1	1	1	373	40.1	9
Q99LD4	Gps1		COP9 signalosome complex subunit 1 OS=Mus musculus OX=10090 GN=Gps1 PE=1 SV=1	6	2	2	2	471	53.4	6.84
Q91YR7	Prpf6		Pre-mRNA-processing factor 6 OS=Mus musculus OX=10090 GN=Prpf6 PE=1 SV=1	12	11	11	11	941	106.7	8.09
Q8BZQ7	Anapc2		Anaphase-promoting complex subunit 2 OS=Mus musculus OX=10090 GN=Anapc2 PE=1 SV=2	1	1	1	1	837	95.2	5.31
P18406	Ccn1		CCN family member 1 OS=Mus musculus OX=10090 GN=Ccn1 PE=1 SV=1	7	3	3	3	379	41.7	8.12
B2RY56	Rbm25		RNA-binding protein 25 OS=Mus musculus OX=10090 GN=Rbm25 PE=1 SV=2	18	13	13	13	838	99.5	6.32
Q9JKV1	Adrm1		Proteasomal ubiquitin receptor ADRM1 OS=Mus musculus OX=10090 GN=Adrm1 PE=1 SV=2	4	1	1	1	407	42	5.07
P49586	Pcyt1a		Choline-phosphate cytidylyltransferase A OS=Mus musculus OX=10090 GN=Pcyt1a PE=1 SV=1	6	2	2	2	367	41.6	7.03
Q8C878	Uba3		NEDD8-activating enzyme E1 catalytic subunit OS=Mus musculus OX=10090 GN=Uba3 PE=1 SV=2	2	1	1	1	462	51.7	5.45
P14206	Rpsa		40S ribosomal protein SA OS=Mus musculus OX=10090 GN=Rpsa PE=1 SV=4	44	11	15	11	295	32.8	4.87
Q9JKC8	Ap3m1		AP-3 complex subunit mu-1 OS=Mus musculus OX=10090 GN=Ap3m1 PE=1 SV=1	5	2	2	2	418	46.9	6.93
Q9CQM5	Txndc17		Thioredoxin domain-containing protein 17 OS=Mus musculus OX=10090 GN=Txndc17 PE=1 SV=1	11	1	1	1	123	14	4.77
Q9R0Q9	Mpdu1		Mannose-P-dolichol utilization defect 1 protein OS=Mus musculus OX=10090 GN=Mpdu1 PE=1 SV=1	4	1	1	1	247	26.5	8.75
Q7TMM9	Tubb2a		Tubulin beta-2A chain OS=Mus musculus OX=10090 GN=Tubb2a PE=1 SV=1	47	15	29	1	445	49.9	4.89
Q8BH69	Sephs1		Selenide, water dikinase 1 OS=Mus musculus OX=10090 GN=Sephs1 PE=1 SV=1	4	1	1	1	392	42.9	5.97
P10852	Slc3a2		4F2 cell-surface antigen heavy chain OS=Mus musculus OX=10090 GN=Slc3a2 PE=1 SV=1	6	4	4	4	526	58.3	5.91
Q8BHS3	Rbm22		Pre-mRNA-splicing factor RBM22 OS=Mus musculus OX=10090 GN=Rbm22 PE=1 SV=1	5	2	2	2	420	46.9	8.54
Q61263	Soat1		Sterol O-acyltransferase 1 OS=Mus musculus OX=10090 GN=Soat1 PE=1 SV=2	5	2	2	2	540	63.8	9.01
Q8BVE3	Atp6v1h		V-type proton ATPase subunit H OS=Mus musculus OX=10090 GN=Atp6v1h PE=1 SV=1	4	2	2	2	483	55.8	6.61
Q9R0P5	Dstn		Destrin OS=Mus musculus OX=10090 GN=Dstn PE=1 SV=3	52	8	9	7	165	18.5	7.97
Q3V1T4	P3h1		Prolyl 3-hydroxylase 1 OS=Mus musculus OX=10090 GN=P3h1 PE=1 SV=2	1	1	1	1	739	83.6	5.14
Q9D0M3	Cyc1		Cytochrome c1, heme protein, mitochondrial OS=Mus musculus OX=10090 GN=Cyc1 PE=1 SV=1	23	5	6	5	325	35.3	9.16
Q8BXV2	Bri3bp		BRI3-binding protein OS=Mus musculus OX=10090 GN=Bri3bp PE=1 SV=1	4	1	1	1	253	28.2	9.52
Q9CX56	Psmd8		26S proteasome non-ATPase regulatory subunit 8 OS=Mus musculus OX=10090 GN=Psmd8 PE=1 SV=2	12	4	4	4	353	39.9	9.58
Q6P5F9	Xpo1		Exportin-1 OS=Mus musculus OX=10090 GN=Xpo1 PE=1 SV=1	13	12	12	12	1071	123	6.07
Q8K4R9	Dlgap5		Disks large-associated protein 5 OS=Mus musculus OX=10090 GN=Dlgap5 PE=1 SV=2	1	1	1	1	808	90.1	9.17
Q9R1J0	Nsdhl		Sterol-4-alpha-carboxylate 3-dehydrogenase, decarboxylating OS=Mus musculus OX=10090 GN=Nsdhl PE=1 SV=1	14	3	3	3	362	40.7	7.85
Q91VH2	Snx9		Sorting nexin-9 OS=Mus musculus OX=10090 GN=Snx9 PE=1 SV=1	4	2	2	2	595	66.5	5.52
Q01853	Vcp		Transitional endoplasmic reticulum ATPase OS=Mus musculus OX=10090 GN=Vcp PE=1 SV=4	49	33	40	33	806	89.3	5.26
O35643	Ap1b1		AP-1 complex subunit beta-1 OS=Mus musculus OX=10090 GN=Ap1b1 PE=1 SV=2	10	8	10	1	943	103.9	5.17
G3X9J0	Sipa1l3		Signal-induced proliferation-associated 1-like protein 3 OS=Mus musculus OX=10090 GN=Sipa1l3 PE=1 SV=1	1	2	2	2	1776	194.9	8.32
Q91ZV0	Mia2		Melanoma inhibitory activity protein 2 OS=Mus musculus OX=10090 GN=Mia2 PE=1 SV=3	1	1	1	1	1396	156.4	4.55
Q6DVA0	Lemd2		LEM domain-containing protein 2 OS=Mus musculus OX=10090 GN=Lemd2 PE=1 SV=1	10	4	4	4	511	57.5	9.01
P23116	Eif3a		Eukaryotic translation initiation factor 3 subunit A OS=Mus musculus OX=10090 GN=Eif3a PE=1 SV=5	26	36	38	36	1344	161.8	6.77
Q9CQQ7	Atp5pb		ATP synthase F(0) complex subunit B1, mitochondrial OS=Mus musculus OX=10090 GN=Atp5pb PE=1 SV=1	14	4	4	4	256	28.9	9.06
Q6P4T2	Snrnp200		U5 small nuclear ribonucleoprotein 200 kDa helicase OS=Mus musculus OX=10090 GN=Snrnp200 PE=1 SV=1	21	35	36	35	2136	244.4	6.06
P55302	Lrpap1		Alpha-2-macroglobulin receptor-associated protein OS=Mus musculus OX=10090 GN=Lrpap1 PE=1 SV=1	2	1	1	1	360	42.2	7.87
Q64105	Spr		Sepiapterin reductase OS=Mus musculus OX=10090 GN=Spr PE=1 SV=1	6	1	1	1	261	27.9	5.74
Q61550	Rad21		Double-strand-break repair protein rad21 homolog OS=Mus musculus OX=10090 GN=Rad21 PE=1 SV=3	8	5	5	5	635	72	4.64
Q8BWT5	Dip2a		Disco-interacting protein 2 homolog A OS=Mus musculus OX=10090 GN=Dip2a PE=1 SV=3	0	1	1	1	1523	165.1	7.61
Q9ESU6	Brd4		Bromodomain-containing protein 4 OS=Mus musculus OX=10090 GN=Brd4 PE=1 SV=2	6	8	9	7	1400	155.8	9.19
Q07076	Anxa7		Annexin A7 OS=Mus musculus OX=10090 GN=Anxa7 PE=1 SV=2	27	11	11	11	463	49.9	6.18
P26041	Msn		Moesin OS=Mus musculus OX=10090 GN=Msn PE=1 SV=3	32	23	23	12	577	67.7	6.6
O55047	Tlk2		Serine/threonine-protein kinase tousled-like 2 OS=Mus musculus OX=10090 GN=Tlk2 PE=1 SV=2	2	1	1	1	718	82.2	8.27
P68510	Ywhah		14-3-3 protein eta OS=Mus musculus OX=10090 GN=Ywhah PE=1 SV=2	30	7	8	5	246	28.2	4.89
O08553	Dpysl2		Dihydropyrimidinase-related protein 2 OS=Mus musculus OX=10090 GN=Dpysl2 PE=1 SV=2	28	11	11	10	572	62.2	6.38
Q3TIV5	Zc3h15		Zinc finger CCCH domain-containing protein 15 OS=Mus musculus OX=10090 GN=Zc3h15 PE=1 SV=2	10	4	4	4	426	48.3	5.3
Q8BJU0	Sgta		Small glutamine-rich tetratricopeptide repeat-containing protein alpha OS=Mus musculus OX=10090 GN=Sgta PE=1 SV=2	3	1	1	1	315	34.3	5.06
Q91WN1	Dnajc9		DnaJ homolog subfamily C member 9 OS=Mus musculus OX=10090 GN=Dnajc9 PE=1 SV=2	7	2	2	2	259	30	5.94
P11031	Sub1		Activated RNA polymerase II transcriptional coactivator p15 OS=Mus musculus OX=10090 GN=Sub1 PE=1 SV=3	34	4	5	4	127	14.4	9.6
Q8K0C4	Cyp51a1		Lanosterol 14-alpha demethylase OS=Mus musculus OX=10090 GN=Cyp51a1 PE=1 SV=1	26	11	12	11	503	56.7	8.41
Q3U7R1	Esyt1		Extended synaptotagmin-1 OS=Mus musculus OX=10090 GN=Esyt1 PE=1 SV=2	2	2	2	2	1092	121.5	5.95
Q9CQM9	Glrx3		Glutaredoxin-3 OS=Mus musculus OX=10090 GN=Glrx3 PE=1 SV=1	17	5	5	5	337	37.8	5.59
Q9EPU0	Upf1		Regulator of nonsense transcripts 1 OS=Mus musculus OX=10090 GN=Upf1 PE=1 SV=2	8	8	8	8	1124	123.9	6.61
Q9CQH7	Btf3l4		Transcription factor BTF3 homolog 4 OS=Mus musculus OX=10090 GN=Btf3l4 PE=1 SV=1	10	1	1	1	158	17.3	6.35
O08795	Prkcsh		Glucosidase 2 subunit beta OS=Mus musculus OX=10090 GN=Prkcsh PE=1 SV=1	13	7	7	7	521	58.8	4.46
Q922S8	Kif2c		Kinesin-like protein KIF2C OS=Mus musculus OX=10090 GN=Kif2c PE=1 SV=1	3	2	2	2	721	81	7.97
Q8BG51	Rhot1		Mitochondrial Rho GTPase 1 OS=Mus musculus OX=10090 GN=Rhot1 PE=1 SV=1	3	2	2	2	631	72.2	6.49
Q9D8B3	Chmp4b		Charged multivesicular body protein 4b OS=Mus musculus OX=10090 GN=Chmp4b PE=1 SV=2	11	2	2	2	224	24.9	4.82
Q91YK2	Rrp1b		Ribosomal RNA processing protein 1 homolog B OS=Mus musculus OX=10090 GN=Rrp1b PE=1 SV=2	8	5	5	5	724	80.5	9.72
Q9Z1D1	Eif3g		Eukaryotic translation initiation factor 3 subunit G OS=Mus musculus OX=10090 GN=Eif3g PE=1 SV=2	16	4	4	4	320	35.6	5.9
Q8BSQ9	Pbrm1		Protein polybromo-1 OS=Mus musculus OX=10090 GN=Pbrm1 PE=1 SV=4	1	1	1	1	1634	187.1	6.9
P09528	Fth1		Ferritin heavy chain OS=Mus musculus OX=10090 GN=Fth1 PE=1 SV=2	15	3	3	3	182	21.1	5.88
P0C0S6	H2az1		Histone H2A.Z OS=Mus musculus OX=10090 GN=H2az1 PE=1 SV=2	43	4	4	2	128	13.5	10.58
O54724	Cavin1		Caveolae-associated protein 1 OS=Mus musculus OX=10090 GN=Cavin1 PE=1 SV=1	50	17	33	17	392	43.9	5.52
P62320	Snrpd3		Small nuclear ribonucleoprotein Sm D3 OS=Mus musculus OX=10090 GN=Snrpd3 PE=1 SV=1	40	3	6	3	126	13.9	10.32
Q99L28	Rsl24d1		Probable ribosome biogenesis protein RLP24 OS=Mus musculus OX=10090 GN=Rsl24d1 PE=2 SV=1	7	1	1	1	163	19.6	9.98
A2AFR3	Frmpd4		FERM and PDZ domain-containing protein 4 OS=Mus musculus OX=10090 GN=Frmpd4 PE=1 SV=1	1	1	1	1	1320	144.9	5.25
Q9QZB7	Actr10		Actin-related protein 10 OS=Mus musculus OX=10090 GN=Actr10 PE=1 SV=2	3	1	1	1	417	46.2	7.61
P63087	Ppp1cc		Serine/threonine-protein phosphatase PP1-gamma catalytic subunit OS=Mus musculus OX=10090 GN=Ppp1cc PE=1 SV=1	31	8	11	2	323	37	6.54
P08556	Nras		GTPase NRas OS=Mus musculus OX=10090 GN=Nras PE=1 SV=1	12	2	2	2	189	21.2	5.17
Q9Z1N7	Arid3b		AT-rich interactive domain-containing protein 3B OS=Mus musculus OX=10090 GN=Arid3b PE=1 SV=1	1	1	1	1	568	61	7.47
P00405	Mtco2		Cytochrome c oxidase subunit 2 OS=Mus musculus OX=10090 GN=Mtco2 PE=1 SV=1	44	6	9	6	227	26	4.73
P52293	Kpna2		Importin subunit alpha-1 OS=Mus musculus OX=10090 GN=Kpna2 PE=1 SV=2	27	13	15	13	529	57.9	5.68
Q9DAR7	Dcps		m7GpppX diphosphatase OS=Mus musculus OX=10090 GN=Dcps PE=1 SV=1	6	1	1	1	338	39	6.48
Q8JZK9	Hmgcs1		Hydroxymethylglutaryl-CoA synthase, cytoplasmic OS=Mus musculus OX=10090 GN=Hmgcs1 PE=1 SV=1	10	5	5	5	520	57.5	5.99
Q9WV71	Asb4		Ankyrin repeat and SOCS box protein 4 OS=Mus musculus OX=10090 GN=Asb4 PE=1 SV=1	3	1	1	1	426	48.1	7.52
Q08775	Runx1		Runt-related transcription factor 2 OS=Mus musculus OX=10090 GN=Runx2 PE=1 SV=2	3	2	2	2	607	66.2	9.29
Q3UD01	Atxn7l3b		Ataxin-7-like protein 3B OS=Mus musculus OX=10090 GN=Atxn7l3b PE=1 SV=1	10	1	1	1	97	10.7	4.32
Q61699	Hsph1		Heat shock protein 105 kDa OS=Mus musculus OX=10090 GN=Hsph1 PE=1 SV=2	14	11	12	10	858	96.3	5.53
Q8VDN2	Atp1a1		Sodium/potassium-transporting ATPase subunit alpha-1 OS=Mus musculus OX=10090 GN=Atp1a1 PE=1 SV=1	14	13	13	13	1023	112.9	5.45
Q61768	Kif5b		Kinesin-1 heavy chain OS=Mus musculus OX=10090 GN=Kif5b PE=1 SV=3	6	4	5	4	963	109.5	6.44
Q3UMY5	Eml4		Echinoderm microtubule-associated protein-like 4 OS=Mus musculus OX=10090 GN=Eml4 PE=1 SV=1	2	1	1	1	988	110	6.54
Q9R0H5	Krt71		Keratin, type II cytoskeletal 71 OS=Mus musculus OX=10090 GN=Krt71 PE=1 SV=1	6	3	4	1	524	57.3	6.99
P14211	Calr		Calreticulin OS=Mus musculus OX=10090 GN=Calr PE=1 SV=1	43	16	23	16	416	48	4.49
Q9CQ49	Ncbp2		Nuclear cap-binding protein subunit 2 OS=Mus musculus OX=10090 GN=Ncbp2 PE=1 SV=1	7	1	1	1	156	18	7.81
P46978	Stt3a		Dolichyl-diphosphooligosaccharide--protein glycosyltransferase subunit STT3A OS=Mus musculus OX=10090 GN=Stt3a PE=1 SV=1	9	7	8	6	705	80.5	8.1
P02301	H3-5		Histone H3.3C OS=Mus musculus OX=10090 GN=H3-5 PE=3 SV=3	40	4	4	1	136	15.3	11.14
Q9DCX2	Atp5pd		ATP synthase subunit d, mitochondrial OS=Mus musculus OX=10090 GN=Atp5pd PE=1 SV=3	61	7	9	7	161	18.7	5.69
Q8R070	Slc37a1		Glucose-6-phosphate exchanger SLC37A1 OS=Mus musculus OX=10090 GN=Slc37a1 PE=2 SV=1	1	1	1	1	531	57.3	8.09
Q9Z2U0	Psma7		Proteasome subunit alpha type-7 OS=Mus musculus OX=10090 GN=Psma7 PE=1 SV=1	25	5	7	5	248	27.8	8.46
Q61074	Ppm1g		Protein phosphatase 1G OS=Mus musculus OX=10090 GN=Ppm1g PE=1 SV=3	1	1	1	1	542	58.7	4.39
Q9WUR2	Eci2		Enoyl-CoA delta isomerase 2 OS=Mus musculus OX=10090 GN=Eci2 PE=1 SV=2	2	1	1	1	391	43.2	8.92
P97384	Anxa11		Annexin A11 OS=Mus musculus OX=10090 GN=Anxa11 PE=1 SV=2	26	12	13	11	503	54	7.66
Q9CZ83	Mrpl55		39S ribosomal protein L55, mitochondrial OS=Mus musculus OX=10090 GN=Mrpl55 PE=1 SV=1	6	1	1	1	127	15.1	10.51
Q8BHJ9	Slu7		Pre-mRNA-splicing factor SLU7 OS=Mus musculus OX=10090 GN=Slu7 PE=1 SV=1	2	1	1	1	585	68	7.08
Q9JKY0	Cnot9		CCR4-NOT transcription complex subunit 9 OS=Mus musculus OX=10090 GN=Cnot9 PE=1 SV=1	13	4	4	4	299	33.6	8.03
P35486	Pdha1		Pyruvate dehydrogenase E1 component subunit alpha, somatic form, mitochondrial OS=Mus musculus OX=10090 GN=Pdha1 PE=1 SV=1	11	4	4	4	390	43.2	8.19
Q01730	Rsu1		Ras suppressor protein 1 OS=Mus musculus OX=10090 GN=Rsu1 PE=1 SV=3	13	4	4	4	277	31.5	8.88
Q9JIW9	Ralb		Ras-related protein Ral-B OS=Mus musculus OX=10090 GN=Ralb PE=1 SV=1	7	2	2	1	206	23.3	6.62
P97300	Nptn		Neuroplastin OS=Mus musculus OX=10090 GN=Nptn PE=1 SV=3	3	1	1	1	397	44.3	7.74
P68254	Ywhaq		14-3-3 protein theta OS=Mus musculus OX=10090 GN=Ywhaq PE=1 SV=1	54	12	14	8	245	27.8	4.78
Q99LC8	Eif2b1		Translation initiation factor eIF-2B subunit alpha OS=Mus musculus OX=10090 GN=Eif2b1 PE=1 SV=1	5	1	1	1	305	33.8	8.32
P08228	Sod1		Superoxide dismutase [Cu-Zn] OS=Mus musculus OX=10090 GN=Sod1 PE=1 SV=2	43	6	8	6	154	15.9	6.51
Q8BU88	Mrpl22		39S ribosomal protein L22, mitochondrial OS=Mus musculus OX=10090 GN=Mrpl22 PE=1 SV=1	6	1	1	1	206	23.8	9.86
Q9QYS9	Qki		KH domain-containing RNA-binding protein QKI OS=Mus musculus OX=10090 GN=Qki PE=1 SV=1	9	3	3	3	341	37.6	8.56
Q9CYI4	Luc7l		Putative RNA-binding protein Luc7-like 1 OS=Mus musculus OX=10090 GN=Luc7l PE=1 SV=2	27	9	10	4	371	43.9	9.88
P62071	Rras2		Ras-related protein R-Ras2 OS=Mus musculus OX=10090 GN=Rras2 PE=1 SV=1	6	1	1	1	204	23.4	6.01
Q9D8N0	Eef1g		Elongation factor 1-gamma OS=Mus musculus OX=10090 GN=Eef1g PE=1 SV=3	53	20	29	20	437	50	6.74
Q60737	Csnk2a1		Casein kinase II subunit alpha OS=Mus musculus OX=10090 GN=Csnk2a1 PE=1 SV=2	16	5	6	5	391	45.1	7.74
Q61792	Lasp1		LIM and SH3 domain protein 1 OS=Mus musculus OX=10090 GN=Lasp1 PE=1 SV=1	29	7	7	7	263	30	7.05
O70400	Pdlim1		PDZ and LIM domain protein 1 OS=Mus musculus OX=10090 GN=Pdlim1 PE=1 SV=4	8	2	2	2	327	35.8	6.84
Q8BKG3	Ptk7		Inactive tyrosine-protein kinase 7 OS=Mus musculus OX=10090 GN=Ptk7 PE=1 SV=1	1	1	1	1	1062	117.5	6.84
P70245	Ebp		3-beta-hydroxysteroid-Delta(8),Delta(7)-isomerase OS=Mus musculus OX=10090 GN=Ebp PE=1 SV=3	5	1	1	1	230	26.2	7.56
Q61048	Wbp4		WW domain-binding protein 4 OS=Mus musculus OX=10090 GN=Wbp4 PE=1 SV=4	3	1	1	1	376	42.1	7.36
Q08943	Ssrp1		FACT complex subunit SSRP1 OS=Mus musculus OX=10090 GN=Ssrp1 PE=1 SV=2	11	7	7	7	708	80.8	6.76
Q9CQI7	Snrpb2		U2 small nuclear ribonucleoprotein B'' OS=Mus musculus OX=10090 GN=Snrpb2 PE=1 SV=1	14	4	4	2	225	25.3	9.72
Q9CQ80	Vps25		Vacuolar protein-sorting-associated protein 25 OS=Mus musculus OX=10090 GN=Vps25 PE=1 SV=1	6	1	1	1	176	20.7	6.34
O08585	Clta		Clathrin light chain A OS=Mus musculus OX=10090 GN=Clta PE=1 SV=2	26	8	8	8	235	25.6	4.58
Q9CQE3	Mrps17		28S ribosomal protein S17, mitochondrial OS=Mus musculus OX=10090 GN=Mrps17 PE=1 SV=1	15	2	2	2	120	13.4	9.89
Q8K4Z5	Sf3a1		Splicing factor 3A subunit 1 OS=Mus musculus OX=10090 GN=Sf3a1 PE=1 SV=1	24	14	15	14	791	88.5	5.22
Q9ER88	Dap3		28S ribosomal protein S29, mitochondrial OS=Mus musculus OX=10090 GN=Dap3 PE=1 SV=1	10	3	3	3	391	44.7	8.94
Q8R0X7	Sgpl1		Sphingosine-1-phosphate lyase 1 OS=Mus musculus OX=10090 GN=Sgpl1 PE=1 SV=1	12	7	7	7	568	63.6	9.1
O88286	Wiz		Protein Wiz OS=Mus musculus OX=10090 GN=Wiz PE=1 SV=2	1	1	1	1	1684	184.2	7.01
P50580	Pa2g4		Proliferation-associated protein 2G4 OS=Mus musculus OX=10090 GN=Pa2g4 PE=1 SV=3	52	17	25	17	394	43.7	6.86
Q8BLN5	Lss		Lanosterol synthase OS=Mus musculus OX=10090 GN=Lss PE=1 SV=2	6	4	4	4	733	83.1	6.4
Q91YH5	Atl3		Atlastin-3 OS=Mus musculus OX=10090 GN=Atl3 PE=1 SV=1	9	4	4	4	541	60.5	6.1
Q62036	Cep131		Centrosomal protein of 131 kDa OS=Mus musculus OX=10090 GN=Cep131 PE=1 SV=2	1	1	1	1	1060	120.2	8.72
Q3URQ0	Tex10		Testis-expressed protein 10 OS=Mus musculus OX=10090 GN=Tex10 PE=1 SV=1	8	5	5	5	928	105.1	9.16
Q9CXE7	Tmed5		Transmembrane emp24 domain-containing protein 5 OS=Mus musculus OX=10090 GN=Tmed5 PE=1 SV=1	5	1	1	1	229	26.2	4.93
Q78PY7	Snd1		Staphylococcal nuclease domain-containing protein 1 OS=Mus musculus OX=10090 GN=Snd1 PE=1 SV=1	51	35	41	35	910	102	7.43
Q76KJ5	Polr1g		DNA-directed RNA polymerase I subunit RPA34 OS=Mus musculus OX=10090 GN=Polr1g PE=1 SV=2	4	1	1	1	399	43.1	9.61
P17751	Tpi1		Triosephosphate isomerase OS=Mus musculus OX=10090 GN=Tpi1 PE=1 SV=5	61	13	18	13	249	26.7	7.3
Q9CXK8	Nip7		60S ribosome subunit biogenesis protein NIP7 homolog OS=Mus musculus OX=10090 GN=Nip7 PE=1 SV=1	11	1	1	1	180	20.4	8.24
P31786	Dbi		Acyl-CoA-binding protein OS=Mus musculus OX=10090 GN=Dbi PE=1 SV=2	39	2	2	2	87	10	8.82
P51660	Hsd17b4		Peroxisomal multifunctional enzyme type 2 OS=Mus musculus OX=10090 GN=Hsd17b4 PE=1 SV=3	14	7	7	7	735	79.4	8.57
P61620	Sec61a1		Protein transport protein Sec61 subunit alpha isoform 1 OS=Mus musculus OX=10090 GN=Sec61a1 PE=1 SV=2	6	3	3	3	476	52.2	8.06
Q93092	Taldo1		Transaldolase OS=Mus musculus OX=10090 GN=Taldo1 PE=1 SV=2	31	11	12	11	337	37.4	7.03
Q91WK5	Gcsh		Glycine cleavage system H protein, mitochondrial OS=Mus musculus OX=10090 GN=Gcsh PE=1 SV=2	6	1	1	1	170	18.6	4.75
Q9WVM1	Racgap1		Rac GTPase-activating protein 1 OS=Mus musculus OX=10090 GN=Racgap1 PE=1 SV=1	3	1	1	1	628	70.1	8.51
O88587	Comt		Catechol O-methyltransferase OS=Mus musculus OX=10090 GN=Comt PE=1 SV=2	8	2	2	2	265	29.5	5.83
Q6NZB0	Dnajc8		DnaJ homolog subfamily C member 8 OS=Mus musculus OX=10090 GN=Dnajc8 PE=1 SV=2	14	4	4	4	253	29.8	9.06
Q8VEE4	Rpa1		Replication protein A 70 kDa DNA-binding subunit OS=Mus musculus OX=10090 GN=Rpa1 PE=1 SV=1	6	3	3	3	623	69	7.91
Q9D8W5	Psmd12		26S proteasome non-ATPase regulatory subunit 12 OS=Mus musculus OX=10090 GN=Psmd12 PE=1 SV=4	11	5	5	5	456	52.9	7.06
Q6P9J9	Ano6		Anoctamin-6 OS=Mus musculus OX=10090 GN=Ano6 PE=1 SV=1	2	1	1	1	911	106.2	6.76
P56959	Fus		RNA-binding protein FUS OS=Mus musculus OX=10090 GN=Fus PE=1 SV=1	16	8	11	8	518	52.6	9.36
P63271	Supt4h1a		Transcription elongation factor SPT4-A OS=Mus musculus OX=10090 GN=Supt4h1a PE=2 SV=1	8	1	1	1	117	13.2	8.06
P10649	Gstm1		Glutathione S-transferase Mu 1 OS=Mus musculus OX=10090 GN=Gstm1 PE=1 SV=2	22	4	4	4	218	26	7.94
P42227	Stat3		Signal transducer and activator of transcription 3 OS=Mus musculus OX=10090 GN=Stat3 PE=1 SV=2	1	1	1	1	770	88	6.3
Q62209	Sycp1		Synaptonemal complex protein 1 OS=Mus musculus OX=10090 GN=Sycp1 PE=1 SV=2	1	1	1	1	993	115.9	5.85
Q8BHG1	Nrdc		Nardilysin OS=Mus musculus OX=10090 GN=Nrdc PE=1 SV=1	3	3	3	3	1161	132.8	4.87
Q68FD5	Cltc		Clathrin heavy chain 1 OS=Mus musculus OX=10090 GN=Cltc PE=1 SV=3	51	65	81	65	1675	191.4	5.69
P62075	Timm13		Mitochondrial import inner membrane translocase subunit Tim13 OS=Mus musculus OX=10090 GN=Timm13 PE=1 SV=1	22	2	2	2	95	10.5	8.18
O70311	Nmt2		Glycylpeptide N-tetradecanoyltransferase 2 OS=Mus musculus OX=10090 GN=Nmt2 PE=1 SV=1	15	7	7	3	529	60.4	7.8
Q9JLV5	Cul3		Cullin-3 OS=Mus musculus OX=10090 GN=Cul3 PE=1 SV=1	2	1	1	1	768	88.9	8.46
Q9CZG3	Commd8		COMM domain-containing protein 8 OS=Mus musculus OX=10090 GN=Commd8 PE=1 SV=1	4	1	1	1	183	20.8	5.59
Q922W5	Pycr1		Pyrroline-5-carboxylate reductase 1, mitochondrial OS=Mus musculus OX=10090 GN=Pycr1 PE=1 SV=1	12	3	3	1	309	32.4	6.86
Q91VN6	Ddx41		Probable ATP-dependent RNA helicase DDX41 OS=Mus musculus OX=10090 GN=Ddx41 PE=1 SV=2	1	1	1	1	622	69.8	6.7
Q8JZQ2	Afg3l2		AFG3-like protein 2 OS=Mus musculus OX=10090 GN=Afg3l2 PE=1 SV=1	4	2	2	2	802	89.5	8.6
O88653	Lamtor3		Ragulator complex protein LAMTOR3 OS=Mus musculus OX=10090 GN=Lamtor3 PE=1 SV=1	9	1	1	1	124	13.5	7.34
Q8BJ71	Nup93		Nuclear pore complex protein Nup93 OS=Mus musculus OX=10090 GN=Nup93 PE=1 SV=1	11	9	9	9	819	93.2	5.72
Q61316	Hspa4		Heat shock 70 kDa protein 4 OS=Mus musculus OX=10090 GN=Hspa4 PE=1 SV=1	40	26	28	24	841	94.1	5.24
Q99PV0	Prpf8		Pre-mRNA-processing-splicing factor 8 OS=Mus musculus OX=10090 GN=Prpf8 PE=1 SV=2	21	41	43	41	2335	273.4	8.84
P61079	Ube2d3		Ubiquitin-conjugating enzyme E2 D3 OS=Mus musculus OX=10090 GN=Ube2d3 PE=1 SV=1	7	1	1	1	147	16.7	7.8
P61082	Ube2m		NEDD8-conjugating enzyme Ubc12 OS=Mus musculus OX=10090 GN=Ube2m PE=1 SV=1	16	3	3	3	183	20.9	7.69
P46638	Rab11b		Ras-related protein Rab-11B OS=Mus musculus OX=10090 GN=Rab11b PE=1 SV=3	16	4	4	4	218	24.5	5.94
Q9CR16	Ppid		Peptidyl-prolyl cis-trans isomerase D OS=Mus musculus OX=10090 GN=Ppid PE=1 SV=3	12	4	4	4	370	40.7	7.43
Q80VD1	Fam98b		Protein FAM98B OS=Mus musculus OX=10090 GN=Fam98b PE=1 SV=1	5	2	2	2	429	45.3	8.5
P47753	Capza1		F-actin-capping protein subunit alpha-1 OS=Mus musculus OX=10090 GN=Capza1 PE=1 SV=4	40	7	8	5	286	32.9	5.55
Q9Z2N8	Actl6a		Actin-like protein 6A OS=Mus musculus OX=10090 GN=Actl6a PE=1 SV=2	21	6	6	6	429	47.4	5.6
P23591	Gfus		GDP-L-fucose synthase OS=Mus musculus OX=10090 GN=Gfus PE=1 SV=3	4	1	1	1	321	35.9	6.74
Q9D938	Tmem160		Transmembrane protein 160 OS=Mus musculus OX=10090 GN=Tmem160 PE=2 SV=1	7	1	1	1	188	19.6	7.3
P47962	Rpl5		60S ribosomal protein L5 OS=Mus musculus OX=10090 GN=Rpl5 PE=1 SV=3	35	10	16	10	297	34.4	9.77
Q9CXT8	Pmpcb		Mitochondrial-processing peptidase subunit beta OS=Mus musculus OX=10090 GN=Pmpcb PE=1 SV=1	6	3	3	2	489	54.6	6.99
Q01768	Nme2		Nucleoside diphosphate kinase B OS=Mus musculus OX=10090 GN=Nme2 PE=1 SV=1	72	9	17	6	152	17.4	7.5
Q8BHJ5	Tbl1xr1		F-box-like/WD repeat-containing protein TBL1XR1 OS=Mus musculus OX=10090 GN=Tbl1xr1 PE=1 SV=1	6	2	2	2	514	55.6	5.63
Q80UM7	Mogs		Mannosyl-oligosaccharide glucosidase OS=Mus musculus OX=10090 GN=Mogs PE=1 SV=1	7	4	4	4	834	91.8	9
P97371	Psme1		Proteasome activator complex subunit 1 OS=Mus musculus OX=10090 GN=Psme1 PE=1 SV=2	17	4	4	4	249	28.7	5.97
Q9CQF9	Pcyox1		Prenylcysteine oxidase 1 OS=Mus musculus OX=10090 GN=Pcyox1 PE=1 SV=1	4	2	2	2	505	56.5	6.92
P63073	Eif4e		Eukaryotic translation initiation factor 4E OS=Mus musculus OX=10090 GN=Eif4e PE=1 SV=1	27	6	7	6	217	25	6.15
P83870	Phf5a		PHD finger-like domain-containing protein 5A OS=Mus musculus OX=10090 GN=Phf5a PE=1 SV=1	50	5	5	5	110	12.4	8.41
Q99P72	Rtn4		Reticulon-4 OS=Mus musculus OX=10090 GN=Rtn4 PE=1 SV=2	18	13	19	13	1162	126.5	4.54
Q9CRB9	Chchd3		MICOS complex subunit Mic19 OS=Mus musculus OX=10090 GN=Chchd3 PE=1 SV=1	27	6	7	6	227	26.3	8.37
Q9WV98	Timm9		Mitochondrial import inner membrane translocase subunit Tim9 OS=Mus musculus OX=10090 GN=Timm9 PE=1 SV=1	29	2	2	2	89	10.3	7.21
P26040	Ezr		Ezrin OS=Mus musculus OX=10090 GN=Ezr PE=1 SV=3	13	11	11	2	586	69.4	6.1
Q8JZQ9	Eif3b		Eukaryotic translation initiation factor 3 subunit B OS=Mus musculus OX=10090 GN=Eif3b PE=1 SV=1	23	17	17	17	803	91.3	5.02
Q6P2B1	Tnpo3		Transportin-3 OS=Mus musculus OX=10090 GN=Tnpo3 PE=1 SV=1	2	2	2	2	923	104.1	5.57
P39447	Tjp1		Tight junction protein ZO-1 OS=Mus musculus OX=10090 GN=Tjp1 PE=1 SV=2	4	5	5	5	1745	194.6	6.64
Q60634	Flot2		Flotillin-2 OS=Mus musculus OX=10090 GN=Flot2 PE=1 SV=2	3	1	1	1	428	47	5.2
Q9WVA4	Tagln2		Transgelin-2 OS=Mus musculus OX=10090 GN=Tagln2 PE=1 SV=4	56	9	9	9	199	22.4	8.24
Q9R1P0	Psma4		Proteasome subunit alpha type-4 OS=Mus musculus OX=10090 GN=Psma4 PE=1 SV=1	18	3	3	3	261	29.5	7.72
O09131	Gsto1		Glutathione S-transferase omega-1 OS=Mus musculus OX=10090 GN=Gsto1 PE=1 SV=2	31	8	8	8	240	27.5	7.36
O09044	Snap23		Synaptosomal-associated protein 23 OS=Mus musculus OX=10090 GN=Snap23 PE=1 SV=1	7	1	1	1	210	23.2	4.98
O08599	Stxbp1		Syntaxin-binding protein 1 OS=Mus musculus OX=10090 GN=Stxbp1 PE=1 SV=2	2	1	1	1	594	67.5	6.96
O08807	Prdx4		Peroxiredoxin-4 OS=Mus musculus OX=10090 GN=Prdx4 PE=1 SV=1	11	3	3	1	274	31	7.15
Q9D1M0	Sec13		Protein SEC13 homolog OS=Mus musculus OX=10090 GN=Sec13 PE=1 SV=3	13	4	5	4	322	35.5	5.38
P60824	Cirbp		Cold-inducible RNA-binding protein OS=Mus musculus OX=10090 GN=Cirbp PE=1 SV=1	6	1	1	1	172	18.6	9.61
Q569Z5	Ddx46		Probable ATP-dependent RNA helicase DDX46 OS=Mus musculus OX=10090 GN=Ddx46 PE=1 SV=2	10	9	9	9	1032	117.4	9.26
Q9D115	Znf706		Zinc finger protein 706 OS=Mus musculus OX=10090 GN=Znf706 PE=1 SV=1	14	1	1	1	76	8.5	10.01
P35278	Rab5c		Ras-related protein Rab-5C OS=Mus musculus OX=10090 GN=Rab5c PE=1 SV=2	22	4	4	2	216	23.4	8.41
P23927	Cryab		Alpha-crystallin B chain OS=Mus musculus OX=10090 GN=Cryab PE=1 SV=2	6	1	1	1	175	20.1	7.33
Q9CR62	Slc25a11		Mitochondrial 2-oxoglutarate/malate carrier protein OS=Mus musculus OX=10090 GN=Slc25a11 PE=1 SV=3	25	7	8	7	314	34.1	9.94
Q6P542	Abcf1		ATP-binding cassette sub-family F member 1 OS=Mus musculus OX=10090 GN=Abcf1 PE=1 SV=1	16	10	10	10	837	94.9	6.51
Q922Q4	Pycr2		Pyrroline-5-carboxylate reductase 2 OS=Mus musculus OX=10090 GN=Pycr2 PE=1 SV=1	15	4	5	2	320	33.6	7.77
P28660	Nckap1		Nck-associated protein 1 OS=Mus musculus OX=10090 GN=Nckap1 PE=1 SV=2	3	3	3	3	1128	128.7	6.62
P60122	Ruvbl1		RuvB-like 1 OS=Mus musculus OX=10090 GN=Ruvbl1 PE=1 SV=1	29	10	13	10	456	50.2	6.42
O54946	Dnajb6		DnaJ homolog subfamily B member 6 OS=Mus musculus OX=10090 GN=Dnajb6 PE=1 SV=4	8	2	2	2	365	39.8	9.36
Q99JT9	Adi1		Acireductone dioxygenase OS=Mus musculus OX=10090 GN=Adi1 PE=1 SV=1	4	1	1	1	179	21.5	5.5
Q7M6Y3	Picalm		Phosphatidylinositol-binding clathrin assembly protein OS=Mus musculus OX=10090 GN=Picalm PE=1 SV=1	12	6	7	6	660	71.5	7.91
Q91VJ2	Cavin3		Caveolae-associated protein 3 OS=Mus musculus OX=10090 GN=Cavin3 PE=1 SV=1	17	4	4	4	260	27.8	5.57
Q7TMB8	Cyfip1		Cytoplasmic FMR1-interacting protein 1 OS=Mus musculus OX=10090 GN=Cyfip1 PE=1 SV=1	1	2	2	2	1253	145.1	6.9
Q9JHI7	Exosc9		Exosome complex component RRP45 OS=Mus musculus OX=10090 GN=Exosc9 PE=1 SV=1	3	1	1	1	438	48.9	5.11
Q9DCH4	Eif3f		Eukaryotic translation initiation factor 3 subunit F OS=Mus musculus OX=10090 GN=Eif3f PE=1 SV=2	45	12	13	12	361	38	5.58
Q00519	Xdh		Xanthine dehydrogenase/oxidase OS=Mus musculus OX=10090 GN=Xdh PE=1 SV=5	1	1	1	1	1335	146.5	7.56
Q9R0I7	Ylpm1		YLP motif-containing protein 1 OS=Mus musculus OX=10090 GN=Ylpm1 PE=2 SV=2	1	2	2	2	1386	155	6.65
P60003	Elof1		Transcription elongation factor 1 homolog OS=Mus musculus OX=10090 GN=Elof1 PE=1 SV=1	22	1	1	1	83	9.5	8
P31938	Map2k1		Dual specificity mitogen-activated protein kinase kinase 1 OS=Mus musculus OX=10090 GN=Map2k1 PE=1 SV=2	4	2	2	2	393	43.4	6.7
P61087	Ube2k		Ubiquitin-conjugating enzyme E2 K OS=Mus musculus OX=10090 GN=Ube2k PE=1 SV=3	9	2	2	2	200	22.4	5.44
Q9QZD9	Eif3i		Eukaryotic translation initiation factor 3 subunit I OS=Mus musculus OX=10090 GN=Eif3i PE=1 SV=1	52	13	15	13	325	36.4	5.64
Q9Z1T1	Ap3b1		AP-3 complex subunit beta-1 OS=Mus musculus OX=10090 GN=Ap3b1 PE=1 SV=2	1	2	2	2	1105	122.7	5.66
P70388	Rad50		DNA repair protein RAD50 OS=Mus musculus OX=10090 GN=Rad50 PE=1 SV=1	2	3	3	3	1312	153.4	6.95
P99029	Prdx5		Peroxiredoxin-5, mitochondrial OS=Mus musculus OX=10090 GN=Prdx5 PE=1 SV=2	24	5	5	5	210	21.9	8.85
P62814	Atp6v1b2		V-type proton ATPase subunit B, brain isoform OS=Mus musculus OX=10090 GN=Atp6v1b2 PE=1 SV=1	13	5	5	5	511	56.5	5.81
P55849	Dsc1		Desmocollin-1 OS=Mus musculus OX=10090 GN=Dsc1 PE=1 SV=2	1	1	1	1	886	98.9	5.47
Q8R422	Cd109		CD109 antigen OS=Mus musculus OX=10090 GN=Cd109 PE=1 SV=1	8	11	12	11	1442	161.6	5.57
Q5SWU9	Acaca		Acetyl-CoA carboxylase 1 OS=Mus musculus OX=10090 GN=Acaca PE=1 SV=1	1	2	2	2	2345	265.1	6.39
Q920Q6	Msi2		RNA-binding protein Musashi homolog 2 OS=Mus musculus OX=10090 GN=Msi2 PE=1 SV=1	12	3	3	3	346	36.9	8.47
Q9CY97	Ssu72		RNA polymerase II subunit A C-terminal domain phosphatase SSU72 OS=Mus musculus OX=10090 GN=Ssu72 PE=1 SV=1	6	1	1	1	194	22.5	5.21
Q3U1G5	Isg20l2		Interferon-stimulated 20 kDa exonuclease-like 2 OS=Mus musculus OX=10090 GN=Isg20l2 PE=1 SV=2	3	1	1	1	368	41	10.01
Q8VI84	Noc3l		Nucleolar complex protein 3 homolog OS=Mus musculus OX=10090 GN=Noc3l PE=2 SV=2	1	1	1	1	807	93.2	9.09
Q9D1H8	Mrpl53		39S ribosomal protein L53, mitochondrial OS=Mus musculus OX=10090 GN=Mrpl53 PE=1 SV=1	19	2	2	2	118	12.7	9.52
Q9EP69	Sacm1l		Phosphatidylinositol-3-phosphatase SAC1 OS=Mus musculus OX=10090 GN=Sacm1l PE=1 SV=1	2	1	1	1	587	66.9	7.3
O88271	Cfdp1		Craniofacial development protein 1 OS=Mus musculus OX=10090 GN=Cfdp1 PE=1 SV=1	11	2	2	2	295	32.9	4.86
Q9D902	Gtf2e2		General transcription factor IIE subunit 2 OS=Mus musculus OX=10090 GN=Gtf2e2 PE=1 SV=2	3	1	1	1	292	33	9.64
P60867	Rps20		40S ribosomal protein S20 OS=Mus musculus OX=10090 GN=Rps20 PE=1 SV=1	25	3	5	3	119	13.4	9.94
Q62448	Eif4g2		Eukaryotic translation initiation factor 4 gamma 2 OS=Mus musculus OX=10090 GN=Eif4g2 PE=1 SV=2	23	17	17	17	906	102	7.14
Q64310	Surf4		Surfeit locus protein 4 OS=Mus musculus OX=10090 GN=Surf4 PE=1 SV=1	7	2	2	2	269	30.4	7.78
O70589	Cask		Peripheral plasma membrane protein CASK OS=Mus musculus OX=10090 GN=Cask PE=1 SV=2	1	1	1	1	926	105	6.43
P51859	Hdgf		Hepatoma-derived growth factor OS=Mus musculus OX=10090 GN=Hdgf PE=1 SV=2	38	8	11	8	237	26.3	4.83
Q8VH51	Rbm39		RNA-binding protein 39 OS=Mus musculus OX=10090 GN=Rbm39 PE=1 SV=2	24	10	11	10	530	59.4	10.1
P63158	Hmgb1		High mobility group protein B1 OS=Mus musculus OX=10090 GN=Hmgb1 PE=1 SV=2	44	10	16	9	215	24.9	5.74
D3YXK2	Safb		Scaffold attachment factor B1 OS=Mus musculus OX=10090 GN=Safb PE=1 SV=2	20	15	20	15	937	105	5.35
Q9R0P3	Esd		S-formylglutathione hydrolase OS=Mus musculus OX=10090 GN=Esd PE=1 SV=1	62	11	15	11	282	31.3	7.12
P62274	Rps29		40S ribosomal protein S29 OS=Mus musculus OX=10090 GN=Rps29 PE=1 SV=2	13	1	1	1	56	6.7	10.13
Q9CRD2	Emc2		ER membrane protein complex subunit 2 OS=Mus musculus OX=10090 GN=Emc2 PE=1 SV=1	8	2	2	2	297	34.9	6.81
Q6ZQH8	Nup188		Nucleoporin NUP188 OS=Mus musculus OX=10090 GN=Nup188 PE=1 SV=2	1	2	2	2	1759	196.6	7.01
Q76N33	Stambpl1		AMSH-like protease OS=Mus musculus OX=10090 GN=Stambpl1 PE=1 SV=1	3	1	1	1	436	49.6	7.53
P32233	Drg1		Developmentally-regulated GTP-binding protein 1 OS=Mus musculus OX=10090 GN=Drg1 PE=1 SV=1	4	1	1	1	367	40.5	8.9
P70202	Lxn		Latexin OS=Mus musculus OX=10090 GN=Lxn PE=1 SV=2	5	1	1	1	222	25.5	5.74
Q8VCX5	Micu1		Calcium uptake protein 1, mitochondrial OS=Mus musculus OX=10090 GN=Micu1 PE=1 SV=1	3	1	1	1	477	54.3	8.59
Q9D8X5	Cnot8		CCR4-NOT transcription complex subunit 8 OS=Mus musculus OX=10090 GN=Cnot8 PE=1 SV=1	4	1	1	1	292	33.6	4.81
P97461	Rps5		40S ribosomal protein S5 OS=Mus musculus OX=10090 GN=Rps5 PE=1 SV=3	25	5	5	5	204	22.9	9.72
P43135	Nr2f2		COUP transcription factor 2 OS=Mus musculus OX=10090 GN=Nr2f2 PE=1 SV=2	16	6	6	6	414	45.5	8.28
Q8BIP0	Dars2		Aspartate--tRNA ligase, mitochondrial OS=Mus musculus OX=10090 GN=Dars2 PE=1 SV=1	1	1	1	1	653	74.1	6.98
Q9R0E1	Plod3		Multifunctional procollagen lysine hydroxylase and glycosyltransferase LH3 OS=Mus musculus OX=10090 GN=Plod3 PE=1 SV=1	9	6	6	6	741	84.9	6.23
Q63918	Cavin2		Caveolae-associated protein 2 OS=Mus musculus OX=10090 GN=Cavin2 PE=1 SV=3	31	12	15	12	418	46.7	5.21
P47738	Aldh2		Aldehyde dehydrogenase, mitochondrial OS=Mus musculus OX=10090 GN=Aldh2 PE=1 SV=1	33	11	13	11	519	56.5	7.62
Q921E6	Eed		Polycomb protein EED OS=Mus musculus OX=10090 GN=Eed PE=1 SV=1	2	1	1	1	441	50.2	7.03
Q64514	Tpp2		Tripeptidyl-peptidase 2 OS=Mus musculus OX=10090 GN=Tpp2 PE=1 SV=3	8	9	9	9	1262	139.8	6.58
Q8BK72	Mrps27		28S ribosomal protein S27, mitochondrial OS=Mus musculus OX=10090 GN=Mrps27 PE=1 SV=2	9	3	3	3	415	47.7	5.5
Q9QYC0	Add1		Alpha-adducin OS=Mus musculus OX=10090 GN=Add1 PE=1 SV=2	3	2	2	2	735	80.6	5.9
Q99JX3	Gorasp2		Golgi reassembly-stacking protein 2 OS=Mus musculus OX=10090 GN=Gorasp2 PE=1 SV=3	12	4	4	4	451	47	4.79
Q9CPT5	Nop16		Nucleolar protein 16 OS=Mus musculus OX=10090 GN=Nop16 PE=1 SV=1	6	1	1	1	178	21.1	9.91
Q9JHP7	Poglut2		Protein O-glucosyltransferase 2 OS=Mus musculus OX=10090 GN=Poglut2 PE=1 SV=1	3	1	1	1	502	57.9	7.9
Q9JJ80	Rpf2		Ribosome production factor 2 homolog OS=Mus musculus OX=10090 GN=Rpf2 PE=2 SV=2	6	2	2	2	306	35.3	10.04
Q9CQJ6	Denr		Density-regulated protein OS=Mus musculus OX=10090 GN=Denr PE=1 SV=1	4	1	1	1	198	22.2	5.3
Q8CHY6	Gatad2a		Transcriptional repressor p66 alpha OS=Mus musculus OX=10090 GN=Gatad2a PE=1 SV=2	12	6	6	6	629	67.3	9.89
Q9QZS0	Col4a3		Collagen alpha-3(IV) chain OS=Mus musculus OX=10090 GN=Col4a3 PE=1 SV=2	1	1	1	1	1669	161.6	9.48
Q9EQH3	Vps35		Vacuolar protein sorting-associated protein 35 OS=Mus musculus OX=10090 GN=Vps35 PE=1 SV=1	10	7	7	7	796	91.7	5.44
P70279	Surf6		Surfeit locus protein 6 OS=Mus musculus OX=10090 GN=Surf6 PE=1 SV=1	5	2	3	2	355	41.2	10.52
P81117	Nucb2		Nucleobindin-2 OS=Mus musculus OX=10090 GN=Nucb2 PE=1 SV=2	2	1	1	1	420	50.3	5.15
P50516	Atp6v1a		V-type proton ATPase catalytic subunit A OS=Mus musculus OX=10090 GN=Atp6v1a PE=1 SV=2	12	7	7	7	617	68.3	5.58
Q9CPY4	Cdk2ap2		Cyclin-dependent kinase 2-associated protein 2 OS=Mus musculus OX=10090 GN=Cdk2ap2 PE=1 SV=1	6	1	1	1	127	13.2	9.48
P48024	Eif1		Eukaryotic translation initiation factor 1 OS=Mus musculus OX=10090 GN=Eif1 PE=1 SV=2	42	4	5	4	113	12.7	7.44
Q9JMD0	Znf207		BUB3-interacting and GLEBS motif-containing protein ZNF207 OS=Mus musculus OX=10090 GN=Znf207 PE=1 SV=1	7	3	3	3	495	52.8	9.1
Q61329	Zfhx3		Zinc finger homeobox protein 3 OS=Mus musculus OX=10090 GN=Zfhx3 PE=1 SV=1	0	1	1	1	3726	406.3	6.24
Q07813	Bax		Apoptosis regulator BAX OS=Mus musculus OX=10090 GN=Bax PE=1 SV=1	7	1	1	1	192	21.4	4.98
Q8VEJ4	Nle1		Notchless protein homolog 1 OS=Mus musculus OX=10090 GN=Nle1 PE=1 SV=4	2	1	1	1	485	53.1	7.17
P62322	Lsm5		U6 snRNA-associated Sm-like protein LSm5 OS=Mus musculus OX=10090 GN=Lsm5 PE=3 SV=2	21	1	1	1	91	9.9	4.54
Q99KY4	Gak		Cyclin-G-associated kinase OS=Mus musculus OX=10090 GN=Gak PE=1 SV=2	1	1	1	1	1305	143.6	5.73
Q62165	Dag1		Dystroglycan 1 OS=Mus musculus OX=10090 GN=Dag1 PE=1 SV=4	4	3	3	3	893	96.8	8.44
Q6WKZ8	Ubr2		E3 ubiquitin-protein ligase UBR2 OS=Mus musculus OX=10090 GN=Ubr2 PE=1 SV=2	1	1	1	1	1755	199	6.33
Q02819	Nucb1		Nucleobindin-1 OS=Mus musculus OX=10090 GN=Nucb1 PE=1 SV=2	2	1	1	1	459	53.4	5.07
A2AGT5	Ckap5		Cytoskeleton-associated protein 5 OS=Mus musculus OX=10090 GN=Ckap5 PE=1 SV=1	8	12	12	12	2032	225.5	7.96
Q9QYI4	Dnajb12		DnaJ homolog subfamily B member 12 OS=Mus musculus OX=10090 GN=Dnajb12 PE=1 SV=2	3	1	1	1	376	42	8.51
P63325	Rps10		40S ribosomal protein S10 OS=Mus musculus OX=10090 GN=Rps10 PE=1 SV=1	44	7	9	7	165	18.9	10.15
A4QPC6	Btn2a2		Butyrophilin subfamily 2 member A2 OS=Mus musculus OX=10090 GN=Btn2a2 PE=1 SV=1	1	1	1	1	514	58.4	5.9
P18572	Bsg		Basigin OS=Mus musculus OX=10090 GN=Bsg PE=1 SV=2	11	4	5	4	389	42.4	5.85
P61965	Wdr5		WD repeat-containing protein 5 OS=Mus musculus OX=10090 GN=Wdr5 PE=1 SV=1	11	3	3	3	334	36.6	8.27
Q8CHW4	Eif2b5		Translation initiation factor eIF-2B subunit epsilon OS=Mus musculus OX=10090 GN=Eif2b5 PE=1 SV=1	3	2	2	2	717	80	5.07
P62315	Snrpd1		Small nuclear ribonucleoprotein Sm D1 OS=Mus musculus OX=10090 GN=Snrpd1 PE=1 SV=1	37	4	6	4	119	13.3	11.56
P62774	Mtpn		Myotrophin OS=Mus musculus OX=10090 GN=Mtpn PE=1 SV=2	14	2	2	2	118	12.9	5.52
Q99L88	Sntb1		Beta-1-syntrophin OS=Mus musculus OX=10090 GN=Sntb1 PE=1 SV=4	1	1	1	1	537	58	8.31
Q9JLB0	Pals2		Protein PALS2 OS=Mus musculus OX=10090 GN=Pals2 PE=1 SV=1	1	1	1	1	553	62.6	6.4
Q9WVB4	Slit3		Slit homolog 3 protein OS=Mus musculus OX=10090 GN=Slit3 PE=2 SV=2	3	5	5	5	1523	167.6	7.62
P58501	Paxbp1		PAX3- and PAX7-binding protein 1 OS=Mus musculus OX=10090 GN=Paxbp1 PE=1 SV=3	1	1	2	1	919	104.8	5.67
Q9EP71	Rai14		Ankycorbin OS=Mus musculus OX=10090 GN=Rai14 PE=1 SV=1	4	4	4	4	979	108.8	6.27
Q64449	Mrc2		C-type mannose receptor 2 OS=Mus musculus OX=10090 GN=Mrc2 PE=1 SV=3	1	2	2	2	1479	167	5.99
Q8VDP4	Ccar2		Cell cycle and apoptosis regulator protein 2 OS=Mus musculus OX=10090 GN=Ccar2 PE=1 SV=2	5	4	4	4	922	102.9	5.25
Q64674	Srm		Spermidine synthase OS=Mus musculus OX=10090 GN=Srm PE=1 SV=1	3	1	1	1	302	34	5.5
Q62376	Snrnp70		U1 small nuclear ribonucleoprotein 70 kDa OS=Mus musculus OX=10090 GN=Snrnp70 PE=1 SV=2	32	13	16	13	448	52	9.94
F8VPU2	Farp1		FERM, ARHGEF and pleckstrin domain-containing protein 1 OS=Mus musculus OX=10090 GN=Farp1 PE=1 SV=1	13	10	10	10	1048	118.8	7.88
P21956	Mfge8		Lactadherin OS=Mus musculus OX=10090 GN=Mfge8 PE=1 SV=3	40	13	16	13	463	51.2	6.52
P62317	Snrpd2		Small nuclear ribonucleoprotein Sm D2 OS=Mus musculus OX=10090 GN=Snrpd2 PE=1 SV=1	53	6	9	6	118	13.5	9.91
Q80SY5	Prpf38b		Pre-mRNA-splicing factor 38B OS=Mus musculus OX=10090 GN=Prpf38b PE=1 SV=1	3	2	2	2	542	63.7	10.54
Q9QY76	Vapb		Vesicle-associated membrane protein-associated protein B OS=Mus musculus OX=10090 GN=Vapb PE=1 SV=3	9	2	3	2	243	26.9	7.78
Q571G4	Lin54		Protein lin-54 homolog OS=Mus musculus OX=10090 GN=Lin54 PE=2 SV=2	1	1	1	1	749	79.5	9.01
Q9CUN6	Smurf1		E3 ubiquitin-protein ligase SMURF1 OS=Mus musculus OX=10090 GN=Smurf1 PE=1 SV=2	1	1	1	1	731	83.3	7.27
F6ZDS4	Tpr		Nucleoprotein TPR OS=Mus musculus OX=10090 GN=Tpr PE=1 SV=1	15	33	35	33	2431	273.8	5.03
Q60932	Vdac1		Voltage-dependent anion-selective channel protein 1 OS=Mus musculus OX=10090 GN=Vdac1 PE=1 SV=3	62	13	19	12	296	32.3	8.43
O70318	Epb41l2		Band 4.1-like protein 2 OS=Mus musculus OX=10090 GN=Epb41l2 PE=1 SV=2	13	10	10	8	988	109.9	5.43
Q923D2	Blvrb		Flavin reductase (NADPH) OS=Mus musculus OX=10090 GN=Blvrb PE=1 SV=3	4	1	1	1	206	22.2	7.01
O09111	Ndufb11		NADH dehydrogenase [ubiquinone] 1 beta subcomplex subunit 11, mitochondrial OS=Mus musculus OX=10090 GN=Ndufb11 PE=1 SV=2	7	1	1	1	151	17.4	5.22
P67871	Csnk2b		Casein kinase II subunit beta OS=Mus musculus OX=10090 GN=Csnk2b PE=1 SV=1	21	3	3	3	215	24.9	5.55
Q99M31	Hspa14		Heat shock 70 kDa protein 14 OS=Mus musculus OX=10090 GN=Hspa14 PE=1 SV=2	9	4	4	4	509	54.6	5.92
P67778	Phb1		Prohibitin 1 OS=Mus musculus OX=10090 GN=Phb1 PE=1 SV=1	68	12	13	12	272	29.8	5.76
P63037	Dnaja1		DnaJ homolog subfamily A member 1 OS=Mus musculus OX=10090 GN=Dnaja1 PE=1 SV=1	10	3	3	3	397	44.8	7.08
P62984	Uba52		Ubiquitin-60S ribosomal protein L40 OS=Mus musculus OX=10090 GN=Uba52 PE=1 SV=2	41	5	13	1	128	14.7	9.83
Q3TYS2	Cybc1		Cytochrome b-245 chaperone 1 OS=Mus musculus OX=10090 GN=Cybc1 PE=1 SV=2	5	1	1	1	187	20.9	8.59
A2A432	Cul4b		Cullin-4B OS=Mus musculus OX=10090 GN=Cul4b PE=1 SV=1	2	2	2	2	970	110.6	8.37
Q9QXX4	Slc25a13		Electrogenic aspartate/glutamate antiporter SLC25A13, mitochondrial OS=Mus musculus OX=10090 GN=Slc25a13 PE=1 SV=1	8	5	5	3	676	74.4	8.6
P17809	Slc2a1		Solute carrier family 2, facilitated glucose transporter member 1 OS=Mus musculus OX=10090 GN=Slc2a1 PE=1 SV=4	6	3	3	3	492	53.9	8.87
Q5DU09	Znf652		Zinc finger protein 652 OS=Mus musculus OX=10090 GN=Znf652 PE=1 SV=2	2	1	1	1	608	69.4	8.75
Q61543	Glg1		Golgi apparatus protein 1 OS=Mus musculus OX=10090 GN=Glg1 PE=1 SV=1	16	17	17	17	1175	133.6	6.84
Q9JKY5	Hip1r		Huntingtin-interacting protein 1-related protein OS=Mus musculus OX=10090 GN=Hip1r PE=1 SV=2	1	1	1	1	1068	119.4	6.52
Q9D0R2	Tars1		Threonine--tRNA ligase 1, cytoplasmic OS=Mus musculus OX=10090 GN=Tars1 PE=1 SV=2	5	3	3	3	722	83.3	7.36
Q99K43	Prc1		Protein regulator of cytokinesis 1 OS=Mus musculus OX=10090 GN=Prc1 PE=1 SV=2	12	6	6	5	603	70.2	7.58
Q8K003	Tma7		Translation machinery-associated protein 7 OS=Mus musculus OX=10090 GN=Tma7 PE=3 SV=1	14	1	1	1	64	7.1	9.99
Q91V41	Rab14		Ras-related protein Rab-14 OS=Mus musculus OX=10090 GN=Rab14 PE=1 SV=3	37	7	8	6	215	23.9	6.21
Q9WVL0	Gstz1		Maleylacetoacetate isomerase OS=Mus musculus OX=10090 GN=Gstz1 PE=1 SV=1	4	1	1	1	216	24.3	7.85
O89090	Sp1		Transcription factor Sp1 OS=Mus musculus OX=10090 GN=Sp1 PE=1 SV=2	1	1	1	1	784	80.7	7.34
Q5XJE5	Leo1		RNA polymerase-associated protein LEO1 OS=Mus musculus OX=10090 GN=Leo1 PE=1 SV=2	2	1	1	1	667	75.6	4.46
Q04736	Yes1		Tyrosine-protein kinase Yes OS=Mus musculus OX=10090 GN=Yes1 PE=1 SV=3	3	2	2	2	541	60.6	6.64
Q8CGK3	Lonp1		Lon protease homolog, mitochondrial OS=Mus musculus OX=10090 GN=Lonp1 PE=1 SV=2	6	6	6	6	949	105.8	6.57
O88544	Cops4		COP9 signalosome complex subunit 4 OS=Mus musculus OX=10090 GN=Cops4 PE=1 SV=1	20	7	7	7	406	46.3	5.83
Q61187	Tsg101		Tumor susceptibility gene 101 protein OS=Mus musculus OX=10090 GN=Tsg101 PE=1 SV=2	3	1	1	1	391	44.1	6.71
Q9CYA6	Zcchc8		Zinc finger CCHC domain-containing protein 8 OS=Mus musculus OX=10090 GN=Zcchc8 PE=1 SV=3	7	3	3	3	709	78	4.73
Q9CQW1	Ykt6		Synaptobrevin homolog YKT6 OS=Mus musculus OX=10090 GN=Ykt6 PE=1 SV=1	5	1	1	1	198	22.3	6.35
Q9CWN7	Cnot11		CCR4-NOT transcription complex subunit 11 OS=Mus musculus OX=10090 GN=Cnot11 PE=1 SV=1	5	2	2	2	505	54.9	6.55
Q9CWZ3	Rbm8a		RNA-binding protein 8A OS=Mus musculus OX=10090 GN=Rbm8a PE=1 SV=4	34	5	5	5	174	19.9	5.72
Q60864	Stip1		Stress-induced-phosphoprotein 1 OS=Mus musculus OX=10090 GN=Stip1 PE=1 SV=1	39	20	24	20	543	62.5	6.8
Q9D8V0	Hm13		Minor histocompatibility antigen H13 OS=Mus musculus OX=10090 GN=Hm13 PE=1 SV=1	6	2	2	2	378	41.7	6.04
O35286	Dhx15		ATP-dependent RNA helicase DHX15 OS=Mus musculus OX=10090 GN=Dhx15 PE=1 SV=2	19	13	15	13	795	90.9	7.46
Q8BTI8	Srrm2		Serine/arginine repetitive matrix protein 2 OS=Mus musculus OX=10090 GN=Srrm2 PE=1 SV=3	10	21	22	21	2703	294.7	12.03
Q9Z1M8	Ik		Protein Red OS=Mus musculus OX=10090 GN=Ik PE=1 SV=2	16	8	9	8	557	65.6	6.64
P84091	Ap2m1		AP-2 complex subunit mu OS=Mus musculus OX=10090 GN=Ap2m1 PE=1 SV=1	31	11	11	11	435	49.6	9.54
Q63850	Nup62		Nuclear pore glycoprotein p62 OS=Mus musculus OX=10090 GN=Nup62 PE=1 SV=2	5	2	2	2	526	53.2	5.31
P27612	Plaa		Phospholipase A-2-activating protein OS=Mus musculus OX=10090 GN=Plaa PE=1 SV=4	8	6	6	6	794	87.2	6.14
Q00PI9	Hnrnpul2		Heterogeneous nuclear ribonucleoprotein U-like protein 2 OS=Mus musculus OX=10090 GN=Hnrnpul2 PE=1 SV=2	22	13	14	13	745	84.9	4.89
O88844	Idh1		Isocitrate dehydrogenase [NADP] cytoplasmic OS=Mus musculus OX=10090 GN=Idh1 PE=1 SV=2	16	6	6	5	414	46.6	7.17
P63005	Pafah1b1		Platelet-activating factor acetylhydrolase IB subunit beta OS=Mus musculus OX=10090 GN=Pafah1b1 PE=1 SV=2	14	5	5	4	410	46.6	7.37
P53690	Mmp14		Matrix metalloproteinase-14 OS=Mus musculus OX=10090 GN=Mmp14 PE=2 SV=3	8	4	4	4	582	65.9	8.03
Q62241	Snrpc		U1 small nuclear ribonucleoprotein C OS=Mus musculus OX=10090 GN=Snrpc PE=1 SV=1	19	2	2	2	159	17.4	9.67
Q9D2L9	Fam111a		Serine protease FAM111A OS=Mus musculus OX=10090 GN=Fam111a PE=2 SV=1	2	1	1	1	613	69.9	8.44
Q7TT50	Cdc42bpb		Serine/threonine-protein kinase MRCK beta OS=Mus musculus OX=10090 GN=Cdc42bpb PE=1 SV=2	1	2	2	2	1713	194.6	6.46
Q60716	P4ha2		Prolyl 4-hydroxylase subunit alpha-2 OS=Mus musculus OX=10090 GN=P4ha2 PE=1 SV=1	22	10	10	10	537	61	5.8
Q8CJF8	Ago4		Protein argonaute-4 OS=Mus musculus OX=10090 GN=Ago4 PE=2 SV=2	1	1	1	1	861	97	9.06
Q8K2T8	Paf1		RNA polymerase II-associated factor 1 homolog OS=Mus musculus OX=10090 GN=Paf1 PE=1 SV=1	5	2	2	2	535	60.5	4.65
Q3TAS6	Emc10		ER membrane protein complex subunit 10 OS=Mus musculus OX=10090 GN=Emc10 PE=2 SV=2	3	1	1	1	258	27	5.91
P51432	Plcb3		1-phosphatidylinositol 4,5-bisphosphate phosphodiesterase beta-3 OS=Mus musculus OX=10090 GN=Plcb3 PE=1 SV=2	2	2	3	2	1234	139.4	5.94
P62305	Snrpe		Small nuclear ribonucleoprotein E OS=Mus musculus OX=10090 GN=Snrpe PE=1 SV=1	25	2	2	2	92	10.8	9.44
P46664	Adss2		Adenylosuccinate synthetase isozyme 2 OS=Mus musculus OX=10090 GN=Adss2 PE=1 SV=2	2	1	1	1	456	50	6.38
Q9CQ40	Mrpl49		39S ribosomal protein L49, mitochondrial OS=Mus musculus OX=10090 GN=Mrpl49 PE=1 SV=1	7	1	1	1	166	19.1	9.5
Q9Z0R4	Itsn1		Intersectin-1 OS=Mus musculus OX=10090 GN=Itsn1 PE=1 SV=2	0	1	1	1	1714	194.2	7.91
Q5F2E8	Taok1		Serine/threonine-protein kinase TAO1 OS=Mus musculus OX=10090 GN=Taok1 PE=1 SV=1	4	4	4	3	1001	116	7.55
Q9DC16	Ergic1		Endoplasmic reticulum-Golgi intermediate compartment protein 1 OS=Mus musculus OX=10090 GN=Ergic1 PE=1 SV=1	11	3	3	3	290	32.5	7.06
Q91WV0	Dr1		Protein Dr1 OS=Mus musculus OX=10090 GN=Dr1 PE=1 SV=1	8	1	1	1	176	19.4	4.75
Q9WTX6	Cul1		Cullin-1 OS=Mus musculus OX=10090 GN=Cul1 PE=1 SV=1	2	2	2	2	776	89.6	8
Q08024	Cbfb		Core-binding factor subunit beta OS=Mus musculus OX=10090 GN=Cbfb PE=1 SV=1	12	2	2	2	187	22	5.77
P62313	Lsm6		U6 snRNA-associated Sm-like protein LSm6 OS=Mus musculus OX=10090 GN=Lsm6 PE=1 SV=1	19	2	2	2	80	9.1	9.58
P27808	Mgat1		Alpha-1,3-mannosyl-glycoprotein 2-beta-N-acetylglucosaminyltransferase OS=Mus musculus OX=10090 GN=Mgat1 PE=1 SV=1	4	1	1	1	447	51.7	8.9
Q91VM9	Ppa2		Inorganic pyrophosphatase 2, mitochondrial OS=Mus musculus OX=10090 GN=Ppa2 PE=1 SV=1	4	1	1	1	330	38.1	6.98
P49717	Mcm4		DNA replication licensing factor MCM4 OS=Mus musculus OX=10090 GN=Mcm4 PE=1 SV=1	10	8	8	8	862	96.7	7.2
Q69Z38	Peak1		Inactive tyrosine-protein kinase PEAK1 OS=Mus musculus OX=10090 GN=Peak1 PE=1 SV=4	1	2	2	2	1735	191	6.87
Q8CCP0	Nemf		Ribosome quality control complex subunit NEMF OS=Mus musculus OX=10090 GN=Nemf PE=1 SV=2	2	2	2	2	1064	121.1	6.8
Q9DCD0	Pgd		6-phosphogluconate dehydrogenase, decarboxylating OS=Mus musculus OX=10090 GN=Pgd PE=1 SV=3	21	8	8	8	483	53.2	7.23
Q8BGD9	Eif4b		Eukaryotic translation initiation factor 4B OS=Mus musculus OX=10090 GN=Eif4b PE=1 SV=1	30	16	18	16	611	68.8	5.67
Q9D0D4	Dimt1		Probable dimethyladenosine transferase OS=Mus musculus OX=10090 GN=Dimt1 PE=2 SV=1	7	2	2	2	313	35.3	9.99
Q61545	Ewsr1		RNA-binding protein EWS OS=Mus musculus OX=10090 GN=Ewsr1 PE=1 SV=2	14	6	7	6	655	68.4	9.33
P97450	Atp5pf		ATP synthase-coupling factor 6, mitochondrial OS=Mus musculus OX=10090 GN=Atp5pf PE=1 SV=1	27	2	2	2	108	12.5	9.36
Q99JB2	Stoml2		Stomatin-like protein 2, mitochondrial OS=Mus musculus OX=10090 GN=Stoml2 PE=1 SV=1	8	2	2	2	353	38.4	8.87
Q923D4	Sf3b5		Splicing factor 3B subunit 5 OS=Mus musculus OX=10090 GN=Sf3b5 PE=1 SV=1	45	3	4	3	86	10.1	6.35
Q9D0R4	Ddx56		Probable ATP-dependent RNA helicase DDX56 OS=Mus musculus OX=10090 GN=Ddx56 PE=1 SV=1	3	1	1	1	546	61.2	9.17
Q5SUR0	Pfas		Phosphoribosylformylglycinamidine synthase OS=Mus musculus OX=10090 GN=Pfas PE=1 SV=1	3	3	3	3	1337	144.5	5.67
Q8VCW8	Acsf2		Medium-chain acyl-CoA ligase ACSF2, mitochondrial OS=Mus musculus OX=10090 GN=Acsf2 PE=1 SV=1	2	1	1	1	615	67.9	8.18
Q9JIS8	Slc12a4		Solute carrier family 12 member 4 OS=Mus musculus OX=10090 GN=Slc12a4 PE=1 SV=2	1	1	1	1	1085	120.5	6.67
Q8BL66	Eea1		Early endosome antigen 1 OS=Mus musculus OX=10090 GN=Eea1 PE=1 SV=2	1	1	1	1	1411	160.8	5.77
Q3TJZ6	Fam98a		Protein FAM98A OS=Mus musculus OX=10090 GN=Fam98a PE=1 SV=1	8	3	3	3	515	55	8.95
Q8VDJ3	Hdlbp		Vigilin OS=Mus musculus OX=10090 GN=Hdlbp PE=1 SV=1	30	29	31	29	1268	141.7	6.87
Q02614	Sap30bp		SAP30-binding protein OS=Mus musculus OX=10090 GN=Sap30bp PE=1 SV=2	14	4	4	4	308	33.8	4.87
P28656	Nap1l1		Nucleosome assembly protein 1-like 1 OS=Mus musculus OX=10090 GN=Nap1l1 PE=1 SV=2	16	4	5	4	391	45.3	4.46
Q9QYA2	Tomm40		Mitochondrial import receptor subunit TOM40 homolog OS=Mus musculus OX=10090 GN=Tomm40 PE=1 SV=3	33	7	9	7	361	37.9	7.74
P46935	Nedd4		E3 ubiquitin-protein ligase NEDD4 OS=Mus musculus OX=10090 GN=Nedd4 PE=1 SV=3	18	14	15	14	887	102.6	5.26
Q9CQZ5	Ndufa6		NADH dehydrogenase [ubiquinone] 1 alpha subcomplex subunit 6 OS=Mus musculus OX=10090 GN=Ndufa6 PE=1 SV=1	6	1	1	1	131	15.3	10.11
Q03173	Enah		Protein enabled homolog OS=Mus musculus OX=10090 GN=Enah PE=1 SV=2	1	1	1	1	802	85.8	7.72
Q9CQ10	Chmp3		Charged multivesicular body protein 3 OS=Mus musculus OX=10090 GN=Chmp3 PE=1 SV=3	5	1	1	1	224	25.2	5.06
P97820	Map4k4		Mitogen-activated protein kinase kinase kinase kinase 4 OS=Mus musculus OX=10090 GN=Map4k4 PE=1 SV=1	1	2	2	1	1233	140.5	7.47
Q99PT1	Arhgdia		Rho GDP-dissociation inhibitor 1 OS=Mus musculus OX=10090 GN=Arhgdia PE=1 SV=3	51	8	8	8	204	23.4	5.2
P35441	Thbs1		Thrombospondin-1 OS=Mus musculus OX=10090 GN=Thbs1 PE=1 SV=1	6	7	7	7	1170	129.6	4.96
P97370	Atp1b3		Sodium/potassium-transporting ATPase subunit beta-3 OS=Mus musculus OX=10090 GN=Atp1b3 PE=1 SV=1	4	1	1	1	278	31.8	8.51
Q8CAQ8	Immt		MICOS complex subunit Mic60 OS=Mus musculus OX=10090 GN=Immt PE=1 SV=1	45	31	36	31	757	83.8	6.61
Q8BMB3	Eif4e2		Eukaryotic translation initiation factor 4E type 2 OS=Mus musculus OX=10090 GN=Eif4e2 PE=1 SV=1	4	1	1	1	245	28.2	8.87
Q8BPB0	Mob1b		MOB kinase activator 1B OS=Mus musculus OX=10090 GN=Mob1b PE=1 SV=3	14	3	3	3	216	25.1	6.73
P34884	Mif		Macrophage migration inhibitory factor OS=Mus musculus OX=10090 GN=Mif PE=1 SV=2	14	2	2	2	115	12.5	7.34
Q8CFQ3	Aqr		RNA helicase aquarius OS=Mus musculus OX=10090 GN=Aqr PE=1 SV=2	2	2	2	2	1481	170.2	6.27
P11440	Cdk1		Cyclin-dependent kinase 1 OS=Mus musculus OX=10090 GN=Cdk1 PE=1 SV=3	16	4	4	4	297	34.1	8.43
Q8BU14	Sec62		Translocation protein SEC62 OS=Mus musculus OX=10090 GN=Sec62 PE=1 SV=1	5	2	2	2	398	45.6	7.31
Q8C570	Rae1		mRNA export factor OS=Mus musculus OX=10090 GN=Rae1 PE=1 SV=1	4	1	1	1	368	40.9	7.83
Q9CWS0	Ddah1		N(G),N(G)-dimethylarginine dimethylaminohydrolase 1 OS=Mus musculus OX=10090 GN=Ddah1 PE=1 SV=3	16	4	4	3	285	31.4	5.97
P05201	Got1		Aspartate aminotransferase, cytoplasmic OS=Mus musculus OX=10090 GN=Got1 PE=1 SV=3	6	2	3	2	413	46.2	7.14
Q9DCS9	Ndufb10		NADH dehydrogenase [ubiquinone] 1 beta subcomplex subunit 10 OS=Mus musculus OX=10090 GN=Ndufb10 PE=1 SV=3	13	2	2	2	176	21	8.03
Q8K0D5	Gfm1		Elongation factor G, mitochondrial OS=Mus musculus OX=10090 GN=Gfm1 PE=1 SV=1	2	1	1	1	751	83.5	6.92
Q9JIZ9	Plscr3		Phospholipid scramblase 3 OS=Mus musculus OX=10090 GN=Plscr3 PE=1 SV=1	6	1	1	1	296	31.8	6.38
Q8CHH9	Septin8		Septin-8 OS=Mus musculus OX=10090 GN=Septin8 PE=1 SV=4	17	7	8	4	429	49.8	6
Q7TT37	Elp1		Elongator complex protein 1 OS=Mus musculus OX=10090 GN=Elp1 PE=1 SV=2	1	1	1	1	1333	149.5	6
O08528	Hk2		Hexokinase-2 OS=Mus musculus OX=10090 GN=Hk2 PE=1 SV=1	15	12	12	10	917	102.5	6.11
Q60902	Eps15l1		Epidermal growth factor receptor substrate 15-like 1 OS=Mus musculus OX=10090 GN=Eps15l1 PE=1 SV=3	6	5	5	5	907	99.2	5.02
Q60631	Grb2		Growth factor receptor-bound protein 2 OS=Mus musculus OX=10090 GN=Grb2 PE=1 SV=1	15	3	3	3	217	25.2	6.32
P70353	Nfyc		Nuclear transcription factor Y subunit gamma OS=Mus musculus OX=10090 GN=Nfyc PE=1 SV=2	4	1	1	1	335	37.2	4.98
P26883	Fkbp1a		Peptidyl-prolyl cis-trans isomerase FKBP1A OS=Mus musculus OX=10090 GN=Fkbp1a PE=1 SV=2	25	2	2	2	108	11.9	8.16
P67984	Rpl22		60S ribosomal protein L22 OS=Mus musculus OX=10090 GN=Rpl22 PE=1 SV=2	39	3	3	3	128	14.8	9.19
E9Q7G0	Numa1		Nuclear mitotic apparatus protein 1 OS=Mus musculus OX=10090 GN=Numa1 PE=1 SV=1	25	43	44	43	2094	235.5	5.87
P35979	Rpl12		60S ribosomal protein L12 OS=Mus musculus OX=10090 GN=Rpl12 PE=1 SV=2	64	9	13	9	165	17.8	9.42
Q80W54	Zmpste24		CAAX prenyl protease 1 homolog OS=Mus musculus OX=10090 GN=Zmpste24 PE=1 SV=2	4	2	2	2	475	54.7	6.95
Q8BTV2	Cpsf7		Cleavage and polyadenylation specificity factor subunit 7 OS=Mus musculus OX=10090 GN=Cpsf7 PE=1 SV=2	14	5	6	5	471	52	8
Q9D1G1	Rab1b		Ras-related protein Rab-1B OS=Mus musculus OX=10090 GN=Rab1b PE=1 SV=1	40	8	10	3	201	22.2	5.73
P62915	Gtf2b		Transcription initiation factor IIB OS=Mus musculus OX=10090 GN=Gtf2b PE=1 SV=1	3	1	1	1	316	34.8	8.35
Q5RL79	Krtcap2		Keratinocyte-associated protein 2 OS=Mus musculus OX=10090 GN=Krtcap2 PE=1 SV=2	13	1	1	1	136	14.7	9.61
P83940	Eloc		Elongin-C OS=Mus musculus OX=10090 GN=Eloc PE=1 SV=1	65	6	6	6	112	12.5	4.78
Q8C0L0	Tmx4		Thioredoxin-related transmembrane protein 4 OS=Mus musculus OX=10090 GN=Tmx4 PE=1 SV=2	4	1	1	1	335	37.1	4.37
Q91VR5	Ddx1		ATP-dependent RNA helicase DDX1 OS=Mus musculus OX=10090 GN=Ddx1 PE=1 SV=1	27	16	20	16	740	82.4	7.21
P97868	Rbbp6		E3 ubiquitin-protein ligase RBBP6 OS=Mus musculus OX=10090 GN=Rbbp6 PE=1 SV=5	2	3	3	3	1790	199.5	9.63
Q01339	Apoh		Beta-2-glycoprotein 1 OS=Mus musculus OX=10090 GN=Apoh PE=1 SV=1	3	1	1	1	345	38.6	8.22
Q99LT0	Dpy30		Protein dpy-30 homolog OS=Mus musculus OX=10090 GN=Dpy30 PE=1 SV=1	36	2	3	2	99	11.2	4.88
Q99KF1	Tmed9		Transmembrane emp24 domain-containing protein 9 OS=Mus musculus OX=10090 GN=Tmed9 PE=1 SV=2	5	1	1	1	235	27.1	8.41
Q8BMS1	Hadha		Trifunctional enzyme subunit alpha, mitochondrial OS=Mus musculus OX=10090 GN=Hadha PE=1 SV=1	21	13	14	13	763	82.6	9.14
Q9DBZ1	Ikbip		Inhibitor of nuclear factor kappa-B kinase-interacting protein OS=Mus musculus OX=10090 GN=Ikbip PE=1 SV=2	16	6	6	6	373	42.5	5.1
O89086	Rbm3		RNA-binding protein 3 OS=Mus musculus OX=10090 GN=Rbm3 PE=1 SV=1	39	5	9	5	153	16.6	7.5
Q61033	Tmpo		Lamina-associated polypeptide 2, isoforms alpha/zeta OS=Mus musculus OX=10090 GN=Tmpo PE=1 SV=4	35	19	22	10	693	75.1	8.05
Q6ZWQ7	Spcs3		Signal peptidase complex subunit 3 OS=Mus musculus OX=10090 GN=Spcs3 PE=1 SV=1	7	1	1	1	180	20.3	8.62
Q06180	Ptpn2		Tyrosine-protein phosphatase non-receptor type 2 OS=Mus musculus OX=10090 GN=Ptpn2 PE=1 SV=2	2	1	1	1	406	47.3	8.37
P17918	Pcna		Proliferating cell nuclear antigen OS=Mus musculus OX=10090 GN=Pcna PE=1 SV=2	53	11	12	11	261	28.8	4.77
Q922M5	Cdca7l		Cell division cycle-associated 7-like protein OS=Mus musculus OX=10090 GN=Cdca7l PE=1 SV=1	5	2	2	2	438	50.2	7.65
Q9CYN2	Spcs2		Signal peptidase complex subunit 2 OS=Mus musculus OX=10090 GN=Spcs2 PE=1 SV=1	13	2	2	2	226	25	8.57
Q3UVK0	Ermp1		Endoplasmic reticulum metallopeptidase 1 OS=Mus musculus OX=10090 GN=Ermp1 PE=1 SV=2	1	1	1	1	898	100.1	7.49
Q3TKT4	Smarca4		Transcription activator BRG1 OS=Mus musculus OX=10090 GN=Smarca4 PE=1 SV=1	2	3	3	3	1613	181.3	8
P25976	Ubtf		Nucleolar transcription factor 1 OS=Mus musculus OX=10090 GN=Ubtf PE=1 SV=1	16	10	12	10	765	89.5	5.76
P33174	Kif4		Chromosome-associated kinesin KIF4 OS=Mus musculus OX=10090 GN=Kif4 PE=1 SV=3	3	4	4	4	1231	139.4	6.68
O54941	Smarce1		SWI/SNF-related matrix-associated actin-dependent regulator of chromatin subfamily E member 1 OS=Mus musculus OX=10090 GN=Smarce1 PE=1 SV=1	18	7	7	7	411	46.6	4.88
Q8BJS4	Sun2		SUN domain-containing protein 2 OS=Mus musculus OX=10090 GN=Sun2 PE=1 SV=3	3	2	2	2	731	81.6	7.02
Q3THK3	Gtf2f1		General transcription factor IIF subunit 1 OS=Mus musculus OX=10090 GN=Gtf2f1 PE=1 SV=2	16	6	6	6	508	57.2	7.01
Q5XJY4	Parl		Presenilins-associated rhomboid-like protein, mitochondrial OS=Mus musculus OX=10090 GN=Parl PE=1 SV=1	2	1	1	1	377	41.9	9.92
Q8R409	Hexim1		Protein HEXIM1 OS=Mus musculus OX=10090 GN=Hexim1 PE=1 SV=1	2	1	1	1	356	40.2	5.38
Q80X82	Sympk		Symplekin OS=Mus musculus OX=10090 GN=Sympk PE=1 SV=2	5	6	6	6	1288	142.5	6.05
P70296	Pebp1		Phosphatidylethanolamine-binding protein 1 OS=Mus musculus OX=10090 GN=Pebp1 PE=1 SV=3	73	7	10	7	187	20.8	5.4
Q8R180	Ero1a		ERO1-like protein alpha OS=Mus musculus OX=10090 GN=Ero1a PE=1 SV=2	8	3	3	3	464	54.1	6.54
Q8K019	Bclaf1		Bcl-2-associated transcription factor 1 OS=Mus musculus OX=10090 GN=Bclaf1 PE=1 SV=2	14	11	12	10	919	105.9	9.99
Q99JY0	Hadhb		Trifunctional enzyme subunit beta, mitochondrial OS=Mus musculus OX=10090 GN=Hadhb PE=1 SV=1	15	7	8	7	475	51.4	9.38
Q99JW4	Lims1		LIM and senescent cell antigen-like-containing domain protein 1 OS=Mus musculus OX=10090 GN=Lims1 PE=1 SV=3	10	3	3	3	325	37.2	8.05
Q91YR1	Twf1		Twinfilin-1 OS=Mus musculus OX=10090 GN=Twf1 PE=1 SV=2	17	4	5	4	350	40.1	6.67
Q8R519	Acmsd		2-amino-3-carboxymuconate-6-semialdehyde decarboxylase OS=Mus musculus OX=10090 GN=Acmsd PE=1 SV=2	15	1	1	1	336	38	6.25
P97822	Anp32e		Acidic leucine-rich nuclear phosphoprotein 32 family member E OS=Mus musculus OX=10090 GN=Anp32e PE=1 SV=2	23	4	4	4	260	29.6	3.88
P61327	Magoh		Protein mago nashi homolog OS=Mus musculus OX=10090 GN=Magoh PE=2 SV=1	10	1	1	1	146	17.2	6.11
Q9CPY3	Cdca5		Sororin OS=Mus musculus OX=10090 GN=Cdca5 PE=1 SV=1	3	1	1	1	264	29	9.58
Q05816	Fabp5		Fatty acid-binding protein 5 OS=Mus musculus OX=10090 GN=Fabp5 PE=1 SV=3	66	6	7	6	135	15.1	6.54
Q64378	Fkbp5		Peptidyl-prolyl cis-trans isomerase FKBP5 OS=Mus musculus OX=10090 GN=Fkbp5 PE=1 SV=1	5	2	2	2	456	50.9	7.8
Q8VC70	Rbms2		RNA-binding motif, single-stranded-interacting protein 2 OS=Mus musculus OX=10090 GN=Rbms2 PE=1 SV=1	20	5	5	5	383	40.7	9.07
Q99L43	Cds2		Phosphatidate cytidylyltransferase 2 OS=Mus musculus OX=10090 GN=Cds2 PE=1 SV=1	3	1	1	1	444	51.3	7.05
P62309	Snrpg		Small nuclear ribonucleoprotein G OS=Mus musculus OX=10090 GN=Snrpg PE=1 SV=1	9	1	1	1	76	8.5	8.88
Q3TBW2	Mrpl10		39S ribosomal protein L10, mitochondrial OS=Mus musculus OX=10090 GN=Mrpl10 PE=1 SV=2	13	2	2	2	262	29.4	9.69
Q8K2Z4	Ncapd2		Condensin complex subunit 1 OS=Mus musculus OX=10090 GN=Ncapd2 PE=1 SV=2	2	2	2	2	1392	155.6	6.38
Q8VBZ3	Clptm1		Putative lipid scramblase CLPTM1 OS=Mus musculus OX=10090 GN=Clptm1 PE=1 SV=1	4	2	2	2	664	75.2	6.3
Q8BKI2	Tnrc6b		Trinucleotide repeat-containing gene 6B protein OS=Mus musculus OX=10090 GN=Tnrc6b PE=1 SV=2	1	1	1	1	1810	191.8	6.3
P06745	Gpi		Glucose-6-phosphate isomerase OS=Mus musculus OX=10090 GN=Gpi PE=1 SV=4	24	11	13	11	558	62.7	8.13
Q569E4	Ment		Protein MENT OS=Mus musculus OX=10090 GN=Ment PE=1 SV=1	2	1	1	1	350	38.1	8.09
Q78IK2	Atp5mk		ATP synthase membrane subunit K, mitochondrial OS=Mus musculus OX=10090 GN=Atp5mk PE=1 SV=1	26	1	1	1	58	6.4	9.83
Q9R0P4	Smap		Small acidic protein OS=Mus musculus OX=10090 GN=Smap PE=1 SV=1	9	1	1	1	181	20	4.82
P97310	Mcm2		DNA replication licensing factor MCM2 OS=Mus musculus OX=10090 GN=Mcm2 PE=1 SV=3	15	12	12	12	904	102	5.72
Q62261	Sptbn1		Spectrin beta chain, non-erythrocytic 1 OS=Mus musculus OX=10090 GN=Sptbn1 PE=1 SV=2	28	53	57	53	2363	274.1	5.58
Q61464	Znf638		Zinc finger protein 638 OS=Mus musculus OX=10090 GN=Znf638 PE=1 SV=2	2	2	2	2	1960	218	6.89
Q9QXK7	Cpsf3		Cleavage and polyadenylation specificity factor subunit 3 OS=Mus musculus OX=10090 GN=Cpsf3 PE=1 SV=2	6	3	3	3	684	77.5	5.6
B2RQC6	Cad		CAD protein OS=Mus musculus OX=10090 GN=Cad PE=1 SV=1	2	4	4	4	2225	243.1	6.43
O35134	Polr1a		DNA-directed RNA polymerase I subunit RPA1 OS=Mus musculus OX=10090 GN=Polr1a PE=1 SV=2	1	1	1	1	1717	194	6.93
O35685	Nudc		Nuclear migration protein nudC OS=Mus musculus OX=10090 GN=Nudc PE=1 SV=1	9	2	2	2	332	38.3	5.26
Q8K0C9	Gmds		GDP-mannose 4,6 dehydratase OS=Mus musculus OX=10090 GN=Gmds PE=1 SV=1	2	1	1	1	372	42	7.03
Q9EPL8	Ipo7		Importin-7 OS=Mus musculus OX=10090 GN=Ipo7 PE=1 SV=2	9	7	7	7	1038	119.4	4.82
Q8BX10	Pgam5		Serine/threonine-protein phosphatase PGAM5, mitochondrial OS=Mus musculus OX=10090 GN=Pgam5 PE=1 SV=1	20	5	5	5	288	32	9.04
Q91VI7	Rnh1		Ribonuclease inhibitor OS=Mus musculus OX=10090 GN=Rnh1 PE=1 SV=1	24	9	10	9	456	49.8	4.78
Q9R099	Tbl2		Transducin beta-like protein 2 OS=Mus musculus OX=10090 GN=Tbl2 PE=1 SV=2	2	1	1	1	442	49.6	9.04
Q9CQ69	Uqcrq		Cytochrome b-c1 complex subunit 8 OS=Mus musculus OX=10090 GN=Uqcrq PE=1 SV=3	28	2	2	2	82	9.8	10.26
O35609	Scamp3		Secretory carrier-associated membrane protein 3 OS=Mus musculus OX=10090 GN=Scamp3 PE=1 SV=3	8	2	3	2	349	38.4	7.64
Q8BG17	Nol12		Nucleolar protein 12 OS=Mus musculus OX=10090 GN=Nol12 PE=1 SV=1	10	2	2	2	217	25.3	10.13
P05627	Jun		Transcription factor Jun OS=Mus musculus OX=10090 GN=Jun PE=1 SV=3	11	3	3	3	334	35.9	8.75
P97379	G3bp2		Ras GTPase-activating protein-binding protein 2 OS=Mus musculus OX=10090 GN=G3bp2 PE=1 SV=2	29	11	12	10	482	54.1	5.62
O70404	Vamp8		Vesicle-associated membrane protein 8 OS=Mus musculus OX=10090 GN=Vamp8 PE=1 SV=1	12	1	1	1	101	11.4	8.19
Q6ZWV3	Rpl10		60S ribosomal protein L10 OS=Mus musculus OX=10090 GN=Rpl10 PE=1 SV=3	38	6	10	6	214	24.6	10.08
Q91VD9	Ndufs1		NADH-ubiquinone oxidoreductase 75 kDa subunit, mitochondrial OS=Mus musculus OX=10090 GN=Ndufs1 PE=1 SV=2	5	3	3	3	727	79.7	5.72
Q71LX4	Tln2		Talin-2 OS=Mus musculus OX=10090 GN=Tln2 PE=1 SV=3	4	7	8	3	2375	253.5	5.8
P57716	Ncstn		Nicastrin OS=Mus musculus OX=10090 GN=Ncstn PE=1 SV=3	2	1	1	1	708	78.4	6.09
P30412	Ppic		Peptidyl-prolyl cis-trans isomerase C OS=Mus musculus OX=10090 GN=Ppic PE=1 SV=1	6	1	1	1	212	22.8	7.5
Q9CYH6	Rrs1		Ribosome biogenesis regulatory protein homolog OS=Mus musculus OX=10090 GN=Rrs1 PE=1 SV=1	7	2	2	2	365	41.5	10.77
Q9D7N3	Mrps9		28S ribosomal protein S9, mitochondrial OS=Mus musculus OX=10090 GN=Mrps9 PE=1 SV=3	3	1	1	1	390	44.9	8.81
Q9QWT9	Kifc1		Kinesin-like protein KIFC1 OS=Mus musculus OX=10090 GN=Kifc1 PE=1 SV=2	6	4	4	4	674	74.1	8.72
P61164	Actr1a		Alpha-centractin OS=Mus musculus OX=10090 GN=Actr1a PE=1 SV=1	13	5	5	5	376	42.6	6.64
Q91XD6	Vps36		Vacuolar protein-sorting-associated protein 36 OS=Mus musculus OX=10090 GN=Vps36 PE=1 SV=1	3	1	1	1	386	43.7	7.15
Q60875	Arhgef2		Rho guanine nucleotide exchange factor 2 OS=Mus musculus OX=10090 GN=Arhgef2 PE=1 SV=4	3	3	3	3	985	111.9	7.25
Q9R0L7	Akap8l		A-kinase anchor protein 8-like OS=Mus musculus OX=10090 GN=Akap8l PE=1 SV=1	1	1	1	1	642	71.4	5.05
Q9Z2U1	Psma5		Proteasome subunit alpha type-5 OS=Mus musculus OX=10090 GN=Psma5 PE=1 SV=1	50	8	9	8	241	26.4	4.79
Q6PHQ8	Naa35		N-alpha-acetyltransferase 35, NatC auxiliary subunit OS=Mus musculus OX=10090 GN=Naa35 PE=1 SV=1	1	1	1	1	725	83.3	7.3
Q6PB44	Ptpn23		Tyrosine-protein phosphatase non-receptor type 23 OS=Mus musculus OX=10090 GN=Ptpn23 PE=1 SV=2	1	1	1	1	1692	185.1	6.8
Q5XJY5	Arcn1		Coatomer subunit delta OS=Mus musculus OX=10090 GN=Arcn1 PE=1 SV=2	12	6	6	6	511	57.2	6.21
Q9D1E6	Tbcb		Tubulin-folding cofactor B OS=Mus musculus OX=10090 GN=Tbcb PE=1 SV=2	8	2	2	2	244	27.4	5.24
P28740	Kif2a		Kinesin-like protein KIF2A OS=Mus musculus OX=10090 GN=Kif2a PE=1 SV=2	6	5	5	5	705	79.7	6.73
Q09XV5	Chd8		Chromodomain-helicase-DNA-binding protein 8 OS=Mus musculus OX=10090 GN=Chd8 PE=1 SV=1	0	1	1	1	2582	290.7	6.42
Q9ESD7	Dysf		Dysferlin OS=Mus musculus OX=10090 GN=Dysf PE=1 SV=3	1	1	1	1	2090	237.8	5.6
Q99LB2	Dhrs4		Dehydrogenase/reductase SDR family member 4 OS=Mus musculus OX=10090 GN=Dhrs4 PE=1 SV=3	10	2	2	2	279	29.9	9.38
Q99104	Myo5a		Unconventional myosin-Va OS=Mus musculus OX=10090 GN=Myo5a PE=1 SV=2	6	10	10	10	1853	215.4	8.63
O70194	Eif3d		Eukaryotic translation initiation factor 3 subunit D OS=Mus musculus OX=10090 GN=Eif3d PE=1 SV=2	19	9	10	9	548	63.9	6.05
P31266	Rbpj		Recombining binding protein suppressor of hairless OS=Mus musculus OX=10090 GN=Rbpj PE=1 SV=1	10	5	5	5	526	58.5	8.13
Q9DB20	Atp5po		ATP synthase subunit O, mitochondrial OS=Mus musculus OX=10090 GN=Atp5po PE=1 SV=1	39	6	7	6	213	23.3	9.99
P23798	Pcgf2		Polycomb group RING finger protein 2 OS=Mus musculus OX=10090 GN=Pcgf2 PE=1 SV=2	2	1	1	1	342	37.7	7.93
D3YVL2	Cfap70		Cilia- and flagella-associated protein 70 OS=Mus musculus OX=10090 GN=Cfap70 PE=1 SV=2	1	1	1	1	1141	128.2	5.53
Q6ZWQ0	Syne2		Nesprin-2 OS=Mus musculus OX=10090 GN=Syne2 PE=1 SV=2	0	1	1	1	6874	782.2	5.33
Q9R0L6	Pcm1		Pericentriolar material 1 protein OS=Mus musculus OX=10090 GN=Pcm1 PE=1 SV=2	3	6	6	6	2025	228.7	5.01
Q9DCA2	Mrps11		28S ribosomal protein S11, mitochondrial OS=Mus musculus OX=10090 GN=Mrps11 PE=1 SV=2	5	1	1	1	191	20.2	10.77
Q9CQE1	Nipsnap3b		Protein NipSnap homolog 3B OS=Mus musculus OX=10090 GN=Nipsnap3b PE=1 SV=1	4	1	1	1	247	28.3	9.48
O55028	Bckdk		[3-methyl-2-oxobutanoate dehydrogenase [lipoamide]] kinase, mitochondrial OS=Mus musculus OX=10090 GN=Bckdk PE=1 SV=1	2	1	1	1	412	46.6	8.91
Q99PP7	Trim33		E3 ubiquitin-protein ligase TRIM33 OS=Mus musculus OX=10090 GN=Trim33 PE=1 SV=2	1	1	1	1	1142	123.8	6.74
P43275	H1-1		Histone H1.1 OS=Mus musculus OX=10090 GN=H1-1 PE=1 SV=2	14	2	2	1	213	21.8	10.93
Q922U1	Prpf3		U4/U6 small nuclear ribonucleoprotein Prp3 OS=Mus musculus OX=10090 GN=Prpf3 PE=1 SV=1	4	3	3	3	683	77.4	9.5
P97315	Csrp1		Cysteine and glycine-rich protein 1 OS=Mus musculus OX=10090 GN=Csrp1 PE=1 SV=3	9	1	1	1	193	20.6	8.57
Q3THE2	Myl12b		Myosin regulatory light chain 12B OS=Mus musculus OX=10090 GN=Myl12b PE=1 SV=2	31	5	6	5	172	19.8	4.84
Q9CY66	Gar1		H/ACA ribonucleoprotein complex subunit 1 OS=Mus musculus OX=10090 GN=Gar1 PE=1 SV=1	12	2	2	2	231	23.5	11.02
Q9DAW6	Prpf4		U4/U6 small nuclear ribonucleoprotein Prp4 OS=Mus musculus OX=10090 GN=Prpf4 PE=1 SV=1	7	3	3	3	521	58.3	7.28
P43247	Msh2		DNA mismatch repair protein Msh2 OS=Mus musculus OX=10090 GN=Msh2 PE=1 SV=1	5	4	4	4	935	104.1	5.96
Q8BT60	Cpne3		Copine-3 OS=Mus musculus OX=10090 GN=Cpne3 PE=1 SV=2	14	7	7	5	533	59.5	5.78
Q80X90	Flnb		Filamin-B OS=Mus musculus OX=10090 GN=Flnb PE=1 SV=3	30	57	60	49	2602	277.7	5.71
Q99KN9	Clint1		Clathrin interactor 1 OS=Mus musculus OX=10090 GN=Clint1 PE=1 SV=2	7	4	4	4	631	68.5	6.25
Q99KH8	Stk24		Serine/threonine-protein kinase 24 OS=Mus musculus OX=10090 GN=Stk24 PE=1 SV=1	4	1	1	1	431	47.9	5.43
Q7TQK1	Ints7		Integrator complex subunit 7 OS=Mus musculus OX=10090 GN=Ints7 PE=1 SV=1	2	2	2	2	966	106.8	8.22
Q9QXT0	Cnpy2		Protein canopy homolog 2 OS=Mus musculus OX=10090 GN=Cnpy2 PE=1 SV=1	30	4	4	4	182	20.8	5.07
Q8BGQ7	Aars1		Alanine--tRNA ligase, cytoplasmic OS=Mus musculus OX=10090 GN=Aars1 PE=1 SV=1	14	11	11	11	968	106.8	5.67
Q811D0	Dlg1		Disks large homolog 1 OS=Mus musculus OX=10090 GN=Dlg1 PE=1 SV=1	5	4	5	4	905	100.1	5.8
Q07417	Acads		Short-chain specific acyl-CoA dehydrogenase, mitochondrial OS=Mus musculus OX=10090 GN=Acads PE=1 SV=2	11	3	3	3	412	44.9	8.47
Q9CQU3	Rer1		Protein RER1 OS=Mus musculus OX=10090 GN=Rer1 PE=1 SV=1	6	1	1	1	196	23	9.51
Q8C1D8	Iws1		Protein IWS1 homolog OS=Mus musculus OX=10090 GN=Iws1 PE=1 SV=1	1	1	2	1	766	85.2	4.67
Q8JZM7	Cdc73		Parafibromin OS=Mus musculus OX=10090 GN=Cdc73 PE=1 SV=1	2	1	1	1	531	60.5	9.61
P31324	Prkar2b		cAMP-dependent protein kinase type II-beta regulatory subunit OS=Mus musculus OX=10090 GN=Prkar2b PE=1 SV=3	4	1	1	1	416	46.1	4.98
P62331	Arf6		ADP-ribosylation factor 6 OS=Mus musculus OX=10090 GN=Arf6 PE=1 SV=2	12	2	2	2	175	20.1	8.95
Q9D1D4	Tmed10		Transmembrane emp24 domain-containing protein 10 OS=Mus musculus OX=10090 GN=Tmed10 PE=1 SV=1	22	4	5	4	219	24.9	6.7
Q8BIF9	Znf787		Zinc finger protein 787 OS=Mus musculus OX=10090 GN=Znf787 PE=2 SV=3	4	1	1	1	381	40.5	8.24
Q91VR7	Map1lc3a		Microtubule-associated proteins 1A/1B light chain 3A OS=Mus musculus OX=10090 GN=Map1lc3a PE=1 SV=1	23	3	3	1	121	14.3	8.68
Q9DC48	Cdc40		Pre-mRNA-processing factor 17 OS=Mus musculus OX=10090 GN=Cdc40 PE=1 SV=1	1	1	1	1	579	65.4	7.06
Q9EQQ2	Yipf5		Protein YIPF5 OS=Mus musculus OX=10090 GN=Yipf5 PE=1 SV=1	8	2	2	2	257	27.9	4.36
Q8BJZ4	Mrps35		28S ribosomal protein S35, mitochondrial OS=Mus musculus OX=10090 GN=Mrps35 PE=1 SV=2	4	1	1	1	320	36	8.59
Q8K301	Ddx52		Probable ATP-dependent RNA helicase DDX52 OS=Mus musculus OX=10090 GN=Ddx52 PE=2 SV=2	3	2	2	2	598	67.4	9.57
D3Z7P3	Gls		Glutaminase kidney isoform, mitochondrial OS=Mus musculus OX=10090 GN=Gls PE=1 SV=1	13	8	9	8	674	73.9	7.99
Q8BVQ5	Ppme1		Protein phosphatase methylesterase 1 OS=Mus musculus OX=10090 GN=Ppme1 PE=1 SV=5	2	1	1	1	386	42.2	5.97
Q9QYR6	Map1a		Microtubule-associated protein 1A OS=Mus musculus OX=10090 GN=Map1a PE=1 SV=2	2	5	5	4	2776	300	5
Q9QXA5	Lsm4		U6 snRNA-associated Sm-like protein LSm4 OS=Mus musculus OX=10090 GN=Lsm4 PE=1 SV=1	18	3	3	3	137	15.1	10.05
Q61166	Mapre1		Microtubule-associated protein RP/EB family member 1 OS=Mus musculus OX=10090 GN=Mapre1 PE=1 SV=3	26	6	6	6	268	30	5.22
Q9JMG7	Hdgfl3		Hepatoma-derived growth factor-related protein 3 OS=Mus musculus OX=10090 GN=Hdgfl3 PE=1 SV=2	32	5	6	4	202	22.4	8.4
P45481	Crebbp		Histone lysine acetyltransferase CREBBP OS=Mus musculus OX=10090 GN=Crebbp PE=1 SV=3	0	1	1	1	2441	265.3	8.54
Q8K363	Ddx18		ATP-dependent RNA helicase DDX18 OS=Mus musculus OX=10090 GN=Ddx18 PE=1 SV=1	15	8	8	8	660	74.1	9.52
O35129	Phb2		Prohibitin-2 OS=Mus musculus OX=10090 GN=Phb2 PE=1 SV=1	57	15	17	15	299	33.3	9.83
P19157	Gstp1		Glutathione S-transferase P 1 OS=Mus musculus OX=10090 GN=Gstp1 PE=1 SV=2	20	3	4	3	210	23.6	7.87
Q9CYG7	Tomm34		Mitochondrial import receptor subunit TOM34 OS=Mus musculus OX=10090 GN=Tomm34 PE=1 SV=1	5	1	1	1	309	34.3	9.14
P11157	Rrm2		Ribonucleoside-diphosphate reductase subunit M2 OS=Mus musculus OX=10090 GN=Rrm2 PE=1 SV=1	4	1	1	1	390	45.1	5.45
Q9CR20	Ier3ip1		Immediate early response 3-interacting protein 1 OS=Mus musculus OX=10090 GN=Ier3ip1 PE=3 SV=1	24	1	1	1	82	9	8.22
Q8K1N4	Spats2		Spermatogenesis-associated serine-rich protein 2 OS=Mus musculus OX=10090 GN=Spats2 PE=1 SV=1	9	4	4	4	545	58.9	9
Q62189	Snrpa		U1 small nuclear ribonucleoprotein A OS=Mus musculus OX=10090 GN=Snrpa PE=1 SV=3	16	5	5	3	287	31.8	9.8
Q9DBR7	Ppp1r12a		Protein phosphatase 1 regulatory subunit 12A OS=Mus musculus OX=10090 GN=Ppp1r12a PE=1 SV=2	13	11	11	11	1029	114.9	5.49
P97372	Psme2		Proteasome activator complex subunit 2 OS=Mus musculus OX=10090 GN=Psme2 PE=1 SV=4	10	2	2	2	239	27	5.76
O08538	Angpt1		Angiopoietin-1 OS=Mus musculus OX=10090 GN=Angpt1 PE=1 SV=2	6	1	1	1	498	57.5	6.76
Q9R059	Fhl3		Four and a half LIM domains protein 3 OS=Mus musculus OX=10090 GN=Fhl3 PE=1 SV=2	6	2	2	2	289	31.8	6.2
Q9ET54	Palld		Palladin OS=Mus musculus OX=10090 GN=Palld PE=1 SV=2	2	3	3	3	1408	152	6.25
Q8BH74	Nup107		Nuclear pore complex protein Nup107 OS=Mus musculus OX=10090 GN=Nup107 PE=1 SV=1	3	3	3	3	926	106.7	5.43
P53994	Rab2a		Ras-related protein Rab-2A OS=Mus musculus OX=10090 GN=Rab2a PE=1 SV=1	17	3	3	3	212	23.5	6.54
Q8CGZ0	Cherp		Calcium homeostasis endoplasmic reticulum protein OS=Mus musculus OX=10090 GN=Cherp PE=1 SV=1	9	6	6	6	936	106.1	9.14
P19096	Fasn		Fatty acid synthase OS=Mus musculus OX=10090 GN=Fasn PE=1 SV=2	23	41	42	41	2504	272.3	6.58
O70324	Slc16a2		Monocarboxylate transporter 8 OS=Mus musculus OX=10090 GN=Slc16a2 PE=1 SV=2	5	1	1	1	545	60	5.59
Q8VCM8	Ncln		BOS complex subunit NCLN OS=Mus musculus OX=10090 GN=Ncln PE=1 SV=2	6	4	4	4	563	62.9	6.49
Q9CQN6	Tmem14c		Transmembrane protein 14C OS=Mus musculus OX=10090 GN=Tmem14c PE=1 SV=1	10	1	1	1	114	11.6	9.7
P40336	Vps26a		Vacuolar protein sorting-associated protein 26A OS=Mus musculus OX=10090 GN=Vps26a PE=1 SV=1	9	2	2	2	327	38.1	6.57
P58059	Mrps21		28S ribosomal protein S21, mitochondrial OS=Mus musculus OX=10090 GN=Mrps21 PE=1 SV=1	24	2	2	2	87	10.6	10.32
Q6NV83	U2surp		U2 snRNP-associated SURP motif-containing protein OS=Mus musculus OX=10090 GN=U2surp PE=1 SV=3	10	8	10	8	1029	118.2	8.47
Q8BK64	Ahsa1		Activator of 90 kDa heat shock protein ATPase homolog 1 OS=Mus musculus OX=10090 GN=Ahsa1 PE=1 SV=2	15	4	4	4	338	38.1	5.53
Q7TNE3	Spag7		Sperm-associated antigen 7 OS=Mus musculus OX=10090 GN=Spag7 PE=1 SV=1	10	1	1	1	227	25.9	7.43
P56546	Ctbp2		C-terminal-binding protein 2 OS=Mus musculus OX=10090 GN=Ctbp2 PE=1 SV=2	7	2	2	2	445	48.9	6.95
Q8R050	Gspt1		Eukaryotic peptide chain release factor GTP-binding subunit ERF3A OS=Mus musculus OX=10090 GN=Gspt1 PE=1 SV=2	1	1	1	1	636	68.6	5.21
P70404	Idh3g		Isocitrate dehydrogenase [NAD] subunit gamma 1, mitochondrial OS=Mus musculus OX=10090 GN=Idh3g PE=1 SV=1	6	2	2	2	393	42.8	9.01
P48678	Lmna		Prelamin-A/C OS=Mus musculus OX=10090 GN=Lmna PE=1 SV=2	59	37	52	36	665	74.2	6.98
Q6P5E4	Uggt1		UDP-glucose:glycoprotein glucosyltransferase 1 OS=Mus musculus OX=10090 GN=Uggt1 PE=1 SV=4	2	3	3	3	1551	176.3	5.62
Q8VEB1	Grk5		G protein-coupled receptor kinase 5 OS=Mus musculus OX=10090 GN=Grk5 PE=1 SV=2	2	1	1	1	590	67.7	8.19
O08788	Dctn1		Dynactin subunit 1 OS=Mus musculus OX=10090 GN=Dctn1 PE=1 SV=3	2	2	2	2	1281	141.6	5.9
Q8K1N2	Phldb2		Pleckstrin homology-like domain family B member 2 OS=Mus musculus OX=10090 GN=Phldb2 PE=1 SV=2	1	1	1	1	1249	141.4	7.68
P50446	Krt6a		Keratin, type II cytoskeletal 6A OS=Mus musculus OX=10090 GN=Krt6a PE=1 SV=3	28	20	27	7	553	59.3	7.94
Q9JIF0	Prmt1		Protein arginine N-methyltransferase 1 OS=Mus musculus OX=10090 GN=Prmt1 PE=1 SV=1	31	9	9	9	371	42.4	5.43
Q8R016	Blmh		Bleomycin hydrolase OS=Mus musculus OX=10090 GN=Blmh PE=1 SV=1	2	1	1	1	455	52.5	6.48
A2AAY5	Sh3pxd2b		SH3 and PX domain-containing protein 2B OS=Mus musculus OX=10090 GN=Sh3pxd2b PE=1 SV=1	2	2	2	2	908	101.5	8.66
Q5F2E7	Nufip2		FMR1-interacting protein NUFIP2 OS=Mus musculus OX=10090 GN=Nufip2 PE=1 SV=1	8	4	4	4	692	75.6	8.7
Q9WTL4	Insrr		Insulin receptor-related protein OS=Mus musculus OX=10090 GN=Insrr PE=1 SV=2	1	1	1	1	1300	144.8	6.64
Q9ERG0	Lima1		LIM domain and actin-binding protein 1 OS=Mus musculus OX=10090 GN=Lima1 PE=1 SV=3	21	14	14	14	753	84	6.6
P27773	Pdia3		Protein disulfide-isomerase A3 OS=Mus musculus OX=10090 GN=Pdia3 PE=1 SV=2	51	25	29	25	505	56.6	6.21
O08997	Atox1		Copper transport protein ATOX1 OS=Mus musculus OX=10090 GN=Atox1 PE=1 SV=1	12	1	1	1	68	7.3	6.51
P97807	Fh		Fumarate hydratase, mitochondrial OS=Mus musculus OX=10090 GN=Fh PE=1 SV=3	18	6	6	6	507	54.3	9.04
Q99KW3	Triobp		TRIO and F-actin-binding protein OS=Mus musculus OX=10090 GN=Triobp PE=1 SV=3	2	4	4	3	2014	223.2	8.06
Q9D4J7	Phf6		PHD finger protein 6 OS=Mus musculus OX=10090 GN=Phf6 PE=1 SV=1	5	2	2	2	364	41.1	8.73
P50544	Acadvl		Very long-chain specific acyl-CoA dehydrogenase, mitochondrial OS=Mus musculus OX=10090 GN=Acadvl PE=1 SV=3	24	12	12	12	656	70.8	8.75
O55242	Sigmar1		Sigma non-opioid intracellular receptor 1 OS=Mus musculus OX=10090 GN=Sigmar1 PE=1 SV=1	6	1	1	1	223	25.2	5.91
P27661	H2ax		Histone H2AX OS=Mus musculus OX=10090 GN=H2ax PE=1 SV=2	38	5	8	2	143	15.1	10.74
Q9CQN1	Trap1		Heat shock protein 75 kDa, mitochondrial OS=Mus musculus OX=10090 GN=Trap1 PE=1 SV=1	22	14	14	13	706	80.2	6.68
Q99MD9	Nasp		Nuclear autoantigenic sperm protein OS=Mus musculus OX=10090 GN=Nasp PE=1 SV=2	10	8	8	8	773	83.9	4.37
Q8BK67	Rcc2		Protein RCC2 OS=Mus musculus OX=10090 GN=Rcc2 PE=1 SV=1	43	17	21	17	520	55.9	8.72
P15116	Cdh2		Cadherin-2 OS=Mus musculus OX=10090 GN=Cdh2 PE=1 SV=2	1	1	1	1	906	99.7	4.78
Q9Z0J0	Npc2		NPC intracellular cholesterol transporter 2 OS=Mus musculus OX=10090 GN=Npc2 PE=1 SV=1	19	2	3	2	149	16.4	7.68
Q8R1B4	Eif3c		Eukaryotic translation initiation factor 3 subunit C OS=Mus musculus OX=10090 GN=Eif3c PE=1 SV=1	25	20	22	20	911	105.5	5.78
Q8CFE2	Hpf1		Histone PARylation factor 1 OS=Mus musculus OX=10090 GN=Hpf1 PE=1 SV=1	3	1	1	1	346	39.3	7.69
Q9JIF7	Copb1		Coatomer subunit beta OS=Mus musculus OX=10090 GN=Copb1 PE=1 SV=1	8	6	6	6	953	107	6
Q8C6G8	Wdr26		WD repeat-containing protein 26 OS=Mus musculus OX=10090 GN=Wdr26 PE=1 SV=3	1	1	1	1	641	70.5	6.16
Q9Z0W3	Nup160		Nuclear pore complex protein Nup160 OS=Mus musculus OX=10090 GN=Nup160 PE=1 SV=2	1	1	1	1	1402	158.1	5.52
P10854	H2bc14		Histone H2B type 1-M OS=Mus musculus OX=10090 GN=H2bc14 PE=1 SV=2	53	8	11	1	126	13.9	10.32
O35491	Clk2		Dual specificity protein kinase CLK2 OS=Mus musculus OX=10090 GN=Clk2 PE=1 SV=2	2	1	1	1	499	60	9.45
Q8R2U0	Seh1l		Nucleoporin SEH1 OS=Mus musculus OX=10090 GN=Seh1l PE=2 SV=1	3	1	1	1	360	39.7	8.05
Q9D6T0	Nosip		Nitric oxide synthase-interacting protein OS=Mus musculus OX=10090 GN=Nosip PE=1 SV=1	4	1	1	1	301	33.2	8.62
Q8CIN4	Pak2		Serine/threonine-protein kinase PAK 2 OS=Mus musculus OX=10090 GN=Pak2 PE=1 SV=1	7	3	3	3	524	57.9	5.77
Q9Z204	Hnrnpc		Heterogeneous nuclear ribonucleoproteins C1/C2 OS=Mus musculus OX=10090 GN=Hnrnpc PE=1 SV=1	41	12	14	12	313	34.4	5.05
Q99KG3	Rbm10		RNA-binding protein 10 OS=Mus musculus OX=10090 GN=Rbm10 PE=1 SV=1	4	3	3	3	930	103.4	5.92
P14152	Mdh1		Malate dehydrogenase, cytoplasmic OS=Mus musculus OX=10090 GN=Mdh1 PE=1 SV=3	16	5	5	5	334	36.5	6.58
Q91VW9	Zkscan3		Zinc finger protein with KRAB and SCAN domains 3 OS=Mus musculus OX=10090 GN=Zkscan3 PE=1 SV=1	2	1	1	1	553	62.6	6
P97855	G3bp1		Ras GTPase-activating protein-binding protein 1 OS=Mus musculus OX=10090 GN=G3bp1 PE=1 SV=1	41	13	21	12	465	51.8	5.59
Q62351	Tfrc		Transferrin receptor protein 1 OS=Mus musculus OX=10090 GN=Tfrc PE=1 SV=1	15	10	10	10	763	85.7	6.57
P62334	Psmc6		26S proteasome regulatory subunit 10B OS=Mus musculus OX=10090 GN=Psmc6 PE=1 SV=1	28	10	10	10	389	44.1	7.49
Q8R081	Hnrnpl		Heterogeneous nuclear ribonucleoprotein L OS=Mus musculus OX=10090 GN=Hnrnpl PE=1 SV=2	45	19	29	19	586	63.9	8.1
P83741	Wnk1		Serine/threonine-protein kinase WNK1 OS=Mus musculus OX=10090 GN=Wnk1 PE=1 SV=2	1	1	1	1	2377	250.8	6.43
Q9WUM4	Coro1c		Coronin-1C OS=Mus musculus OX=10090 GN=Coro1c PE=1 SV=2	20	11	12	11	474	53.1	7.08
P14873	Map1b		Microtubule-associated protein 1B OS=Mus musculus OX=10090 GN=Map1b PE=1 SV=2	23	40	43	39	2464	270.1	4.83
P30999	Ctnnd1		Catenin delta-1 OS=Mus musculus OX=10090 GN=Ctnnd1 PE=1 SV=2	6	5	5	5	938	104.9	6.87
P09405	Ncl		Nucleolin OS=Mus musculus OX=10090 GN=Ncl PE=1 SV=2	38	33	44	33	707	76.7	4.75
E9PVA8	Gcn1		eIF-2-alpha kinase activator GCN1 OS=Mus musculus OX=10090 GN=Gcn1 PE=1 SV=1	2	6	6	6	2671	292.8	7.36
Q05D44	Eif5b		Eukaryotic translation initiation factor 5B OS=Mus musculus OX=10090 GN=Eif5b PE=1 SV=2	16	16	17	16	1216	137.5	5.59
P58774	Tpm2		Tropomyosin beta chain OS=Mus musculus OX=10090 GN=Tpm2 PE=1 SV=1	38	16	26	6	284	32.8	4.7
Q6PGC1	Dhx29		ATP-dependent RNA helicase DHX29 OS=Mus musculus OX=10090 GN=Dhx29 PE=1 SV=1	3	3	3	3	1365	153.9	7.94
Q8C1B7	Septin11		Septin-11 OS=Mus musculus OX=10090 GN=Septin11 PE=1 SV=4	44	14	17	11	431	49.7	6.68
Q9WTX8	Mad1l1		Mitotic spindle assembly checkpoint protein MAD1 OS=Mus musculus OX=10090 GN=Mad1l1 PE=1 SV=1	7	5	5	5	717	83.5	5.66
P60229	Eif3e		Eukaryotic translation initiation factor 3 subunit E OS=Mus musculus OX=10090 GN=Eif3e PE=1 SV=1	36	14	14	14	445	52.2	6.04
Q60597	Ogdh		2-oxoglutarate dehydrogenase complex component E1 OS=Mus musculus OX=10090 GN=Ogdh PE=1 SV=3	23	18	18	18	1023	116.4	6.83
P14719	Il1rl1		Interleukin-1 receptor-like 1 OS=Mus musculus OX=10090 GN=Il1rl1 PE=1 SV=2	10	4	4	4	567	64.8	8.22
O08749	Dld		Dihydrolipoyl dehydrogenase, mitochondrial OS=Mus musculus OX=10090 GN=Dld PE=1 SV=2	28	11	14	11	509	54.2	7.9
A2AJI0	Map7d1		MAP7 domain-containing protein 1 OS=Mus musculus OX=10090 GN=Map7d1 PE=1 SV=1	4	3	3	3	846	93.2	10.15
Q99JI6	Rap1b		Ras-related protein Rap-1b OS=Mus musculus OX=10090 GN=Rap1b PE=1 SV=2	20	4	4	4	184	20.8	5.78
Q921F4	Hnrnpll		Heterogeneous nuclear ribonucleoprotein L-like OS=Mus musculus OX=10090 GN=Hnrnpll PE=1 SV=3	29	12	12	12	591	64.1	5.85
Q91YQ5	Rpn1		Dolichyl-diphosphooligosaccharide--protein glycosyltransferase subunit 1 OS=Mus musculus OX=10090 GN=Rpn1 PE=1 SV=1	49	24	27	24	608	68.5	6.46
A2A6Q5	Cdc27		Cell division cycle protein 27 homolog OS=Mus musculus OX=10090 GN=Cdc27 PE=1 SV=1	2	2	2	2	825	91.8	7.02
Q9WV54	Asah1		Acid ceramidase OS=Mus musculus OX=10090 GN=Asah1 PE=1 SV=1	3	1	1	1	394	44.6	8.46
Q8BFR4	Gns		N-acetylglucosamine-6-sulfatase OS=Mus musculus OX=10090 GN=Gns PE=1 SV=1	3	2	2	2	544	61.1	8.24
Q5SF07	Igf2bp2		Insulin-like growth factor 2 mRNA-binding protein 2 OS=Mus musculus OX=10090 GN=Igf2bp2 PE=1 SV=1	22	11	13	9	592	65.5	8.03
O70554	Sprr2b		Small proline-rich protein 2B OS=Mus musculus OX=10090 GN=Sprr2b PE=2 SV=1	9	1	2	1	98	10.7	7.46
Q9ERK4	Cse1l		Exportin-2 OS=Mus musculus OX=10090 GN=Cse1l PE=1 SV=1	7	6	6	6	971	110.4	5.77
Q9CZD3	Gars1		Glycine--tRNA ligase OS=Mus musculus OX=10090 GN=Gars1 PE=1 SV=1	13	9	10	9	729	81.8	6.65
P62874	Gnb1		Guanine nucleotide-binding protein G(I)/G(S)/G(T) subunit beta-1 OS=Mus musculus OX=10090 GN=Gnb1 PE=1 SV=3	36	10	11	4	340	37.4	6
Q9CQU0	Txndc12		Thioredoxin domain-containing protein 12 OS=Mus musculus OX=10090 GN=Txndc12 PE=1 SV=1	13	2	3	2	170	19	5.26
E9Q0S6	Tns1		Tensin-1 OS=Mus musculus OX=10090 GN=Tns1 PE=1 SV=1	1	1	1	1	1888	201.3	7.75
P45591	Cfl2		Cofilin-2 OS=Mus musculus OX=10090 GN=Cfl2 PE=1 SV=1	50	7	9	5	166	18.7	7.88
P62137	Ppp1ca		Serine/threonine-protein phosphatase PP1-alpha catalytic subunit OS=Mus musculus OX=10090 GN=Ppp1ca PE=1 SV=1	28	7	10	1	330	37.5	6.33
Q64008	Rab34		Ras-related protein Rab-34 OS=Mus musculus OX=10090 GN=Rab34 PE=1 SV=2	4	1	1	1	259	29.1	8.27
P29391	Ftl1		Ferritin light chain 1 OS=Mus musculus OX=10090 GN=Ftl1 PE=1 SV=2	23	3	3	3	183	20.8	6
P60843	Eif4a1		Eukaryotic initiation factor 4A-I OS=Mus musculus OX=10090 GN=Eif4a1 PE=1 SV=1	50	20	28	11	406	46.1	5.48
Q3U9G9	Lbr		Delta(14)-sterol reductase LBR OS=Mus musculus OX=10090 GN=Lbr PE=1 SV=2	19	13	14	13	626	71.4	9.36
P07742	Rrm1		Ribonucleoside-diphosphate reductase large subunit OS=Mus musculus OX=10090 GN=Rrm1 PE=1 SV=2	10	7	7	7	792	90.2	6.7
Q78IK4	Apool		MICOS complex subunit Mic27 OS=Mus musculus OX=10090 GN=Apool PE=1 SV=1	4	1	1	1	265	29.2	9.31
Q91V81	Rbm42		RNA-binding protein 42 OS=Mus musculus OX=10090 GN=Rbm42 PE=1 SV=2	5	2	2	2	478	50.2	9.63
P08043	Zfp2		Zinc finger protein ZFP2 OS=Mus musculus OX=10090 GN=Zfp2 PE=2 SV=2	5	2	2	1	459	52.5	8.82
P46061	Rangap1		Ran GTPase-activating protein 1 OS=Mus musculus OX=10090 GN=Rangap1 PE=1 SV=2	22	12	12	12	589	63.5	4.68
Q62048	Pea15		Astrocytic phosphoprotein PEA-15 OS=Mus musculus OX=10090 GN=Pea15 PE=1 SV=1	8	1	1	1	130	15	5.02
Q64337	Sqstm1		Sequestosome-1 OS=Mus musculus OX=10090 GN=Sqstm1 PE=1 SV=1	15	4	4	4	442	48.1	5.21
Q8BLF1	Nceh1		Neutral cholesterol ester hydrolase 1 OS=Mus musculus OX=10090 GN=Nceh1 PE=1 SV=1	2	1	1	1	408	45.7	7.05
P23475	Xrcc6		X-ray repair cross-complementing protein 6 OS=Mus musculus OX=10090 GN=Xrcc6 PE=1 SV=5	5	2	2	2	608	69.4	6.79
Q6A0A2	Larp4b		La-related protein 4B OS=Mus musculus OX=10090 GN=Larp4b PE=1 SV=2	2	1	1	1	741	81.6	7.49
Q9CPT4	Mydgf		Myeloid-derived growth factor OS=Mus musculus OX=10090 GN=Mydgf PE=1 SV=1	16	2	2	2	166	18	6.79
Q9JJV2	Pfn2		Profilin-2 OS=Mus musculus OX=10090 GN=Pfn2 PE=1 SV=3	6	1	1	1	140	15	6.99
P26350	Ptma		Prothymosin alpha OS=Mus musculus OX=10090 GN=Ptma PE=1 SV=2	36	7	10	7	111	12.2	3.79
A2RST1	Mgst2		Microsomal glutathione S-transferase 2 OS=Mus musculus OX=10090 GN=Mgst2 PE=2 SV=1	18	2	2	2	147	16.8	9.83
Q9QZH6	Ecsit		Evolutionarily conserved signaling intermediate in Toll pathway, mitochondrial OS=Mus musculus OX=10090 GN=Ecsit PE=1 SV=2	3	1	1	1	435	49.8	6.6
Q03265	Atp5f1a		ATP synthase subunit alpha, mitochondrial OS=Mus musculus OX=10090 GN=Atp5f1a PE=1 SV=1	49	21	29	21	553	59.7	9.19
Q8VE22	Mrps23		28S ribosomal protein S23, mitochondrial OS=Mus musculus OX=10090 GN=Mrps23 PE=1 SV=1	14	2	2	2	177	20.3	8.59
O55023	Impa1		Inositol monophosphatase 1 OS=Mus musculus OX=10090 GN=Impa1 PE=1 SV=1	4	1	1	1	277	30.4	5.19
P20108	Prdx3		Thioredoxin-dependent peroxide reductase, mitochondrial OS=Mus musculus OX=10090 GN=Prdx3 PE=1 SV=1	22	4	5	4	257	28.1	7.58
P35288	Rab23		Ras-related protein Rab-23 OS=Mus musculus OX=10090 GN=Rab23 PE=1 SV=2	4	1	1	1	237	26.7	6.79
Q9WUU7	Ctsz		Cathepsin Z OS=Mus musculus OX=10090 GN=Ctsz PE=1 SV=1	2	1	1	1	306	34	6.6
Q99MV1	Tdrd1		Tudor domain-containing protein 1 OS=Mus musculus OX=10090 GN=Tdrd1 PE=1 SV=2	1	1	1	1	1172	129.6	5.81
Q5FWK3	Arhgap1		Rho GTPase-activating protein 1 OS=Mus musculus OX=10090 GN=Arhgap1 PE=1 SV=1	3	1	1	1	439	50.4	6.44
Q9DBJ1	Pgam1		Phosphoglycerate mutase 1 OS=Mus musculus OX=10090 GN=Pgam1 PE=1 SV=3	51	10	18	10	254	28.8	7.18
P19536	Cox5b		Cytochrome c oxidase subunit 5B, mitochondrial OS=Mus musculus OX=10090 GN=Cox5b PE=1 SV=1	31	4	5	4	128	13.8	8.38
Q8VDM6	Hnrnpul1		Heterogeneous nuclear ribonucleoprotein U-like protein 1 OS=Mus musculus OX=10090 GN=Hnrnpul1 PE=1 SV=1	3	2	2	2	859	95.9	6.58
Q6A0A9	FAM120A		Constitutive coactivator of PPAR-gamma-like protein 1 OS=Mus musculus OX=10090 GN=FAM120A PE=1 SV=2	3	2	2	2	1112	121.6	8.92
Q99LX0	Park7		Parkinson disease protein 7 homolog OS=Mus musculus OX=10090 GN=Park7 PE=1 SV=1	20	4	4	4	189	20	6.77
A6H619	Phrf1		PHD and RING finger domain-containing protein 1 OS=Mus musculus OX=10090 GN=Phrf1 PE=1 SV=2	0	1	1	1	1682	184	8.59
A2APB8	Tpx2		Targeting protein for Xklp2 OS=Mus musculus OX=10090 GN=Tpx2 PE=1 SV=1	5	5	5	5	745	85.8	9.38
Q5SUF2	Luc7l3		Luc7-like protein 3 OS=Mus musculus OX=10090 GN=Luc7l3 PE=1 SV=1	25	9	9	9	432	51.4	9.77
Q922Y1	Ubxn1		UBX domain-containing protein 1 OS=Mus musculus OX=10090 GN=Ubxn1 PE=1 SV=1	2	1	1	1	297	33.6	5.26
P61219	Polr2f		DNA-directed RNA polymerases I, II, and III subunit RPABC2 OS=Mus musculus OX=10090 GN=Polr2f PE=2 SV=1	6	1	1	1	127	14.5	4.22
P37889	Fbln2		Fibulin-2 OS=Mus musculus OX=10090 GN=Fbln2 PE=1 SV=2	9	9	9	9	1221	131.7	4.68
Q9CZR8	Tsfm		Elongation factor Ts, mitochondrial OS=Mus musculus OX=10090 GN=Tsfm PE=1 SV=1	7	1	1	1	324	35.3	7.06
Q9D898	Arpc5l		Actin-related protein 2/3 complex subunit 5-like protein OS=Mus musculus OX=10090 GN=Arpc5l PE=1 SV=1	8	1	1	1	153	17	6.8
P58044	Idi1		Isopentenyl-diphosphate Delta-isomerase 1 OS=Mus musculus OX=10090 GN=Idi1 PE=1 SV=1	29	5	5	5	227	26.3	6.16
Q8BXQ2	Pigt		GPI transamidase component PIG-T OS=Mus musculus OX=10090 GN=Pigt PE=1 SV=2	3	2	2	2	582	65.7	8.4
O88696	Clpp		ATP-dependent Clp protease proteolytic subunit, mitochondrial OS=Mus musculus OX=10090 GN=Clpp PE=1 SV=1	3	1	1	1	272	29.8	7.47
Q9JMK2	Csnk1e		Casein kinase I isoform epsilon OS=Mus musculus OX=10090 GN=Csnk1e PE=1 SV=2	3	1	1	1	416	47.3	9.66
P28474	Adh5		Alcohol dehydrogenase class-3 OS=Mus musculus OX=10090 GN=Adh5 PE=1 SV=3	4	1	1	1	374	39.5	7.25
Q8VE97	Srsf4		Serine/arginine-rich splicing factor 4 OS=Mus musculus OX=10090 GN=Srsf4 PE=2 SV=1	11	6	6	2	489	55.9	11.4
Q8BMJ3	Eif1ax		Eukaryotic translation initiation factor 1A, X-chromosomal OS=Mus musculus OX=10090 GN=Eif1ax PE=2 SV=3	12	2	2	1	144	16.5	5.24
Q91Z92	B3galt6		Beta-1,3-galactosyltransferase 6 OS=Mus musculus OX=10090 GN=B3galt6 PE=2 SV=1	4	1	1	1	325	37	8.82
P54071	Idh2		Isocitrate dehydrogenase [NADP], mitochondrial OS=Mus musculus OX=10090 GN=Idh2 PE=1 SV=3	32	14	16	13	452	50.9	8.69
P80315	Cct4		T-complex protein 1 subunit delta OS=Mus musculus OX=10090 GN=Cct4 PE=1 SV=3	36	17	22	16	539	58	8.02
Q921L3	Tmco1		Calcium load-activated calcium channel OS=Mus musculus OX=10090 GN=Tmco1 PE=1 SV=1	13	2	2	2	188	21.2	9.74
P50518	Atp6v1e1		V-type proton ATPase subunit E 1 OS=Mus musculus OX=10090 GN=Atp6v1e1 PE=1 SV=2	8	2	2	2	226	26.1	8.43
P52432	Polr1c		DNA-directed RNA polymerases I and III subunit RPAC1 OS=Mus musculus OX=10090 GN=Polr1c PE=1 SV=3	9	2	2	2	346	39.1	5.21
Q9Z247	Fkbp9		Peptidyl-prolyl cis-trans isomerase FKBP9 OS=Mus musculus OX=10090 GN=Fkbp9 PE=1 SV=1	10	5	5	5	570	63	5.21
Q8K2C9	Hacd3		Very-long-chain (3R)-3-hydroxyacyl-CoA dehydratase 3 OS=Mus musculus OX=10090 GN=Hacd3 PE=1 SV=2	3	1	1	1	362	43.1	9.13
Q9Z1Q5	Clic1		Chloride intracellular channel protein 1 OS=Mus musculus OX=10090 GN=Clic1 PE=1 SV=3	17	4	5	4	241	27	5.17
Q61398	Pcolce		Procollagen C-endopeptidase enhancer 1 OS=Mus musculus OX=10090 GN=Pcolce PE=1 SV=2	15	6	6	6	468	50.1	8.41
Q922P9	Glyr1		Cytokine-like nuclear factor N-PAC OS=Mus musculus OX=10090 GN=Glyr1 PE=1 SV=1	17	6	6	6	546	59.7	9.22
Q62465	Vat1		Synaptic vesicle membrane protein VAT-1 homolog OS=Mus musculus OX=10090 GN=Vat1 PE=1 SV=3	18	5	5	5	406	43.1	6.37
Q8VBV3	Exosc2		Exosome complex component RRP4 OS=Mus musculus OX=10090 GN=Exosc2 PE=1 SV=1	3	1	1	1	293	32.6	7.5
Q6ZPF4	Fmnl3		Formin-like protein 3 OS=Mus musculus OX=10090 GN=Fmnl3 PE=1 SV=2	1	1	1	1	1028	117.1	6.67
Q8VHK9	Dhx36		ATP-dependent DNA/RNA helicase DHX36 OS=Mus musculus OX=10090 GN=Dhx36 PE=1 SV=2	1	1	1	1	1001	113.8	8.29
Q6PAM1	Txlna		Alpha-taxilin OS=Mus musculus OX=10090 GN=Txlna PE=1 SV=1	22	10	10	10	554	62.3	6.74
P57759	Erp29		Endoplasmic reticulum resident protein 29 OS=Mus musculus OX=10090 GN=Erp29 PE=1 SV=2	5	1	1	1	262	28.8	6.15
Q8K4L0	Ddx54		ATP-dependent RNA helicase DDX54 OS=Mus musculus OX=10090 GN=Ddx54 PE=1 SV=1	1	1	1	1	874	97.7	10.01
Q9JHI5	Ivd		Isovaleryl-CoA dehydrogenase, mitochondrial OS=Mus musculus OX=10090 GN=Ivd PE=1 SV=1	8	3	3	3	424	46.3	8.29
Q9Z0P4	Palm		Paralemmin-1 OS=Mus musculus OX=10090 GN=Palm PE=1 SV=1	13	4	4	3	383	41.6	4.84
Q9JHR7	Ide		Insulin-degrading enzyme OS=Mus musculus OX=10090 GN=Ide PE=1 SV=1	1	1	1	1	1019	117.7	6.54
Q9CXW2	Mrps22		28S ribosomal protein S22, mitochondrial OS=Mus musculus OX=10090 GN=Mrps22 PE=1 SV=1	12	4	4	4	359	41.2	8.56
P35762	Cd81		CD81 antigen OS=Mus musculus OX=10090 GN=Cd81 PE=1 SV=2	22	3	3	3	236	25.8	5.83
Q8BWW4	Larp4		La-related protein 4 OS=Mus musculus OX=10090 GN=Larp4 PE=1 SV=2	6	4	5	4	719	79.7	6.39
Q924C1	Xpo5		Exportin-5 OS=Mus musculus OX=10090 GN=Xpo5 PE=1 SV=1	3	3	3	3	1204	136.9	5.82
P07744	Krt4		Keratin, type II cytoskeletal 4 OS=Mus musculus OX=10090 GN=Krt4 PE=1 SV=2	9	6	7	1	525	56.2	8.15
P50247	Ahcy		Adenosylhomocysteinase OS=Mus musculus OX=10090 GN=Ahcy PE=1 SV=3	20	8	8	8	432	47.7	6.54
P30416	Fkbp4		Peptidyl-prolyl cis-trans isomerase FKBP4 OS=Mus musculus OX=10090 GN=Fkbp4 PE=1 SV=5	26	10	11	10	458	51.5	5.72
Q9Z277	Baz1b		Tyrosine-protein kinase BAZ1B OS=Mus musculus OX=10090 GN=Baz1b PE=1 SV=2	1	1	1	1	1479	170.5	8.6
Q8BG15	Ctdspl2		CTD small phosphatase-like protein 2 OS=Mus musculus OX=10090 GN=Ctdspl2 PE=1 SV=1	2	1	1	1	465	52.8	6.25
Q62426	Cstb		Cystatin-B OS=Mus musculus OX=10090 GN=Cstb PE=1 SV=1	40	3	3	3	98	11	7.39
O55142	Rpl35a		60S ribosomal protein L35a OS=Mus musculus OX=10090 GN=Rpl35a PE=1 SV=2	45	6	6	6	110	12.5	10.89
Q60715	P4ha1		Prolyl 4-hydroxylase subunit alpha-1 OS=Mus musculus OX=10090 GN=P4ha1 PE=1 SV=2	31	14	19	14	534	60.9	5.9
P09055	Itgb1		Integrin beta-1 OS=Mus musculus OX=10090 GN=Itgb1 PE=1 SV=1	11	9	9	9	798	88.2	5.94
Q810B6	Ankfy1		Rabankyrin-5 OS=Mus musculus OX=10090 GN=Ankfy1 PE=1 SV=2	1	1	1	1	1169	128.6	5.91
Q8BYK6	Ythdf3		YTH domain-containing family protein 3 OS=Mus musculus OX=10090 GN=Ythdf3 PE=1 SV=2	7	4	4	4	585	63.9	9.04
Q9CR51	Atp6v1g1		V-type proton ATPase subunit G 1 OS=Mus musculus OX=10090 GN=Atp6v1g1 PE=1 SV=3	36	3	3	3	118	13.7	7.97
Q9JIH2	Nup50		Nuclear pore complex protein Nup50 OS=Mus musculus OX=10090 GN=Nup50 PE=1 SV=3	3	1	1	1	466	49.5	6.24
Q9D7S9	Chmp5		Charged multivesicular body protein 5 OS=Mus musculus OX=10090 GN=Chmp5 PE=1 SV=1	7	1	1	1	219	24.6	4.79
Q78XF5	Ostc		Oligosaccharyltransferase complex subunit OSTC OS=Mus musculus OX=10090 GN=Ostc PE=1 SV=1	8	1	1	1	149	16.8	9.13
Q91VW3	Sh3bgrl3		SH3 domain-binding glutamic acid-rich-like protein 3 OS=Mus musculus OX=10090 GN=Sh3bgrl3 PE=1 SV=1	9	1	1	1	93	10.5	5.14
Q9CQ75	Ndufa2		NADH dehydrogenase [ubiquinone] 1 alpha subcomplex subunit 2 OS=Mus musculus OX=10090 GN=Ndufa2 PE=1 SV=3	8	1	1	1	99	10.9	9.99
Q91W90	Txndc5		Thioredoxin domain-containing protein 5 OS=Mus musculus OX=10090 GN=Txndc5 PE=1 SV=2	29	8	9	8	417	46.4	5.78
Q9D823	Rpl37		60S ribosomal protein L37 OS=Mus musculus OX=10090 GN=Rpl37 PE=1 SV=3	7	1	1	1	97	11.1	11.74
Q9CYN9	Atp6ap2		Renin receptor OS=Mus musculus OX=10090 GN=Atp6ap2 PE=1 SV=2	4	1	1	1	350	39.1	5.54
Q3TWF6	Wdr70		WD repeat-containing protein 70 OS=Mus musculus OX=10090 GN=Wdr70 PE=1 SV=1	2	1	1	1	657	73.1	5.97
P68369	Tuba1a		Tubulin alpha-1A chain OS=Mus musculus OX=10090 GN=Tuba1a PE=1 SV=1	55	17	27	2	451	50.1	5.06
Q60722	Tcf4		Transcription factor 4 OS=Mus musculus OX=10090 GN=Tcf4 PE=1 SV=1	2	1	1	1	670	71.6	7.17
Q9WUD1	Stub1		E3 ubiquitin-protein ligase CHIP OS=Mus musculus OX=10090 GN=Stub1 PE=1 SV=1	7	2	2	2	304	34.9	6.01
Q9CR59	Gadd45gip1		Growth arrest and DNA damage-inducible proteins-interacting protein 1 OS=Mus musculus OX=10090 GN=Gadd45gip1 PE=1 SV=1	9	2	2	2	222	25.8	10.27
Q64448	Gja3		Gap junction alpha-3 protein OS=Mus musculus OX=10090 GN=Gja3 PE=2 SV=4	2	1	1	1	417	46.3	7.53
Q6ZWX6	Eif2s1		Eukaryotic translation initiation factor 2 subunit 1 OS=Mus musculus OX=10090 GN=Eif2s1 PE=1 SV=3	47	12	14	12	315	36.1	5.08
P09535	Igf2		Insulin-like growth factor II OS=Mus musculus OX=10090 GN=Igf2 PE=1 SV=1	13	2	2	2	180	20	9.16
Q9R0Y5	Ak1		Adenylate kinase isoenzyme 1 OS=Mus musculus OX=10090 GN=Ak1 PE=1 SV=1	9	2	2	2	194	21.5	5.81
Q9Z1B5	Mad2l1		Mitotic spindle assembly checkpoint protein MAD2A OS=Mus musculus OX=10090 GN=Mad2l1 PE=1 SV=2	5	1	1	1	205	23.6	5.2
Q9DAW9	Cnn3		Calponin-3 OS=Mus musculus OX=10090 GN=Cnn3 PE=1 SV=1	22	6	6	5	330	36.4	5.72
Q9DC51	Gnai3		Guanine nucleotide-binding protein G(i) subunit alpha-3 OS=Mus musculus OX=10090 GN=Gnai3 PE=1 SV=3	17	5	6	2	354	40.5	5.69
Q9CPV4	Glod4		Glyoxalase domain-containing protein 4 OS=Mus musculus OX=10090 GN=Glod4 PE=1 SV=1	6	1	1	1	298	33.3	5.47
Q9CPW4	Arpc5		Actin-related protein 2/3 complex subunit 5 OS=Mus musculus OX=10090 GN=Arpc5 PE=1 SV=3	21	3	3	3	151	16.3	5.67
Q62418	Dbnl		Drebrin-like protein OS=Mus musculus OX=10090 GN=Dbnl PE=1 SV=2	13	4	4	4	436	48.7	4.92
O08547	Sec22b		Vesicle-trafficking protein SEC22b OS=Mus musculus OX=10090 GN=Sec22b PE=1 SV=3	33	6	6	6	215	24.7	8.51
Q6PGB6	Naa50		N-alpha-acetyltransferase 50 OS=Mus musculus OX=10090 GN=Naa50 PE=1 SV=1	25	4	4	4	169	19.4	8.81
P11499	Hsp90ab1		Heat shock protein HSP 90-beta OS=Mus musculus OX=10090 GN=Hsp90ab1 PE=1 SV=3	50	36	52	23	724	83.2	5.03
Q8BGH2	Samm50		Sorting and assembly machinery component 50 homolog OS=Mus musculus OX=10090 GN=Samm50 PE=1 SV=1	20	7	8	7	469	51.8	6.8
P52825	Cpt2		Carnitine O-palmitoyltransferase 2, mitochondrial OS=Mus musculus OX=10090 GN=Cpt2 PE=1 SV=2	2	1	1	1	658	73.9	8.37
Q9D2G2	Dlst		Dihydrolipoyllysine-residue succinyltransferase component of 2-oxoglutarate dehydrogenase complex, mitochondrial OS=Mus musculus OX=10090 GN=Dlst PE=1 SV=1	20	7	7	7	454	49	8.95
Q9D0F6	Rfc5		Replication factor C subunit 5 OS=Mus musculus OX=10090 GN=Rfc5 PE=1 SV=1	3	1	1	1	339	38.1	7.81
O70435	Psma3		Proteasome subunit alpha type-3 OS=Mus musculus OX=10090 GN=Psma3 PE=1 SV=3	26	7	9	7	255	28.4	5.44
Q8BGA9	Oxa1l		Mitochondrial inner membrane protein OXA1L OS=Mus musculus OX=10090 GN=Oxa1l PE=1 SV=1	2	1	1	1	433	48.2	9.61
P57780	Actn4		Alpha-actinin-4 OS=Mus musculus OX=10090 GN=Actn4 PE=1 SV=1	53	40	56	25	912	104.9	5.41
Q64213	Sf1		Splicing factor 1 OS=Mus musculus OX=10090 GN=Sf1 PE=1 SV=6	13	6	8	6	653	70.4	8.98
Q64511	Top2b		DNA topoisomerase 2-beta OS=Mus musculus OX=10090 GN=Top2b PE=1 SV=2	6	11	11	1	1612	181.8	8.29
P35601	Rfc1		Replication factor C subunit 1 OS=Mus musculus OX=10090 GN=Rfc1 PE=1 SV=2	4	4	4	4	1131	125.9	9.33
Q02248	Ctnnb1		Catenin beta-1 OS=Mus musculus OX=10090 GN=Ctnnb1 PE=1 SV=1	6	4	4	1	781	85.4	5.86
Q3TWW8	Srsf6		Serine/arginine-rich splicing factor 6 OS=Mus musculus OX=10090 GN=Srsf6 PE=1 SV=1	12	5	5	1	339	39	11.46
Q99L13	Hibadh		3-hydroxyisobutyrate dehydrogenase, mitochondrial OS=Mus musculus OX=10090 GN=Hibadh PE=1 SV=1	5	1	1	1	335	35.4	8.13
Q9EQI8	Mrpl46		39S ribosomal protein L46, mitochondrial OS=Mus musculus OX=10090 GN=Mrpl46 PE=1 SV=1	5	1	1	1	283	32.1	7.4
Q810H5	Galp		Galanin-like peptide OS=Mus musculus OX=10090 GN=Galp PE=2 SV=1	9	1	1	1	117	12.8	6.93
Q6PB93	Galnt2		Polypeptide N-acetylgalactosaminyltransferase 2 OS=Mus musculus OX=10090 GN=Galnt2 PE=1 SV=1	5	3	3	3	570	64.5	8.53
Q9Z130	Hnrnpdl		Heterogeneous nuclear ribonucleoprotein D-like OS=Mus musculus OX=10090 GN=Hnrnpdl PE=1 SV=1	23	5	6	3	301	33.5	7.31
P60766	Cdc42		Cell division control protein 42 homolog OS=Mus musculus OX=10090 GN=Cdc42 PE=1 SV=2	42	7	8	6	191	21.2	6.55
P97329	Kif20a		Kinesin-like protein KIF20A OS=Mus musculus OX=10090 GN=Kif20a PE=1 SV=1	1	1	1	1	887	99.8	6.99
P56383	Atp5mc2		ATP synthase F(0) complex subunit C2, mitochondrial OS=Mus musculus OX=10090 GN=Atp5mc2 PE=1 SV=2	5	1	1	1	146	15.5	10.35
O70305	Atxn2		Ataxin-2 OS=Mus musculus OX=10090 GN=Atxn2 PE=1 SV=1	3	3	3	3	1285	136.4	9.55
Q8C9B9	Dido1		Death-inducer obliterator 1 OS=Mus musculus OX=10090 GN=Dido1 PE=1 SV=4	4	7	7	7	2256	247	7.91
Q9CZW5	Tomm70		Mitochondrial import receptor subunit TOM70 OS=Mus musculus OX=10090 GN=Tomm70 PE=1 SV=2	17	9	9	9	611	67.5	7.53
Q9Z2I9	Sucla2		Succinate--CoA ligase [ADP-forming] subunit beta, mitochondrial OS=Mus musculus OX=10090 GN=Sucla2 PE=1 SV=2	8	4	4	4	463	50.1	7.01
P61924	Copz1		Coatomer subunit zeta-1 OS=Mus musculus OX=10090 GN=Copz1 PE=1 SV=1	6	1	1	1	177	20.2	4.81
P26638	Sars1		Serine--tRNA ligase, cytoplasmic OS=Mus musculus OX=10090 GN=Sars1 PE=1 SV=3	15	7	7	7	512	58.4	6.3
P56960	Exosc10		Exosome component 10 OS=Mus musculus OX=10090 GN=Exosc10 PE=1 SV=2	1	1	1	1	887	100.9	8.29
Q9D0T1	Snu13		NHP2-like protein 1 OS=Mus musculus OX=10090 GN=Snu13 PE=1 SV=4	41	6	7	6	128	14.2	8.46
P28659	Celf1		CUGBP Elav-like family member 1 OS=Mus musculus OX=10090 GN=Celf1 PE=1 SV=2	10	4	4	4	486	52.1	8.46
Q00612	G6pdx		Glucose-6-phosphate 1-dehydrogenase X OS=Mus musculus OX=10090 GN=G6pdx PE=1 SV=3	3	2	2	2	515	59.2	6.49
Q9ERQ3	Znf704		Zinc finger protein 704 OS=Mus musculus OX=10090 GN=Znf704 PE=1 SV=1	1	1	1	1	566	61.1	7.24
Q9QUM9	Psma6		Proteasome subunit alpha type-6 OS=Mus musculus OX=10090 GN=Psma6 PE=1 SV=1	26	6	6	6	246	27.4	6.76
Q9JJI8	Rpl38		60S ribosomal protein L38 OS=Mus musculus OX=10090 GN=Rpl38 PE=1 SV=3	50	6	11	6	70	8.2	10.1
P15306	Thbd		Thrombomodulin OS=Mus musculus OX=10090 GN=Thbd PE=1 SV=1	1	1	1	1	577	61.8	4.6
O88939	Zbtb7a		Zinc finger and BTB domain-containing protein 7A OS=Mus musculus OX=10090 GN=Zbtb7a PE=1 SV=2	1	1	1	1	569	60.2	5.12
Q8BFR5	Tufm		Elongation factor Tu, mitochondrial OS=Mus musculus OX=10090 GN=Tufm PE=1 SV=1	26	10	11	10	452	49.5	7.56
P80314	Cct2		T-complex protein 1 subunit beta OS=Mus musculus OX=10090 GN=Cct2 PE=1 SV=4	54	21	27	21	535	57.4	6.4
Q91YT0	Ndufv1		NADH dehydrogenase [ubiquinone] flavoprotein 1, mitochondrial OS=Mus musculus OX=10090 GN=Ndufv1 PE=1 SV=1	2	1	1	1	464	50.8	8.21
Q0VBL3	Rbm15		RNA-binding protein 15 OS=Mus musculus OX=10090 GN=Rbm15 PE=1 SV=1	5	4	4	4	962	105.7	10.08
P70257	Nfix		Nuclear factor 1 X-type OS=Mus musculus OX=10090 GN=Nfix PE=1 SV=2	4	2	2	1	488	53.4	8.68
Q99JF5	Mvd		Diphosphomevalonate decarboxylase OS=Mus musculus OX=10090 GN=Mvd PE=1 SV=2	2	1	1	1	401	44	6.3
Q6ZPZ3	Zc3h4		Zinc finger CCCH domain-containing protein 4 OS=Mus musculus OX=10090 GN=Zc3h4 PE=1 SV=2	1	1	1	1	1304	140.9	6.27
Q6PFR5	Tra2a		Transformer-2 protein homolog alpha OS=Mus musculus OX=10090 GN=Tra2a PE=1 SV=1	9	2	2	2	281	32.3	11.28
Q920Q4	Vps16		Vacuolar protein sorting-associated protein 16 homolog OS=Mus musculus OX=10090 GN=Vps16 PE=1 SV=3	1	1	1	1	839	94.9	7.01
Q8C5R2	Proser2		Proline and serine-rich protein 2 OS=Mus musculus OX=10090 GN=Proser2 PE=1 SV=3	4	1	1	1	471	50.4	6.3
P02088	Hbb-b1		Hemoglobin subunit beta-1 OS=Mus musculus OX=10090 GN=Hbb-b1 PE=1 SV=2	6	1	1	1	147	15.8	7.65
P62862	Fau		40S ribosomal protein S30 OS=Mus musculus OX=10090 GN=Fau PE=1 SV=1	32	2	5	2	59	6.6	12.15
Q8VEA4	Chchd4		Mitochondrial intermembrane space import and assembly protein 40 OS=Mus musculus OX=10090 GN=Chchd4 PE=1 SV=1	6	1	1	1	139	15.5	4.32
Q922M3	Kctd10		BTB/POZ domain-containing adapter for CUL3-mediated RhoA degradation protein 3 OS=Mus musculus OX=10090 GN=Kctd10 PE=1 SV=1	5	1	1	1	315	35.7	6.34
P54728	Rad23b		UV excision repair protein RAD23 homolog B OS=Mus musculus OX=10090 GN=Rad23b PE=1 SV=2	9	3	5	3	416	43.5	4.83
P12815	Pdcd6		Programmed cell death protein 6 OS=Mus musculus OX=10090 GN=Pdcd6 PE=1 SV=2	10	2	2	2	191	21.9	5.4
Q99LH1	Gnl2		Nucleolar GTP-binding protein 2 OS=Mus musculus OX=10090 GN=Gnl2 PE=1 SV=2	2	2	2	2	728	83.3	9.2
Q91W50	Csde1		Cold shock domain-containing protein E1 OS=Mus musculus OX=10090 GN=Csde1 PE=1 SV=1	10	6	6	6	798	88.7	6.37
P58871	Tnks1bp1		182 kDa tankyrase-1-binding protein OS=Mus musculus OX=10090 GN=Tnks1bp1 PE=1 SV=2	2	2	2	2	1720	181.7	4.88
P16546	Sptan1		Spectrin alpha chain, non-erythrocytic 1 OS=Mus musculus OX=10090 GN=Sptan1 PE=1 SV=4	29	54	58	54	2472	284.4	5.33
Q91YM4	Tbrg4		FAST kinase domain-containing protein 4 OS=Mus musculus OX=10090 GN=Tbrg4 PE=1 SV=1	3	1	1	1	630	71.5	8.34
Q501J6	Ddx17		Probable ATP-dependent RNA helicase DDX17 OS=Mus musculus OX=10090 GN=Ddx17 PE=1 SV=1	36	21	25	13	650	72.4	8.59
Q9DB34	Chmp2a		Charged multivesicular body protein 2a OS=Mus musculus OX=10090 GN=Chmp2a PE=1 SV=1	3	1	1	1	222	25.1	5.97
Q9EPU4	Cpsf1		Cleavage and polyadenylation specificity factor subunit 1 OS=Mus musculus OX=10090 GN=Cpsf1 PE=1 SV=1	5	6	6	6	1441	160.7	6.39
Q9D0R8	Lsm12		Protein LSM12 OS=Mus musculus OX=10090 GN=Lsm12 PE=1 SV=1	18	3	3	3	195	21.7	7.74
G5E870	Trip12		E3 ubiquitin-protein ligase TRIP12 OS=Mus musculus OX=10090 GN=Trip12 PE=1 SV=1	2	3	3	3	2025	224	8.35
P86044	Ano9		Anoctamin-9 OS=Mus musculus OX=10090 GN=Ano9 PE=1 SV=1	1	1	1	1	747	87.1	7.44
A2AMM0	Cavin4		Caveolae-associated protein 4 OS=Mus musculus OX=10090 GN=Cavin4 PE=1 SV=1	4	1	1	1	362	41	8.65
P62962	Pfn1		Profilin-1 OS=Mus musculus OX=10090 GN=Pfn1 PE=1 SV=2	61	7	11	7	140	14.9	8.28
P70372	Elavl1		ELAV-like protein 1 OS=Mus musculus OX=10090 GN=Elavl1 PE=1 SV=2	33	9	11	9	326	36.1	9.04
Q3UZ39	Lrrfip1		Leucine-rich repeat flightless-interacting protein 1 OS=Mus musculus OX=10090 GN=Lrrfip1 PE=1 SV=2	3	2	2	2	729	79.2	4.82
Q91W59	Rbms1		RNA-binding motif, single-stranded-interacting protein 1 OS=Mus musculus OX=10090 GN=Rbms1 PE=1 SV=1	7	2	2	2	403	44	8.66
Q8BUV8	Gpr107		Protein GPR107 OS=Mus musculus OX=10090 GN=Gpr107 PE=1 SV=2	2	1	1	1	551	62	7.59
Q8VI56	Lrp4		Low-density lipoprotein receptor-related protein 4 OS=Mus musculus OX=10090 GN=Lrp4 PE=1 SV=3	2	1	1	1	1905	211.8	5.39
O08856	Ell		RNA polymerase II elongation factor ELL OS=Mus musculus OX=10090 GN=Ell PE=2 SV=2	2	1	1	1	602	67.1	9.19
Q08509	Eps8		Epidermal growth factor receptor kinase substrate 8 OS=Mus musculus OX=10090 GN=Eps8 PE=1 SV=2	14	8	8	8	821	91.7	7.65
O55222	Ilk		Integrin-linked protein kinase OS=Mus musculus OX=10090 GN=Ilk PE=1 SV=2	15	7	7	7	452	51.3	8.07
Q68FL6	Mars1		Methionine--tRNA ligase, cytoplasmic OS=Mus musculus OX=10090 GN=Mars1 PE=1 SV=1	2	2	2	2	902	101.4	7.14
Q60596	Xrcc1		DNA repair protein XRCC1 OS=Mus musculus OX=10090 GN=Xrcc1 PE=1 SV=2	3	2	2	2	631	68.9	6.33
Q9CZU3	Mtrex		Exosome RNA helicase MTR4 OS=Mus musculus OX=10090 GN=Mtrex PE=1 SV=1	15	13	13	13	1040	117.6	6.4
P54822	Adsl		Adenylosuccinate lyase OS=Mus musculus OX=10090 GN=Adsl PE=1 SV=2	2	1	1	1	484	54.8	7.27
Q6P9R2	Oxsr1		Serine/threonine-protein kinase OSR1 OS=Mus musculus OX=10090 GN=Oxsr1 PE=1 SV=1	3	1	1	1	527	58.2	6.43
P70255	Nfic		Nuclear factor 1 C-type OS=Mus musculus OX=10090 GN=Nfic PE=1 SV=1	10	4	4	3	439	48.7	8.32
P51150	Rab7a		Ras-related protein Rab-7a OS=Mus musculus OX=10090 GN=Rab7a PE=1 SV=2	37	7	7	7	207	23.5	6.7
P62082	Rps7		40S ribosomal protein S7 OS=Mus musculus OX=10090 GN=Rps7 PE=1 SV=1	44	8	8	8	194	22.1	10.1
P11438	Lamp1		Lysosome-associated membrane glycoprotein 1 OS=Mus musculus OX=10090 GN=Lamp1 PE=1 SV=2	5	2	2	2	406	43.8	8.4
P58321	Uchl4		Ubiquitin carboxyl-terminal hydrolase isozyme L4 OS=Mus musculus OX=10090 GN=Uchl4 PE=2 SV=1	6	1	1	1	233	26.4	5.1
Q99KV1	Dnajb11		DnaJ homolog subfamily B member 11 OS=Mus musculus OX=10090 GN=Dnajb11 PE=1 SV=1	16	6	6	6	358	40.5	6.32
P23198	Cbx3		Chromobox protein homolog 3 OS=Mus musculus OX=10090 GN=Cbx3 PE=1 SV=2	28	5	6	5	183	20.8	5.22
P48722	Hspa4l		Heat shock 70 kDa protein 4L OS=Mus musculus OX=10090 GN=Hspa4l PE=1 SV=2	3	2	2	1	838	94.3	5.74
P63276	Rps17		40S ribosomal protein S17 OS=Mus musculus OX=10090 GN=Rps17 PE=1 SV=2	61	7	9	7	135	15.5	9.85
Q5I012	Slc38a10		Putative sodium-coupled neutral amino acid transporter 10 OS=Mus musculus OX=10090 GN=Slc38a10 PE=1 SV=2	1	1	1	1	1090	117.1	5.96
Q3UFS0	Zyg11b		Protein zyg-11 homolog B OS=Mus musculus OX=10090 GN=Zyg11b PE=1 SV=2	1	1	1	1	744	83.9	6.87
Q8K2A1	Gulp1		PTB domain-containing engulfment adapter protein 1 OS=Mus musculus OX=10090 GN=Gulp1 PE=1 SV=1	7	2	2	2	304	34.4	7.9
P70336	Rock2		Rho-associated protein kinase 2 OS=Mus musculus OX=10090 GN=Rock2 PE=1 SV=1	2	2	2	2	1388	160.5	5.99
Q920A5	Scpep1		Retinoid-inducible serine carboxypeptidase OS=Mus musculus OX=10090 GN=Scpep1 PE=1 SV=2	7	3	3	3	452	50.9	5.66
P0C0A3	Chmp6		Charged multivesicular body protein 6 OS=Mus musculus OX=10090 GN=Chmp6 PE=1 SV=2	7	1	1	1	200	23.4	5.44
O35638	Stag2		Cohesin subunit SA-2 OS=Mus musculus OX=10090 GN=Stag2 PE=1 SV=3	3	4	4	4	1231	141.2	5.43
Q6A068	Cdc5l		Cell division cycle 5-like protein OS=Mus musculus OX=10090 GN=Cdc5l PE=1 SV=2	23	15	16	15	802	92.1	8.02
Q99KI3	Emc3		ER membrane protein complex subunit 3 OS=Mus musculus OX=10090 GN=Emc3 PE=1 SV=3	3	1	1	1	261	30	6.81
Q8K4B0	Mta1		Metastasis-associated protein MTA1 OS=Mus musculus OX=10090 GN=Mta1 PE=1 SV=1	3	2	2	2	715	80.7	9.29
Q99M87	Dnaja3		DnaJ homolog subfamily A member 3, mitochondrial OS=Mus musculus OX=10090 GN=Dnaja3 PE=1 SV=1	14	4	4	4	480	52.4	9.22
Q5SXY1	Specc1		Cytospin-B OS=Mus musculus OX=10090 GN=Specc1 PE=1 SV=2	10	9	9	9	1067	118	6.64
Q9JL35	Hmgn5		High mobility group nucleosome-binding domain-containing protein 5 OS=Mus musculus OX=10090 GN=Hmgn5 PE=1 SV=2	2	1	1	1	406	45.3	4.37
P58021	Tm9sf2		Transmembrane 9 superfamily member 2 OS=Mus musculus OX=10090 GN=Tm9sf2 PE=1 SV=1	3	2	2	2	662	75.3	7.43
P16045	Lgals1		Galectin-1 OS=Mus musculus OX=10090 GN=Lgals1 PE=1 SV=3	67	8	28	8	135	14.9	5.49
C0HKD8	Mfap1a		Microfibrillar-associated protein 1A OS=Mus musculus OX=10090 GN=Mfap1a PE=1 SV=1	6	2	2	2	439	51.9	4.98
Q99KE1	Me2		NAD-dependent malic enzyme, mitochondrial OS=Mus musculus OX=10090 GN=Me2 PE=1 SV=1	2	1	1	1	589	65.8	7.61
Q80V86	Ints8		Integrator complex subunit 8 OS=Mus musculus OX=10090 GN=Ints8 PE=1 SV=1	1	1	1	1	995	113.3	6.96
Q8K298	Anln		Anillin OS=Mus musculus OX=10090 GN=Anln PE=1 SV=2	6	5	5	5	1121	122.7	6.98
Q60848	Hells		Lymphocyte-specific helicase OS=Mus musculus OX=10090 GN=Hells PE=1 SV=2	7	6	6	6	821	95.1	8
Q9CYZ2	Tpd52l2		Tumor protein D54 OS=Mus musculus OX=10090 GN=Tpd52l2 PE=1 SV=1	22	4	4	4	220	24	6.15
Q60710	Samhd1		Deoxynucleoside triphosphate triphosphohydrolase SAMHD1 OS=Mus musculus OX=10090 GN=Samhd1 PE=1 SV=3	2	1	1	1	658	75.8	7.93
A2BH40	Arid1a		AT-rich interactive domain-containing protein 1A OS=Mus musculus OX=10090 GN=Arid1a PE=1 SV=1	1	2	2	1	2283	241.9	6.68
Q6PD26	Pigs		GPI transamidase component PIG-S OS=Mus musculus OX=10090 GN=Pigs PE=1 SV=3	4	2	2	2	555	61.7	6.93
Q60760	Grb10		Growth factor receptor-bound protein 10 OS=Mus musculus OX=10090 GN=Grb10 PE=1 SV=2	2	1	1	1	621	70.5	9.07
O35658	C1qbp		Complement component 1 Q subcomponent-binding protein, mitochondrial OS=Mus musculus OX=10090 GN=C1qbp PE=1 SV=1	14	3	3	3	278	31	4.92
P62897	Cycs		Cytochrome c, somatic OS=Mus musculus OX=10090 GN=Cycs PE=1 SV=2	62	7	9	7	105	11.6	9.58
Q8BP47	NARS1		Asparagine--tRNA ligase, cytoplasmic OS=Mus musculus OX=10090 GN=NARS1 PE=1 SV=2	20	9	9	9	559	64.2	5.86
Q9WV70	Noc2l		Nucleolar complex protein 2 homolog OS=Mus musculus OX=10090 GN=Noc2l PE=1 SV=2	7	5	5	5	747	85.4	5.97
Q9D6N5	Drap1		Dr1-associated corepressor OS=Mus musculus OX=10090 GN=Drap1 PE=1 SV=3	9	2	2	2	205	22.3	5.26
Q9JJ89	Ccdc86		Coiled-coil domain-containing protein 86 OS=Mus musculus OX=10090 GN=Ccdc86 PE=1 SV=2	3	1	1	1	426	46.5	9.64
P08207	S100a10		Protein S100-A10 OS=Mus musculus OX=10090 GN=S100a10 PE=1 SV=2	45	5	8	5	97	11.2	6.77
Q8CG47	Smc4		Structural maintenance of chromosomes protein 4 OS=Mus musculus OX=10090 GN=Smc4 PE=1 SV=1	3	5	5	5	1286	146.8	7.3
Q9ES97	Rtn3		Reticulon-3 OS=Mus musculus OX=10090 GN=Rtn3 PE=1 SV=2	3	3	3	3	964	103.8	4.92
P17710	Hk1		Hexokinase-1 OS=Mus musculus OX=10090 GN=Hk1 PE=1 SV=3	7	7	7	5	974	108.2	6.8
Q9CZB0	Sdhc		Succinate dehydrogenase cytochrome b560 subunit, mitochondrial OS=Mus musculus OX=10090 GN=Sdhc PE=1 SV=1	5	1	1	1	169	18.4	9.94
Q02788	Col6a2		Collagen alpha-2(VI) chain OS=Mus musculus OX=10090 GN=Col6a2 PE=1 SV=3	3	3	3	3	1034	110.3	6.42
Q99LL5	Pwp1		Periodic tryptophan protein 1 homolog OS=Mus musculus OX=10090 GN=Pwp1 PE=1 SV=1	5	2	2	2	501	55.6	4.82
O54879	Hmgb3		High mobility group protein B3 OS=Mus musculus OX=10090 GN=Hmgb3 PE=1 SV=3	14	2	2	2	200	23	8.37
Q61081	Cdc37		Hsp90 co-chaperone Cdc37 OS=Mus musculus OX=10090 GN=Cdc37 PE=1 SV=1	17	5	5	5	379	44.6	5.34
Q9DBY8	Nvl		Nuclear valosin-containing protein-like OS=Mus musculus OX=10090 GN=Nvl PE=1 SV=1	2	1	1	1	855	94.4	6.35
Q9D855	Uqcrb		Cytochrome b-c1 complex subunit 7 OS=Mus musculus OX=10090 GN=Uqcrb PE=1 SV=3	22	2	2	2	111	13.5	9.11
P63044	Vamp2		Vesicle-associated membrane protein 2 OS=Mus musculus OX=10090 GN=Vamp2 PE=1 SV=2	21	2	2	2	116	12.7	8.13
Q9D2E2	Toe1		Target of EGR1 protein 1 OS=Mus musculus OX=10090 GN=Toe1 PE=1 SV=1	3	1	1	1	511	56.8	6.64
Q8BG67	Efr3a		Protein EFR3 homolog A OS=Mus musculus OX=10090 GN=Efr3a PE=1 SV=1	1	1	1	1	819	92.6	6.83
Q921T2	Tor1aip1		Torsin-1A-interacting protein 1 OS=Mus musculus OX=10090 GN=Tor1aip1 PE=1 SV=3	3	1	1	1	595	66.7	7.05
O54734	Ddost		Dolichyl-diphosphooligosaccharide--protein glycosyltransferase 48 kDa subunit OS=Mus musculus OX=10090 GN=Ddost PE=1 SV=2	39	12	13	12	441	49	5.83
P60335	Pcbp1		Poly(rC)-binding protein 1 OS=Mus musculus OX=10090 GN=Pcbp1 PE=1 SV=1	43	12	14	7	356	37.5	7.09
P61222	Abce1		ATP-binding cassette sub-family E member 1 OS=Mus musculus OX=10090 GN=Abce1 PE=1 SV=1	20	10	10	10	599	67.3	8.34
Q9JHS9	Cwc15		Spliceosome-associated protein CWC15 homolog OS=Mus musculus OX=10090 GN=Cwc15 PE=1 SV=1	8	2	2	2	229	26.6	5.71
Q99MN1	Kars1		Lysine--tRNA ligase OS=Mus musculus OX=10090 GN=Kars1 PE=1 SV=1	12	6	6	6	595	67.8	5.94
Q9JLJ2	Aldh9a1		4-trimethylaminobutyraldehyde dehydrogenase OS=Mus musculus OX=10090 GN=Aldh9a1 PE=1 SV=1	2	1	1	1	494	53.5	6.98
Q91WS0	Cisd1		CDGSH iron-sulfur domain-containing protein 1 OS=Mus musculus OX=10090 GN=Cisd1 PE=1 SV=1	20	2	3	2	108	12.1	9.06
Q6PDG5	Smarcc2		SWI/SNF complex subunit SMARCC2 OS=Mus musculus OX=10090 GN=Smarcc2 PE=1 SV=2	11	12	13	7	1213	132.5	5.59
Q8BMJ2	Lars1		Leucine--tRNA ligase, cytoplasmic OS=Mus musculus OX=10090 GN=Lars1 PE=1 SV=2	15	15	15	15	1178	134.1	7.05
Q9CWK8	Snx2		Sorting nexin-2 OS=Mus musculus OX=10090 GN=Snx2 PE=1 SV=2	2	1	1	1	519	58.4	5.12
Q6ZQ03	Fnbp4		Formin-binding protein 4 OS=Mus musculus OX=10090 GN=Fnbp4 PE=1 SV=2	1	1	1	1	1031	111.2	4.73
Q9CQ60	Pgls		6-phosphogluconolactonase OS=Mus musculus OX=10090 GN=Pgls PE=1 SV=1	33	5	5	5	257	27.2	5.85
Q9CQJ4	Rnf2		E3 ubiquitin-protein ligase RING2 OS=Mus musculus OX=10090 GN=Rnf2 PE=1 SV=1	10	3	3	3	336	37.6	6.84
Q9QWF0	Chaf1a		Chromatin assembly factor 1 subunit A OS=Mus musculus OX=10090 GN=Chaf1a PE=1 SV=1	4	4	4	4	911	101.9	5.4
Q8C1A5	Thop1		Thimet oligopeptidase OS=Mus musculus OX=10090 GN=Thop1 PE=1 SV=1	3	2	2	2	687	78	6.06
Q923D5	Wbp11		WW domain-binding protein 11 OS=Mus musculus OX=10090 GN=Wbp11 PE=1 SV=2	6	3	3	3	641	69.8	8.4
Q7TSH6	Scaf4		SR-related and CTD-associated factor 4 OS=Mus musculus OX=10090 GN=Scaf4 PE=1 SV=1	1	1	1	1	1183	129	9.64
P08730	Krt13		Keratin, type I cytoskeletal 13 OS=Mus musculus OX=10090 GN=Krt13 PE=1 SV=2	11	7	11	1	437	47.7	4.86
P63280	Ube2i		SUMO-conjugating enzyme UBC9 OS=Mus musculus OX=10090 GN=Ube2i PE=1 SV=1	15	3	3	3	158	18	8.66
P61982	Ywhag		14-3-3 protein gamma OS=Mus musculus OX=10090 GN=Ywhag PE=1 SV=2	47	9	12	7	247	28.3	4.89
Q9D379	Ephx1		Epoxide hydrolase 1 OS=Mus musculus OX=10090 GN=Ephx1 PE=1 SV=2	27	11	11	11	455	52.5	8.35
Q9WV55	Vapa		Vesicle-associated membrane protein-associated protein A OS=Mus musculus OX=10090 GN=Vapa PE=1 SV=2	28	7	8	7	249	27.8	8.4
P51863	Atp6v0d1		V-type proton ATPase subunit d 1 OS=Mus musculus OX=10090 GN=Atp6v0d1 PE=1 SV=2	9	3	3	3	351	40.3	5
Q9CXY6	Ilf2		Interleukin enhancer-binding factor 2 OS=Mus musculus OX=10090 GN=Ilf2 PE=1 SV=1	36	10	12	10	390	43	5.26
Q8C7E9	Cstf2t		Cleavage stimulation factor subunit 2 tau variant OS=Mus musculus OX=10090 GN=Cstf2t PE=1 SV=2	13	6	7	6	632	65.8	7.25
P24472	Gsta4		Glutathione S-transferase A4 OS=Mus musculus OX=10090 GN=Gsta4 PE=1 SV=3	3	1	1	1	222	25.5	7.39
Q3ULW8	Parp3		Protein mono-ADP-ribosyltransferase PARP3 OS=Mus musculus OX=10090 GN=Parp3 PE=2 SV=1	2	1	1	1	533	59.9	7.12
Q8BZX4	Srek1		Splicing regulatory glutamine/lysine-rich protein 1 OS=Mus musculus OX=10090 GN=Srek1 PE=2 SV=1	5	2	2	2	494	56.7	10.48
O55125	Nipsnap1		Protein NipSnap homolog 1 OS=Mus musculus OX=10090 GN=Nipsnap1 PE=1 SV=1	8	2	2	2	284	33.3	9.44
P84096	Rhog		Rho-related GTP-binding protein RhoG OS=Mus musculus OX=10090 GN=Rhog PE=1 SV=1	13	2	2	1	191	21.3	8.12
Q9CWL8	Ctnnbl1		Beta-catenin-like protein 1 OS=Mus musculus OX=10090 GN=Ctnnbl1 PE=1 SV=1	5	4	4	4	563	64.9	5.07
Q8VD75	Hip1		Huntingtin-interacting protein 1 OS=Mus musculus OX=10090 GN=Hip1 PE=1 SV=2	10	9	9	9	1029	115.1	5.43
Q921Q7	Rin1		Ras and Rab interactor 1 OS=Mus musculus OX=10090 GN=Rin1 PE=1 SV=1	1	1	1	1	763	83	8.72
E9Q6J5	Bod1l		Biorientation of chromosomes in cell division protein 1-like 1 OS=Mus musculus OX=10090 GN=Bod1l PE=1 SV=1	2	6	6	6	3032	327.3	5.33
P61804	Dad1		Dolichyl-diphosphooligosaccharide--protein glycosyltransferase subunit DAD1 OS=Mus musculus OX=10090 GN=Dad1 PE=1 SV=3	19	2	2	2	113	12.5	7.08
Q91YN9	Bag2		BAG family molecular chaperone regulator 2 OS=Mus musculus OX=10090 GN=Bag2 PE=1 SV=1	16	3	3	3	210	23.5	6.42
D3YXK1	Samd1		Sterile alpha motif domain-containing protein 1 OS=Mus musculus OX=10090 GN=Samd1 PE=1 SV=1	4	2	2	2	519	54.5	7.47
P59108	Cpne2		Copine-2 OS=Mus musculus OX=10090 GN=Cpne2 PE=1 SV=1	5	3	3	2	548	61	5.96
P47740	Aldh3a2		Aldehyde dehydrogenase family 3 member A2 OS=Mus musculus OX=10090 GN=Aldh3a2 PE=1 SV=2	3	1	1	1	484	53.9	8.35
Q91VH6	Memo1		Protein MEMO1 OS=Mus musculus OX=10090 GN=Memo1 PE=1 SV=1	7	2	2	2	297	33.7	7.14
P40142	Tkt		Transketolase OS=Mus musculus OX=10090 GN=Tkt PE=1 SV=1	34	16	18	16	623	67.6	7.5
Q9WU78	Pdcd6ip		Programmed cell death 6-interacting protein OS=Mus musculus OX=10090 GN=Pdcd6ip PE=1 SV=3	10	8	8	8	869	96	6.52
O35326	Srsf5		Serine/arginine-rich splicing factor 5 OS=Mus musculus OX=10090 GN=Srsf5 PE=1 SV=2	13	4	4	3	269	30.9	11.56
P47226	Tes		Testin OS=Mus musculus OX=10090 GN=Tes PE=1 SV=1	5	2	2	2	423	48	8.31
P62267	Rps23		40S ribosomal protein S23 OS=Mus musculus OX=10090 GN=Rps23 PE=1 SV=3	30	6	6	6	143	15.8	10.49
P42208	Septin2		Septin-2 OS=Mus musculus OX=10090 GN=Septin2 PE=1 SV=2	23	7	8	7	361	41.5	6.55
P63085	Mapk1		Mitogen-activated protein kinase 1 OS=Mus musculus OX=10090 GN=Mapk1 PE=1 SV=3	8	3	4	3	358	41.2	6.98
Q91YP2	Nln		Neurolysin, mitochondrial OS=Mus musculus OX=10090 GN=Nln PE=1 SV=1	1	1	1	1	704	80.4	6.44
Q6ZQ06	Cep162		Centrosomal protein of 162 kDa OS=Mus musculus OX=10090 GN=Cep162 PE=1 SV=2	1	1	1	1	1403	160.8	5.53
Q7TQH0	Atxn2l		Ataxin-2-like protein OS=Mus musculus OX=10090 GN=Atxn2l PE=1 SV=1	12	10	10	10	1049	110.6	8.85
Q06185	Atp5me		ATP synthase subunit e, mitochondrial OS=Mus musculus OX=10090 GN=Atp5me PE=1 SV=2	35	3	3	3	71	8.2	9.35
P54823	Ddx6		Probable ATP-dependent RNA helicase DDX6 OS=Mus musculus OX=10090 GN=Ddx6 PE=1 SV=1	16	6	6	6	483	54.2	8.66
O88574	Sap30		Histone deacetylase complex subunit SAP30 OS=Mus musculus OX=10090 GN=Sap30 PE=1 SV=1	4	1	1	1	220	23.2	9.07
O55022	Pgrmc1		Membrane-associated progesterone receptor component 1 OS=Mus musculus OX=10090 GN=Pgrmc1 PE=1 SV=4	7	1	1	1	195	21.7	4.7
P19253	Rpl13a		60S ribosomal protein L13a OS=Mus musculus OX=10090 GN=Rpl13a PE=1 SV=4	26	5	9	5	203	23.4	11.02
O09061	Psmb1		Proteasome subunit beta type-1 OS=Mus musculus OX=10090 GN=Psmb1 PE=1 SV=1	10	2	3	2	240	26.4	7.81
Q80Y81	Elac2		Zinc phosphodiesterase ELAC protein 2 OS=Mus musculus OX=10090 GN=Elac2 PE=1 SV=1	1	1	1	1	831	92.7	7.34
Q9Z2A7	Dgat1		Diacylglycerol O-acyltransferase 1 OS=Mus musculus OX=10090 GN=Dgat1 PE=1 SV=1	2	1	1	1	498	56.8	9.39
Q99NH0	Ankrd17		Ankyrin repeat domain-containing protein 17 OS=Mus musculus OX=10090 GN=Ankrd17 PE=1 SV=2	1	2	2	2	2603	274	6.52
Q9DC61	Pmpca		Mitochondrial-processing peptidase subunit alpha OS=Mus musculus OX=10090 GN=Pmpca PE=1 SV=1	5	2	2	2	524	58.2	6.83
Q9D0L8	Rnmt		mRNA cap guanine-N7 methyltransferase OS=Mus musculus OX=10090 GN=Rnmt PE=1 SV=1	2	1	1	1	465	53.3	6.48
Q8BK08	Tmem11		Transmembrane protein 11, mitochondrial OS=Mus musculus OX=10090 GN=Tmem11 PE=1 SV=1	5	1	1	1	190	21.3	7.36
Q62167	Ddx3x		ATP-dependent RNA helicase DDX3X OS=Mus musculus OX=10090 GN=Ddx3x PE=1 SV=3	41	23	27	22	662	73.1	7.18
Q6PHZ2	Camk2d		Calcium/calmodulin-dependent protein kinase type II subunit delta OS=Mus musculus OX=10090 GN=Camk2d PE=1 SV=1	16	6	6	6	499	56.3	7.25
Q8BRH0	Tmtc3		Protein O-mannosyl-transferase TMTC3 OS=Mus musculus OX=10090 GN=Tmtc3 PE=1 SV=2	2	2	2	1	920	104.1	8.53
Q60872	Eif1a		Eukaryotic translation initiation factor 1A OS=Mus musculus OX=10090 GN=Eif1a PE=2 SV=3	12	2	2	1	144	16.5	5.24
Q9DBG3	Ap2b1		AP-2 complex subunit beta OS=Mus musculus OX=10090 GN=Ap2b1 PE=1 SV=1	27	20	24	13	937	104.5	5.38
Q9CR11	Yeats4		YEATS domain-containing protein 4 OS=Mus musculus OX=10090 GN=Yeats4 PE=2 SV=1	4	1	1	1	227	26.5	8.41
O08810	Eftud2		116 kDa U5 small nuclear ribonucleoprotein component OS=Mus musculus OX=10090 GN=Eftud2 PE=1 SV=1	29	22	27	21	971	109.3	5
Q9Z110	Aldh18a1		Delta-1-pyrroline-5-carboxylate synthase OS=Mus musculus OX=10090 GN=Aldh18a1 PE=1 SV=2	34	24	31	24	795	87.2	7.55
Q9D7S7	Rpl22l1		60S ribosomal protein L22-like 1 OS=Mus musculus OX=10090 GN=Rpl22l1 PE=1 SV=1	39	3	5	3	122	14.5	9.45
Q9D0F9	Pgm1		Phosphoglucomutase-1 OS=Mus musculus OX=10090 GN=Pgm1 PE=1 SV=4	8	4	4	4	562	61.4	6.57
Q9CPQ8	Atp5mg		ATP synthase subunit g, mitochondrial OS=Mus musculus OX=10090 GN=Atp5mg PE=1 SV=1	27	2	2	2	103	11.4	9.74
Q6A078	Cep290		Centrosomal protein of 290 kDa OS=Mus musculus OX=10090 GN=Cep290 PE=1 SV=2	1	2	2	2	2472	288.9	6.1
P06801	Me1		NADP-dependent malic enzyme OS=Mus musculus OX=10090 GN=Me1 PE=1 SV=2	3	1	1	1	572	63.9	7.44
P53810	Pitpna		Phosphatidylinositol transfer protein alpha isoform OS=Mus musculus OX=10090 GN=Pitpna PE=1 SV=2	5	1	1	1	271	31.9	6.37
Q91V64	Isoc1		Isochorismatase domain-containing protein 1 OS=Mus musculus OX=10090 GN=Isoc1 PE=1 SV=1	17	3	3	3	297	32	7.39
Q8C052	Map1s		Microtubule-associated protein 1S OS=Mus musculus OX=10090 GN=Map1s PE=1 SV=2	13	10	10	10	973	102.9	7.02
P97298	Serpinf1		Pigment epithelium-derived factor OS=Mus musculus OX=10090 GN=Serpinf1 PE=1 SV=2	14	4	4	4	417	46.2	6.98
Q9DCN2	Cyb5r3		NADH-cytochrome b5 reductase 3 OS=Mus musculus OX=10090 GN=Cyb5r3 PE=1 SV=3	33	9	11	9	301	34.1	8.38
Q8CGY8	Ogt		UDP-N-acetylglucosamine--peptide N-acetylglucosaminyltransferase 110 kDa subunit OS=Mus musculus OX=10090 GN=Ogt PE=1 SV=2	1	1	1	1	1046	116.9	6.7
Q9CR68	Uqcrfs1		Cytochrome b-c1 complex subunit Rieske, mitochondrial OS=Mus musculus OX=10090 GN=Uqcrfs1 PE=1 SV=1	21	4	4	4	274	29.3	8.7
Q62187	Ttf1		Transcription termination factor 1 OS=Mus musculus OX=10090 GN=Ttf1 PE=1 SV=2	1	1	1	1	859	97.7	9.38
Q9CWU9	Nup37		Nucleoporin Nup37 OS=Mus musculus OX=10090 GN=Nup37 PE=1 SV=2	10	2	2	2	326	36.7	6.09
P62878	Rbx1		E3 ubiquitin-protein ligase RBX1 OS=Mus musculus OX=10090 GN=Rbx1 PE=1 SV=1	24	2	2	2	108	12.3	6.96
Q52KI8	Srrm1		Serine/arginine repetitive matrix protein 1 OS=Mus musculus OX=10090 GN=Srrm1 PE=1 SV=2	5	4	5	4	946	106.8	11.87
P80316	Cct5		T-complex protein 1 subunit epsilon OS=Mus musculus OX=10090 GN=Cct5 PE=1 SV=1	33	17	18	16	541	59.6	6.02
Q8BWY3	Etf1		Eukaryotic peptide chain release factor subunit 1 OS=Mus musculus OX=10090 GN=Etf1 PE=1 SV=4	20	7	7	7	437	49	5.71
P02469	Lamb1		Laminin subunit beta-1 OS=Mus musculus OX=10090 GN=Lamb1 PE=1 SV=3	2	4	6	4	1786	197	4.94
Q8R480	Nup85		Nuclear pore complex protein Nup85 OS=Mus musculus OX=10090 GN=Nup85 PE=1 SV=1	9	5	5	5	656	74.7	5.57
Q8CIG8	Prmt5		Protein arginine N-methyltransferase 5 OS=Mus musculus OX=10090 GN=Prmt5 PE=1 SV=3	2	1	1	1	637	72.6	6.42
P56671	Maz		Myc-associated zinc finger protein OS=Mus musculus OX=10090 GN=Maz PE=1 SV=1	2	1	1	1	477	48.7	8.95
Q9D3D9	Atp5f1d		ATP synthase subunit delta, mitochondrial OS=Mus musculus OX=10090 GN=Atp5f1d PE=1 SV=1	14	2	2	2	168	17.6	5.08
P46471	Psmc2		26S proteasome regulatory subunit 7 OS=Mus musculus OX=10090 GN=Psmc2 PE=1 SV=5	27	9	9	9	433	48.6	5.95
Q91W39	Ncoa5		Nuclear receptor coactivator 5 OS=Mus musculus OX=10090 GN=Ncoa5 PE=1 SV=1	3	2	2	2	579	65.3	9.82
Q8CHU3	Epn2		Epsin-2 OS=Mus musculus OX=10090 GN=Epn2 PE=1 SV=1	6	3	3	2	595	63.4	8.16
Q60598	Cttn		Src substrate cortactin OS=Mus musculus OX=10090 GN=Cttn PE=1 SV=2	24	14	15	14	546	61.2	5.4
O70494	Sp3		Transcription factor Sp3 OS=Mus musculus OX=10090 GN=Sp3 PE=1 SV=2	3	2	2	2	783	82.3	5.26
Q8R4Y8	Rttn		Rotatin OS=Mus musculus OX=10090 GN=Rttn PE=1 SV=2	0	1	1	1	2226	248.3	6.52
Q8K4Q8	Colec12		Collectin-12 OS=Mus musculus OX=10090 GN=Colec12 PE=1 SV=1	13	9	9	9	742	81.3	5.49
Q62433	Ndrg1		Protein NDRG1 OS=Mus musculus OX=10090 GN=Ndrg1 PE=1 SV=1	9	2	2	2	394	43	6.1
O88379	Baz1a		Bromodomain adjacent to zinc finger domain protein 1A OS=Mus musculus OX=10090 GN=Baz1a PE=1 SV=3	4	4	5	4	1555	178.3	6.54
Q9Z0E1	M1ap		Meiosis 1 arrest protein OS=Mus musculus OX=10090 GN=M1ap PE=1 SV=2	1	1	1	1	529	58.6	6.73
Q8K2K6	Agfg1		Arf-GAP domain and FG repeat-containing protein 1 OS=Mus musculus OX=10090 GN=Agfg1 PE=1 SV=2	2	1	1	1	561	58	8.63
Q99J95	Cdk9		Cyclin-dependent kinase 9 OS=Mus musculus OX=10090 GN=Cdk9 PE=1 SV=1	9	3	3	3	372	42.7	8.79
P31650	Slc6a11		Sodium- and chloride-dependent GABA transporter 3 OS=Mus musculus OX=10090 GN=Slc6a11 PE=1 SV=2	1	1	1	1	627	69.9	6.98
Q99LE6	Abcf2		ATP-binding cassette sub-family F member 2 OS=Mus musculus OX=10090 GN=Abcf2 PE=1 SV=1	13	7	8	7	628	71.7	7.05
O35855	Bcat2		Branched-chain-amino-acid aminotransferase, mitochondrial OS=Mus musculus OX=10090 GN=Bcat2 PE=1 SV=2	2	1	1	1	393	44.1	8.29
P15532	Nme1		Nucleoside diphosphate kinase A OS=Mus musculus OX=10090 GN=Nme1 PE=1 SV=1	54	7	11	4	152	17.2	7.37
Q64152	Btf3		Transcription factor BTF3 OS=Mus musculus OX=10090 GN=Btf3 PE=1 SV=3	41	5	6	5	204	22	9.52
Q99N84	Mrps18b		28S ribosomal protein S18b, mitochondrial OS=Mus musculus OX=10090 GN=Mrps18b PE=1 SV=1	4	1	1	1	254	28.7	8.35
Q8VHY0	Cspg4		Chondroitin sulfate proteoglycan 4 OS=Mus musculus OX=10090 GN=Cspg4 PE=1 SV=3	0	1	1	1	2327	252.2	5.44
Q8BK35	Nop53		Ribosome biogenesis protein NOP53 OS=Mus musculus OX=10090 GN=Nop53 PE=1 SV=1	6	3	3	3	484	55.8	10.35
Q91VR2	Atp5f1c		ATP synthase subunit gamma, mitochondrial OS=Mus musculus OX=10090 GN=Atp5f1c PE=1 SV=1	27	8	10	8	298	32.9	9.01
Q9CQV8	Ywhab		14-3-3 protein beta/alpha OS=Mus musculus OX=10090 GN=Ywhab PE=1 SV=3	36	8	9	4	246	28.1	4.83
P11983	Tcp1		T-complex protein 1 subunit alpha OS=Mus musculus OX=10090 GN=Tcp1 PE=1 SV=3	42	19	22	19	556	60.4	6.16
P42932	Cct8		T-complex protein 1 subunit theta OS=Mus musculus OX=10090 GN=Cct8 PE=1 SV=3	37	18	20	18	548	59.5	5.62
Q8BH95	Echs1		Enoyl-CoA hydratase, mitochondrial OS=Mus musculus OX=10090 GN=Echs1 PE=1 SV=1	26	8	8	8	290	31.5	8.48
Q4VBE8	Wdr18		WD repeat-containing protein 18 OS=Mus musculus OX=10090 GN=Wdr18 PE=1 SV=1	12	4	4	4	431	47.2	6.89
P53811	Pitpnb		Phosphatidylinositol transfer protein beta isoform OS=Mus musculus OX=10090 GN=Pitpnb PE=1 SV=2	4	1	1	1	271	31.5	6.95
P14869	Rplp0		60S acidic ribosomal protein P0 OS=Mus musculus OX=10090 GN=Rplp0 PE=1 SV=3	36	8	10	8	317	34.2	6.25
Q80X85	Mrps7		28S ribosomal protein S7, mitochondrial OS=Mus musculus OX=10090 GN=Mrps7 PE=1 SV=1	22	4	4	4	242	28	9.94
Q920E5	Fdps		Farnesyl pyrophosphate synthase OS=Mus musculus OX=10090 GN=Fdps PE=1 SV=1	32	10	12	10	353	40.6	5.66
P27641	Xrcc5		X-ray repair cross-complementing protein 5 OS=Mus musculus OX=10090 GN=Xrcc5 PE=1 SV=4	4	3	3	3	732	83	5.16
P47857	Pfkm		ATP-dependent 6-phosphofructokinase, muscle type OS=Mus musculus OX=10090 GN=Pfkm PE=1 SV=3	2	1	1	1	780	85.2	8
Q8CGC6	Rbm28		RNA-binding protein 28 OS=Mus musculus OX=10090 GN=Rbm28 PE=1 SV=4	8	5	5	5	750	84.2	9.54
P01029	C4b		Complement C4-B OS=Mus musculus OX=10090 GN=C4b PE=1 SV=3	1	2	2	2	1738	192.8	7.53
P14733	Lmnb1		Lamin-B1 OS=Mus musculus OX=10090 GN=Lmnb1 PE=1 SV=3	45	26	27	22	588	66.7	5.16
Q9DCT2	Ndufs3		NADH dehydrogenase [ubiquinone] iron-sulfur protein 3, mitochondrial OS=Mus musculus OX=10090 GN=Ndufs3 PE=1 SV=2	5	1	1	1	263	30.1	7.17
P62889	Rpl30		60S ribosomal protein L30 OS=Mus musculus OX=10090 GN=Rpl30 PE=1 SV=2	59	5	6	5	115	12.8	9.63
Q922Q8	Lrrc59		Leucine-rich repeat-containing protein 59 OS=Mus musculus OX=10090 GN=Lrrc59 PE=1 SV=1	43	10	12	10	307	34.9	9.52
Q9CWJ9	Atic		Bifunctional purine biosynthesis protein ATIC OS=Mus musculus OX=10090 GN=Atic PE=1 SV=2	32	14	15	14	592	64.2	6.76
Q91VC9	Ghitm		Growth hormone-inducible transmembrane protein OS=Mus musculus OX=10090 GN=Ghitm PE=1 SV=1	9	4	4	4	346	37.3	9.8
Q05CL8	Larp7		La-related protein 7 OS=Mus musculus OX=10090 GN=Larp7 PE=1 SV=2	2	1	1	1	570	64.8	9.54
Q01405	Sec23a		Protein transport protein Sec23A OS=Mus musculus OX=10090 GN=Sec23a PE=1 SV=2	1	1	1	1	765	86.1	7.08
Q8BKZ9	Pdhx		Pyruvate dehydrogenase protein X component, mitochondrial OS=Mus musculus OX=10090 GN=Pdhx PE=1 SV=1	7	3	3	3	501	54	7.75
P57722	Pcbp3		Poly(rC)-binding protein 3 OS=Mus musculus OX=10090 GN=Pcbp3 PE=1 SV=3	24	7	8	2	371	39.3	7.52
Q9D620	Rab11fip1		Rab11 family-interacting protein 1 OS=Mus musculus OX=10090 GN=Rab11fip1 PE=1 SV=2	2	1	1	1	645	70.6	9.47
Q8VBW6	Nae1		NEDD8-activating enzyme E1 regulatory subunit OS=Mus musculus OX=10090 GN=Nae1 PE=1 SV=1	3	1	1	1	534	60.2	5.52
Q60967	Papss1		Bifunctional 3'-phosphoadenosine 5'-phosphosulfate synthase 1 OS=Mus musculus OX=10090 GN=Papss1 PE=1 SV=1	8	5	5	5	624	70.7	6.77
Q3TGF2	Fam107b		Protein FAM107B OS=Mus musculus OX=10090 GN=Fam107b PE=1 SV=2	6	1	1	1	131	15.6	8.31
Q9Z0N1	Eif2s3x		Eukaryotic translation initiation factor 2 subunit 3, X-linked OS=Mus musculus OX=10090 GN=Eif2s3x PE=1 SV=2	39	14	16	14	472	51	8.4
O08709	Prdx6		Peroxiredoxin-6 OS=Mus musculus OX=10090 GN=Prdx6 PE=1 SV=3	54	8	9	8	224	24.9	6.01
Q8BR92	Palm2		Paralemmin-2 OS=Mus musculus OX=10090 GN=Palm2 PE=1 SV=1	10	3	3	2	376	42.1	5.15
Q9ERY9	Erg28		Ergosterol biosynthetic protein 28 homolog OS=Mus musculus OX=10090 GN=Erg28 PE=2 SV=1	6	1	1	1	140	15.8	9.91
Q8C8U0	Ppfibp1		Liprin-beta-1 OS=Mus musculus OX=10090 GN=Ppfibp1 PE=1 SV=3	2	2	2	2	969	108.5	5.49
Q9R0Q3	Tmed2		Transmembrane emp24 domain-containing protein 2 OS=Mus musculus OX=10090 GN=Tmed2 PE=1 SV=1	20	4	5	4	201	22.7	5.17
O55131	Septin7		Septin-7 OS=Mus musculus OX=10090 GN=Septin7 PE=1 SV=1	36	13	16	12	436	50.5	8.57
Q9JI44	Dmap1		DNA methyltransferase 1-associated protein 1 OS=Mus musculus OX=10090 GN=Dmap1 PE=1 SV=1	6	2	2	2	468	53.1	9.5
O55143	Atp2a2		Sarcoplasmic/endoplasmic reticulum calcium ATPase 2 OS=Mus musculus OX=10090 GN=Atp2a2 PE=1 SV=2	20	16	16	16	1044	114.8	5.34
Q9CPS7	Pno1		RNA-binding protein PNO1 OS=Mus musculus OX=10090 GN=Pno1 PE=1 SV=1	6	1	1	1	248	27.4	9.79
Q99020	Hnrnpab		Heterogeneous nuclear ribonucleoprotein A/B OS=Mus musculus OX=10090 GN=Hnrnpab PE=1 SV=1	43	12	13	11	285	30.8	7.91
Q8BSY0	Asph		Aspartyl/asparaginyl beta-hydroxylase OS=Mus musculus OX=10090 GN=Asph PE=1 SV=1	23	11	11	11	741	83	5.08
Q8K4P0	Wdr33		pre-mRNA 3' end processing protein WDR33 OS=Mus musculus OX=10090 GN=Wdr33 PE=1 SV=1	4	5	5	5	1330	145.2	9.13
P35282	Rab21		Ras-related protein Rab-21 OS=Mus musculus OX=10090 GN=Rab21 PE=1 SV=4	5	1	1	1	222	24.1	7.94
Q9D8T7	Slirp		SRA stem-loop-interacting RNA-binding protein, mitochondrial OS=Mus musculus OX=10090 GN=Slirp PE=1 SV=2	11	1	2	1	112	12.6	9.82
O88447	Klc1		Kinesin light chain 1 OS=Mus musculus OX=10090 GN=Klc1 PE=1 SV=3	5	2	2	2	541	61.4	5.68
P47791	Gsr		Glutathione reductase, mitochondrial OS=Mus musculus OX=10090 GN=Gsr PE=1 SV=3	5	2	2	2	500	53.6	7.99
Q9ER63	Tnfrsf23		Tumor necrosis factor receptor superfamily member 23 OS=Mus musculus OX=10090 GN=Tnfrsf23 PE=2 SV=2	6	1	1	1	176	19.6	6.04
Q6PFD9	Nup98		Nuclear pore complex protein Nup98-Nup96 OS=Mus musculus OX=10090 GN=Nup98 PE=1 SV=2	2	3	3	3	1816	197.1	6.18
Q91VS7	Mgst1		Microsomal glutathione S-transferase 1 OS=Mus musculus OX=10090 GN=Mgst1 PE=1 SV=3	8	1	1	1	155	17.5	9.66
Q61468	Msln		Mesothelin OS=Mus musculus OX=10090 GN=Msln PE=1 SV=1	5	3	3	3	625	69.4	7.59
P17665	Cox7c		Cytochrome c oxidase subunit 7C, mitochondrial OS=Mus musculus OX=10090 GN=Cox7c PE=1 SV=1	14	1	1	1	63	7.3	11
Q05769	Ptgs2		Prostaglandin G/H synthase 2 OS=Mus musculus OX=10090 GN=Ptgs2 PE=1 SV=1	3	2	2	1	604	69	7.37
Q7TQI3	Otub1		Ubiquitin thioesterase OTUB1 OS=Mus musculus OX=10090 GN=Otub1 PE=1 SV=2	23	5	5	5	271	31.3	4.94
Q497V5	Srbd1		S1 RNA-binding domain-containing protein 1 OS=Mus musculus OX=10090 GN=Srbd1 PE=2 SV=3	1	1	1	1	982	110.2	8.78
Q8BTS4	Nup54		Nuclear pore complex protein Nup54 OS=Mus musculus OX=10090 GN=Nup54 PE=1 SV=1	5	2	3	2	510	55.7	7.02
P56812	Pdcd5		Programmed cell death protein 5 OS=Mus musculus OX=10090 GN=Pdcd5 PE=1 SV=3	16	2	2	2	126	14.3	5.68
Q8VEH3	Arl8a		ADP-ribosylation factor-like protein 8A OS=Mus musculus OX=10090 GN=Arl8a PE=1 SV=1	10	2	2	2	186	21.4	7.77
P29595	Nedd8		NEDD8 OS=Mus musculus OX=10090 GN=Nedd8 PE=1 SV=2	17	1	1	1	81	9	7.25
Q9ESZ8	Gtf2i		General transcription factor II-I OS=Mus musculus OX=10090 GN=Gtf2i PE=1 SV=3	11	10	10	10	998	112.2	6.55
Q9DCE5	Pak1ip1		p21-activated protein kinase-interacting protein 1 OS=Mus musculus OX=10090 GN=Pak1ip1 PE=1 SV=2	6	2	2	2	382	42.1	8.47
Q9D0I9	Rars1		Arginine--tRNA ligase, cytoplasmic OS=Mus musculus OX=10090 GN=Rars1 PE=1 SV=2	23	14	14	14	660	75.6	7.55
P24527	Lta4h		Leukotriene A-4 hydrolase OS=Mus musculus OX=10090 GN=Lta4h PE=1 SV=4	16	8	8	8	611	69	6.42
Q6PDI5	Ecpas		Proteasome adapter and scaffold protein ECM29 OS=Mus musculus OX=10090 GN=Ecpas PE=1 SV=3	1	2	2	2	1840	203.6	7.06
Q8CG70	P3h3		Prolyl 3-hydroxylase 3 OS=Mus musculus OX=10090 GN=P3h3 PE=1 SV=1	2	2	2	2	732	81.7	6.65
Q9CQ71	Rpa3		Replication protein A 14 kDa subunit OS=Mus musculus OX=10090 GN=Rpa3 PE=1 SV=1	9	1	1	1	121	13.6	4.84
Q9D1M4	Eef1e1		Eukaryotic translation elongation factor 1 epsilon-1 OS=Mus musculus OX=10090 GN=Eef1e1 PE=1 SV=1	10	2	2	2	174	19.8	8.59
P63242	Eif5a		Eukaryotic translation initiation factor 5A-1 OS=Mus musculus OX=10090 GN=Eif5a PE=1 SV=2	68	8	10	8	154	16.8	5.24
Q80WJ7	Mtdh		Protein LYRIC OS=Mus musculus OX=10090 GN=Mtdh PE=1 SV=1	6	3	3	3	579	63.8	9.33
Q8VE19	Mios		GATOR complex protein MIOS OS=Mus musculus OX=10090 GN=Mios PE=1 SV=2	1	1	1	1	875	98.3	6.71
Q6ZQ08	Cnot1		CCR4-NOT transcription complex subunit 1 OS=Mus musculus OX=10090 GN=Cnot1 PE=1 SV=2	5	12	12	12	2375	266.6	7.11
P97742	Cpt1a		Carnitine O-palmitoyltransferase 1, liver isoform OS=Mus musculus OX=10090 GN=Cpt1a PE=1 SV=4	1	1	1	1	773	88.2	8.62
Q9CX30	Yif1b		Protein YIF1B OS=Mus musculus OX=10090 GN=Yif1b PE=1 SV=2	4	1	1	1	311	34	9.14
Q9CZ13	Uqcrc1		Cytochrome b-c1 complex subunit 1, mitochondrial OS=Mus musculus OX=10090 GN=Uqcrc1 PE=1 SV=2	31	12	14	11	480	52.8	6.21
Q7TMK9	Syncrip		Heterogeneous nuclear ribonucleoprotein Q OS=Mus musculus OX=10090 GN=Syncrip PE=1 SV=2	43	22	27	22	623	69.6	8.59
Q9Z1F9	Uba2		SUMO-activating enzyme subunit 2 OS=Mus musculus OX=10090 GN=Uba2 PE=1 SV=1	9	5	5	5	638	70.5	5.24
P05132	Prkaca		cAMP-dependent protein kinase catalytic subunit alpha OS=Mus musculus OX=10090 GN=Prkaca PE=1 SV=3	5	2	2	2	351	40.5	8.79
Q99N95	Mrpl3		39S ribosomal protein L3, mitochondrial OS=Mus musculus OX=10090 GN=Mrpl3 PE=1 SV=1	2	1	1	1	348	39.1	9.55
Q8K2B3	Sdha		Succinate dehydrogenase [ubiquinone] flavoprotein subunit, mitochondrial OS=Mus musculus OX=10090 GN=Sdha PE=1 SV=1	16	6	6	6	664	72.5	7.37
Q6R0H7	Gnas		Guanine nucleotide-binding protein G(s) subunit alpha isoforms XLas OS=Mus musculus OX=10090 GN=Gnas PE=1 SV=1	11	9	9	8	1133	121.4	4.81
Q9CRD0	Ociad1		OCIA domain-containing protein 1 OS=Mus musculus OX=10090 GN=Ociad1 PE=1 SV=1	19	3	4	3	247	27.6	7.81
Q9JKP7	Pole3		DNA polymerase epsilon subunit 3 OS=Mus musculus OX=10090 GN=Pole3 PE=1 SV=1	8	1	1	1	145	16.6	4.74
P49817	Cav1		Caveolin-1 OS=Mus musculus OX=10090 GN=Cav1 PE=1 SV=1	47	7	10	7	178	20.5	6.02
Q9WVR4	Fxr2		RNA-binding protein FXR2 OS=Mus musculus OX=10090 GN=Fxr2 PE=1 SV=1	9	5	5	4	673	73.7	6.23
Q9CW03	Smc3		Structural maintenance of chromosomes protein 3 OS=Mus musculus OX=10090 GN=Smc3 PE=1 SV=2	22	23	23	23	1217	141.5	7.18
Q8BI72	Cdkn2aip		CDKN2A-interacting protein OS=Mus musculus OX=10090 GN=Cdkn2aip PE=1 SV=1	7	3	3	3	563	59.7	9.16
P34022	Ranbp1		Ran-specific GTPase-activating protein OS=Mus musculus OX=10090 GN=Ranbp1 PE=1 SV=2	35	6	6	6	203	23.6	5.22
Q9Z2Q5	Mrpl40		39S ribosomal protein L40, mitochondrial OS=Mus musculus OX=10090 GN=Mrpl40 PE=1 SV=2	4	1	1	1	206	24.3	9.47
Q80U72	Scrib		Protein scribble homolog OS=Mus musculus OX=10090 GN=Scrib PE=1 SV=2	1	2	2	2	1612	174	5.12
Q64433	Hspe1		10 kDa heat shock protein, mitochondrial OS=Mus musculus OX=10090 GN=Hspe1 PE=1 SV=2	66	8	8	8	102	11	8.35
Q7TPD0	Ints3		Integrator complex subunit 3 OS=Mus musculus OX=10090 GN=Ints3 PE=1 SV=2	2	2	2	2	1041	117.9	5.8
Q9CY50	Ssr1		Translocon-associated protein subunit alpha OS=Mus musculus OX=10090 GN=Ssr1 PE=1 SV=1	12	3	4	3	286	32	4.45
B1AZI6	Thoc2		THO complex subunit 2 OS=Mus musculus OX=10090 GN=Thoc2 PE=1 SV=1	4	5	5	5	1594	182.7	8.44
Q91Z38	Ttc1		Tetratricopeptide repeat protein 1 OS=Mus musculus OX=10090 GN=Ttc1 PE=1 SV=1	3	1	1	1	292	33.2	5.01
P62077	Timm8b		Mitochondrial import inner membrane translocase subunit Tim8 B OS=Mus musculus OX=10090 GN=Timm8b PE=1 SV=1	10	1	1	1	83	9.3	5.12
Q9CX86	Hnrnpa0		Heterogeneous nuclear ribonucleoprotein A0 OS=Mus musculus OX=10090 GN=Hnrnpa0 PE=1 SV=1	30	8	11	6	305	30.5	9.31
Q8R349	Cdc16		Cell division cycle protein 16 homolog OS=Mus musculus OX=10090 GN=Cdc16 PE=1 SV=1	5	3	3	3	620	71.4	5.76
Q80V62	Fancd2		Fanconi anemia group D2 protein homolog OS=Mus musculus OX=10090 GN=Fancd2 PE=1 SV=2	0	1	1	1	1450	163.5	6.32
Q6NWW9	Fndc3b		Fibronectin type III domain-containing protein 3B OS=Mus musculus OX=10090 GN=Fndc3b PE=1 SV=1	2	2	2	2	1207	132.7	6.29
P16951	Atf2		Cyclic AMP-dependent transcription factor ATF-2 OS=Mus musculus OX=10090 GN=Atf2 PE=1 SV=2	2	1	1	1	487	52.3	7.23
Q9CT10	Ranbp3		Ran-binding protein 3 OS=Mus musculus OX=10090 GN=Ranbp3 PE=1 SV=2	2	1	1	1	491	52.5	5.12
Q61578	Fdxr		NADPH:adrenodoxin oxidoreductase, mitochondrial OS=Mus musculus OX=10090 GN=Fdxr PE=1 SV=1	3	1	1	1	494	54.2	8.66
O88456	Capns1		Calpain small subunit 1 OS=Mus musculus OX=10090 GN=Capns1 PE=1 SV=2	6	1	1	1	268	28.4	5.63
Q8BKX1	Baiap2		Brain-specific angiogenesis inhibitor 1-associated protein 2 OS=Mus musculus OX=10090 GN=Baiap2 PE=1 SV=2	7	4	4	4	535	59.2	9.04
Q8R323	Rfc3		Replication factor C subunit 3 OS=Mus musculus OX=10090 GN=Rfc3 PE=1 SV=1	16	4	4	4	356	40.5	8.38
Q9ET30	Tm9sf3		Transmembrane 9 superfamily member 3 OS=Mus musculus OX=10090 GN=Tm9sf3 PE=1 SV=1	3	2	2	2	587	67.5	7.21
P15379	Cd44		CD44 antigen OS=Mus musculus OX=10090 GN=Cd44 PE=1 SV=3	4	3	4	3	778	85.6	4.96
Q9D0B0	Srsf9		Serine/arginine-rich splicing factor 9 OS=Mus musculus OX=10090 GN=Srsf9 PE=1 SV=1	9	2	2	2	222	25.6	8.65
Q9JMA1	Usp14		Ubiquitin carboxyl-terminal hydrolase 14 OS=Mus musculus OX=10090 GN=Usp14 PE=1 SV=3	16	7	7	7	493	56	5.24
Q8K2F8	Lsm14a		Protein LSM14 homolog A OS=Mus musculus OX=10090 GN=Lsm14a PE=1 SV=1	2	1	1	1	462	50.5	9.52
Q9Z207	Diaph3		Protein diaphanous homolog 3 OS=Mus musculus OX=10090 GN=Diaph3 PE=1 SV=1	1	1	1	1	1171	133.6	7.61
Q64318	Zeb1		Zinc finger E-box-binding homeobox 1 OS=Mus musculus OX=10090 GN=Zeb1 PE=1 SV=1	1	1	1	1	1117	122.4	4.88
Q9DBG7	Srpra		Signal recognition particle receptor subunit alpha OS=Mus musculus OX=10090 GN=Srpra PE=1 SV=1	3	2	2	2	636	69.6	8.95
Q8C0Q3	Ttc34		Tetratricopeptide repeat protein 34 OS=Mus musculus OX=10090 GN=Ttc34 PE=2 SV=2	1	1	1	1	554	60.2	6.61
O09117	Sypl1		Synaptophysin-like protein 1 OS=Mus musculus OX=10090 GN=Sypl1 PE=1 SV=2	4	1	1	1	261	28.9	8.79
O35459	Ech1		Delta(3,5)-Delta(2,4)-dienoyl-CoA isomerase, mitochondrial OS=Mus musculus OX=10090 GN=Ech1 PE=1 SV=1	6	2	2	2	327	36.1	7.71
Q9R0N0	Galk1		Galactokinase OS=Mus musculus OX=10090 GN=Galk1 PE=1 SV=2	6	2	2	2	392	42.3	5.26
O35864	Cops5		COP9 signalosome complex subunit 5 OS=Mus musculus OX=10090 GN=Cops5 PE=1 SV=3	7	2	2	2	334	37.5	6.54
Q8BX02	Kank2		KN motif and ankyrin repeat domain-containing protein 2 OS=Mus musculus OX=10090 GN=Kank2 PE=1 SV=1	5	3	3	3	843	90.2	5.55
Q8CGC7	Eprs1		Bifunctional glutamate/proline--tRNA ligase OS=Mus musculus OX=10090 GN=Eprs1 PE=1 SV=4	18	22	22	22	1512	170	7.66
Q64133	Maoa		Amine oxidase [flavin-containing] A OS=Mus musculus OX=10090 GN=Maoa PE=1 SV=3	4	2	2	2	526	59.6	7.81
Q6GQT9	Nomo1		BOS complex subunit NOMO1 OS=Mus musculus OX=10090 GN=Nomo1 PE=1 SV=1	6	6	6	6	1214	133.3	6.09
Q9WV80	Snx1		Sorting nexin-1 OS=Mus musculus OX=10090 GN=Snx1 PE=1 SV=1	2	1	1	1	522	58.9	5.22
Q00623	Apoa1		Apolipoprotein A-I OS=Mus musculus OX=10090 GN=Apoa1 PE=1 SV=2	4	1	1	1	264	30.6	5.73
Q8R0F6	Ilkap		Integrin-linked kinase-associated serine/threonine phosphatase 2C OS=Mus musculus OX=10090 GN=Ilkap PE=1 SV=1	2	1	1	1	392	42.7	7.36
Q80X50	Ubap2l		Ubiquitin-associated protein 2-like OS=Mus musculus OX=10090 GN=Ubap2l PE=1 SV=1	8	8	8	8	1107	116.7	7.11
Q62419	Sh3gl1		Endophilin-A2 OS=Mus musculus OX=10090 GN=Sh3gl1 PE=1 SV=1	3	1	1	1	368	41.5	5.72
Q8R326	Pspc1		Paraspeckle component 1 OS=Mus musculus OX=10090 GN=Pspc1 PE=1 SV=1	14	6	6	5	523	58.7	6.67
Q5SWD9	Tsr1		Pre-rRNA-processing protein TSR1 homolog OS=Mus musculus OX=10090 GN=Tsr1 PE=1 SV=1	2	2	2	2	803	92	6.99
Q8BQ30	Ppp1r18		Phostensin OS=Mus musculus OX=10090 GN=Ppp1r18 PE=1 SV=1	9	6	6	6	594	65.6	5.39
Q9WVH9	Fbln5		Fibulin-5 OS=Mus musculus OX=10090 GN=Fbln5 PE=1 SV=1	2	1	1	1	448	50.2	4.7
Q8CFE6	Slc38a2		Sodium-coupled neutral amino acid symporter 2 OS=Mus musculus OX=10090 GN=Slc38a2 PE=1 SV=1	3	1	1	1	504	55.5	7.94
Q8K2C7	Os9		Protein OS-9 OS=Mus musculus OX=10090 GN=Os9 PE=1 SV=2	1	1	1	1	672	76.1	4.84
P51125	Cast		Calpastatin OS=Mus musculus OX=10090 GN=Cast PE=1 SV=2	3	2	2	2	788	84.9	5.52
Q99JX4	Eif3m		Eukaryotic translation initiation factor 3 subunit M OS=Mus musculus OX=10090 GN=Eif3m PE=1 SV=1	23	7	8	7	374	42.5	5.74
Q9D1Q6	Erp44		Endoplasmic reticulum resident protein 44 OS=Mus musculus OX=10090 GN=Erp44 PE=1 SV=1	15	5	6	4	406	46.8	5.27
P06869	Plau		Urokinase-type plasminogen activator OS=Mus musculus OX=10090 GN=Plau PE=1 SV=1	3	1	1	1	433	48.2	8.16
Q3TXX3	Zfyve27		Protrudin OS=Mus musculus OX=10090 GN=Zfyve27 PE=1 SV=2	3	1	1	1	415	46.2	5.35
P55264	Adk		Adenosine kinase OS=Mus musculus OX=10090 GN=Adk PE=1 SV=2	11	4	4	4	361	40.1	6.21
Q80UZ2	Sdad1		Protein SDA1 homolog OS=Mus musculus OX=10090 GN=Sdad1 PE=1 SV=1	2	1	1	1	687	79.5	9.2
Q1HFZ0	Nsun2		RNA cytosine C(5)-methyltransferase NSUN2 OS=Mus musculus OX=10090 GN=Nsun2 PE=1 SV=2	20	11	11	11	757	85.4	6.58
Q8C0I1	Agps		Alkyldihydroxyacetonephosphate synthase, peroxisomal OS=Mus musculus OX=10090 GN=Agps PE=1 SV=1	2	1	1	1	645	71.6	7.5
Q9D0K2	Oxct1		Succinyl-CoA:3-ketoacid coenzyme A transferase 1, mitochondrial OS=Mus musculus OX=10090 GN=Oxct1 PE=1 SV=1	20	8	8	8	520	56	8.53
Q9CPQ1	Cox6c		Cytochrome c oxidase subunit 6C OS=Mus musculus OX=10090 GN=Cox6c PE=1 SV=3	36	3	3	3	76	8.5	10.14
Q9ESX5	Dkc1		H/ACA ribonucleoprotein complex subunit DKC1 OS=Mus musculus OX=10090 GN=Dkc1 PE=1 SV=4	28	10	10	10	509	57.4	9.28
Q8CJF7	Ahctf1		Protein ELYS OS=Mus musculus OX=10090 GN=Ahctf1 PE=1 SV=1	0	1	1	1	2243	247.5	6.55
Q65Z40	Wapl		Wings apart-like protein homolog OS=Mus musculus OX=10090 GN=Wapl PE=1 SV=2	3	3	3	3	1200	134	5.41
P47880	Igfbp6		Insulin-like growth factor-binding protein 6 OS=Mus musculus OX=10090 GN=Igfbp6 PE=2 SV=2	6	1	1	1	238	25.3	8.19
Q64695	Procr		Endothelial protein C receptor OS=Mus musculus OX=10090 GN=Procr PE=1 SV=3	5	1	1	1	242	27.2	5.97
P62960	Ybx1		Y-box-binding protein 1 OS=Mus musculus OX=10090 GN=Ybx1 PE=1 SV=3	42	10	12	7	322	35.7	9.88
Q8VHR5	Gatad2b		Transcriptional repressor p66-beta OS=Mus musculus OX=10090 GN=Gatad2b PE=1 SV=1	9	4	4	4	594	65.4	9.7
Q9R0E2	Plod1		Procollagen-lysine,2-oxoglutarate 5-dioxygenase 1 OS=Mus musculus OX=10090 GN=Plod1 PE=1 SV=1	4	2	2	2	728	83.5	6.54
Q8CIE6	Copa		Coatomer subunit alpha OS=Mus musculus OX=10090 GN=Copa PE=1 SV=2	8	8	8	8	1224	138.3	7.65
Q925E7	Ppp2r2d		Serine/threonine-protein phosphatase 2A 55 kDa regulatory subunit B delta isoform OS=Mus musculus OX=10090 GN=Ppp2r2d PE=1 SV=1	3	1	1	1	453	51.9	6.49
P36552	Cpox		Oxygen-dependent coproporphyrinogen-III oxidase, mitochondrial OS=Mus musculus OX=10090 GN=Cpox PE=1 SV=2	2	1	1	1	443	49.7	8.53
P62737	Acta2		Actin, aortic smooth muscle OS=Mus musculus OX=10090 GN=Acta2 PE=1 SV=1	68	18	65	9	377	42	5.39
Q8BH04	Pck2		Phosphoenolpyruvate carboxykinase [GTP], mitochondrial OS=Mus musculus OX=10090 GN=Pck2 PE=1 SV=1	6	3	3	3	640	70.5	7.28
P99027	Rplp2		60S acidic ribosomal protein P2 OS=Mus musculus OX=10090 GN=Rplp2 PE=1 SV=3	70	5	8	5	115	11.6	4.54
O09106	Hdac1		Histone deacetylase 1 OS=Mus musculus OX=10090 GN=Hdac1 PE=1 SV=1	15	7	9	7	482	55	5.48
O88559	Men1		Menin OS=Mus musculus OX=10090 GN=Men1 PE=1 SV=2	2	1	1	1	611	67.5	6.39
Q3U1J4	Ddb1		DNA damage-binding protein 1 OS=Mus musculus OX=10090 GN=Ddb1 PE=1 SV=2	12	13	13	13	1140	126.8	5.26
Q9WTX5	Skp1		S-phase kinase-associated protein 1 OS=Mus musculus OX=10090 GN=Skp1 PE=1 SV=3	17	3	3	3	163	18.7	4.54
Q91VA6	Poldip2		Polymerase delta-interacting protein 2 OS=Mus musculus OX=10090 GN=Poldip2 PE=1 SV=1	3	1	1	1	368	41.8	8.63
Q9WVJ2	Psmd13		26S proteasome non-ATPase regulatory subunit 13 OS=Mus musculus OX=10090 GN=Psmd13 PE=1 SV=1	19	7	7	7	376	42.8	5.71
Q6PIP5	Nudcd1		NudC domain-containing protein 1 OS=Mus musculus OX=10090 GN=Nudcd1 PE=1 SV=2	2	1	1	1	582	66.7	5.3
P08775	Polr2a		DNA-directed RNA polymerase II subunit RPB1 OS=Mus musculus OX=10090 GN=Polr2a PE=1 SV=3	1	1	1	1	1970	217	7.37
Q62523	Zyx		Zyxin OS=Mus musculus OX=10090 GN=Zyx PE=1 SV=2	12	5	5	5	564	60.5	6.4
Q9CQ92	Fis1		Mitochondrial fission 1 protein OS=Mus musculus OX=10090 GN=Fis1 PE=1 SV=1	26	3	3	3	152	17	8.53
Q8CCS6	Pabpn1		Polyadenylate-binding protein 2 OS=Mus musculus OX=10090 GN=Pabpn1 PE=1 SV=3	10	3	3	3	302	32.3	5.17
Q9CQ65	Mtap		S-methyl-5'-thioadenosine phosphorylase OS=Mus musculus OX=10090 GN=Mtap PE=1 SV=1	43	8	9	8	283	31	7.14
Q9EP97	Senp3		Sentrin-specific protease 3 OS=Mus musculus OX=10090 GN=Senp3 PE=1 SV=1	15	7	7	7	568	64.4	8.75
Q7TNC4	Luc7l2		Putative RNA-binding protein Luc7-like 2 OS=Mus musculus OX=10090 GN=Luc7l2 PE=1 SV=1	20	8	10	3	392	46.6	10.1
Q9CPN8	Igf2bp3		Insulin-like growth factor 2 mRNA-binding protein 3 OS=Mus musculus OX=10090 GN=Igf2bp3 PE=1 SV=1	27	11	11	8	579	63.5	8.87
Q91ZA3	Pcca		Propionyl-CoA carboxylase alpha chain, mitochondrial OS=Mus musculus OX=10090 GN=Pcca PE=1 SV=2	2	1	1	1	724	79.9	7.25
Q9R0Q4	Morf4l2		Mortality factor 4-like protein 2 OS=Mus musculus OX=10090 GN=Morf4l2 PE=1 SV=1	4	1	1	1	288	32.2	9.72
Q80UU9	Pgrmc2		Membrane-associated progesterone receptor component 2 OS=Mus musculus OX=10090 GN=Pgrmc2 PE=1 SV=2	9	1	1	1	217	23.3	5.15
Q8R361	Rab11fip5		Rab11 family-interacting protein 5 OS=Mus musculus OX=10090 GN=Rab11fip5 PE=1 SV=2	2	1	1	1	645	69.5	9.07
P70227	Itpr3		Inositol 1,4,5-trisphosphate receptor type 3 OS=Mus musculus OX=10090 GN=Itpr3 PE=1 SV=3	0	1	1	1	2670	304.1	6.54
Q62188	Dpysl3		Dihydropyrimidinase-related protein 3 OS=Mus musculus OX=10090 GN=Dpysl3 PE=1 SV=1	8	3	3	2	570	61.9	6.49
P55258	Rab8a		Ras-related protein Rab-8A OS=Mus musculus OX=10090 GN=Rab8a PE=1 SV=2	14	3	5	1	207	23.7	9.07
Q9D662	Sec23b		Protein transport protein Sec23B OS=Mus musculus OX=10090 GN=Sec23b PE=1 SV=1	3	2	2	2	767	86.4	6.96
Q8BLH7	Hirip3		HIRA-interacting protein 3 OS=Mus musculus OX=10090 GN=Hirip3 PE=1 SV=1	1	1	1	1	601	65.2	7.84
Q9JLQ0	Cd2ap		CD2-associated protein OS=Mus musculus OX=10090 GN=Cd2ap PE=1 SV=3	1	1	1	1	637	70.4	6.38
Q61838	Pzp		Pregnancy zone protein OS=Mus musculus OX=10090 GN=Pzp PE=1 SV=3	1	1	1	1	1495	165.7	6.68
Q9EQS3	Mycbp		c-Myc-binding protein OS=Mus musculus OX=10090 GN=Mycbp PE=1 SV=5	11	1	1	1	103	12	5.91
O70310	Nmt1		Glycylpeptide N-tetradecanoyltransferase 1 OS=Mus musculus OX=10090 GN=Nmt1 PE=1 SV=1	28	10	10	6	496	56.9	8
P70333	Hnrnph2		Heterogeneous nuclear ribonucleoprotein H2 OS=Mus musculus OX=10090 GN=Hnrnph2 PE=1 SV=1	22	7	14	1	449	49.2	6.3
P30681	Hmgb2		High mobility group protein B2 OS=Mus musculus OX=10090 GN=Hmgb2 PE=1 SV=3	40	10	15	9	210	24.1	7.31
Q62417	Sorbs1		Sorbin and SH3 domain-containing protein 1 OS=Mus musculus OX=10090 GN=Sorbs1 PE=1 SV=2	4	4	4	4	1290	143	8.25
Q61035	Hars1		Histidine--tRNA ligase, cytoplasmic OS=Mus musculus OX=10090 GN=Hars1 PE=1 SV=2	7	4	4	4	509	57.4	6
Q5SYD0	Myo1d		Unconventional myosin-Id OS=Mus musculus OX=10090 GN=Myo1d PE=1 SV=1	15	12	12	12	1006	116	9.41
P0DP26	Calm1		Calmodulin-1 OS=Mus musculus OX=10090 GN=Calm1 PE=1 SV=1	58	10	15	10	149	16.8	4.22
P12382	Pfkl		ATP-dependent 6-phosphofructokinase, liver type OS=Mus musculus OX=10090 GN=Pfkl PE=1 SV=4	8	5	5	5	780	85.3	7.17
Q9Z2I8	Suclg2		Succinate--CoA ligase [GDP-forming] subunit beta, mitochondrial OS=Mus musculus OX=10090 GN=Suclg2 PE=1 SV=3	15	5	5	5	433	46.8	7.02
Q9CZN7	Shmt2		Serine hydroxymethyltransferase, mitochondrial OS=Mus musculus OX=10090 GN=Shmt2 PE=1 SV=1	54	22	31	22	504	55.7	8.47
A2ALW5	Dnajc25		DnaJ homolog subfamily C member 25 OS=Mus musculus OX=10090 GN=Dnajc25 PE=1 SV=1	3	1	1	1	357	41.9	9.11
Q6P1B1	Xpnpep1		Xaa-Pro aminopeptidase 1 OS=Mus musculus OX=10090 GN=Xpnpep1 PE=1 SV=1	7	4	4	4	623	69.5	5.54
Q921J2	Rheb		GTP-binding protein Rheb OS=Mus musculus OX=10090 GN=Rheb PE=1 SV=1	4	1	1	1	184	20.4	5.92
Q62425	Ndufa4		Cytochrome c oxidase subunit NDUFA4 OS=Mus musculus OX=10090 GN=Ndufa4 PE=1 SV=2	26	2	2	2	82	9.3	9.52
Q6PDQ2	Chd4		Chromodomain-helicase-DNA-binding protein 4 OS=Mus musculus OX=10090 GN=Chd4 PE=1 SV=1	15	24	27	24	1915	217.6	5.81
Q9CX34	Sugt1		Protein SGT1 homolog OS=Mus musculus OX=10090 GN=Sugt1 PE=1 SV=3	12	4	4	4	336	38.1	5.45
P53569	Cebpz		CCAAT/enhancer-binding protein zeta OS=Mus musculus OX=10090 GN=Cebpz PE=1 SV=2	3	3	3	3	1052	120.2	5.74
Q9CXW3	Cacybp		Calcyclin-binding protein OS=Mus musculus OX=10090 GN=Cacybp PE=1 SV=1	57	10	10	10	229	26.5	7.87
Q8C854	Myef2		Myelin expression factor 2 OS=Mus musculus OX=10090 GN=Myef2 PE=1 SV=1	24	13	14	13	591	63.3	8.87
Q8R550	Sh3kbp1		SH3 domain-containing kinase-binding protein 1 OS=Mus musculus OX=10090 GN=Sh3kbp1 PE=1 SV=1	1	1	1	1	709	78.1	7.55
Q7TMR0	Prcp		Lysosomal Pro-X carboxypeptidase OS=Mus musculus OX=10090 GN=Prcp PE=1 SV=2	3	1	2	1	491	55	6.79
Q9QXK2	Rad18		E3 ubiquitin-protein ligase RAD18 OS=Mus musculus OX=10090 GN=Rad18 PE=1 SV=2	2	1	1	1	509	57.4	7.24
Q61425	Hadh		Hydroxyacyl-coenzyme A dehydrogenase, mitochondrial OS=Mus musculus OX=10090 GN=Hadh PE=1 SV=2	37	7	7	7	314	34.4	8.65
Q61598	Gdi2		Rab GDP dissociation inhibitor beta OS=Mus musculus OX=10090 GN=Gdi2 PE=1 SV=1	42	14	16	14	445	50.5	6.25
Q8K411	Pitrm1		Presequence protease, mitochondrial OS=Mus musculus OX=10090 GN=Pitrm1 PE=1 SV=1	7	6	7	6	1036	117.3	7.2
O88545	Cops6		COP9 signalosome complex subunit 6 OS=Mus musculus OX=10090 GN=Cops6 PE=1 SV=1	7	2	2	2	324	35.9	5.73
Q04857	Col6a1		Collagen alpha-1(VI) chain OS=Mus musculus OX=10090 GN=Col6a1 PE=1 SV=1	12	10	10	10	1025	108.4	5.36
Q80UG5	Septin9		Septin-9 OS=Mus musculus OX=10090 GN=Septin9 PE=1 SV=1	28	14	14	14	583	65.5	8.9
Q91YR9	Ptgr1		Prostaglandin reductase 1 OS=Mus musculus OX=10090 GN=Ptgr1 PE=1 SV=2	12	3	3	3	329	35.5	7.96
O88441	Mtx2		Metaxin-2 OS=Mus musculus OX=10090 GN=Mtx2 PE=1 SV=1	8	2	2	2	263	29.7	5.63
Q8BWT1	Acaa2		3-ketoacyl-CoA thiolase, mitochondrial OS=Mus musculus OX=10090 GN=Acaa2 PE=1 SV=3	18	5	6	5	397	41.8	8.09
Q91WJ8	Fubp1		Far upstream element-binding protein 1 OS=Mus musculus OX=10090 GN=Fubp1 PE=1 SV=1	27	15	17	13	651	68.5	7.93
P50637	Tspo		Translocator protein OS=Mus musculus OX=10090 GN=Tspo PE=1 SV=1	8	1	1	1	169	18.8	9.52
Q9D7G0	Prps1		Ribose-phosphate pyrophosphokinase 1 OS=Mus musculus OX=10090 GN=Prps1 PE=1 SV=4	6	2	2	2	318	34.8	6.98
P27601	Gna13		Guanine nucleotide-binding protein subunit alpha-13 OS=Mus musculus OX=10090 GN=Gna13 PE=1 SV=1	6	2	2	1	377	44	8.21
Q8QZY9	Sf3b4		Splicing factor 3B subunit 4 OS=Mus musculus OX=10090 GN=Sf3b4 PE=1 SV=1	8	2	2	2	424	44.3	8.56
Q9CQF3	Nudt21		Cleavage and polyadenylation specificity factor subunit 5 OS=Mus musculus OX=10090 GN=Nudt21 PE=1 SV=1	46	10	11	10	227	26.2	8.82
P62264	Rps14		40S ribosomal protein S14 OS=Mus musculus OX=10090 GN=Rps14 PE=1 SV=3	36	5	7	5	151	16.3	10.05
Q8BMF4	Dlat		Dihydrolipoyllysine-residue acetyltransferase component of pyruvate dehydrogenase complex, mitochondrial OS=Mus musculus OX=10090 GN=Dlat PE=1 SV=2	12	6	6	6	642	67.9	8.57
Q6P8X1	Snx6		Sorting nexin-6 OS=Mus musculus OX=10090 GN=Snx6 PE=1 SV=2	11	4	4	4	406	46.6	6.16
P70452	Stx4		Syntaxin-4 OS=Mus musculus OX=10090 GN=Stx4 PE=1 SV=1	4	1	1	1	298	34.1	6.14
Q8BHL4	Gprc5a		Retinoic acid-induced protein 3 OS=Mus musculus OX=10090 GN=Gprc5a PE=1 SV=1	4	1	1	1	356	40.1	7.62
P56873	Znrd2		Protein ZNRD2 OS=Mus musculus OX=10090 GN=Znrd2 PE=1 SV=1	9	1	1	1	199	21.3	5.12
P63321	Rala		Ras-related protein Ral-A OS=Mus musculus OX=10090 GN=Rala PE=1 SV=1	14	3	3	2	206	23.5	7.11
P14576	Srp54		Signal recognition particle subunit SRP54 OS=Mus musculus OX=10090 GN=Srp54 PE=1 SV=2	7	3	3	3	504	55.7	8.75
Q9Z2I0	Letm1		Mitochondrial proton/calcium exchanger protein OS=Mus musculus OX=10090 GN=Letm1 PE=1 SV=1	2	2	2	2	738	82.9	6.52
Q9DBP5	Cmpk1		UMP-CMP kinase OS=Mus musculus OX=10090 GN=Cmpk1 PE=1 SV=1	17	3	3	3	196	22.2	5.83
O88685	Psmc3		26S proteasome regulatory subunit 6A OS=Mus musculus OX=10090 GN=Psmc3 PE=1 SV=2	34	12	12	12	442	49.5	5.19
Q9R020	Zranb2		Zinc finger Ran-binding domain-containing protein 2 OS=Mus musculus OX=10090 GN=Zranb2 PE=1 SV=2	6	2	2	2	330	37.3	9.89
Q80U78	Pum1		Pumilio homolog 1 OS=Mus musculus OX=10090 GN=Pum1 PE=1 SV=2	2	3	3	3	1189	126.5	6.86
O70251	Eef1b		Elongation factor 1-beta OS=Mus musculus OX=10090 GN=Eef1b PE=1 SV=5	60	10	13	9	225	24.7	4.69
Q8BJ37	Tdp1		Tyrosyl-DNA phosphodiesterase 1 OS=Mus musculus OX=10090 GN=Tdp1 PE=1 SV=2	2	1	1	1	609	68.6	7.81
P62748	Hpcal1		Hippocalcin-like protein 1 OS=Mus musculus OX=10090 GN=Hpcal1 PE=1 SV=2	5	1	1	1	193	22.3	5.5
Q3UFM5	Nom1		Nucleolar MIF4G domain-containing protein 1 OS=Mus musculus OX=10090 GN=Nom1 PE=1 SV=2	4	3	3	3	854	95.9	8.87
Q80XI4	Pip4k2b		Phosphatidylinositol 5-phosphate 4-kinase type-2 beta OS=Mus musculus OX=10090 GN=Pip4k2b PE=1 SV=1	3	1	1	1	416	47.3	7.33
P11103	Parp1		Poly [ADP-ribose] polymerase 1 OS=Mus musculus OX=10090 GN=Parp1 PE=1 SV=3	24	19	20	19	1013	113	8.95
Q01149	Col1a2		Collagen alpha-2(I) chain OS=Mus musculus OX=10090 GN=Col1a2 PE=1 SV=2	20	19	19	19	1372	129.5	9.19
Q8BKE6	Cyp20a1		Cytochrome P450 20A1 OS=Mus musculus OX=10090 GN=Cyp20a1 PE=1 SV=1	7	2	2	2	462	52.1	6.95
Q91X78	Erlin1		Erlin-1 OS=Mus musculus OX=10090 GN=Erlin1 PE=1 SV=2	14	5	5	2	348	39.2	7.21
O54988	Slk		STE20-like serine/threonine-protein kinase OS=Mus musculus OX=10090 GN=Slk PE=1 SV=2	1	1	1	1	1233	141.4	5.14
P58468	Slx9		Ribosome biogenesis protein SLX9 homolog OS=Mus musculus OX=10090 GN=Slx9 PE=1 SV=1	10	1	1	1	219	24.8	11
Q9D6Z1	Nop56		Nucleolar protein 56 OS=Mus musculus OX=10090 GN=Nop56 PE=1 SV=2	28	12	14	12	580	64.4	9.14
Q80YV3	Trrap		Transformation/transcription domain-associated protein OS=Mus musculus OX=10090 GN=Trrap PE=1 SV=2	2	4	4	4	2565	291.4	8.48
Q9CQM2	Kdelr2		ER lumen protein-retaining receptor 2 OS=Mus musculus OX=10090 GN=Kdelr2 PE=1 SV=1	12	2	2	2	212	24.4	8.72
Q8K1M6	Dnm1l		Dynamin-1-like protein OS=Mus musculus OX=10090 GN=Dnm1l PE=1 SV=2	1	1	1	1	742	82.6	7.05
Q99K85	Psat1		Phosphoserine aminotransferase OS=Mus musculus OX=10090 GN=Psat1 PE=1 SV=1	42	14	15	14	370	40.4	8.03
Q9CZX9	Emc4		ER membrane protein complex subunit 4 OS=Mus musculus OX=10090 GN=Emc4 PE=1 SV=1	7	1	1	1	183	20.1	8.62
Q9CPP0	Npm3		Nucleoplasmin-3 OS=Mus musculus OX=10090 GN=Npm3 PE=1 SV=3	42	4	5	4	175	19	4.82
Q61164	Ctcf		Transcriptional repressor CTCF OS=Mus musculus OX=10090 GN=Ctcf PE=1 SV=2	11	7	8	7	736	83.7	6.9
P16675	Ctsa		Lysosomal protective protein OS=Mus musculus OX=10090 GN=Ctsa PE=1 SV=1	4	2	2	2	474	53.8	5.86
P22437	Ptgs1		Prostaglandin G/H synthase 1 OS=Mus musculus OX=10090 GN=Ptgs1 PE=1 SV=1	4	2	2	1	602	69	6.83
Q9EQK5	Mvp		Major vault protein OS=Mus musculus OX=10090 GN=Mvp PE=1 SV=4	15	11	12	11	861	95.9	5.59
P62307	Snrpf		Small nuclear ribonucleoprotein F OS=Mus musculus OX=10090 GN=Snrpf PE=1 SV=1	15	2	4	2	86	9.7	4.67
Q9DBH5	Lman2		Vesicular integral-membrane protein VIP36 OS=Mus musculus OX=10090 GN=Lman2 PE=1 SV=2	6	2	2	2	358	40.4	6.95
Q99LI7	Cstf3		Cleavage stimulation factor subunit 3 OS=Mus musculus OX=10090 GN=Cstf3 PE=1 SV=1	18	9	10	9	717	82.8	8.12
Q91ZW3	Smarca5		SWI/SNF-related matrix-associated actin-dependent regulator of chromatin subfamily A member 5 OS=Mus musculus OX=10090 GN=Smarca5 PE=1 SV=1	16	18	19	18	1051	121.6	8.15
Q99NB9	Sf3b1		Splicing factor 3B subunit 1 OS=Mus musculus OX=10090 GN=Sf3b1 PE=1 SV=1	24	24	27	24	1304	145.7	7.09
Q60973	Rbbp7		Histone-binding protein RBBP7 OS=Mus musculus OX=10090 GN=Rbbp7 PE=1 SV=1	16	7	8	2	425	47.8	5.05
Q91YE7	Rbm5		RNA-binding protein 5 OS=Mus musculus OX=10090 GN=Rbm5 PE=1 SV=1	2	2	2	2	815	92.3	6.21
Q8R127	Sccpdh		Saccharopine dehydrogenase-like oxidoreductase OS=Mus musculus OX=10090 GN=Sccpdh PE=1 SV=1	2	1	1	1	429	47.1	8.6
P70195	Psmb7		Proteasome subunit beta type-7 OS=Mus musculus OX=10090 GN=Psmb7 PE=1 SV=1	8	2	2	2	277	29.9	7.99
P32020	Scp2		Sterol carrier protein 2 OS=Mus musculus OX=10090 GN=Scp2 PE=1 SV=3	6	4	4	4	547	59.1	7.44
Q9DB73	Cyb5r1		NADH-cytochrome b5 reductase 1 OS=Mus musculus OX=10090 GN=Cyb5r1 PE=1 SV=1	11	3	3	3	305	34.1	8.87
Q8BK63	Csnk1a1		Casein kinase I isoform alpha OS=Mus musculus OX=10090 GN=Csnk1a1 PE=1 SV=2	3	1	1	1	337	38.9	9.57
Q9CQX2	Cyb5b		Cytochrome b5 type B OS=Mus musculus OX=10090 GN=Cyb5b PE=1 SV=1	32	4	5	4	146	16.3	4.89
Q8BRM2	Gorab		RAB6-interacting golgin OS=Mus musculus OX=10090 GN=Gorab PE=1 SV=1	2	1	1	1	368	41.5	7.36
Q8R0A0	Gtf2f2		General transcription factor IIF subunit 2 OS=Mus musculus OX=10090 GN=Gtf2f2 PE=1 SV=1	3	1	1	1	249	28.4	9.22
O35887	Calu		Calumenin OS=Mus musculus OX=10090 GN=Calu PE=1 SV=1	50	11	13	11	315	37	4.67
P70280	Vamp7		Vesicle-associated membrane protein 7 OS=Mus musculus OX=10090 GN=Vamp7 PE=1 SV=1	4	1	1	1	220	25	8.6
P28301	Lox		Protein-lysine 6-oxidase OS=Mus musculus OX=10090 GN=Lox PE=1 SV=1	17	5	5	5	411	46.7	8.43
Q922J9	Far1		Fatty acyl-CoA reductase 1 OS=Mus musculus OX=10090 GN=Far1 PE=1 SV=1	12	6	6	6	515	59.4	9.19
Q6ZQI3	Mlec		Malectin OS=Mus musculus OX=10090 GN=Mlec PE=1 SV=2	16	4	4	4	291	32.3	6.05
Q920F6	Smc1b		Structural maintenance of chromosomes protein 1B OS=Mus musculus OX=10090 GN=Smc1b PE=1 SV=1	1	2	2	1	1248	144.4	7.12
Q8BJY1	Psmd5		26S proteasome non-ATPase regulatory subunit 5 OS=Mus musculus OX=10090 GN=Psmd5 PE=1 SV=4	10	4	4	4	504	55.9	5.21
P21278	Gna11		Guanine nucleotide-binding protein subunit alpha-11 OS=Mus musculus OX=10090 GN=Gna11 PE=1 SV=1	16	5	5	3	359	42	5.97
Q99L45	Eif2s2		Eukaryotic translation initiation factor 2 subunit 2 OS=Mus musculus OX=10090 GN=Eif2s2 PE=1 SV=1	22	8	8	8	331	38.1	5.8
P26516	Psmd7		26S proteasome non-ATPase regulatory subunit 7 OS=Mus musculus OX=10090 GN=Psmd7 PE=1 SV=2	22	6	7	6	321	36.5	6.77
Q8BFW7	Lpp		Lipoma-preferred partner homolog OS=Mus musculus OX=10090 GN=Lpp PE=1 SV=1	11	5	5	5	613	65.8	7.37
P61226	Rap2b		Ras-related protein Rap-2b OS=Mus musculus OX=10090 GN=Rap2b PE=1 SV=1	6	1	1	1	183	20.5	4.81
Q8BX90	Fndc3a		Fibronectin type-III domain-containing protein 3A OS=Mus musculus OX=10090 GN=Fndc3a PE=1 SV=3	1	2	2	2	1198	131.9	6.64
P28352	Apex1		DNA-(apurinic or apyrimidinic site) endonuclease OS=Mus musculus OX=10090 GN=Apex1 PE=1 SV=2	42	8	11	8	317	35.5	7.91
Q8K2A7	Ints10		Integrator complex subunit 10 OS=Mus musculus OX=10090 GN=Ints10 PE=1 SV=3	2	1	1	1	710	82	7.33
Q99K28	Arfgap2		ADP-ribosylation factor GTPase-activating protein 2 OS=Mus musculus OX=10090 GN=Arfgap2 PE=1 SV=1	4	2	2	2	520	56.6	8.18
Q91VJ5	Pqbp1		Polyglutamine-binding protein 1 OS=Mus musculus OX=10090 GN=Pqbp1 PE=1 SV=1	3	1	1	1	263	30.6	6.23
Q61749	Eif2b4		Translation initiation factor eIF-2B subunit delta OS=Mus musculus OX=10090 GN=Eif2b4 PE=1 SV=2	3	1	1	1	524	57.6	9.25
Q99JI4	Psmd6		26S proteasome non-ATPase regulatory subunit 6 OS=Mus musculus OX=10090 GN=Psmd6 PE=1 SV=1	11	4	4	4	389	45.5	5.52
Q8K1C9	Lrrc41		Leucine-rich repeat-containing protein 41 OS=Mus musculus OX=10090 GN=Lrrc41 PE=1 SV=3	2	1	1	1	807	88.1	8.31
O35295	Purb		Transcriptional activator protein Pur-beta OS=Mus musculus OX=10090 GN=Purb PE=1 SV=3	12	2	2	2	324	33.9	5.43
Q11011	Npepps		Puromycin-sensitive aminopeptidase OS=Mus musculus OX=10090 GN=Npepps PE=1 SV=2	11	8	8	8	920	103.3	5.9
Q61191	Hcfc1		Host cell factor 1 OS=Mus musculus OX=10090 GN=Hcfc1 PE=1 SV=2	4	7	7	7	2045	210.3	7.18
Q9Z1X4	Ilf3		Interleukin enhancer-binding factor 3 OS=Mus musculus OX=10090 GN=Ilf3 PE=1 SV=2	19	14	15	14	898	96	8.76
Q9QX47	Son		Protein SON OS=Mus musculus OX=10090 GN=Son PE=1 SV=2	1	2	2	2	2444	265.5	5.6
Q8BKT7	Thoc5		THO complex subunit 5 homolog OS=Mus musculus OX=10090 GN=Thoc5 PE=1 SV=2	4	3	3	3	683	78.6	7.12
Q6PR54	Rif1		Telomere-associated protein RIF1 OS=Mus musculus OX=10090 GN=Rif1 PE=1 SV=2	1	4	4	4	2419	266.1	5.57
Q99LS3	Psph		Phosphoserine phosphatase OS=Mus musculus OX=10090 GN=Psph PE=1 SV=1	4	1	1	1	225	25.1	6.14
Q9R0X4	Acot9		Acyl-coenzyme A thioesterase 9, mitochondrial OS=Mus musculus OX=10090 GN=Acot9 PE=1 SV=1	9	4	4	4	439	50.5	8.59
O35593	Psmd14		26S proteasome non-ATPase regulatory subunit 14 OS=Mus musculus OX=10090 GN=Psmd14 PE=1 SV=2	5	2	2	2	310	34.6	6.52
Q9D0M5	Dynll2		Dynein light chain 2, cytoplasmic OS=Mus musculus OX=10090 GN=Dynll2 PE=1 SV=1	25	1	1	1	89	10.3	7.37
O35737	Hnrnph1		Heterogeneous nuclear ribonucleoprotein H OS=Mus musculus OX=10090 GN=Hnrnph1 PE=1 SV=3	40	13	22	6	449	49.2	6.3
Q9DBF1	Aldh7a1		Alpha-aminoadipic semialdehyde dehydrogenase OS=Mus musculus OX=10090 GN=Aldh7a1 PE=1 SV=4	3	1	1	1	539	58.8	7.47
P97429	Anxa4		Annexin A4 OS=Mus musculus OX=10090 GN=Anxa4 PE=1 SV=4	46	14	15	13	319	35.9	5.57
Q99LC2	Cstf1		Cleavage stimulation factor subunit 1 OS=Mus musculus OX=10090 GN=Cstf1 PE=1 SV=1	21	6	6	6	431	48.4	6.58
P97493	Txn2		Thioredoxin, mitochondrial OS=Mus musculus OX=10090 GN=Txn2 PE=1 SV=1	9	1	1	1	166	18.2	7.9
Q9DBZ5	Eif3k		Eukaryotic translation initiation factor 3 subunit K OS=Mus musculus OX=10090 GN=Eif3k PE=1 SV=1	15	3	3	3	218	25.1	4.93
P27659	Rpl3		60S ribosomal protein L3 OS=Mus musculus OX=10090 GN=Rpl3 PE=1 SV=3	37	16	20	16	403	46.1	10.21
Q9EQP2	Ehd4		EH domain-containing protein 4 OS=Mus musculus OX=10090 GN=Ehd4 PE=1 SV=1	9	5	5	2	541	61.4	6.76
Q99JB8	Pacsin3		Protein kinase C and casein kinase II substrate protein 3 OS=Mus musculus OX=10090 GN=Pacsin3 PE=1 SV=1	3	1	1	1	424	48.6	6.1
Q8VEH5	Epm2aip1		EPM2A-interacting protein 1 OS=Mus musculus OX=10090 GN=Epm2aip1 PE=1 SV=1	2	1	1	1	606	70.1	5.87
Q8BH70	Fbxl4		F-box/LRR-repeat protein 4 OS=Mus musculus OX=10090 GN=Fbxl4 PE=1 SV=1	2	1	1	1	621	70.2	6.37
Q8JZU2	Slc25a1		Tricarboxylate transport protein, mitochondrial OS=Mus musculus OX=10090 GN=Slc25a1 PE=1 SV=1	14	4	4	4	311	33.9	9.89
Q9D1M7	Fkbp11		Peptidyl-prolyl cis-trans isomerase FKBP11 OS=Mus musculus OX=10090 GN=Fkbp11 PE=1 SV=1	14	3	4	3	201	22.1	9.36
Q9D0Q7	Mrpl45		39S ribosomal protein L45, mitochondrial OS=Mus musculus OX=10090 GN=Mrpl45 PE=1 SV=1	2	1	1	1	306	35.4	9.23
P60840	Ensa		Alpha-endosulfine OS=Mus musculus OX=10090 GN=Ensa PE=1 SV=1	9	1	1	1	121	13.3	7.24
Q62348	Tsn		Translin OS=Mus musculus OX=10090 GN=Tsn PE=1 SV=1	4	1	1	1	228	26.2	6.44
Q9R190	Mta2		Metastasis-associated protein MTA2 OS=Mus musculus OX=10090 GN=Mta2 PE=1 SV=1	14	9	9	9	668	75	9.67
Q8R0K4	Ccdc137		Coiled-coil domain-containing protein 137 OS=Mus musculus OX=10090 GN=Ccdc137 PE=2 SV=1	8	2	2	2	290	32.9	10.68
Q8BJW6	Eif2a		Eukaryotic translation initiation factor 2A OS=Mus musculus OX=10090 GN=Eif2a PE=1 SV=2	23	11	11	11	581	64.4	8.91
Q5SNZ0	Ccdc88a		Girdin OS=Mus musculus OX=10090 GN=Ccdc88a PE=1 SV=2	1	1	1	1	1873	215.8	6.24
Q8K297	Colgalt1		Procollagen galactosyltransferase 1 OS=Mus musculus OX=10090 GN=Colgalt1 PE=1 SV=2	13	7	7	7	617	71	7.28
Q9CPQ3	Tomm22		Mitochondrial import receptor subunit TOM22 homolog OS=Mus musculus OX=10090 GN=Tomm22 PE=1 SV=3	48	4	5	4	142	15.5	4.34
Q6PDM2	Srsf1		Serine/arginine-rich splicing factor 1 OS=Mus musculus OX=10090 GN=Srsf1 PE=1 SV=3	42	12	25	12	248	27.7	10.36
Q8BFV2	Pcid2		PCI domain-containing protein 2 OS=Mus musculus OX=10090 GN=Pcid2 PE=1 SV=1	2	1	1	1	399	46.1	8.53
Q61602	Gli3		Transcriptional activator GLI3 OS=Mus musculus OX=10090 GN=Gli3 PE=1 SV=2	1	1	1	1	1583	171.5	7.23
P08249	Mdh2		Malate dehydrogenase, mitochondrial OS=Mus musculus OX=10090 GN=Mdh2 PE=1 SV=3	44	11	12	11	338	35.6	8.68
P56391	Cox6b1		Cytochrome c oxidase subunit 6B1 OS=Mus musculus OX=10090 GN=Cox6b1 PE=1 SV=2	52	4	4	4	86	10.1	8.72
Q921H8	Acaa1a		3-ketoacyl-CoA thiolase A, peroxisomal OS=Mus musculus OX=10090 GN=Acaa1a PE=1 SV=1	4	1	1	1	424	43.9	8.44
O08848	RO60		RNA-binding protein Ro60 OS=Mus musculus OX=10090 GN=RO60 PE=1 SV=1	2	1	1	1	538	60.1	7.9
P01899	H2-D1		H-2 class I histocompatibility antigen, D-B alpha chain OS=Mus musculus OX=10090 GN=H2-D1 PE=1 SV=2	18	5	6	5	362	40.8	6.73
Q9CXL3			Uncharacterized protein C7orf50 homolog OS=Mus musculus OX=10090 PE=1 SV=3	8	1	1	1	195	22.2	9.39
P15920	Atp6v0a2		V-type proton ATPase 116 kDa subunit a 2 OS=Mus musculus OX=10090 GN=Atp6v0a2 PE=1 SV=2	1	1	1	1	856	98.1	6.64
Q9D024	Ccdc47		PAT complex subunit CCDC47 OS=Mus musculus OX=10090 GN=Ccdc47 PE=1 SV=2	14	5	5	5	483	55.8	4.84
Q8BQZ5	Cpsf4		Cleavage and polyadenylation specificity factor subunit 4 OS=Mus musculus OX=10090 GN=Cpsf4 PE=2 SV=1	11	2	2	2	211	23.6	8.47
P70318	Tial1		Nucleolysin TIAR OS=Mus musculus OX=10090 GN=Tial1 PE=1 SV=1	11	4	4	4	392	43.4	7.99
P54227	Stmn1		Stathmin OS=Mus musculus OX=10090 GN=Stmn1 PE=1 SV=2	17	3	3	3	149	17.3	5.97
Q9CYL5	Glipr2		Golgi-associated plant pathogenesis-related protein 1 OS=Mus musculus OX=10090 GN=Glipr2 PE=1 SV=3	8	1	1	1	154	17.1	9.51
P47930	Fosl2		Fos-related antigen 2 OS=Mus musculus OX=10090 GN=Fosl2 PE=1 SV=2	11	3	3	3	326	35.3	7.49
Q3V3R1	Mthfd1l		Monofunctional C1-tetrahydrofolate synthase, mitochondrial OS=Mus musculus OX=10090 GN=Mthfd1l PE=1 SV=2	14	11	11	11	977	105.7	7.02
Q9CZ44	Nsfl1c		NSFL1 cofactor p47 OS=Mus musculus OX=10090 GN=Nsfl1c PE=1 SV=1	14	4	4	4	370	40.7	5.15
P05213	Tuba1b		Tubulin alpha-1B chain OS=Mus musculus OX=10090 GN=Tuba1b PE=1 SV=2	55	17	28	2	451	50.1	5.06
Q99PL5	Rrbp1		Ribosome-binding protein 1 OS=Mus musculus OX=10090 GN=Rrbp1 PE=1 SV=2	32	42	49	42	1605	172.8	9.33
Q9JIK9	Mrps34		28S ribosomal protein S34, mitochondrial OS=Mus musculus OX=10090 GN=Mrps34 PE=1 SV=1	7	2	2	2	218	25.8	10.43
O70405	Ulk1		Serine/threonine-protein kinase ULK1 OS=Mus musculus OX=10090 GN=Ulk1 PE=1 SV=1	1	1	1	1	1051	112.4	8.66
Q8CFE3	Rcor1		REST corepressor 1 OS=Mus musculus OX=10090 GN=Rcor1 PE=1 SV=3	3	1	1	1	480	52.7	7.03
Q76MZ3	Ppp2r1a		Serine/threonine-protein phosphatase 2A 65 kDa regulatory subunit A alpha isoform OS=Mus musculus OX=10090 GN=Ppp2r1a PE=1 SV=3	41	21	23	21	589	65.3	5.11
Q02013	Aqp1		Aquaporin-1 OS=Mus musculus OX=10090 GN=Aqp1 PE=1 SV=3	7	1	1	1	269	28.8	7.43
Q99KJ8	Dctn2		Dynactin subunit 2 OS=Mus musculus OX=10090 GN=Dctn2 PE=1 SV=3	26	9	10	9	402	44.1	5.26
Q9EPK7	Xpo7		Exportin-7 OS=Mus musculus OX=10090 GN=Xpo7 PE=1 SV=3	1	1	1	1	1087	123.7	6.38
Q3UEB3	Puf60		Poly(U)-binding-splicing factor PUF60 OS=Mus musculus OX=10090 GN=Puf60 PE=1 SV=2	43	19	22	19	564	60.2	5.29
Q9Z0X1	Aifm1		Apoptosis-inducing factor 1, mitochondrial OS=Mus musculus OX=10090 GN=Aifm1 PE=1 SV=1	6	3	3	3	612	66.7	9.17
Q78WZ7	Polr1f		DNA-directed RNA polymerase I subunit RPA43 OS=Mus musculus OX=10090 GN=Polr1f PE=1 SV=1	2	1	1	1	330	36.7	6.21
P35922	Fmr1		Fragile X messenger ribonucleoprotein 1 OS=Mus musculus OX=10090 GN=Fmr1 PE=1 SV=1	6	3	3	2	614	68.9	7.62
P53564	Cux1		Homeobox protein cut-like 1 OS=Mus musculus OX=10090 GN=Cux1 PE=1 SV=3	4	5	5	5	1515	165.5	6.32
Q6A026	Pds5a		Sister chromatid cohesion protein PDS5 homolog A OS=Mus musculus OX=10090 GN=Pds5a PE=1 SV=3	11	14	15	8	1332	150.2	7.85
E9PVX6	Mki67		Proliferation marker protein Ki-67 OS=Mus musculus OX=10090 GN=Mki67 PE=1 SV=1	15	32	33	32	3177	350.7	9.72
Q640N1	Aebp1		Adipocyte enhancer-binding protein 1 OS=Mus musculus OX=10090 GN=Aebp1 PE=1 SV=1	3	3	3	3	1128	128.3	5.08
Q921F2	Tardbp		TAR DNA-binding protein 43 OS=Mus musculus OX=10090 GN=Tardbp PE=1 SV=1	31	11	16	11	414	44.5	6.7
Q61207	Psap		Prosaposin OS=Mus musculus OX=10090 GN=Psap PE=1 SV=2	17	8	9	8	557	61.4	5.19
Q8CCI5	Rybp		RING1 and YY1-binding protein OS=Mus musculus OX=10090 GN=Rybp PE=1 SV=1	3	1	1	1	228	24.8	9.63
P35564	Canx		Calnexin OS=Mus musculus OX=10090 GN=Canx PE=1 SV=1	33	18	22	18	591	67.2	4.64
P40124	Cap1		Adenylyl cyclase-associated protein 1 OS=Mus musculus OX=10090 GN=Cap1 PE=1 SV=4	37	13	16	13	474	51.5	7.52
O88736	Hsd17b7		3-keto-steroid reductase/17-beta-hydroxysteroid dehydrogenase 7 OS=Mus musculus OX=10090 GN=Hsd17b7 PE=1 SV=1	8	2	2	2	334	37.3	6.73
Q91ZX7	Lrp1		Prolow-density lipoprotein receptor-related protein 1 OS=Mus musculus OX=10090 GN=Lrp1 PE=1 SV=1	4	19	19	19	4545	504.4	5.36
Q6P8I4	Pcnp		PEST proteolytic signal-containing nuclear protein OS=Mus musculus OX=10090 GN=Pcnp PE=1 SV=1	5	1	1	1	178	19	7.49
Q8CI59	Steap3		Metalloreductase STEAP3 OS=Mus musculus OX=10090 GN=Steap3 PE=1 SV=1	18	7	7	7	488	54.7	9.22
Q60520	Sin3a		Paired amphipathic helix protein Sin3a OS=Mus musculus OX=10090 GN=Sin3a PE=1 SV=3	3	3	3	3	1274	145	7.25
Q8R4R6	Nup35		Nucleoporin NUP35 OS=Mus musculus OX=10090 GN=Nup35 PE=1 SV=2	4	1	1	1	325	34.8	9.25
P40630	Tfam		Transcription factor A, mitochondrial OS=Mus musculus OX=10090 GN=Tfam PE=1 SV=2	20	5	5	5	243	28	9.69
P53996	Cnbp		CCHC-type zinc finger nucleic acid binding protein OS=Mus musculus OX=10090 GN=Cnbp PE=1 SV=2	24	4	5	4	178	19.6	7.58
Q3UM45	Ppp1r7		Protein phosphatase 1 regulatory subunit 7 OS=Mus musculus OX=10090 GN=Ppp1r7 PE=1 SV=2	8	3	3	3	361	41.3	4.92
Q8R2M2	Dnttip2		Deoxynucleotidyltransferase terminal-interacting protein 2 OS=Mus musculus OX=10090 GN=Dnttip2 PE=1 SV=1	1	1	1	1	758	84.2	6.44
Q8R404	Micos13		MICOS complex subunit MIC13 OS=Mus musculus OX=10090 GN=Micos13 PE=1 SV=1	6	1	1	1	119	13.4	8.63
Q8VCH8	Ubxn4		UBX domain-containing protein 4 OS=Mus musculus OX=10090 GN=Ubxn4 PE=1 SV=1	3	1	1	1	506	56.4	6.61
P17427	Ap2a2		AP-2 complex subunit alpha-2 OS=Mus musculus OX=10090 GN=Ap2a2 PE=1 SV=2	34	24	27	15	938	104	6.93
Q791T5	Mtch1		Mitochondrial carrier homolog 1 OS=Mus musculus OX=10090 GN=Mtch1 PE=1 SV=1	5	2	2	2	389	41.5	9.32
Q2KN98	Specc1l		Cytospin-A OS=Mus musculus OX=10090 GN=Specc1l PE=1 SV=1	3	2	2	2	1118	124.4	5.76
P97376	Frg1		Protein FRG1 OS=Mus musculus OX=10090 GN=Frg1 PE=1 SV=2	17	4	4	4	258	29.1	8.92
Q9D6U8	Fam162a		Protein FAM162A OS=Mus musculus OX=10090 GN=Fam162a PE=1 SV=1	23	4	4	4	155	17.7	9.88
Q8CIB5	Fermt2		Fermitin family homolog 2 OS=Mus musculus OX=10090 GN=Fermt2 PE=1 SV=1	1	1	1	1	680	77.8	6.7
P63013	Prrx1		Paired mesoderm homeobox protein 1 OS=Mus musculus OX=10090 GN=Prrx1 PE=1 SV=1	22	5	6	5	245	27.3	9.47
Q8C0E2	Vps26b		Vacuolar protein sorting-associated protein 26B OS=Mus musculus OX=10090 GN=Vps26b PE=1 SV=1	3	1	1	1	336	39.1	7.37
Q8R3P6	Ints14		Integrator complex subunit 14 OS=Mus musculus OX=10090 GN=Ints14 PE=1 SV=1	2	1	1	1	515	57.2	5.17
Q80W68	Kirrel1		Kin of IRRE-like protein 1 OS=Mus musculus OX=10090 GN=Kirrel1 PE=1 SV=1	2	1	1	1	789	87.1	5.92
Q3TLH4	Prrc2c		Protein PRRC2C OS=Mus musculus OX=10090 GN=Prrc2c PE=1 SV=3	1	5	5	5	2846	310.7	9.1
Q9R1C7	Prpf40a		Pre-mRNA-processing factor 40 homolog A OS=Mus musculus OX=10090 GN=Prpf40a PE=1 SV=1	13	11	11	11	953	108.4	7.69
Q60692	Psmb6		Proteasome subunit beta type-6 OS=Mus musculus OX=10090 GN=Psmb6 PE=1 SV=3	13	3	4	3	238	25.4	5.11
P62141	Ppp1cb		Serine/threonine-protein phosphatase PP1-beta catalytic subunit OS=Mus musculus OX=10090 GN=Ppp1cb PE=1 SV=3	28	7	9	2	327	37.2	6.19
Q3UMU9	Hdgfl2		Hepatoma-derived growth factor-related protein 2 OS=Mus musculus OX=10090 GN=Hdgfl2 PE=1 SV=1	10	6	7	5	669	74.2	8.66
P60670	Nploc4		Nuclear protein localization protein 4 homolog OS=Mus musculus OX=10090 GN=Nploc4 PE=1 SV=3	2	1	1	1	608	68	6.46
O54825	Bysl		Bystin OS=Mus musculus OX=10090 GN=Bysl PE=1 SV=3	2	1	1	1	436	49.8	7.78
P18826	Phka1		Phosphorylase b kinase regulatory subunit alpha, skeletal muscle isoform OS=Mus musculus OX=10090 GN=Phka1 PE=1 SV=3	1	1	1	1	1241	138.7	5.86
Q9CZH7	Mxra7		Matrix-remodeling-associated protein 7 OS=Mus musculus OX=10090 GN=Mxra7 PE=1 SV=2	4	1	1	1	178	19.4	4.26
P38647	Hspa9		Stress-70 protein, mitochondrial OS=Mus musculus OX=10090 GN=Hspa9 PE=1 SV=3	47	27	31	27	679	73.4	6.07
E9Q137	Tex264		Testis-expressed protein 264 homolog OS=Mus musculus OX=10090 GN=Tex264 PE=2 SV=1	5	1	1	1	309	33.6	5.4
Q8CG48	Smc2		Structural maintenance of chromosomes protein 2 OS=Mus musculus OX=10090 GN=Smc2 PE=1 SV=2	4	5	5	5	1191	134.2	8.41
Q9Z2D6	Mecp2		Methyl-CpG-binding protein 2 OS=Mus musculus OX=10090 GN=Mecp2 PE=1 SV=1	3	1	1	1	484	52.3	9.96
P30285	Cdk4		Cyclin-dependent kinase 4 OS=Mus musculus OX=10090 GN=Cdk4 PE=1 SV=1	9	2	2	2	303	33.7	6.62
P97311	Mcm6		DNA replication licensing factor MCM6 OS=Mus musculus OX=10090 GN=Mcm6 PE=1 SV=1	16	11	11	11	821	92.8	5.45
P05533	Ly6a		Lymphocyte antigen 6A-2/6E-1 OS=Mus musculus OX=10090 GN=Ly6a PE=1 SV=1	16	1	1	1	134	14.4	4.83
P55096	Abcd3		ATP-binding cassette sub-family D member 3 OS=Mus musculus OX=10090 GN=Abcd3 PE=1 SV=2	9	5	5	5	659	75.4	9.26
Q71KT5	Tm7sf2		Delta(14)-sterol reductase TM7SF2 OS=Mus musculus OX=10090 GN=Tm7sf2 PE=1 SV=2	2	1	1	1	418	46.5	8.28
Q922K7	Nop2		Probable 28S rRNA (cytosine-C(5))-methyltransferase OS=Mus musculus OX=10090 GN=Nop2 PE=1 SV=1	17	11	11	11	793	86.7	9.22
Q7TMY8	Huwe1		E3 ubiquitin-protein ligase HUWE1 OS=Mus musculus OX=10090 GN=Huwe1 PE=1 SV=5	0	2	2	2	4377	482.3	5.22
Q9DCT6	Bap18		Chromatin complexes subunit BAP18 OS=Mus musculus OX=10090 GN=Bap18 PE=1 SV=1	8	1	1	1	171	18	7.33
O35841	Api5		Apoptosis inhibitor 5 OS=Mus musculus OX=10090 GN=Api5 PE=1 SV=2	18	7	8	7	504	56.8	5.92
P61021	Rab5b		Ras-related protein Rab-5B OS=Mus musculus OX=10090 GN=Rab5b PE=1 SV=1	22	4	4	2	215	23.7	8.13
Q9DB05	Napa		Alpha-soluble NSF attachment protein OS=Mus musculus OX=10090 GN=Napa PE=1 SV=1	14	3	3	3	295	33.2	5.45
Q69Z99	Znf512		Zinc finger protein 512 OS=Mus musculus OX=10090 GN=Znf512 PE=2 SV=2	5	2	2	2	562	63.9	9.51
Q8VHN8	Nudt16l1		Tudor-interacting repair regulator protein OS=Mus musculus OX=10090 GN=Nudt16l1 PE=1 SV=2	5	1	1	1	211	23.4	9.26
Q5PSV9	Mdc1		Mediator of DNA damage checkpoint protein 1 OS=Mus musculus OX=10090 GN=Mdc1 PE=1 SV=1	3	5	5	5	1707	184.6	5.19
Q9ER72	Cars1		Cysteine--tRNA ligase, cytoplasmic OS=Mus musculus OX=10090 GN=Cars1 PE=1 SV=2	12	9	9	9	831	94.8	6.76
Q80X71	Tmem106b		Transmembrane protein 106B OS=Mus musculus OX=10090 GN=Tmem106b PE=1 SV=1	4	1	1	1	275	31.2	6.68
O70551	Srpk1		SRSF protein kinase 1 OS=Mus musculus OX=10090 GN=Srpk1 PE=1 SV=2	13	7	7	7	648	73	6.19
Q80W00	Ppp1r10		Serine/threonine-protein phosphatase 1 regulatory subunit 10 OS=Mus musculus OX=10090 GN=Ppp1r10 PE=1 SV=1	4	3	3	3	888	94.3	9.16
Q9D937			Uncharacterized protein C11orf98 homolog OS=Mus musculus OX=10090 PE=1 SV=1	37	4	5	4	123	14.1	11.47
Q3UFB2	Znhit6		Box C/D snoRNA protein 1 OS=Mus musculus OX=10090 GN=Znhit6 PE=1 SV=2	2	1	1	1	460	52.2	5.57
Q8C6B9	Rps19bp1		Active regulator of SIRT1 OS=Mus musculus OX=10090 GN=Rps19bp1 PE=1 SV=1	31	3	3	3	143	16	10.83
Q9R0U0	Srsf10		Serine/arginine-rich splicing factor 10 OS=Mus musculus OX=10090 GN=Srsf10 PE=1 SV=2	17	4	5	4	262	31.3	11.27
Q7JJ13	Brd2		Bromodomain-containing protein 2 OS=Mus musculus OX=10090 GN=Brd2 PE=1 SV=1	3	2	2	1	798	88	9.13
Q9WV68	Decr2		Peroxisomal 2,4-dienoyl-CoA reductase [(3E)-enoyl-CoA-producing] OS=Mus musculus OX=10090 GN=Decr2 PE=1 SV=1	3	1	1	1	292	31.3	8.81
Q8BH15	Cnot10		CCR4-NOT transcription complex subunit 10 OS=Mus musculus OX=10090 GN=Cnot10 PE=1 SV=1	4	2	2	2	744	81.8	7.68
Q9QZE5	Copg1		Coatomer subunit gamma-1 OS=Mus musculus OX=10090 GN=Copg1 PE=1 SV=1	10	6	6	6	874	97.5	5.35
Q6PGH2	Jpt2		Jupiter microtubule associated homolog 2 OS=Mus musculus OX=10090 GN=Jpt2 PE=1 SV=1	14	2	2	2	190	20	8.62
Q9JHW2	Nit2		Omega-amidase NIT2 OS=Mus musculus OX=10090 GN=Nit2 PE=1 SV=1	5	1	1	1	276	30.5	6.9
Q99LC3	Ndufa10		NADH dehydrogenase [ubiquinone] 1 alpha subcomplex subunit 10, mitochondrial OS=Mus musculus OX=10090 GN=Ndufa10 PE=1 SV=1	6	2	2	2	355	40.6	7.78
E9Q5C9	Nolc1		Nucleolar and coiled-body phosphoprotein 1 OS=Mus musculus OX=10090 GN=Nolc1 PE=1 SV=1	19	13	15	13	702	73.7	9.36
Q8CH18	Ccar1		Cell division cycle and apoptosis regulator protein 1 OS=Mus musculus OX=10090 GN=Ccar1 PE=1 SV=1	6	7	7	7	1146	132	5.76
P59222	Scarf2		Scavenger receptor class F member 2 OS=Mus musculus OX=10090 GN=Scarf2 PE=1 SV=1	3	2	2	2	833	87.8	8.22
Q9QZQ1	Afdn		Afadin OS=Mus musculus OX=10090 GN=Afdn PE=1 SV=3	3	5	5	5	1820	206.4	6.32
P54276	Msh6		DNA mismatch repair protein Msh6 OS=Mus musculus OX=10090 GN=Msh6 PE=1 SV=3	7	9	9	9	1358	151	6.73
Q99K01	Pdxdc1		Pyridoxal-dependent decarboxylase domain-containing protein 1 OS=Mus musculus OX=10090 GN=Pdxdc1 PE=1 SV=2	1	1	1	1	787	87.3	5.48
Q9R0P6	Sec11a		Signal peptidase complex catalytic subunit SEC11A OS=Mus musculus OX=10090 GN=Sec11a PE=1 SV=1	9	2	2	2	179	20.6	9.33
Q9Z127	Slc7a5		Large neutral amino acids transporter small subunit 1 OS=Mus musculus OX=10090 GN=Slc7a5 PE=1 SV=2	3	1	1	1	512	55.8	7.9
P14685	Psmd3		26S proteasome non-ATPase regulatory subunit 3 OS=Mus musculus OX=10090 GN=Psmd3 PE=1 SV=3	12	5	5	5	530	60.7	8.44
Q99KI0	Aco2		Aconitate hydratase, mitochondrial OS=Mus musculus OX=10090 GN=Aco2 PE=1 SV=1	27	17	20	17	780	85.4	7.93
Q9QXY6	Ehd3		EH domain-containing protein 3 OS=Mus musculus OX=10090 GN=Ehd3 PE=1 SV=2	10	5	5	1	535	60.8	6.46
Q0VGY8	Tanc1		Protein TANC1 OS=Mus musculus OX=10090 GN=Tanc1 PE=1 SV=2	1	1	1	1	1856	200.7	8.35
Q921N6	Ddx27		Probable ATP-dependent RNA helicase DDX27 OS=Mus musculus OX=10090 GN=Ddx27 PE=1 SV=3	7	5	5	5	760	85.9	9.25
Q80UY1	Carnmt1		Carnosine N-methyltransferase OS=Mus musculus OX=10090 GN=Carnmt1 PE=1 SV=1	3	1	1	1	400	46.3	6.16
P41731	Cd63		CD63 antigen OS=Mus musculus OX=10090 GN=Cd63 PE=1 SV=2	8	2	2	2	238	25.7	6.98
Q61183	Papola		Poly(A) polymerase alpha OS=Mus musculus OX=10090 GN=Papola PE=1 SV=4	2	1	1	1	739	82.3	7.34
O70433	Fhl2		Four and a half LIM domains protein 2 OS=Mus musculus OX=10090 GN=Fhl2 PE=1 SV=1	10	2	2	2	279	32.1	7.3
P13864	Dnmt1		DNA (cytosine-5)-methyltransferase 1 OS=Mus musculus OX=10090 GN=Dnmt1 PE=1 SV=5	13	20	20	20	1620	183.1	7.74
Q6IRU5	Cltb		Clathrin light chain B OS=Mus musculus OX=10090 GN=Cltb PE=1 SV=1	4	1	1	1	229	25.2	4.63
Q8BYB9	Poglut1		Protein O-glucosyltransferase 1 OS=Mus musculus OX=10090 GN=Poglut1 PE=1 SV=2	4	1	1	1	392	46.4	8.85
Q91YE6	Ipo9		Importin-9 OS=Mus musculus OX=10090 GN=Ipo9 PE=1 SV=3	4	2	2	2	1041	116	4.81
Q8VBT0	Tmx1		Thioredoxin-related transmembrane protein 1 OS=Mus musculus OX=10090 GN=Tmx1 PE=1 SV=1	5	1	1	1	278	31.4	5.29
Q9JIK5	Ddx21		Nucleolar RNA helicase 2 OS=Mus musculus OX=10090 GN=Ddx21 PE=1 SV=3	29	22	26	22	851	93.5	9.11
P99026	Psmb4		Proteasome subunit beta type-4 OS=Mus musculus OX=10090 GN=Psmb4 PE=1 SV=1	20	4	4	4	264	29.1	5.64
Q9CY27	Tecr		Very-long-chain enoyl-CoA reductase OS=Mus musculus OX=10090 GN=Tecr PE=1 SV=1	21	6	6	6	308	36.1	9.55
O08791	Ebf3		Transcription factor COE3 OS=Mus musculus OX=10090 GN=Ebf3 PE=1 SV=1	3	2	2	2	596	64.8	8.66
Q8C7V3	Utp15		U3 small nucleolar RNA-associated protein 15 homolog OS=Mus musculus OX=10090 GN=Utp15 PE=1 SV=1	1	1	1	1	528	59.3	8.79
P26645	Marcks		Myristoylated alanine-rich C-kinase substrate OS=Mus musculus OX=10090 GN=Marcks PE=1 SV=2	6	1	2	1	309	29.6	4.34
P18242	Ctsd		Cathepsin D OS=Mus musculus OX=10090 GN=Ctsd PE=1 SV=1	26	8	8	8	410	44.9	7.15
Q6ZQ58	Larp1		La-related protein 1 OS=Mus musculus OX=10090 GN=Larp1 PE=1 SV=3	7	6	6	6	1072	121.1	8.79
Q8BMK4	Ckap4		Cytoskeleton-associated protein 4 OS=Mus musculus OX=10090 GN=Ckap4 PE=1 SV=2	51	25	37	25	575	63.7	5.64
Q69ZK6	Jmjd1c		Probable JmjC domain-containing histone demethylation protein 2C OS=Mus musculus OX=10090 GN=Jmjd1c PE=1 SV=3	1	1	1	1	2350	260.5	8.07
P10630	Eif4a2		Eukaryotic initiation factor 4A-II OS=Mus musculus OX=10090 GN=Eif4a2 PE=1 SV=2	30	12	15	3	407	46.4	5.48
Q810D6	Grwd1		Glutamate-rich WD repeat-containing protein 1 OS=Mus musculus OX=10090 GN=Grwd1 PE=1 SV=2	5	2	2	2	446	49.2	4.81
Q9D3P8	Plgrkt		Plasminogen receptor (KT) OS=Mus musculus OX=10090 GN=Plgrkt PE=1 SV=1	7	1	1	1	147	17.3	9.5
O35379	Abcc1		Multidrug resistance-associated protein 1 OS=Mus musculus OX=10090 GN=Abcc1 PE=1 SV=1	1	1	1	1	1528	171.1	7.36
A2BE28	Las1l		Ribosomal biogenesis protein LAS1L OS=Mus musculus OX=10090 GN=Las1l PE=1 SV=1	5	3	3	3	776	89.4	4.44
P06797	Ctsl		Procathepsin L OS=Mus musculus OX=10090 GN=Ctsl PE=1 SV=2	10	2	2	2	334	37.5	6.83
Q8CEE7	Rdh13		Retinol dehydrogenase 13 OS=Mus musculus OX=10090 GN=Rdh13 PE=1 SV=1	4	1	1	1	334	36.4	8.85
Q6TEK5	Vkorc1l1		Vitamin K epoxide reductase complex subunit 1-like protein 1 OS=Mus musculus OX=10090 GN=Vkorc1l1 PE=1 SV=1	6	1	1	1	176	19.8	8.95
Q99K74	Med24		Mediator of RNA polymerase II transcription subunit 24 OS=Mus musculus OX=10090 GN=Med24 PE=1 SV=1	1	1	1	1	987	109.9	6.83
Q8K2B0	P3h4		Endoplasmic reticulum protein SC65 OS=Mus musculus OX=10090 GN=P3h4 PE=1 SV=1	2	1	1	1	443	51.1	4.81
Q61206	Pafah1b2		Platelet-activating factor acetylhydrolase IB subunit alpha2 OS=Mus musculus OX=10090 GN=Pafah1b2 PE=1 SV=2	12	2	2	2	229	25.6	5.92
Q8JZN5	Acad9		Complex I assembly factor ACAD9, mitochondrial OS=Mus musculus OX=10090 GN=Acad9 PE=1 SV=2	8	4	5	4	625	68.7	7.46
P37040	Por		NADPH--cytochrome P450 reductase OS=Mus musculus OX=10090 GN=Por PE=1 SV=2	11	6	6	6	678	77	5.53
Q9D6J6	Ndufv2		NADH dehydrogenase [ubiquinone] flavoprotein 2, mitochondrial OS=Mus musculus OX=10090 GN=Ndufv2 PE=1 SV=2	4	1	1	1	248	27.3	7.4
Q4VA53	Pds5b		Sister chromatid cohesion protein PDS5 homolog B OS=Mus musculus OX=10090 GN=Pds5b PE=1 SV=1	22	27	29	21	1446	164.3	8.5
P13020	Gsn		Gelsolin OS=Mus musculus OX=10090 GN=Gsn PE=1 SV=3	28	17	23	17	780	85.9	6.18
Q8BYL4	Yars2		Tyrosine--tRNA ligase, mitochondrial OS=Mus musculus OX=10090 GN=Yars2 PE=1 SV=2	2	1	1	1	472	52.6	9.16
Q9D0D3	Mtpap		Poly(A) RNA polymerase, mitochondrial OS=Mus musculus OX=10090 GN=Mtpap PE=1 SV=1	2	1	1	1	585	65.2	8.88
Q3TXS7	Psmd1		26S proteasome non-ATPase regulatory subunit 1 OS=Mus musculus OX=10090 GN=Psmd1 PE=1 SV=1	12	9	10	9	953	105.7	5.39
Q8BKC5	Ipo5		Importin-5 OS=Mus musculus OX=10090 GN=Ipo5 PE=1 SV=3	13	11	12	11	1097	123.5	4.93
Q9CW46	Raver1		Ribonucleoprotein PTB-binding 1 OS=Mus musculus OX=10090 GN=Raver1 PE=1 SV=2	11	6	7	6	748	79.3	8.72
Q61881	Mcm7		DNA replication licensing factor MCM7 OS=Mus musculus OX=10090 GN=Mcm7 PE=1 SV=1	18	10	10	10	719	81.2	6.37
P70168	Kpnb1		Importin subunit beta-1 OS=Mus musculus OX=10090 GN=Kpnb1 PE=1 SV=2	27	19	21	19	876	97.1	4.78
Q5EG47	Prkaa1		5'-AMP-activated protein kinase catalytic subunit alpha-1 OS=Mus musculus OX=10090 GN=Prkaa1 PE=1 SV=2	1	1	1	1	559	63.9	8.12
Q8BP48	Metap1		Methionine aminopeptidase 1 OS=Mus musculus OX=10090 GN=Metap1 PE=1 SV=1	15	4	5	4	386	43.2	7.17
O08529	Capn2		Calpain-2 catalytic subunit OS=Mus musculus OX=10090 GN=Capn2 PE=1 SV=4	5	3	3	3	700	79.8	4.96
Q9EQU5	Set		Protein SET OS=Mus musculus OX=10090 GN=Set PE=1 SV=1	31	6	7	6	289	33.4	4.32
Q60854	Serpinb6		Serpin B6 OS=Mus musculus OX=10090 GN=Serpinb6 PE=1 SV=1	2	1	1	1	378	42.6	5.74
Q9QWV9	Ccnt1		Cyclin-T1 OS=Mus musculus OX=10090 GN=Ccnt1 PE=1 SV=3	6	3	3	3	724	80.5	8.68
A2AT37	Upf2		Regulator of nonsense transcripts 2 OS=Mus musculus OX=10090 GN=Upf2 PE=1 SV=1	1	1	1	1	1269	147.5	5.64
Q9DBF7	Cwc25		Pre-mRNA-splicing factor CWC25 homolog OS=Mus musculus OX=10090 GN=Cwc25 PE=2 SV=2	3	1	1	1	416	48.8	10.23
P63001	Rac1		Ras-related C3 botulinum toxin substrate 1 OS=Mus musculus OX=10090 GN=Rac1 PE=1 SV=1	31	6	7	5	192	21.4	8.5
O70503	Hsd17b12		Very-long-chain 3-oxoacyl-CoA reductase OS=Mus musculus OX=10090 GN=Hsd17b12 PE=1 SV=1	29	7	7	7	312	34.7	9.52
Q6NZF1	Zc3h11a		Zinc finger CCCH domain-containing protein 11A OS=Mus musculus OX=10090 GN=Zc3h11a PE=1 SV=1	4	2	2	2	792	86.4	8.13
Q8K194	Snrnp27		U4/U6.U5 small nuclear ribonucleoprotein 27 kDa protein OS=Mus musculus OX=10090 GN=Snrnp27 PE=1 SV=1	7	1	1	1	155	18.9	11.62
P45376	Akr1b1		Aldo-keto reductase family 1 member B1 OS=Mus musculus OX=10090 GN=Akr1b1 PE=1 SV=3	41	14	15	13	316	35.7	7.18
Q3TJD7	Pdlim7		PDZ and LIM domain protein 7 OS=Mus musculus OX=10090 GN=Pdlim7 PE=1 SV=1	17	6	6	6	457	50.1	8.47
P10639	Txn		Thioredoxin OS=Mus musculus OX=10090 GN=Txn PE=1 SV=3	55	5	8	5	105	11.7	4.92
Q9CU62	Smc1a		Structural maintenance of chromosomes protein 1A OS=Mus musculus OX=10090 GN=Smc1a PE=1 SV=4	17	20	20	19	1233	143.1	7.64
O88487	Dync1i2		Cytoplasmic dynein 1 intermediate chain 2 OS=Mus musculus OX=10090 GN=Dync1i2 PE=1 SV=1	9	3	3	3	612	68.4	5.29
P47754	Capza2		F-actin-capping protein subunit alpha-2 OS=Mus musculus OX=10090 GN=Capza2 PE=1 SV=3	28	5	6	3	286	32.9	5.85
Q8VDM4	Psmd2		26S proteasome non-ATPase regulatory subunit 2 OS=Mus musculus OX=10090 GN=Psmd2 PE=1 SV=1	27	19	21	19	908	100.1	5.17
E9Q912	Rap1gds1		Rap1 GTPase-GDP dissociation stimulator 1 OS=Mus musculus OX=10090 GN=Rap1gds1 PE=2 SV=1	2	1	1	1	607	66	5.35
P20444	Prkca		Protein kinase C alpha type OS=Mus musculus OX=10090 GN=Prkca PE=1 SV=3	7	4	5	4	672	76.8	7.14
Q61656	Ddx5		Probable ATP-dependent RNA helicase DDX5 OS=Mus musculus OX=10090 GN=Ddx5 PE=1 SV=2	52	31	39	23	614	69.2	8.92
Q9D0E1	Hnrnpm		Heterogeneous nuclear ribonucleoprotein M OS=Mus musculus OX=10090 GN=Hnrnpm PE=1 SV=3	59	43	55	43	729	77.6	8.63
P70698	Ctps1		CTP synthase 1 OS=Mus musculus OX=10090 GN=Ctps1 PE=1 SV=2	28	13	13	13	591	66.6	6.58
Q6ZQF0	Topbp1		DNA topoisomerase 2-binding protein 1 OS=Mus musculus OX=10090 GN=Topbp1 PE=1 SV=2	1	1	1	1	1515	168.8	6.67
Q91V12	Acot7		Cytosolic acyl coenzyme A thioester hydrolase OS=Mus musculus OX=10090 GN=Acot7 PE=1 SV=2	13	4	4	4	381	42.5	8.68
Q9D1G2	Pmvk		Phosphomevalonate kinase OS=Mus musculus OX=10090 GN=Pmvk PE=1 SV=3	4	1	1	1	192	21.9	5.99
Q61103	Dpf2		Zinc finger protein ubi-d4 OS=Mus musculus OX=10090 GN=Dpf2 PE=1 SV=1	4	1	1	1	391	44.2	6.47
Q3U319	Rnf40		E3 ubiquitin-protein ligase BRE1B OS=Mus musculus OX=10090 GN=Rnf40 PE=1 SV=2	1	1	1	1	1001	113.9	6.48
P18608	Hmgn1		Non-histone chromosomal protein HMG-14 OS=Mus musculus OX=10090 GN=Hmgn1 PE=1 SV=2	8	1	1	1	96	10.1	9.76
P60762	Morf4l1		Mortality factor 4-like protein 1 OS=Mus musculus OX=10090 GN=Morf4l1 PE=1 SV=2	11	3	3	3	362	41.5	9.32
Q9JJF3	Riox1		Ribosomal oxygenase 1 OS=Mus musculus OX=10090 GN=Riox1 PE=1 SV=2	2	1	1	1	603	67.5	8.66
Q9JHS3	Lamtor2		Ragulator complex protein LAMTOR2 OS=Mus musculus OX=10090 GN=Lamtor2 PE=1 SV=1	8	1	1	1	125	13.5	5.4
P12787	Cox5a		Cytochrome c oxidase subunit 5A, mitochondrial OS=Mus musculus OX=10090 GN=Cox5a PE=1 SV=2	28	3	3	3	146	16.1	6.54
P36536	Sar1a		GTP-binding protein SAR1a OS=Mus musculus OX=10090 GN=Sar1a PE=1 SV=1	6	1	1	1	198	22.4	6.93
Q3UKJ7	Smu1		WD40 repeat-containing protein SMU1 OS=Mus musculus OX=10090 GN=Smu1 PE=2 SV=2	17	8	10	8	513	57.5	7.18
P61957	Sumo2		Small ubiquitin-related modifier 2 OS=Mus musculus OX=10090 GN=Sumo2 PE=1 SV=1	23	2	3	2	95	10.9	5.5
Q8CI51	Pdlim5		PDZ and LIM domain protein 5 OS=Mus musculus OX=10090 GN=Pdlim5 PE=1 SV=4	4	2	2	2	591	63.3	8.25
Q8C172	Cers6		Ceramide synthase 6 OS=Mus musculus OX=10090 GN=Cers6 PE=1 SV=1	3	1	1	1	384	44.8	7.64
Q8K4L3	Svil		Supervillin OS=Mus musculus OX=10090 GN=Svil PE=1 SV=1	2	4	4	4	2170	243	6.87
Q60931	Vdac3		Voltage-dependent anion-selective channel protein 3 OS=Mus musculus OX=10090 GN=Vdac3 PE=1 SV=1	58	12	17	11	283	30.7	8.79
P97825	Jpt1		Jupiter microtubule associated homolog 1 OS=Mus musculus OX=10090 GN=Jpt1 PE=1 SV=3	18	2	2	2	154	16.1	5.31
Q61072	Adam9		Disintegrin and metalloproteinase domain-containing protein 9 OS=Mus musculus OX=10090 GN=Adam9 PE=1 SV=2	3	2	2	2	845	92	7.47
Q80X41	Vrk1		Serine/threonine-protein kinase VRK1 OS=Mus musculus OX=10090 GN=Vrk1 PE=1 SV=2	25	9	9	9	440	49.7	8.94
Q9DCJ7	Aurkaip1		Aurora kinase A-interacting protein OS=Mus musculus OX=10090 GN=Aurkaip1 PE=1 SV=2	5	1	1	1	200	23.3	10.73
O55234	Psmb5		Proteasome subunit beta type-5 OS=Mus musculus OX=10090 GN=Psmb5 PE=1 SV=3	34	8	8	8	264	28.5	7.02
Q9CR67	Tmem33		Transmembrane protein 33 OS=Mus musculus OX=10090 GN=Tmem33 PE=1 SV=1	5	1	1	1	247	28	9.66
P35293	Rab18		Ras-related protein Rab-18 OS=Mus musculus OX=10090 GN=Rab18 PE=1 SV=2	5	1	1	1	206	23	5.36
Q8R5K2	Usp33		Ubiquitin carboxyl-terminal hydrolase 33 OS=Mus musculus OX=10090 GN=Usp33 PE=1 SV=2	1	1	1	1	909	102.7	5.73
G5E829	Atp2b1		Plasma membrane calcium-transporting ATPase 1 OS=Mus musculus OX=10090 GN=Atp2b1 PE=1 SV=1	2	2	2	2	1220	134.7	5.91
Q9ERU9	Ranbp2		E3 SUMO-protein ligase RanBP2 OS=Mus musculus OX=10090 GN=Ranbp2 PE=1 SV=2	11	28	28	28	3053	340.9	6.18
Q9CQ88	Tspan31		Tetraspanin-31 OS=Mus musculus OX=10090 GN=Tspan31 PE=1 SV=1	10	2	2	2	210	22.7	8.44
Q8BHC4	Dcakd		Dephospho-CoA kinase domain-containing protein OS=Mus musculus OX=10090 GN=Dcakd PE=1 SV=1	3	1	1	1	231	26.5	9.58
P45377	Akr1b8		Aldose reductase-related protein 2 OS=Mus musculus OX=10090 GN=Akr1b8 PE=1 SV=2	16	5	5	4	316	36.1	6.37
Q3V1L4	Nt5c2		Cytosolic purine 5'-nucleotidase OS=Mus musculus OX=10090 GN=Nt5c2 PE=1 SV=2	2	1	1	1	560	64.8	6.21
Q80XU3	Nucks1		Nuclear ubiquitous casein and cyclin-dependent kinase substrate 1 OS=Mus musculus OX=10090 GN=Nucks1 PE=1 SV=1	9	2	2	2	234	26.3	5.14
Q6NZJ6	Eif4g1		Eukaryotic translation initiation factor 4 gamma 1 OS=Mus musculus OX=10090 GN=Eif4g1 PE=1 SV=1	17	25	26	25	1600	176	5.4
Q9D0I8	Mrto4		mRNA turnover protein 4 homolog OS=Mus musculus OX=10090 GN=Mrto4 PE=1 SV=1	3	1	1	1	239	27.5	8.54
Q04692	Smarcad1		SWI/SNF-related matrix-associated actin-dependent regulator of chromatin subfamily A containing DEAD/H box 1 OS=Mus musculus OX=10090 GN=Smarcad1 PE=1 SV=2	1	1	1	1	1021	116.4	5.68
Q8R2Y8	Ptrh2		Peptidyl-tRNA hydrolase 2, mitochondrial OS=Mus musculus OX=10090 GN=Ptrh2 PE=1 SV=1	8	1	1	1	181	19.5	7.42
Q9D0W5	Ppil1		Peptidyl-prolyl cis-trans isomerase-like 1 OS=Mus musculus OX=10090 GN=Ppil1 PE=1 SV=1	16	2	2	2	166	18.2	7.99
Q7TQK4	Exosc3		Exosome complex component RRP40 OS=Mus musculus OX=10090 GN=Exosc3 PE=1 SV=3	3	1	1	1	274	29.5	8.06
Q9CWW6	Pin4		Peptidyl-prolyl cis-trans isomerase NIMA-interacting 4 OS=Mus musculus OX=10090 GN=Pin4 PE=1 SV=1	9	1	1	1	131	13.8	9.77
O55029	Copb2		Coatomer subunit beta' OS=Mus musculus OX=10090 GN=Copb2 PE=1 SV=2	8	6	6	6	905	102.4	5.3
O35343	Kpna4		Importin subunit alpha-3 OS=Mus musculus OX=10090 GN=Kpna4 PE=1 SV=1	16	5	6	2	521	57.9	4.94
P24452	Capg		Macrophage-capping protein OS=Mus musculus OX=10090 GN=Capg PE=1 SV=2	13	4	5	4	352	39.2	7.2
Q9DBV4	Mxra8		Matrix remodeling-associated protein 8 OS=Mus musculus OX=10090 GN=Mxra8 PE=1 SV=1	2	1	1	1	442	49.7	7.15
Q8BFQ4	Wdr82		WD repeat-containing protein 82 OS=Mus musculus OX=10090 GN=Wdr82 PE=1 SV=1	9	2	2	2	313	35.1	7.69
O35350	Capn1		Calpain-1 catalytic subunit OS=Mus musculus OX=10090 GN=Capn1 PE=1 SV=1	2	1	1	1	713	82.1	5.87
B1ARD6	Slfn9		Schlafen family member 9 OS=Mus musculus OX=10090 GN=Slfn9 PE=2 SV=1	1	1	1	1	910	103.9	7.3
O35215	Ddt		D-dopachrome decarboxylase OS=Mus musculus OX=10090 GN=Ddt PE=1 SV=3	7	1	1	1	118	13.1	6.54
Q09143	Slc7a1		High affinity cationic amino acid transporter 1 OS=Mus musculus OX=10090 GN=Slc7a1 PE=1 SV=1	2	1	1	1	622	67	7.06
Q8CDN6	Txnl1		Thioredoxin-like protein 1 OS=Mus musculus OX=10090 GN=Txnl1 PE=1 SV=3	29	5	5	5	289	32.2	4.96
P21279	Gnaq		Guanine nucleotide-binding protein G(q) subunit alpha OS=Mus musculus OX=10090 GN=Gnaq PE=1 SV=4	12	4	4	2	359	42.1	5.68
Q9D868	Ppih		Peptidyl-prolyl cis-trans isomerase H OS=Mus musculus OX=10090 GN=Ppih PE=1 SV=1	14	3	3	3	188	20.5	8.09
Q9CSH3	Dis3		Exosome complex exonuclease RRP44 OS=Mus musculus OX=10090 GN=Dis3 PE=1 SV=4	5	4	4	4	958	108.8	7.53
Q62186	Ssr4		Translocon-associated protein subunit delta OS=Mus musculus OX=10090 GN=Ssr4 PE=1 SV=1	23	3	3	3	172	18.9	5.78
Q8CH25	Sltm		SAFB-like transcription modulator OS=Mus musculus OX=10090 GN=Sltm PE=1 SV=1	9	8	8	8	1031	116.9	7.72
Q3UH60	Dip2b		Disco-interacting protein 2 homolog B OS=Mus musculus OX=10090 GN=Dip2b PE=1 SV=1	0	1	1	1	1574	171	8.09
Q9Z1Z0	Uso1		General vesicular transport factor p115 OS=Mus musculus OX=10090 GN=Uso1 PE=1 SV=2	6	5	5	5	959	106.9	4.93
Q9QUR6	Prep		Prolyl endopeptidase OS=Mus musculus OX=10090 GN=Prep PE=1 SV=1	8	5	5	5	710	80.7	5.73
Q8K021	Scamp1		Secretory carrier-associated membrane protein 1 OS=Mus musculus OX=10090 GN=Scamp1 PE=1 SV=1	4	1	1	1	338	38	7.71
Q9ERS2	Ndufa13		NADH dehydrogenase [ubiquinone] 1 alpha subcomplex subunit 13 OS=Mus musculus OX=10090 GN=Ndufa13 PE=1 SV=3	8	1	1	1	144	16.8	9.48
O08917	Flot1		Flotillin-1 OS=Mus musculus OX=10090 GN=Flot1 PE=1 SV=1	10	4	4	4	428	47.5	7.15
Q8CAY6	Acat2		Acetyl-CoA acetyltransferase, cytosolic OS=Mus musculus OX=10090 GN=Acat2 PE=1 SV=2	37	9	11	9	397	41.3	7.5
Q80TH2	Erbin		Erbin OS=Mus musculus OX=10090 GN=Erbin PE=1 SV=3	0	1	1	1	1402	157.2	5.69
Q9QXZ0	Macf1		Microtubule-actin cross-linking factor 1, isoforms 1/2/3/4 OS=Mus musculus OX=10090 GN=Macf1 PE=1 SV=2	3	17	17	17	7354	831.4	5.43
Q60930	Vdac2		Voltage-dependent anion-selective channel protein 2 OS=Mus musculus OX=10090 GN=Vdac2 PE=1 SV=2	47	11	14	11	295	31.7	7.49
Q9JLR9	Higd1a		HIG1 domain family member 1A, mitochondrial OS=Mus musculus OX=10090 GN=Higd1a PE=1 SV=1	19	1	1	1	95	10.4	9.79
P81269	Atf1		Cyclic AMP-dependent transcription factor ATF-1 OS=Mus musculus OX=10090 GN=Atf1 PE=1 SV=1	9	3	3	1	269	29.2	8.37
P97304	Polr1d		DNA-directed RNA polymerases I and III subunit RPAC2 OS=Mus musculus OX=10090 GN=Polr1d PE=1 SV=1	30	3	3	3	133	15.1	6.9
Q921W0	Chmp1a		Charged multivesicular body protein 1a OS=Mus musculus OX=10090 GN=Chmp1a PE=1 SV=1	4	1	1	1	196	21.6	8.06
Q9DB15	Mrpl12		39S ribosomal protein L12, mitochondrial OS=Mus musculus OX=10090 GN=Mrpl12 PE=1 SV=2	17	3	3	3	201	21.7	9.29
Q9ER00	Stx12		Syntaxin-12 OS=Mus musculus OX=10090 GN=Stx12 PE=1 SV=1	6	1	1	1	274	31.2	5.44
Q8R1Q8	Dync1li1		Cytoplasmic dynein 1 light intermediate chain 1 OS=Mus musculus OX=10090 GN=Dync1li1 PE=1 SV=1	6	3	3	2	523	56.6	6.42
Q8CJ26	Nradd		Death domain-containing membrane protein NRADD OS=Mus musculus OX=10090 GN=Nradd PE=1 SV=1	5	1	1	1	228	24.7	5.01
Q6P6M7	Sepsecs		O-phosphoseryl-tRNA(Sec) selenium transferase OS=Mus musculus OX=10090 GN=Sepsecs PE=1 SV=2	1	1	1	1	504	55.3	8.06
P83877	Txnl4a		Thioredoxin-like protein 4A OS=Mus musculus OX=10090 GN=Txnl4a PE=1 SV=1	8	1	1	1	142	16.8	5.85
Q9QYE6	Golga5		Golgin subfamily A member 5 OS=Mus musculus OX=10090 GN=Golga5 PE=1 SV=2	2	1	1	1	729	82.3	6.23
Q80YS6	Afap1		Actin filament-associated protein 1 OS=Mus musculus OX=10090 GN=Afap1 PE=1 SV=1	1	1	1	1	731	80.6	8.68
P59470	Polr3b		DNA-directed RNA polymerase III subunit RPC2 OS=Mus musculus OX=10090 GN=Polr3b PE=1 SV=2	1	1	2	1	1133	127.6	8.5
Q6A4J8	Usp7		Ubiquitin carboxyl-terminal hydrolase 7 OS=Mus musculus OX=10090 GN=Usp7 PE=1 SV=1	4	5	5	5	1103	128.4	5.5
Q8R0G9	Nup133		Nuclear pore complex protein Nup133 OS=Mus musculus OX=10090 GN=Nup133 PE=1 SV=2	3	3	3	3	1155	128.5	5.2
Q80UM3	Naa15		N-alpha-acetyltransferase 15, NatA auxiliary subunit OS=Mus musculus OX=10090 GN=Naa15 PE=1 SV=1	11	10	10	10	865	100.9	7.62
Q6P069	Sri		Sorcin OS=Mus musculus OX=10090 GN=Sri PE=1 SV=1	21	4	4	4	198	21.6	5.59
P83882	Rpl36a		60S ribosomal protein L36a OS=Mus musculus OX=10090 GN=Rpl36a PE=1 SV=2	8	1	1	1	106	12.4	10.58
Q6ZQ38	Cand1		Cullin-associated NEDD8-dissociated protein 1 OS=Mus musculus OX=10090 GN=Cand1 PE=1 SV=2	22	23	23	23	1230	136.2	5.78
Q921X9	Pdia5		Protein disulfide-isomerase A5 OS=Mus musculus OX=10090 GN=Pdia5 PE=1 SV=1	13	7	7	7	517	59.2	7.5
Q9CZ30	Ola1		Obg-like ATPase 1 OS=Mus musculus OX=10090 GN=Ola1 PE=1 SV=1	16	6	6	6	396	44.7	7.81
P35951	Ldlr		Low-density lipoprotein receptor OS=Mus musculus OX=10090 GN=Ldlr PE=1 SV=2	2	1	1	1	862	94.9	5.02
O35682	Myadm		Myeloid-associated differentiation marker OS=Mus musculus OX=10090 GN=Myadm PE=1 SV=2	5	1	2	1	320	35.3	8.31
P24668	M6pr		Cation-dependent mannose-6-phosphate receptor OS=Mus musculus OX=10090 GN=M6pr PE=1 SV=1	10	3	3	3	278	31.2	5.39
P16110	Lgals3		Galectin-3 OS=Mus musculus OX=10090 GN=Lgals3 PE=1 SV=3	39	9	13	9	264	27.5	8.38
O88532	Zfr		Zinc finger RNA-binding protein OS=Mus musculus OX=10090 GN=Zfr PE=1 SV=2	5	5	5	5	1074	116.8	9.04
Q8BQZ4	Ralgapb		Ral GTPase-activating protein subunit beta OS=Mus musculus OX=10090 GN=Ralgapb PE=1 SV=2	0	1	1	1	1484	165.1	6.77
Q8K224	Nat10		RNA cytidine acetyltransferase OS=Mus musculus OX=10090 GN=Nat10 PE=1 SV=1	1	1	1	1	1024	115.3	8.32
Q9DB85	Rrp8		Ribosomal RNA-processing protein 8 OS=Mus musculus OX=10090 GN=Rrp8 PE=1 SV=1	3	1	1	1	457	51	9.76
Q9CYA0	Creld2		Protein disulfide isomerase Creld2 OS=Mus musculus OX=10090 GN=Creld2 PE=1 SV=1	3	1	1	1	350	38.2	4.58
Q9JJZ6	Klf13		Krueppel-like factor 13 OS=Mus musculus OX=10090 GN=Klf13 PE=1 SV=2	6	1	1	1	289	31.1	9.64
Q9QYJ0	Dnaja2		DnaJ homolog subfamily A member 2 OS=Mus musculus OX=10090 GN=Dnaja2 PE=1 SV=1	6	2	2	2	412	45.7	6.48
Q3UIA2	Arhgap17		Rho GTPase-activating protein 17 OS=Mus musculus OX=10090 GN=Arhgap17 PE=1 SV=1	1	1	1	1	846	92.1	7.56
P99024	Tubb5		Tubulin beta-5 chain OS=Mus musculus OX=10090 GN=Tubb5 PE=1 SV=1	72	21	38	4	444	49.6	4.89
Q8BXA1	Golim4		Golgi integral membrane protein 4 OS=Mus musculus OX=10090 GN=Golim4 PE=1 SV=1	7	4	4	4	655	76.7	4.83
Q8VHG2	Amot		Angiomotin OS=Mus musculus OX=10090 GN=Amot PE=1 SV=3	1	1	1	1	1126	120.8	7.5
P80313	Cct7		T-complex protein 1 subunit eta OS=Mus musculus OX=10090 GN=Cct7 PE=1 SV=1	44	20	21	20	544	59.6	7.84
O54998	Fkbp7		Peptidyl-prolyl cis-trans isomerase FKBP7 OS=Mus musculus OX=10090 GN=Fkbp7 PE=1 SV=1	9	2	2	2	218	24.9	6.04
P17047	Lamp2		Lysosome-associated membrane glycoprotein 2 OS=Mus musculus OX=10090 GN=Lamp2 PE=1 SV=2	9	4	4	4	415	45.7	7.39
P54731	Faf1		FAS-associated factor 1 OS=Mus musculus OX=10090 GN=Faf1 PE=1 SV=2	2	2	2	2	649	73.8	4.86
Q8K0V4	Cnot3		CCR4-NOT transcription complex subunit 3 OS=Mus musculus OX=10090 GN=Cnot3 PE=1 SV=1	4	3	3	3	751	81.9	6.2
Q60972	Rbbp4		Histone-binding protein RBBP4 OS=Mus musculus OX=10090 GN=Rbbp4 PE=1 SV=5	31	10	11	5	425	47.6	4.89
P35279	Rab6a		Ras-related protein Rab-6A OS=Mus musculus OX=10090 GN=Rab6a PE=1 SV=4	17	3	4	2	208	23.6	5.54
Q8BYC6	Taok3		Serine/threonine-protein kinase TAO3 OS=Mus musculus OX=10090 GN=Taok3 PE=1 SV=2	4	4	4	3	898	105.3	7.36
Q8R332	Nup58		Nucleoporin p58/p45 OS=Mus musculus OX=10090 GN=Nup58 PE=1 SV=1	1	1	1	1	587	59.4	9.29
P84084	Arf5		ADP-ribosylation factor 5 OS=Mus musculus OX=10090 GN=Arf5 PE=1 SV=2	53	8	8	3	180	20.5	6.79
Q8K1R3	Pnpt1		Polyribonucleotide nucleotidyltransferase 1, mitochondrial OS=Mus musculus OX=10090 GN=Pnpt1 PE=1 SV=1	6	4	4	4	783	85.6	8.03
Q99M28	Rnps1		RNA-binding protein with serine-rich domain 1 OS=Mus musculus OX=10090 GN=Rnps1 PE=1 SV=1	14	4	5	4	305	34.2	11.84
O54962	Banf1		Barrier-to-autointegration factor OS=Mus musculus OX=10090 GN=Banf1 PE=1 SV=1	56	4	5	4	89	10.1	6.09
P62827	Ran		GTP-binding nuclear protein Ran OS=Mus musculus OX=10090 GN=Ran PE=1 SV=3	37	7	8	7	216	24.4	7.49
Q8BX17	Gemin5		Gem-associated protein 5 OS=Mus musculus OX=10090 GN=Gemin5 PE=1 SV=2	1	2	2	2	1502	166.5	6.71
Q05793	Hspg2		Basement membrane-specific heparan sulfate proteoglycan core protein OS=Mus musculus OX=10090 GN=Hspg2 PE=1 SV=1	2	5	5	5	3707	398	6.32
Q91VC3	Eif4a3		Eukaryotic initiation factor 4A-III OS=Mus musculus OX=10090 GN=Eif4a3 PE=1 SV=3	40	17	18	14	411	46.8	6.73
O35074	Ptgis		Prostacyclin synthase OS=Mus musculus OX=10090 GN=Ptgis PE=1 SV=1	2	1	1	1	501	57	6.73
P68372	Tubb4b		Tubulin beta-4B chain OS=Mus musculus OX=10090 GN=Tubb4b PE=1 SV=1	62	19	34	2	445	49.8	4.89
O08539	Bin1		Myc box-dependent-interacting protein 1 OS=Mus musculus OX=10090 GN=Bin1 PE=1 SV=1	8	3	3	3	588	64.4	5.03
Q8R143	Pttg1ip		Pituitary tumor-transforming gene 1 protein-interacting protein OS=Mus musculus OX=10090 GN=Pttg1ip PE=1 SV=1	9	2	2	2	174	20	8.63
Q3TN34	Micall2		MICAL-like protein 2 OS=Mus musculus OX=10090 GN=Micall2 PE=1 SV=1	2	1	1	1	1009	108.2	9.55
Q9ERF3	Skic8		SKI8 subunit of superkiller complex protein OS=Mus musculus OX=10090 GN=Skic8 PE=1 SV=1	11	2	2	2	305	33.8	5.36
Q8BU11	Tox4		TOX high mobility group box family member 4 OS=Mus musculus OX=10090 GN=Tox4 PE=1 SV=3	2	1	1	1	619	65.9	5.01
Q69ZN7	Myof		Myoferlin OS=Mus musculus OX=10090 GN=Myof PE=1 SV=2	24	40	41	40	2048	233.2	6.16
P11087	Col1a1		Collagen alpha-1(I) chain OS=Mus musculus OX=10090 GN=Col1a1 PE=1 SV=4	19	20	23	20	1453	137.9	5.85
P19001	Krt19		Keratin, type I cytoskeletal 19 OS=Mus musculus OX=10090 GN=Krt19 PE=1 SV=1	13	7	9	1	403	44.5	5.39
P0DOV2	Ifi204		Interferon-activable protein 204 OS=Mus musculus OX=10090 GN=Ifi204 PE=1 SV=1	8	5	5	5	619	69.4	8.69
Q9WVK4	Ehd1		EH domain-containing protein 1 OS=Mus musculus OX=10090 GN=Ehd1 PE=1 SV=1	18	9	10	4	534	60.6	6.83
Q9DBS1	Tmem43		Transmembrane protein 43 OS=Mus musculus OX=10090 GN=Tmem43 PE=1 SV=1	17	5	5	5	400	44.8	7.36
P43407	Sdc2		Syndecan-2 OS=Mus musculus OX=10090 GN=Sdc2 PE=1 SV=1	4	1	1	1	202	22.1	4.58
Q3TCN2	Plbd2		Putative phospholipase B-like 2 OS=Mus musculus OX=10090 GN=Plbd2 PE=1 SV=2	3	2	2	2	594	66.2	6.13
Q9CZ04	Cops7a		COP9 signalosome complex subunit 7a OS=Mus musculus OX=10090 GN=Cops7a PE=1 SV=2	5	1	1	1	275	30.2	7.87
O35381	Anp32a		Acidic leucine-rich nuclear phosphoprotein 32 family member A OS=Mus musculus OX=10090 GN=Anp32a PE=1 SV=1	14	3	3	3	247	28.5	4.07
Q8K339	Kin		DNA/RNA-binding protein KIN17 OS=Mus musculus OX=10090 GN=Kin PE=1 SV=1	3	1	1	1	391	44.7	9.04
Q9ER69	Wtap		Pre-mRNA-splicing regulator WTAP OS=Mus musculus OX=10090 GN=Wtap PE=1 SV=3	7	2	2	2	396	44.2	5.25
Q9DBE9	Ftsj3		pre-rRNA 2'-O-ribose RNA methyltransferase FTSJ3 OS=Mus musculus OX=10090 GN=Ftsj3 PE=1 SV=1	13	9	9	9	838	95.5	8.38
Q61171	Prdx2		Peroxiredoxin-2 OS=Mus musculus OX=10090 GN=Prdx2 PE=1 SV=3	48	7	7	7	198	21.8	5.41
Q91XV3	Basp1		Brain acid soluble protein 1 OS=Mus musculus OX=10090 GN=Basp1 PE=1 SV=3	62	10	16	10	226	22.1	4.51
Q9WVE8	Pacsin2		Protein kinase C and casein kinase substrate in neurons protein 2 OS=Mus musculus OX=10090 GN=Pacsin2 PE=1 SV=1	13	7	7	7	486	55.8	5.2
Q91V92	Acly		ATP-citrate synthase OS=Mus musculus OX=10090 GN=Acly PE=1 SV=1	28	26	27	26	1091	119.7	7.44
Q66JS6	Eif3j2		Eukaryotic translation initiation factor 3 subunit J-B OS=Mus musculus OX=10090 GN=Eif3j2 PE=1 SV=1	31	8	8	8	263	29.5	4.81
Q9EPT5	Slco2a1		Solute carrier organic anion transporter family member 2A1 OS=Mus musculus OX=10090 GN=Slco2a1 PE=1 SV=2	2	1	1	1	643	70.1	8.75
Q9JMH6	Txnrd1		Thioredoxin reductase 1, cytoplasmic OS=Mus musculus OX=10090 GN=Txnrd1 PE=1 SV=3	11	5	6	5	613	67	7.44
Q9DB77	Uqcrc2		Cytochrome b-c1 complex subunit 2, mitochondrial OS=Mus musculus OX=10090 GN=Uqcrc2 PE=1 SV=1	36	12	15	12	453	48.2	9.25
P59708	Sf3b6		Splicing factor 3B subunit 6 OS=Mus musculus OX=10090 GN=Sf3b6 PE=1 SV=1	46	5	5	5	125	14.6	9.38
P46460	Nsf		Vesicle-fusing ATPase OS=Mus musculus OX=10090 GN=Nsf PE=1 SV=2	10	6	6	6	744	82.6	6.95
P56395	Cyb5a		Cytochrome b5 OS=Mus musculus OX=10090 GN=Cyb5a PE=1 SV=2	41	4	5	4	134	15.2	5.07
Q9CR21	Ndufab1		Acyl carrier protein, mitochondrial OS=Mus musculus OX=10090 GN=Ndufab1 PE=1 SV=1	15	3	3	3	156	17.4	5.21
Q61595	Ktn1		Kinectin OS=Mus musculus OX=10090 GN=Ktn1 PE=1 SV=1	29	32	38	32	1327	152.5	5.86
P63260	Actg1		Actin, cytoplasmic 2 OS=Mus musculus OX=10090 GN=Actg1 PE=1 SV=1	74	21	113	1	375	41.8	5.48
Q91WK2	Eif3h		Eukaryotic translation initiation factor 3 subunit H OS=Mus musculus OX=10090 GN=Eif3h PE=1 SV=1	33	10	11	10	352	39.8	6.67
Q8C7X2	Emc1		ER membrane protein complex subunit 1 OS=Mus musculus OX=10090 GN=Emc1 PE=1 SV=1	3	2	2	2	997	111.5	7.43
Q9QZF2	Gpc1		Glypican-1 OS=Mus musculus OX=10090 GN=Gpc1 PE=1 SV=1	4	2	2	2	557	61.3	7.05
Q05186	Rcn1		Reticulocalbin-1 OS=Mus musculus OX=10090 GN=Rcn1 PE=1 SV=1	17	4	4	4	325	38.1	4.84
Q9DBL1	Acadsb		Short/branched chain specific acyl-CoA dehydrogenase, mitochondrial OS=Mus musculus OX=10090 GN=Acadsb PE=1 SV=1	5	1	1	1	432	47.8	7.87
Q08288	Lyar		Cell growth-regulating nucleolar protein OS=Mus musculus OX=10090 GN=Lyar PE=1 SV=2	32	11	13	11	388	43.7	9.5
P29758	Oat		Ornithine aminotransferase, mitochondrial OS=Mus musculus OX=10090 GN=Oat PE=1 SV=1	36	13	13	13	439	48.3	6.62
Q9ERE7	Mesd		LRP chaperone MESD OS=Mus musculus OX=10090 GN=Mesd PE=1 SV=1	24	4	4	4	224	25.2	6.34
Q9CQC6	Bzw1		eIF5-mimic protein 2 OS=Mus musculus OX=10090 GN=Bzw1 PE=1 SV=1	16	8	8	8	419	48	5.92
Q8BTM8	Flna		Filamin-A OS=Mus musculus OX=10090 GN=Flna PE=1 SV=5	39	71	83	62	2647	281	6.04
Q8CI11	Gnl3		Guanine nucleotide-binding protein-like 3 OS=Mus musculus OX=10090 GN=Gnl3 PE=1 SV=2	25	10	10	10	538	60.7	9.11
O88783	F5		Coagulation factor V OS=Mus musculus OX=10090 GN=F5 PE=1 SV=1	2	4	5	4	2183	247.1	6.05
P51174	Acadl		Long-chain specific acyl-CoA dehydrogenase, mitochondrial OS=Mus musculus OX=10090 GN=Acadl PE=1 SV=2	21	7	7	7	430	47.9	8.31
Q692V3	Ttc41		Tetratricopeptide repeat protein 41 OS=Mus musculus OX=10090 GN=Ttc41 PE=1 SV=1	1	1	1	1	1318	150.7	8.68
Q8VDF2	Uhrf1		E3 ubiquitin-protein ligase UHRF1 OS=Mus musculus OX=10090 GN=Uhrf1 PE=1 SV=2	10	7	7	7	782	88.2	8.31
P26231	Ctnna1		Catenin alpha-1 OS=Mus musculus OX=10090 GN=Ctnna1 PE=1 SV=1	5	3	3	3	906	100	6.23
P18872	Gnao1		Guanine nucleotide-binding protein G(o) subunit alpha OS=Mus musculus OX=10090 GN=Gnao1 PE=1 SV=3	17	5	7	3	354	40.1	5.53
Q6IRU2	Tpm4		Tropomyosin alpha-4 chain OS=Mus musculus OX=10090 GN=Tpm4 PE=1 SV=3	66	20	23	17	248	28.5	4.68
Q7TPR4	Actn1		Alpha-actinin-1 OS=Mus musculus OX=10090 GN=Actn1 PE=1 SV=1	60	43	56	28	892	103	5.38
Q3UJB9	Edc4		Enhancer of mRNA-decapping protein 4 OS=Mus musculus OX=10090 GN=Edc4 PE=1 SV=2	3	4	4	4	1406	152.4	5.78
Q9WUP7	Uchl5		Ubiquitin carboxyl-terminal hydrolase isozyme L5 OS=Mus musculus OX=10090 GN=Uchl5 PE=1 SV=2	13	4	4	4	329	37.6	5.33
Q6A065	Cep170		Centrosomal protein of 170 kDa OS=Mus musculus OX=10090 GN=Cep170 PE=1 SV=2	1	2	2	2	1588	174.9	7.17
Q9QY15	Ddx25		ATP-dependent RNA helicase DDX25 OS=Mus musculus OX=10090 GN=Ddx25 PE=1 SV=2	5	1	3	1	484	54.8	5.99
P63168	Dynll1		Dynein light chain 1, cytoplasmic OS=Mus musculus OX=10090 GN=Dynll1 PE=1 SV=1	25	1	2	1	89	10.4	7.4
O70591	Pfdn2		Prefoldin subunit 2 OS=Mus musculus OX=10090 GN=Pfdn2 PE=1 SV=2	17	2	2	2	154	16.5	6.58
Q6PFQ7	Rasa4		Ras GTPase-activating protein 4 OS=Mus musculus OX=10090 GN=Rasa4 PE=1 SV=1	1	1	1	1	802	90	8
P59328	Wdhd1		WD repeat and HMG-box DNA-binding protein 1 OS=Mus musculus OX=10090 GN=Wdhd1 PE=1 SV=2	1	1	1	1	1117	124.2	5.63
P60603	Romo1		Reactive oxygen species modulator 1 OS=Mus musculus OX=10090 GN=Romo1 PE=2 SV=1	22	1	1	1	79	8.2	9.33
Q9WVC3	Cav2		Caveolin-2 OS=Mus musculus OX=10090 GN=Cav2 PE=1 SV=1	17	2	2	2	162	18.2	5.63
Q8BPB5	Efemp1		EGF-containing fibulin-like extracellular matrix protein 1 OS=Mus musculus OX=10090 GN=Efemp1 PE=1 SV=1	18	7	8	7	493	54.9	5.14
P61089	Ube2n		Ubiquitin-conjugating enzyme E2 N OS=Mus musculus OX=10090 GN=Ube2n PE=1 SV=1	29	4	4	4	152	17.1	6.57
O55128	Sap18		Histone deacetylase complex subunit SAP18 OS=Mus musculus OX=10090 GN=Sap18 PE=1 SV=1	24	4	5	4	153	17.6	9.35
Q9WVA3	Bub3		Mitotic checkpoint protein BUB3 OS=Mus musculus OX=10090 GN=Bub3 PE=1 SV=2	44	10	11	10	326	36.9	6.84
P10711	Tcea1		Transcription elongation factor A protein 1 OS=Mus musculus OX=10090 GN=Tcea1 PE=1 SV=2	38	11	11	11	301	33.9	8.38
Q9WUK2	Eif4h		Eukaryotic translation initiation factor 4H OS=Mus musculus OX=10090 GN=Eif4h PE=1 SV=3	12	3	3	3	248	27.3	7.23
Q9CY58	Serbp1		Plasminogen activator inhibitor 1 RNA-binding protein OS=Mus musculus OX=10090 GN=Serbp1 PE=1 SV=2	37	14	16	14	407	44.7	8.54
P70460	Vasp		Vasodilator-stimulated phosphoprotein OS=Mus musculus OX=10090 GN=Vasp PE=1 SV=4	2	1	1	1	375	39.6	8.53
Q3TZZ7	Esyt2		Extended synaptotagmin-2 OS=Mus musculus OX=10090 GN=Esyt2 PE=1 SV=1	5	4	4	4	845	94.1	7.75
Q64516	Gk		Glycerol kinase OS=Mus musculus OX=10090 GN=Gk PE=1 SV=2	2	1	1	1	559	61.2	5.87
P16125	Ldhb		L-lactate dehydrogenase B chain OS=Mus musculus OX=10090 GN=Ldhb PE=1 SV=2	6	2	3	1	334	36.5	6.05
P63163	Snrpn		Small nuclear ribonucleoprotein-associated protein N OS=Mus musculus OX=10090 GN=Snrpn PE=1 SV=1	24	6	9	6	240	24.6	11.19
P08752	Gnai2		Guanine nucleotide-binding protein G(i) subunit alpha-2 OS=Mus musculus OX=10090 GN=Gnai2 PE=1 SV=5	42	11	13	8	355	40.5	5.45
Q78ZA7	Nap1l4		Nucleosome assembly protein 1-like 4 OS=Mus musculus OX=10090 GN=Nap1l4 PE=1 SV=1	3	1	1	1	375	42.7	4.67
Q6ZWM4	Lsm8		U6 snRNA-associated Sm-like protein LSm8 OS=Mus musculus OX=10090 GN=Lsm8 PE=1 SV=3	45	4	4	4	96	10.4	4.48
Q99ME9	Gtpbp4		GTP-binding protein 4 OS=Mus musculus OX=10090 GN=Gtpbp4 PE=1 SV=3	2	1	1	1	634	74.1	9.52
Q9CQT2	Rbm7		RNA-binding protein 7 OS=Mus musculus OX=10090 GN=Rbm7 PE=1 SV=1	7	1	1	1	265	30.1	9.38
Q8JZX4	Rbm17		Splicing factor 45 OS=Mus musculus OX=10090 GN=Rbm17 PE=1 SV=1	12	5	5	4	405	45.3	5.82
Q91VM5	Rbmxl1		RNA binding motif protein, X-linked-like-1 OS=Mus musculus OX=10090 GN=Rbmxl1 PE=2 SV=1	42	17	18	17	388	42.1	9.99
Q9D6R2	Idh3a		Isocitrate dehydrogenase [NAD] subunit alpha, mitochondrial OS=Mus musculus OX=10090 GN=Idh3a PE=1 SV=1	26	8	10	8	366	39.6	6.73
Q9D832	Dnajb4		DnaJ homolog subfamily B member 4 OS=Mus musculus OX=10090 GN=Dnajb4 PE=1 SV=1	12	4	4	4	337	37.8	8.59
Q925I1	Atad3		ATPase family AAA domain-containing protein 3 OS=Mus musculus OX=10090 GN=Atad3 PE=1 SV=1	16	10	10	10	591	66.7	9.29
P80318	Cct3		T-complex protein 1 subunit gamma OS=Mus musculus OX=10090 GN=Cct3 PE=1 SV=1	48	21	22	21	545	60.6	6.7
P62196	Psmc5		26S proteasome regulatory subunit 8 OS=Mus musculus OX=10090 GN=Psmc5 PE=1 SV=1	46	15	15	13	406	45.6	7.55
Q3THK7	Gmps		GMP synthase [glutamine-hydrolyzing] OS=Mus musculus OX=10090 GN=Gmps PE=1 SV=2	9	5	5	5	693	76.7	6.73
Q91V61	Sfxn3		Sideroflexin-3 OS=Mus musculus OX=10090 GN=Sfxn3 PE=1 SV=1	12	3	4	3	321	35.4	9.51
Q9Z0U1	Tjp2		Tight junction protein ZO-2 OS=Mus musculus OX=10090 GN=Tjp2 PE=1 SV=2	11	11	11	11	1167	131.2	6.79
O35344	Kpna3		Importin subunit alpha-4 OS=Mus musculus OX=10090 GN=Kpna3 PE=1 SV=1	12	4	4	1	521	57.7	4.94
Q02053	Uba1		Ubiquitin-like modifier-activating enzyme 1 OS=Mus musculus OX=10090 GN=Uba1 PE=1 SV=1	18	16	16	16	1058	117.7	5.66
Q8BU30	Iars1		Isoleucine--tRNA ligase, cytoplasmic OS=Mus musculus OX=10090 GN=Iars1 PE=1 SV=2	9	10	10	10	1262	144.2	6.55
Q9Z1G3	Atp6v1c1		V-type proton ATPase subunit C 1 OS=Mus musculus OX=10090 GN=Atp6v1c1 PE=1 SV=4	4	2	2	2	382	43.9	7.46
Q8BHK9	Ercc6l		DNA excision repair protein ERCC-6-like OS=Mus musculus OX=10090 GN=Ercc6l PE=1 SV=1	1	1	1	1	1240	138.8	5.21
[truncated: 218 more rows]

## Sheet:  list for JASPAR
JASPAR(Mus) (7)
Matrix ID	Name	Score	Relative score	Sequence ID	Start	End	Strand	Predicted sequence
MA0035.1	MA0035.1.Gata1	6.92224	0.990064	NC_000085.7:c36898999-36896999	371	376	+	AGATGG
MA0035.1	MA0035.1.Gata1	6.92224	0.990064	NC_000085.7:c36898999-36896999	454	459	-	AGATGG
MA0035.1	MA0035.1.Gata1	6.92224	0.990064	NC_000085.7:c36898999-36896999	639	644	+	AGATGG
MA0035.1	MA0035.1.Gata1	6.92224	0.990064	NC_000085.7:c36898999-36896999	875	880	+	AGATGG
MA0006.1	MA0006.1.Ahr::Arnt	9.19659	0.982764	NC_000085.7:c36898999-36896999	1824	1829	+	CGCGTG
MA0006.1	MA0006.1.Ahr::Arnt	9.19659	0.982764	NC_000085.7:c36898999-36896999	1836	1841	-	CGCGTG
MA0035.1	MA0035.1.Gata1	6.71309	0.978684	NC_000085.7:c36898999-36896999	904	909	+	TGATGG
MA0035.1	MA0035.1.Gata1	6.50356	0.967285	NC_000085.7:c36898999-36896999	1647	1652	-	AGATGC
MA0035.1	MA0035.1.Gata1	6.29441	0.955905	NC_000085.7:c36898999-36896999	354	359	-	TGATGC
MA0035.1	MA0035.1.Gata1	6.29441	0.955905	NC_000085.7:c36898999-36896999	967	972	+	TGATGC
MA0035.1	MA0035.1.Gata1	6.24911	0.95344	NC_000085.7:c36898999-36896999	1255	1260	-	GGATAG
MA0035.1	MA0035.1.Gata1	6.06648	0.943504	NC_000085.7:c36898999-36896999	725	730	+	AGATAG
MA0035.1	MA0035.1.Gata1	5.9664	0.938059	NC_000085.7:c36898999-36896999	1434	1439	+	GGATGT
MA0035.1	MA0035.1.Gata1	5.85733	0.932125	NC_000085.7:c36898999-36896999	1392	1397	-	TGATAG
MA0035.1	MA0035.1.Gata1	5.85733	0.932125	NC_000085.7:c36898999-36896999	1814	1819	-	TGATAG
MA0035.1	MA0035.1.Gata1	5.78377	0.928123	NC_000085.7:c36898999-36896999	984	989	-	AGATGT
MA0027.1	MA0027.1.En1	7.51824	0.925338	NC_000085.7:c36898999-36896999	1285	1295	-	AAGTAGTAATC
MA0035.1	MA0035.1.Gata1	5.6478	0.920725	NC_000085.7:c36898999-36896999	582	587	+	AGATAC
MA0035.1	MA0035.1.Gata1	5.6478	0.920725	NC_000085.7:c36898999-36896999	1845	1850	-	AGATAC
MA0002.2	MA0002.2.Runx1	10.977	0.912117	NC_000085.7:c36898999-36896999	495	505	-	GTATGTGGTCT
MA0035.1	MA0035.1.Gata1	5.37659	0.905969	NC_000085.7:c36898999-36896999	689	694	-	GGATTC
MA0035.1	MA0035.1.Gata1	5.31531	0.902635	NC_000085.7:c36898999-36896999	522	527	+	AGATGA
MA0035.1	MA0035.1.Gata1	5.31531	0.902635	NC_000085.7:c36898999-36896999	1504	1509	+	AGATGA
MA0035.1	MA0035.1.Gata1	5.31531	0.902635	NC_000085.7:c36898999-36896999	1677	1682	-	AGATGA
MA0027.1	MA0027.1.En1	6.78119	0.895779	NC_000085.7:c36898999-36896999	143	153	-	AAGTGGTTTTG
MA0035.1	MA0035.1.Gata1	5.11064	0.8915	NC_000085.7:c36898999-36896999	1397	1402	-	GGATAT
MA0002.2	MA0002.2.Runx1	9.91058	0.891327	NC_000085.7:c36898999-36896999	1205	1215	-	GTTTTTGGTTT
MA0035.1	MA0035.1.Gata1	5.10616	0.891256	NC_000085.7:c36898999-36896999	1442	1447	+	TGATGA
MA0027.1	MA0027.1.En1	6.583	0.88783	NC_000085.7:c36898999-36896999	728	738	+	TAGTAGACTCC
MA0027.1	MA0027.1.En1	6.4435	0.882235	NC_000085.7:c36898999-36896999	684	694	+	GAGTTGAATCC
MA0002.2	MA0002.2.Runx1	9.4323	0.882002	NC_000085.7:c36898999-36896999	387	397	+	CCATGTGGTTG
MA0002.2	MA0002.2.Runx1	9.4323	0.882002	NC_000085.7:c36898999-36896999	929	939	-	CCATGTGGTTG
MA0035.1	MA0035.1.Gata1	4.92801	0.881563	NC_000085.7:c36898999-36896999	359	364	-	AGATAT
MA0027.1	MA0027.1.En1	6.38202	0.87977	NC_000085.7:c36898999-36896999	547	557	-	AAGTTATTTTT
MA0002.2	MA0002.2.Runx1	9.24773	0.878404	NC_000085.7:c36898999-36896999	1329	1339	-	CTTTGTGGTAG
MA0035.1	MA0035.1.Gata1	4.7255	0.870545	NC_000085.7:c36898999-36896999	600	605	+	AGATCC
MA0035.1	MA0035.1.Gata1	4.7255	0.870545	NC_000085.7:c36898999-36896999	1560	1565	-	AGATCC
MA0004.1	MA0004.1.Arnt	7.10338	0.870422	NC_000085.7:c36898999-36896999	1824	1829	+	CGCGTG
MA0004.1	MA0004.1.Arnt	7.10338	0.870422	NC_000085.7:c36898999-36896999	1836	1841	-	CGCGTG
MA0002.2	MA0002.2.Runx1	8.71326	0.867983	NC_000085.7:c36898999-36896999	1613	1623	-	TGTTTTGGTTT
MA0035.1	MA0035.1.Gata1	4.65679	0.866807	NC_000085.7:c36898999-36896999	401	406	+	GGATTT
MA0035.1	MA0035.1.Gata1	4.65679	0.866807	NC_000085.7:c36898999-36896999	533	538	-	GGATTT
MA0035.1	MA0035.1.Gata1	4.65679	0.866807	NC_000085.7:c36898999-36896999	920	925	-	GGATTT
MA0035.1	MA0035.1.Gata1	4.65679	0.866807	NC_000085.7:c36898999-36896999	1123	1128	+	GGATTT
MA0035.1	MA0035.1.Gata1	4.47416	0.856871	NC_000085.7:c36898999-36896999	297	302	+	AGATTT
MA0035.1	MA0035.1.Gata1	4.45955	0.856076	NC_000085.7:c36898999-36896999	29	34	+	AGATAA
MA0035.1	MA0035.1.Gata1	4.45955	0.856076	NC_000085.7:c36898999-36896999	1703	1708	+	AGATAA
MA0006.1	MA0006.1.Ahr::Arnt	6.15805	0.853843	NC_000085.7:c36898999-36896999	784	789	-	TGTGTG
MA0006.1	MA0006.1.Ahr::Arnt	6.15805	0.853843	NC_000085.7:c36898999-36896999	786	791	-	TGTGTG
MA0006.1	MA0006.1.Ahr::Arnt	6.15805	0.853843	NC_000085.7:c36898999-36896999	1574	1579	-	TGTGTG
MA0006.1	MA0006.1.Ahr::Arnt	6.15805	0.853843	NC_000085.7:c36898999-36896999	1576	1581	-	TGTGTG
MA0006.1	MA0006.1.Ahr::Arnt	6.15805	0.853843	NC_000085.7:c36898999-36896999	1578	1583	-	TGTGTG
MA0006.1	MA0006.1.Ahr::Arnt	6.15805	0.853843	NC_000085.7:c36898999-36896999	1853	1858	+	TGTGTG
MA0006.1	MA0006.1.Ahr::Arnt	6.15805	0.853843	NC_000085.7:c36898999-36896999	1855	1860	+	TGTGTG
MA0027.1	MA0027.1.En1	5.72805	0.853542	NC_000085.7:c36898999-36896999	389	399	+	ATGTGGTTGCT
MA0027.1	MA0027.1.En1	5.72805	0.853542	NC_000085.7:c36898999-36896999	927	937	-	ATGTGGTTGCT
MA0002.2	MA0002.2.Runx1	7.91857	0.85249	NC_000085.7:c36898999-36896999	1224	1234	-	TGCTGTTGTTT
MA0027.1	MA0027.1.En1	5.6992	0.852385	NC_000085.7:c36898999-36896999	1301	1311	-	AAGTGGTGTAA
MA0027.1	MA0027.1.En1	5.66666	0.85108	NC_000085.7:c36898999-36896999	382	392	-	ACATGGTGGCT
MA0027.1	MA0027.1.En1	5.66666	0.85108	NC_000085.7:c36898999-36896999	934	944	+	ACATGGTGGCT
MA0002.2	MA0002.2.Runx1	7.68013	0.847841	NC_000085.7:c36898999-36896999	1414	1424	-	CATTTTGGTTT
MA0027.1	MA0027.1.En1	5.5671	0.847087	NC_000085.7:c36898999-36896999	1862	1872	+	TAGCAGTGGCC
MA0027.1	MA0027.1.En1	5.52985	0.845593	NC_000085.7:c36898999-36896999	81	91	-	TGGTAGAGGAC
MA0035.1	MA0035.1.Gata1	4.26501	0.845492	NC_000085.7:c36898999-36896999	139	144	-	TGATTT
MA0035.1	MA0035.1.Gata1	4.26501	0.845492	NC_000085.7:c36898999-36896999	1341	1346	-	TGATTT
MA0035.1	MA0035.1.Gata1	4.2504	0.844697	NC_000085.7:c36898999-36896999	1468	1473	+	TGATAA
MA0035.1	MA0035.1.Gata1	4.2504	0.844697	NC_000085.7:c36898999-36896999	1931	1936	+	TGATAA
MA0004.1	MA0004.1.Arnt	6.41459	0.842941	NC_000085.7:c36898999-36896999	762	767	-	TACGTG
MA0035.1	MA0035.1.Gata1	4.18834	0.84132	NC_000085.7:c36898999-36896999	600	605	-	GGATCT
MA0035.1	MA0035.1.Gata1	4.18834	0.84132	NC_000085.7:c36898999-36896999	1092	1097	-	GGATTA
MA0035.1	MA0035.1.Gata1	4.18834	0.84132	NC_000085.7:c36898999-36896999	1560	1565	+	GGATCT
MA0035.1	MA0035.1.Gata1	4.18834	0.84132	NC_000085.7:c36898999-36896999	1967	1972	-	GGATTA
MA0027.1	MA0027.1.En1	5.30807	0.836698	NC_000085.7:c36898999-36896999	1155	1165	+	AAAGTGAGTTC
MA0006.1	MA0006.1.Ahr::Arnt	5.75182	0.836607	NC_000085.7:c36898999-36896999	1082	1087	+	CGCTTG
MA0027.1	MA0027.1.En1	5.29423	0.836144	NC_000085.7:c36898999-36896999	1907	1917	+	AGGGGGAGGCC
MA0027.1	MA0027.1.En1	5.27018	0.835179	NC_000085.7:c36898999-36896999	352	362	-	ATATGATGCCC
MA0027.1	MA0027.1.En1	5.25155	0.834432	NC_000085.7:c36898999-36896999	626	636	+	AGGGAGTCTTC
MA0029.1	MA0029.1.Mecom	11.6723	0.832961	NC_000085.7:c36898999-36896999	1697	1710	+	TAGACCAGATAAAT
MA0035.1	MA0035.1.Gata1	4.0057	0.831383	NC_000085.7:c36898999-36896999	1284	1289	+	AGATTA
MA0035.1	MA0035.1.Gata1	4.0057	0.831383	NC_000085.7:c36898999-36896999	1388	1393	-	AGATTA
MA0004.1	MA0004.1.Arnt	6.11163	0.830853	NC_000085.7:c36898999-36896999	240	245	+	CACATG
MA0004.1	MA0004.1.Arnt	6.11163	0.830853	NC_000085.7:c36898999-36896999	240	245	-	CATGTG
MA0004.1	MA0004.1.Arnt	6.11163	0.830853	NC_000085.7:c36898999-36896999	388	393	+	CATGTG
MA0004.1	MA0004.1.Arnt	6.11163	0.830853	NC_000085.7:c36898999-36896999	388	393	-	CACATG
MA0004.1	MA0004.1.Arnt	6.11163	0.830853	NC_000085.7:c36898999-36896999	679	684	+	CACCTG
MA0004.1	MA0004.1.Arnt	6.11163	0.830853	NC_000085.7:c36898999-36896999	679	684	-	CAGGTG
MA0004.1	MA0004.1.Arnt	6.11163	0.830853	NC_000085.7:c36898999-36896999	762	767	+	CACGTA
MA0004.1	MA0004.1.Arnt	6.11163	0.830853	NC_000085.7:c36898999-36896999	933	938	+	CACATG
MA0004.1	MA0004.1.Arnt	6.11163	0.830853	NC_000085.7:c36898999-36896999	933	938	-	CATGTG
MA0004.1	MA0004.1.Arnt	6.11163	0.830853	NC_000085.7:c36898999-36896999	1062	1067	+	CAGGTG
MA0004.1	MA0004.1.Arnt	6.11163	0.830853	NC_000085.7:c36898999-36896999	1062	1067	-	CACCTG
MA0004.1	MA0004.1.Arnt	6.11163	0.830853	NC_000085.7:c36898999-36896999	1307	1312	+	CACTTG
MA0004.1	MA0004.1.Arnt	6.11163	0.830853	NC_000085.7:c36898999-36896999	1307	1312	-	CAAGTG
MA0004.1	MA0004.1.Arnt	6.11163	0.830853	NC_000085.7:c36898999-36896999	1525	1530	+	CACTTG
MA0004.1	MA0004.1.Arnt	6.11163	0.830853	NC_000085.7:c36898999-36896999	1525	1530	-	CAAGTG
MA0004.1	MA0004.1.Arnt	6.11163	0.830853	NC_000085.7:c36898999-36896999	1801	1806	-	CATGTG
MA0004.1	MA0004.1.Arnt	6.11163	0.830853	NC_000085.7:c36898999-36896999	1801	1806	+	CACATG
MA0004.1	MA0004.1.Arnt	6.11163	0.830853	NC_000085.7:c36898999-36896999	1824	1829	-	CACGCG
MA0004.1	MA0004.1.Arnt	6.11163	0.830853	NC_000085.7:c36898999-36896999	1836	1841	+	CACGCG
MA0002.2	MA0002.2.Runx1	6.80215	0.830724	NC_000085.7:c36898999-36896999	199	209	-	TCCTGTGATCT
MA0027.1	MA0027.1.En1	5.14939	0.830334	NC_000085.7:c36898999-36896999	374	384	+	TGGTTGTGAGC
MA0027.1	MA0027.1.En1	5.14939	0.830334	NC_000085.7:c36898999-36896999	942	952	-	TGGTTGTGAGC
MA0002.2	MA0002.2.Runx1	6.74677	0.829644	NC_000085.7:c36898999-36896999	443	453	-	CTCAGTGGGTA
MA0002.2	MA0002.2.Runx1	6.72656	0.82925	NC_000085.7:c36898999-36896999	1576	1586	-	TTCTGTGTGTG
MA0002.2	MA0002.2.Runx1	6.72656	0.82925	NC_000085.7:c36898999-36896999	1850	1860	+	TTCTGTGTGTG
MA0018.2	MA0018.2.CREB1	6.90521	0.829221	NC_000085.7:c36898999-36896999	1463	1470	+	TGACATGA
MA0018.2	MA0018.2.CREB1	6.90521	0.829221	NC_000085.7:c36898999-36896999	1795	1802	-	TGACATGA
MA0027.1	MA0027.1.En1	5.10183	0.828427	NC_000085.7:c36898999-36896999	1659	1669	-	CAATAATATTC
MA0027.1	MA0027.1.En1	5.088	0.827872	NC_000085.7:c36898999-36896999	725	735	+	AGATAGTAGAC
MA0018.2	MA0018.2.CREB1	6.79596	0.82522	NC_000085.7:c36898999-36896999	218	225	+	TGAAGCCA
MA0027.1	MA0027.1.En1	4.99767	0.82425	NC_000085.7:c36898999-36896999	1487	1497	+	AAATAGTGGGG
MA0027.1	MA0027.1.En1	4.94841	0.822274	NC_000085.7:c36898999-36896999	945	955	-	GGGTGGTTGTG
MA0029.1	MA0029.1.Mecom	11.1158	0.821957	NC_000085.7:c36898999-36896999	1748	1761	-	AAAATAAGACAAAT
MA0035.1	MA0035.1.Gata1	3.79655	0.820004	NC_000085.7:c36898999-36896999	199	204	-	TGATCT
MA0035.1	MA0035.1.Gata1	3.79655	0.820004	NC_000085.7:c36898999-36896999	1147	1152	+	TGATCT
MA0027.1	MA0027.1.En1	4.86621	0.818977	NC_000085.7:c36898999-36896999	893	903	-	GAAGAGAGTTC
MA0027.1	MA0027.1.En1	4.82832	0.817458	NC_000085.7:c36898999-36896999	811	821	+	ATGTAAAATTC
MA0002.2	MA0002.2.Runx1	6.11713	0.817368	NC_000085.7:c36898999-36896999	1698	1708	-	TTATCTGGTCT
MA0006.1	MA0006.1.Ahr::Arnt	5.29689	0.817305	NC_000085.7:c36898999-36896999	762	767	-	TACGTG
MA0006.1	MA0006.1.Ahr::Arnt	5.29689	0.817305	NC_000085.7:c36898999-36896999	951	956	-	TGGGTG
MA0006.1	MA0006.1.Ahr::Arnt	5.29689	0.817305	NC_000085.7:c36898999-36896999	1066	1071	+	TGGGTG
MA0006.1	MA0006.1.Ahr::Arnt	5.29689	0.817305	NC_000085.7:c36898999-36896999	1459	1464	+	TGAGTG
MA0006.1	MA0006.1.Ahr::Arnt	5.29689	0.817305	NC_000085.7:c36898999-36896999	1593	1598	-	TGCATG
MA0027.1	MA0027.1.En1	4.68874	0.81186	NC_000085.7:c36898999-36896999	371	381	+	AGATGGTTGTG
MA0027.1	MA0027.1.En1	4.64605	0.810148	NC_000085.7:c36898999-36896999	205	215	-	AGGTTGTCCTG
MA0027.1	MA0027.1.En1	4.64605	0.810148	NC_000085.7:c36898999-36896999	493	503	-	ATGTGGTCTTT
MA0027.1	MA0027.1.En1	4.64605	0.810148	NC_000085.7:c36898999-36896999	1073	1083	+	CGGTGGTGGCG
MA0027.1	MA0027.1.En1	4.64118	0.809952	NC_000085.7:c36898999-36896999	296	306	-	AAATAAATCTT
MA0002.2	MA0002.2.Runx1	5.72548	0.809733	NC_000085.7:c36898999-36896999	1852	1862	+	CTGTGTGTGTT
MA0018.2	MA0018.2.CREB1	6.3593	0.809229	NC_000085.7:c36898999-36896999	234	241	-	TGAGGGCA
MA0027.1	MA0027.1.En1	4.62255	0.809205	NC_000085.7:c36898999-36896999	221	231	-	GAGGAATGGCT
MA0014.1	MA0014.1.Pax5	9.15128	0.808074	NC_000085.7:c36898999-36896999	1528	1547	-	AGGGCCCGGTGGGGTGACAA
MA0027.1	MA0027.1.En1	4.58466	0.807686	NC_000085.7:c36898999-36896999	1296	1306	-	GTGTAATGTTT
MA0027.1	MA0027.1.En1	4.55581	0.806529	NC_000085.7:c36898999-36896999	154	164	-	AAGTAATAATA
MA0035.1	MA0035.1.Gata1	3.53724	0.805896	NC_000085.7:c36898999-36896999	199	204	+	AGATCA
MA0035.1	MA0035.1.Gata1	3.53724	0.805896	NC_000085.7:c36898999-36896999	1147	1152	-	AGATCA
MA0002.2	MA0002.2.Runx1	5.47465	0.804842	NC_000085.7:c36898999-36896999	145	155	-	TAAAGTGGTTT
MA0027.1	MA0027.1.En1	4.50437	0.804466	NC_000085.7:c36898999-36896999	37	47	+	AAATTAAGTGC
MA0002.2	MA0002.2.Runx1	5.3429	0.802274	NC_000085.7:c36898999-36896999	1045	1055	-	TTTTTTGTTTT
MA0002.2	MA0002.2.Runx1	5.3429	0.802274	NC_000085.7:c36898999-36896999	1623	1633	-	TTTTTTGTTTT
MA0002.2	MA0002.2.Runx1	5.33428	0.802106	NC_000085.7:c36898999-36896999	341	351	-	TCTTCTGGTGT
MA0027.1	MA0027.1.En1	4.42626	0.801333	NC_000085.7:c36898999-36896999	1339	1349	-	GAATGATTTGC
MA0018.2	MA0018.2.CREB1	6.14073	0.801224	NC_000085.7:c36898999-36896999	1136	1143	+	CGAGGCCA
MA0006.1	MA0006.1.Ahr::Arnt	4.89067	0.800069	NC_000085.7:c36898999-36896999	433	438	+	CGGGTG
MA0006.1	MA0006.1.Ahr::Arnt	4.89067	0.800069	NC_000085.7:c36898999-36896999	1101	1106	-	CGAGTG
MA0006.1	MA0006.1.Ahr::Arnt	4.89067	0.800069	NC_000085.7:c36898999-36896999	1118	1123	-	CGCCTG
MA0006.1	MA0006.1.Ahr::Arnt	4.89067	0.800069	NC_000085.7:c36898999-36896999	1840	1845	+	CGGGTG
