# Supplementary material for: Caveolae-Mediated Sensing of Nanoporous Cues in Fibroblasts Reprogramming During Wound Healing
Source: Research Square preprint supplement (doi:10.21203/rs.3.rs-5955293/v1), 2025-02-19
Supplement: Supplementary file 2 [file c453e66da2cb370228afb1e0.xlsx]

## Sheet: Cav1 IP protein
Entry	Gene_Name	GeneID	Product	GO_id	GO_term	pathway	pathway_description	KOG_id	KOG_abbreviation	KOG_description	KOG_function_class	eggNOG_id	eggNOG_abbreviation	eggNOG_description	eggNOG_function_classification	PFAM_Family	PFAM_Name	PFAM_description
A0JP43	Efcab5	319634	EF-hand calcium-binding domain-containing protein 5	GO:0005509	calcium ion binding							ENOG502R5M0	S	calcium ion binding	Function unknown
A1L317	Krt24	75706	Keratin, type I cytoskeletal 24	GO:0005882,GO:0005198	intermediate filament|structural molecule activity	mmu04915,mmu05150	Estrogen signaling pathway|Staphylococcus aureus infection					ENOG502QTM6	S	structural molecule activity	Function unknown	PF00038	Filament	Intermediate filament protein
A2A432	Cul4b	72584	Cullin-4B	GO:0080008,GO:0031465,GO:0031461,GO:0005829,GO:0005654,GO:0005634,GO:0019005,GO:0031625,GO:0004842,GO:0007049,GO:0006974,GO:0035518,GO:0031175,GO:1900087,GO:0045732,GO:0010498,GO:0016567,GO:0042254,GO:0031146,GO:0070914	Cul4-RING E3 ubiquitin ligase complex|Cul4B-RING E3 ubiquitin ligase complex|cullin-RING ubiquitin ligase complex|cytosol|nucleoplasm|nucleus|SCF ubiquitin ligase complex|ubiquitin protein ligase binding|ubiquitin-protein transferase activity|cell cycle|cellular response to DNA damage stimulus|histone H2A monoubiquitination|neuron projection development|positive regulation of G1/S transition of m…	mmu04120,mmu03420,mmu05170	Ubiquitin mediated proteolysis|Nucleotide excision repair|Human immunodeficiency virus 1 infection	KOG2167	[D]	Cullins	Cell cycle control, cell division, chromosome partitioning	KOG2167	O	ubiquitin protein ligase binding	Posttranslational modification, protein turnover, chaperones	PF00888	Cullin	Cullin family
A2A891	Camta1	100072	Calmodulin-binding transcription activator 1	GO:0005829,GO:0005730,GO:0005634,GO:0003690,GO:0043565,GO:0003712,GO:0050885,GO:0070886,GO:0035307,GO:0045944,GO:0006357	cytosol|nucleolus|nucleus|double-stranded DNA binding|sequence-specific DNA binding|transcription coregulator activity|neuromuscular process controlling balance|positive regulation of calcineurin-NFAT signaling cascade|positive regulation of protein dephosphorylation|positive regulation of transcription by RNA polymerase II|regulation of transcription by RNA polymerase II			KOG0520	[S]	Uncharacterized conserved protein, contains IPT/TIG domain	Function unknown	KOG0520	S	proximal promoter DNA-binding transcription activator activity, RNA polymerase II-specific	Function unknown	PF01833	TIG	IPT/TIG domain
A2A8L1	Chd5	269610	Chromodomain-helicase-DNA-binding protein 5	GO:0005829,GO:0000792,GO:0016607,GO:0005654,GO:0005634,GO:0016581,GO:0005524,GO:0140603,GO:0003682,GO:0003677,GO:0003678,GO:0061628,GO:0042393,GO:0042826,GO:0046872,GO:0070615,GO:0021895,GO:0098532,GO:0043967,GO:0008285,GO:0000122,GO:1901798,GO:0045595,GO:0006357,GO:0035093,GO:0006366	cytosol|heterochromatin|nuclear speck|nucleoplasm|nucleus|NuRD complex|ATP binding|ATP hydrolysis activity|chromatin binding|DNA binding|DNA helicase activity|H3K27me3 modified histone binding|histone binding|histone deacetylase binding|metal ion binding|nucleosome-dependent ATPase activity|cerebral cortex neuron differentiation|histone H3-K27 trimethylation|histone H4 acetylation|negative regula…			KOG0383	[R]	Predicted helicase	General function prediction only	KOG0383	K	peripheral T cell tolerance induction	Transcription	PF00176	SNF2_N	SNF2 family N-terminal domain
A2AAY5	Sh3pxd2b	268396	SH3 and PX domain-containing protein 2B	GO:0030054,GO:0042995,GO:0005737,GO:0002102,GO:0060090,GO:0080025,GO:0032266,GO:0070273,GO:0010314,GO:0042169,GO:0016176,GO:0060612,GO:0060348,GO:1904888,GO:0022617,GO:0001654,GO:0007507,GO:0002051,GO:0071800,GO:1904179,GO:0045600,GO:0010628,GO:0040018,GO:0051496,GO:0072657,GO:0060378,GO:0001501,GO:0048705,GO:0006801	cell junction|cell projection|cytoplasm|podosome|molecular adaptor activity|phosphatidylinositol-3,5-bisphosphate binding|phosphatidylinositol-3-phosphate binding|phosphatidylinositol-4-phosphate binding|phosphatidylinositol-5-phosphate binding|SH2 domain binding|superoxide-generating NADPH oxidase activator activity|adipose tissue development|bone development|cranial skeletal system development|…							KOG0905	B	1-phosphatidylinositol-4-phosphate 3-kinase activity	Chromatin structure and dynamics	PF00018	SH3_1	SH3 domain
A2AGH6	Med12	59024	Mediator of RNA polymerase II transcription subunit 12	GO:0016592,GO:0005654,GO:0005634,GO:0000151,GO:0008013,GO:0003682,GO:0008022,GO:0019904,GO:0000978,GO:0046966,GO:0003713,GO:0003712,GO:0061630,GO:0090245,GO:0060070,GO:1990403,GO:0048702,GO:0048568,GO:0007492,GO:0007507,GO:0001843,GO:0021915,GO:0014003,GO:0045944,GO:0060261,GO:0045893,GO:0036342,GO:0016567,GO:0006357,GO:0014044,GO:0001756,GO:0021510,GO:0019827,GO:0060071	mediator complex|nucleoplasm|nucleus|ubiquitin ligase complex|beta-catenin binding|chromatin binding|protein C-terminus binding|protein domain specific binding|RNA polymerase II cis-regulatory region sequence-specific DNA binding|thyroid hormone receptor binding|transcription coactivator activity|transcription coregulator activity|ubiquitin protein ligase activity|axis elongation involved in somi…	mmu04919	Thyroid hormone signaling pathway	KOG3598	[K]	Thyroid hormone receptor-associated protein complex, subunit TRAP230	Transcription	KOG3598	S	Mediator of RNA polymerase II transcription subunit	Function unknown	PF09497	Med12	Transcription mediator complex subunit Med12
A2AGT5	Ckap5	75786	Cytoskeleton-associated protein 5	GO:0005813,GO:0005737,GO:0030425,GO:0000776,GO:0071598,GO:0005730,GO:0043204,GO:0005886,GO:0098794,GO:0032991,GO:0000922,GO:0008017,GO:0061863,GO:0043021,GO:0051301,GO:0032289,GO:0007098,GO:0051298,GO:0002181,GO:0097062,GO:0030951,GO:0060079,GO:0046959,GO:0007626,GO:0060291,GO:0046785,GO:0007052,GO:0010609,GO:0045807,GO:0090063,GO:0022618,GO:0050658,GO:0007051,GO:0008542	centrosome|cytoplasm|dendrite|kinetochore|neuronal ribonucleoprotein granule|nucleolus|perikaryon|plasma membrane|postsynapse|protein-containing complex|spindle pole|microtubule binding|microtubule plus end polymerase|ribonucleoprotein complex binding|cell division|central nervous system myelin formation|centrosome cycle|centrosome duplication|cytoplasmic translation|dendritic spine maintenance|e…			KOG1820	[Z]	Microtubule-associated protein	Cytoskeleton	KOG1820	I	microtubule plus end polymerase	Lipid transport and metabolism	PF12348	CLASP_N	CLASP N terminal
A2AN08	Ubr4	69116	E3 ubiquitin-protein ligase UBR4	GO:0005813,GO:0005829,GO:0016021,GO:0005654,GO:0005516,GO:0061630,GO:0004842,GO:0008270,GO:0006511	centrosome|cytosol|integral component of membrane|nucleoplasm|calmodulin binding|ubiquitin protein ligase activity|ubiquitin-protein transferase activity|zinc ion binding|ubiquitin-dependent protein catabolic process	mmu05203,mmu05165	Viral carcinogenesis|Human papillomavirus infection	KOG1776	[T]	Zn-binding protein Push	Signal transduction mechanisms	KOG1776	G	zinc ion binding	Carbohydrate transport and metabolism	PF02207	zf-UBR	Putative zinc finger in N-recognin (UBR box)
A2AX52	Col6a4	68553	Collagen alpha-4(VI) chain	GO:0005581,GO:0062023,GO:0031012,GO:0005576,GO:0032991,GO:0005518,GO:0007155,GO:0030198	collagen trimer|collagen-containing extracellular matrix|extracellular matrix|extracellular region|protein-containing complex|collagen binding|cell adhesion|extracellular matrix organization	mmu04151,mmu04512,mmu04510,mmu04974,mmu05165	PI3K-Akt signaling pathway|ECM-receptor interaction|Focal adhesion|Protein digestion and absorption|Human papillomavirus infection	KOG3544	[W]	Collagens (type IV and type XIII), and related proteins	Extracellular structures	KOG3544	D	structural constituent of cuticle	Cell cycle control, cell division, chromosome partitioning	PF00092	VWA	von Willebrand factor type A domain
A2RST1	Mgst2	211666	Microsomal glutathione S-transferase 2	GO:0005737,GO:0005783,GO:0005789,GO:0016021,GO:0043231,GO:0016020,GO:0005635,GO:0005886,GO:0008047,GO:0043295,GO:0004602,GO:0004364,GO:0042802,GO:0004464,GO:0006750,GO:0019370,GO:0006629,GO:0046466	cytoplasm|endoplasmic reticulum|endoplasmic reticulum membrane|integral component of membrane|intracellular membrane-bounded organelle|membrane|nuclear envelope|plasma membrane|enzyme activator activity|glutathione binding|glutathione peroxidase activity|glutathione transferase activity|identical protein binding|leukotriene-C4 synthase activity|glutathione biosynthetic process|leukotriene biosynt…	mmu00480,mmu00980,mmu00982,mmu00983,mmu05200,mmu05204,mmu05207,mmu05208,mmu05225,mmu05418,mmu01524	Glutathione metabolism|Metabolism of xenobiotics by cytochrome P450|Drug metabolism - cytochrome P450|Drug metabolism - other enzymes|Pathways in cancer|Chemical carcinogenesis - DNA adducts|Chemical carcinogenesis - receptor activation|Chemical carcinogenesis - reactive oxygen species|Hepatocellular carcinoma|Fluid shear stress and atherosclerosis|Platinum drug resistance					ENOG502S082	S	leukotriene-C4 synthase activity	Function unknown	PF01124	MAPEG	MAPEG family
A2RT67	Dennd3	105841	DENN domain-containing protein 3	GO:0031410,GO:0005085,GO:0044257,GO:0008333,GO:0032483	cytoplasmic vesicle|guanyl-nucleotide exchange factor activity|cellular protein catabolic process|endosome to lysosome transport|regulation of Rab protein signal transduction			KOG2127	[T]	Calmodulin-binding protein CRAG, contains DENN domain	Signal transduction mechanisms	KOG2127	S	Rab guanyl-nucleotide exchange factor activity	Function unknown	PF02141	DENN	DENN (AEX-3) domain
A4Q9E5	Ttll3	101100	Tubulin monoglycylase TTLL3	GO:0005930,GO:0005929,GO:0005874,GO:0015630,GO:0036126,GO:0005524,GO:0070735,GO:0070736,GO:0035082,GO:0060271,GO:0030317,GO:0018094	axoneme|cilium|microtubule|microtubule cytoskeleton|sperm flagellum|ATP binding|protein-glycine ligase activity|protein-glycine ligase activity, initiating|axoneme assembly|cilium assembly|flagellated sperm motility|protein polyglycylation			KOG2157	[O]	Predicted tubulin-tyrosine ligase	Posttranslational modification, protein turnover, chaperones	KOG2157	S	protein polyglycylation	Function unknown	PF03133	TTL	Tubulin-tyrosine ligase family
B1AQ75	Krt36	16673	Keratin, type I cuticular Ha6	GO:0005882,GO:0045111,GO:0030280,GO:0045616	intermediate filament|intermediate filament cytoskeleton|structural constituent of skin epidermis|regulation of keratinocyte differentiation	mmu04915,mmu05150	Estrogen signaling pathway|Staphylococcus aureus infection					ENOG502QQY9	S	keratin, type I cuticular	Function unknown	PF00038	Filament	Intermediate filament protein
B1ARD6	Slfn9	237886	Schlafen family member 9	GO:0005737,GO:0005634,GO:0005524,GO:0004521,GO:0000049,GO:0008270,GO:0051607	cytoplasm|nucleus|ATP binding|endoribonuclease activity|tRNA binding|zinc ion binding|defense response to virus							ENOG502QWKG	S	platelet maturation	Function unknown	PF04326	AlbA_2	Putative DNA-binding domain
B2RQC6	Cad	69719	CAD protein	GO:0042995,GO:0005737,GO:0005829,GO:0043025,GO:0016363,GO:0005654,GO:0005634,GO:0032991,GO:0043195,GO:0016597,GO:0004070,GO:0005524,GO:0004088,GO:0004151,GO:0019899,GO:0042802,GO:0004672,GO:0002134,GO:0008270,GO:0006207,GO:0044205,GO:0031100,GO:0035690,GO:0071364,GO:0019240,GO:0017144,GO:0007565,GO:0006541,GO:0007507,GO:0007595,GO:0001889,GO:0006807,GO:0018107,GO:0046777,GO:0014075,GO:0031000,GO:…	cell projection|cytoplasm|cytosol|neuronal cell body|nuclear matrix|nucleoplasm|nucleus|protein-containing complex|terminal bouton|amino acid binding|aspartate carbamoyltransferase activity|ATP binding|carbamoyl-phosphate synthase (glutamine-hydrolyzing) activity|dihydroorotase activity|enzyme binding|identical protein binding|protein kinase activity|UTP binding|zinc ion binding|'de novo' pyrimid…	mmu00240,mmu00250	Pyrimidine metabolism|Alanine, aspartate and glutamate metabolism	KOG0370	[R]	Multifunctional pyrimidine synthesis protein CAD (includes carbamoyl-phophate synthetase, aspartate transcarbamylase, and glutamine amidotransferase)	General function prediction only	KOG0370	E	carbamoyl-phosphate synthase (glutamine-hydrolyzing) activity	Amino acid transport and metabolism	PF00117	GATase	Glutamine amidotransferase class-I
B2RY56	Rbm25	67039	RNA-binding protein 25	GO:0005737,GO:0016607,GO:0003729,GO:0006915,GO:0006397,GO:0000381,GO:0042981,GO:0008380	cytoplasm|nuclear speck|mRNA binding|apoptotic process|mRNA processing|regulation of alternative mRNA splicing, via spliceosome|regulation of apoptotic process|RNA splicing	mmu03040	Spliceosome	KOG2253	[A]	U1 snRNP complex, subunit SNU71 and related PWI-motif proteins	RNA processing and modification	KOG2253	S	mRNA processing	Function unknown	PF00076	RRM_1	RNA recognition motif. (a.k.a. RRM, RBD, or RNP domain)
B7ZMP1	Xpnpep3	321003	Xaa-Pro aminopeptidase 3	GO:0005829,GO:0005739,GO:0004177,GO:0030145,GO:0070006,GO:0008233,GO:0042803,GO:0003094,GO:0016485	cytosol|mitochondrion|aminopeptidase activity|manganese ion binding|metalloaminopeptidase activity|peptidase activity|protein homodimerization activity|glomerular filtration|protein processing			KOG2414	[E]	Putative Xaa-Pro aminopeptidase	Amino acid transport and metabolism	KOG2414	E	Aminopeptidase	Amino acid transport and metabolism	PF00557	Peptidase_M24	Metallopeptidase family M24
C0HKE1	H2ac4	665433	Histone H2A type 1-B	GO:0000786,GO:0005634,GO:0003677,GO:0046982,GO:0006342	nucleosome|nucleus|DNA binding|protein heterodimerization activity|chromatin silencing	mmu04217,mmu04613,mmu05322,mmu05034	Necroptosis|Neutrophil extracellular trap formation|Systemic lupus erythematosus|Alcoholism	KOG1756	[B]	Histone 2A	Chromatin structure and dynamics	KOG1756	B	Histone H2A	Chromatin structure and dynamics	PF00125	Histone	Core histone H2A/H2B/H3/H4
D3YWQ0	Dgki	320127	Diacylglycerol kinase iota	GO:0043679,GO:0005737,GO:0005829,GO:0043197,GO:0060076,GO:0099147,GO:0098891,GO:0098978,GO:0032045,GO:0043025,GO:0005634,GO:0048471,GO:0014069,GO:0048786,GO:0032991,GO:0098685,GO:0045202,GO:0097060,GO:0008021,GO:0030672,GO:0005524,GO:0004143,GO:0005095,GO:0046872,GO:0003951,GO:0031267,GO:0046339,GO:0060079,GO:0046959,GO:0035556,GO:0046834,GO:0007269,GO:0006654,GO:0046579,GO:0007205,GO:0043087,GO:…	axon terminus|cytoplasm|cytosol|dendritic spine|excitatory synapse|extrinsic component of postsynaptic density membrane|extrinsic component of presynaptic active zone membrane|glutamatergic synapse|guanyl-nucleotide exchange factor complex|neuronal cell body|nucleus|perinuclear region of cytoplasm|postsynaptic density|presynaptic active zone|protein-containing complex|Schaffer collateral - CA1 sy…	mmu00561,mmu00564,mmu04070,mmu04072,mmu05231	Glycerolipid metabolism|Glycerophospholipid metabolism|Phosphatidylinositol signaling system|Phospholipase D signaling pathway|Choline metabolism in cancer	KOG0782	[T]	Predicted diacylglycerol kinase	Signal transduction mechanisms	KOG0782	G	diacylglycerol kinase activity	Carbohydrate transport and metabolism	PF00130	C1_1	Phorbol esters/diacylglycerol binding domain (C1 domain)
D3Z6H8	Amd2	100041585	S-adenosylmethionine decarboxylase proenzyme 2	GO:0005829,GO:0004014,GO:0042802,GO:0019810,GO:0006557,GO:0008295,GO:0006597	cytosol|adenosylmethionine decarboxylase activity|identical protein binding|putrescine binding|S-adenosylmethioninamine biosynthetic process|spermidine biosynthetic process|spermine biosynthetic process	mmu00270,mmu00330	Cysteine and methionine metabolism|Arginine and proline metabolism	KOG0788	[T]	S-adenosylmethionine decarboxylase	Signal transduction mechanisms	KOG0788	E	spermine biosynthetic process	Amino acid transport and metabolism	PF01536	SAM_decarbox	Adenosylmethionine decarboxylase
D3Z7P3	Gls	14660	Glutaminase kidney isoform, mitochondrial	GO:0005829,GO:0005759,GO:0005739,GO:0045202,GO:0004359,GO:0042802,GO:0007268,GO:0006537,GO:0090461,GO:0006543,GO:0051289,GO:0002087,GO:0001967	cytosol|mitochondrial matrix|mitochondrion|synapse|glutaminase activity|identical protein binding|chemical synaptic transmission|glutamate biosynthetic process|glutamate homeostasis|glutamine catabolic process|protein homotetramerization|regulation of respiratory gaseous exchange by nervous system process|suckling behavior	mmu00250,mmu00220,mmu00470,mmu04964,mmu04724,mmu04727,mmu05206,mmu05230	Alanine, aspartate and glutamate metabolism|Arginine biosynthesis|D-Amino acid metabolism|Proximal tubule bicarbonate reclamation|Glutamatergic synapse|GABAergic synapse|MicroRNAs in cancer|Central carbon metabolism in cancer	KOG0506	[E]	Glutaminase (contains ankyrin repeat)	Amino acid transport and metabolism	KOG0506	E	glutamine catabolic process	Amino acid transport and metabolism	PF04960	Glutaminase	Glutaminase
E2JF22	Piezo1	234839	Piezo-type mechanosensitive ion channel component 1	GO:0005783,GO:0005789,GO:0033116,GO:0016021,GO:0031258,GO:0016020,GO:0005886,GO:0005261,GO:0042802,GO:0008381,GO:0006812,GO:0071260,GO:0050982,GO:0033634,GO:0033625,GO:0010831,GO:0042391	endoplasmic reticulum|endoplasmic reticulum membrane|endoplasmic reticulum-Golgi intermediate compartment membrane|integral component of membrane|lamellipodium membrane|membrane|plasma membrane|cation channel activity|identical protein binding|mechanosensitive ion channel activity|cation transport|cellular response to mechanical stimulus|detection of mechanical stimulus|positive regulation of cel…			KOG1893	[S]	Uncharacterized conserved protein	Function unknown	KOG1893	S	mechanosensitive ion channel activity	Function unknown	PF12166	Piezo_RRas_bdg	Piezo non-specific cation channel, R-Ras-binding domain
E9PVA8	Gcn1	231659	eIF-2-alpha kinase activator GCN1	GO:0005829,GO:0005844,GO:0019901,GO:0019887,GO:0043022,GO:0034198,GO:1990253,GO:0033674,GO:0036003,GO:0006417	cytosol|polysome|protein kinase binding|protein kinase regulator activity|ribosome binding|cellular response to amino acid starvation|cellular response to leucine starvation|positive regulation of kinase activity|positive regulation of transcription from RNA polymerase II promoter in response to stress|regulation of translation			KOG1242	[J]	Protein containing adaptin N-terminal region	Translation, ribosomal structure and biogenesis	KOG1242	G	ribosome binding	Carbohydrate transport and metabolism
E9Q137	Tex264	21767	Testis-expressed protein 264 homolog	GO:0000421,GO:0031410,GO:0005829,GO:0005783,GO:0005789,GO:0016021,GO:0005634,GO:0005657,GO:0038023,GO:0106300,GO:0061709	autophagosome membrane|cytoplasmic vesicle|cytosol|endoplasmic reticulum|endoplasmic reticulum membrane|integral component of membrane|nucleus|replication fork|signaling receptor activity|protein-DNA covalent cross-linking repair|reticulophagy							ENOG502S3D1	S		Function unknown
E9Q557	Dsp	109620	Desmoplakin	GO:0016323,GO:0005911,GO:0001533,GO:0005737,GO:0005856,GO:0030057,GO:0005916,GO:0014704,GO:0016020,GO:0005886,GO:0050839,GO:0005080,GO:0097110,GO:0005198,GO:0034332,GO:0086073,GO:0098609,GO:0002934,GO:0090136,GO:0045104,GO:0045109,GO:0030216,GO:0018149,GO:0150105,GO:0086091,GO:0098911,GO:0043588,GO:0003223,GO:0042060	basolateral plasma membrane|cell-cell junction|cornified envelope|cytoplasm|cytoskeleton|desmosome|fascia adherens|intercalated disc|membrane|plasma membrane|cell adhesion molecule binding|protein kinase C binding|scaffold protein binding|structural molecule activity|adherens junction organization|bundle of His cell-Purkinje myocyte adhesion involved in cell communication|cell-cell adhesion|desmo…	mmu05412	Arrhythmogenic right ventricular cardiomyopathy	KOG0516	[Z]	Dystonin, GAS (Growth-arrest-specific protein), and related proteins	Cytoskeleton	KOG0516	Z	cytoskeletal protein binding	Cytoskeleton	PF00681	Plectin	Plectin repeat
E9Q6J5	Bod1l	665775	Biorientation of chromosomes in cell division protein 1-like 1	GO:0005813,GO:0005654,GO:0000940,GO:0005876,GO:0000922,GO:0003677,GO:0051721,GO:0004864,GO:0006974,GO:0006281,GO:0032515,GO:0031297	centrosome|nucleoplasm|outer kinetochore|spindle microtubule|spindle pole|DNA binding|protein phosphatase 2A binding|protein phosphatase inhibitor activity|cellular response to DNA damage stimulus|DNA repair|negative regulation of phosphoprotein phosphatase activity|replication fork processing							ENOG502QTHP	S	replication fork processing	Function unknown	PF05205	COMPASS-Shg1	COMPASS (Complex proteins associated with Set1p) component shg1
E9Q912	Rap1gds1	229877	Rap1 GTPase-GDP dissociation stimulator 1	GO:0005829,GO:0005783,GO:0005739,GO:0005096,GO:0031034,GO:0032471,GO:0043547,GO:0051561,GO:0014829	cytosol|endoplasmic reticulum|mitochondrion|GTPase activator activity|myosin filament assembly|negative regulation of endoplasmic reticulum calcium ion concentration|positive regulation of GTPase activity|positive regulation of mitochondrial calcium ion concentration|vascular associated smooth muscle contraction			KOG4500	[T]	Rho/Rac GTPase guanine nucleotide exchange factor smgGDS/Vimar	Signal transduction mechanisms	KOG4500	S	small GTPase mediated signal transduction	Function unknown	PF00514	Arm	Armadillo/beta-catenin-like repeat
F6ZDS4	Tpr	108989	Nucleoprotein TPR	GO:0005737,GO:0005868,GO:0019898,GO:0000776,GO:0072686,GO:0005635,GO:0042405,GO:0031965,GO:0034399,GO:0005643,GO:0044615,GO:0005634,GO:0003682,GO:0070840,GO:0031072,GO:0051019,GO:0003729,GO:0042803,GO:0017056,GO:0015631,GO:0051301,GO:0034605,GO:0035457,GO:0007094,GO:0006406,GO:0031990,GO:0046832,GO:0000122,GO:0045947,GO:0006999,GO:0031453,GO:0090316,GO:0090267,GO:0046827,GO:0042307,GO:0006611,GO:…	cytoplasm|cytoplasmic dynein complex|extrinsic component of membrane|kinetochore|mitotic spindle|nuclear envelope|nuclear inclusion body|nuclear membrane|nuclear periphery|nuclear pore|nuclear pore nuclear basket|nucleus|chromatin binding|dynein complex binding|heat shock protein binding|mitogen-activated protein kinase binding|mRNA binding|protein homodimerization activity|structural constituent…	mmu03013,mmu05200,mmu05216,mmu05014	Nucleocytoplasmic transport|Pathways in cancer|Thyroid cancer|Amyotrophic lateral sclerosis	KOG4674	[S]	Uncharacterized conserved coiled-coil protein	Function unknown	KOG4674	S	spindle assembly checkpoint	Function unknown	PF07926	TPR_MLP1_2	TPR/MLP1/MLP2-like protein
F8VPU2	Farp1	223254	FERM, ARHGEF and pleckstrin domain-containing protein 1	GO:0005856,GO:0005829,GO:0030425,GO:0043197,GO:0031234,GO:0098890,GO:0030175,GO:0098978,GO:0008092,GO:0005085,GO:0031267,GO:0048813,GO:0098974,GO:1905606,GO:0098942,GO:0007416	cytoskeleton|cytosol|dendrite|dendritic spine|extrinsic component of cytoplasmic side of plasma membrane|extrinsic component of postsynaptic membrane|filopodium|glutamatergic synapse|cytoskeletal protein binding|guanyl-nucleotide exchange factor activity|small GTPase binding|dendrite morphogenesis|postsynaptic actin cytoskeleton organization|regulation of presynapse assembly|retrograde trans-syna…			KOG3531	[T]	Rho guanine nucleotide exchange factor CDEP	Signal transduction mechanisms	KOG3531	T	Rho guanyl-nucleotide exchange factor activity	Signal transduction mechanisms	PF00169	PH	PH domain
G3X9C2	Nccrp1	233038	F-box only protein 50	GO:0005737,GO:0019005,GO:0006516,GO:0008284,GO:0016567,GO:0031146,GO:0030433	cytoplasm|SCF ubiquitin ligase complex|glycoprotein catabolic process|positive regulation of cell population proliferation|protein ubiquitination|SCF-dependent proteasomal ubiquitin-dependent protein catabolic process|ubiquitin-dependent ERAD pathway							KOG3248	B	cell proliferation in dorsal spinal cord	Chromatin structure and dynamics	PF04300	FBA	F-box associated region
G5E829	Atp2b1	67972	Plasma membrane calcium-transporting ATPase 1	GO:0045177,GO:0016324,GO:0016323,GO:0009898,GO:0032590,GO:0032591,GO:0098982,GO:0098978,GO:0001772,GO:0005887,GO:0099059,GO:0099056,GO:0030285,GO:0043231,GO:0045121,GO:0032809,GO:0005654,GO:0005886,GO:0005524,GO:0140603,GO:0019829,GO:0015085,GO:0005516,GO:0046872,GO:0005388,GO:1905056,GO:0030165,GO:0007568,GO:0007420,GO:1901660,GO:1990034,GO:0006816,GO:0006874,GO:0071386,GO:0071305,GO:0001818,GO:…	apical part of cell|apical plasma membrane|basolateral plasma membrane|cytoplasmic side of plasma membrane|dendrite membrane|dendritic spine membrane|GABA-ergic synapse|glutamatergic synapse|immunological synapse|integral component of plasma membrane|integral component of presynaptic active zone membrane|integral component of presynaptic membrane|integral component of synaptic vesicle membrane|in…	mmu04020,mmu04024,mmu04022,mmu04925,mmu04261,mmu04970,mmu04972,mmu04978,mmu04961	Calcium signaling pathway|cAMP signaling pathway|cGMP-PKG signaling pathway|Aldosterone synthesis and secretion|Adrenergic signaling in cardiomyocytes|Salivary secretion|Pancreatic secretion|Mineral absorption|Endocrine and other factor-regulated calcium reabsorption	KOG0204	[P]	Calcium transporting ATPase	Inorganic ion transport and metabolism	KOG0204	P	calcium-transporting ATPase activity	Inorganic ion transport and metabolism	PF00122	E1-E2_ATPase	E1-E2 ATPase
G5E8V9	Arfip1	99889	Arfaptin-1	GO:0005829,GO:0000139,GO:0032588,GO:0070273,GO:0005543,GO:0019904,GO:0006886,GO:1905280,GO:0034315,GO:0050708	cytosol|Golgi membrane|trans-Golgi network membrane|phosphatidylinositol-4-phosphate binding|phospholipid binding|protein domain specific binding|intracellular protein transport|negative regulation of retrograde transport, endosome to Golgi|regulation of Arp2/3 complex-mediated actin nucleation|regulation of protein secretion			KOG3876	[T]	Arfaptin and related proteins	Signal transduction mechanisms	KOG3876	S	regulation of Arp2/3 complex-mediated actin nucleation	Function unknown	PF06456	Arfaptin	Arfaptin-like domain
O08528	Hk2	15277	Hexokinase-2	GO:0005813,GO:0005829,GO:0043231,GO:0005741,GO:0005739,GO:0005886,GO:0016529,GO:0005524,GO:0008865,GO:0004340,GO:0005536,GO:0004396,GO:0019158,GO:0008637,GO:0046835,GO:0001678,GO:1990830,GO:0072655,GO:0006002,GO:0051156,GO:0006006,GO:0006096,GO:0007595,GO:0072656,GO:0035795,GO:2000378,GO:0045766,GO:1904925,GO:0046324,GO:0001666,GO:0002931	centrosome|cytosol|intracellular membrane-bounded organelle|mitochondrial outer membrane|mitochondrion|plasma membrane|sarcoplasmic reticulum|ATP binding|fructokinase activity|glucokinase activity|glucose binding|hexokinase activity|mannokinase activity|apoptotic mitochondrial changes|carbohydrate phosphorylation|cellular glucose homeostasis|cellular response to leukemia inhibitory factor|establi…	mmu00010,mmu00051,mmu00052,mmu00500,mmu00520,mmu00524,mmu04066,mmu04910,mmu04973,mmu05230,mmu04930	Glycolysis / Gluconeogenesis|Fructose and mannose metabolism|Galactose metabolism|Starch and sucrose metabolism|Amino sugar and nucleotide sugar metabolism|Neomycin, kanamycin and gentamicin biosynthesis|HIF-1 signaling pathway|Insulin signaling pathway|Carbohydrate digestion and absorption|Central carbon metabolism in cancer|Type II diabetes mellitus	KOG1369	[G]	Hexokinase	Carbohydrate transport and metabolism	KOG1369	G	glucose binding	Carbohydrate transport and metabolism	PF00349	Hexokinase_1	Hexokinase
O08529	Capn2	12334	Calpain-2 catalytic subunit	GO:0042995,GO:0000785,GO:0005737,GO:0005829,GO:0030425,GO:0005783,GO:0009897,GO:0005925,GO:0005794,GO:0005764,GO:0016020,GO:0045121,GO:0005758,GO:0043025,GO:0005634,GO:0097038,GO:0005886,GO:0031143,GO:0005509,GO:0004198,GO:0008092,GO:0019899,GO:0008233,GO:0044877,GO:0048266,GO:0001824,GO:0071230,GO:0035458,GO:0071222,GO:0007565,GO:0007520,GO:0010666,GO:1901741,GO:1901216,GO:2001247,GO:0016540,GO:…	cell projection|chromatin|cytoplasm|cytosol|dendrite|endoplasmic reticulum|external side of plasma membrane|focal adhesion|Golgi apparatus|lysosome|membrane|membrane raft|mitochondrial intermembrane space|neuronal cell body|nucleus|perinuclear endoplasmic reticulum|plasma membrane|pseudopodium|calcium ion binding|calcium-dependent cysteine-type endopeptidase activity|cytoskeletal protein binding|…	mmu04141,mmu04210,mmu04217,mmu04218,mmu04510,mmu05010,mmu05022	Protein processing in endoplasmic reticulum|Apoptosis|Necroptosis|Cellular senescence|Focal adhesion|Alzheimer disease|Pathways of neurodegeneration - multiple diseases	KOG0045	[OT]	Cytosolic Ca2+-dependent cysteine protease (calpain), large subunit (EF-Hand protein superfamily)	Posttranslational modification, protein turnover, chaperones |Signal transduction mechanisms	KOG0045	O	calcium-dependent cysteine-type endopeptidase activity	Posttranslational modification, protein turnover, chaperones	PF00648	Peptidase_C2	Calpain family cysteine protease
O08547	Sec22b	20333	Vesicle-trafficking protein SEC22b	GO:0030137,GO:0005789,GO:0005793,GO:0033116,GO:0012507,GO:0000139,GO:0016021,GO:0042470,GO:0031201,GO:0008021,GO:0005484,GO:0019905,GO:0006888,GO:1902902,GO:0045732,GO:0015031,GO:0006890,GO:0048280,GO:0016192	COPI-coated vesicle|endoplasmic reticulum membrane|endoplasmic reticulum-Golgi intermediate compartment|endoplasmic reticulum-Golgi intermediate compartment membrane|ER to Golgi transport vesicle membrane|Golgi membrane|integral component of membrane|melanosome|SNARE complex|synaptic vesicle|SNAP receptor activity|syntaxin binding|endoplasmic reticulum to Golgi vesicle-mediated transport|negative…	mmu04130,mmu04145,mmu05134	SNARE interactions in vesicular transport|Phagosome|Legionellosis	KOG0862	[U]	Synaptobrevin/VAMP-like protein SEC22	Intracellular trafficking, secretion, and vesicular transport	KOG0862	U	vesicle fusion with Golgi apparatus	Intracellular trafficking, secretion, and vesicular transport	PF00957	Synaptobrevin	Synaptobrevin
O08553	Dpysl2	12934	Dihydropyrimidinase-related protein 2	GO:0030424,GO:0005856,GO:0005829,GO:0030425,GO:0030426,GO:0005739,GO:0043209,GO:0043005,GO:0043025,GO:0005886,GO:0098793,GO:0032991,GO:0043195,GO:0016810,GO:0042802,GO:0008017,GO:0019901,GO:0007411,GO:0007010,GO:0006897,GO:0021772,GO:0014049,GO:0030516,GO:0045664,GO:0010975,GO:0001975,GO:0042220,GO:0042493,GO:0021510,GO:0048489	axon|cytoskeleton|cytosol|dendrite|growth cone|mitochondrion|myelin sheath|neuron projection|neuronal cell body|plasma membrane|presynapse|protein-containing complex|terminal bouton|hydrolase activity, acting on carbon-nitrogen (but not peptide) bonds|identical protein binding|microtubule binding|protein kinase binding|axon guidance|cytoskeleton organization|endocytosis|olfactory bulb development…	mmu04360	Axon guidance	KOG2584	[F]	Dihydroorotase and related enzymes	Nucleotide transport and metabolism	KOG2584	F	hydrolase activity, acting on carbon-nitrogen (but not peptide) bonds	Nucleotide transport and metabolism	PF01979	Amidohydro_1	Amidohydrolase family
O08579	Emd	13726	Emerin	GO:0032541,GO:0005737,GO:0005783,GO:0016021,GO:0005874,GO:0005635,GO:0005637,GO:0005652,GO:0031965,GO:0005640,GO:0005654,GO:0005634,GO:0005819,GO:0031616,GO:0003779,GO:0048487,GO:0071363,GO:0090090,GO:0048147,GO:0071763,GO:0046827,GO:0060828,GO:0035914	cortical endoplasmic reticulum|cytoplasm|endoplasmic reticulum|integral component of membrane|microtubule|nuclear envelope|nuclear inner membrane|nuclear lamina|nuclear membrane|nuclear outer membrane|nucleoplasm|nucleus|spindle|spindle pole centrosome|actin binding|beta-tubulin binding|cellular response to growth factor stimulus|negative regulation of canonical Wnt signaling pathway|negative reg…	mmu05410,mmu05412,mmu05414	Hypertrophic cardiomyopathy|Arrhythmogenic right ventricular cardiomyopathy|Dilated cardiomyopathy					ENOG502S5SJ	S	Stabilizes and promotes the formation of a nuclear actin cortical network. Stimulates actin polymerization in vitro by binding and stabilizing the pointed end of growing filaments. Inhibits beta-catenin activity by preventing its accumulation in the nucleus. Acts by influencing the nuclear accumulation of beta- catenin through a CRM1-dependent export pathway. Links centrosomes to the nuclear enve…	Function unknown	PF03020	LEM	LEM domain
O08583	Alyref	21681	THO complex subunit 4	GO:0005737,GO:0016607,GO:0005634,GO:0005681,GO:0062153,GO:0003723,GO:0003697,GO:0006397,GO:0051028,GO:0006405,GO:0008380	cytoplasm|nuclear speck|nucleus|spliceosomal complex|C5-methylcytidine-containing RNA binding|RNA binding|single-stranded DNA binding|mRNA processing|mRNA transport|RNA export from nucleus|RNA splicing	mmu03040,mmu03013,mmu03015,mmu05168,mmu05014	Spliceosome|Nucleocytoplasmic transport|mRNA surveillance pathway|Herpes simplex virus 1 infection|Amyotrophic lateral sclerosis	KOG0533	[A]	RRM motif-containing protein	RNA processing and modification	KOG0533	I	mRNA transport	Lipid transport and metabolism	PF00076	RRM_1	RNA recognition motif. (a.k.a. RRM, RBD, or RNP domain)
O08585	Clta	12757	Clathrin light chain A	GO:0030118,GO:0030132,GO:0030130,GO:0071439,GO:0030125,GO:0005905,GO:0030136,GO:0031410,GO:0098978,GO:0005886,GO:0098843,GO:0099631,GO:0098835,GO:0005819,GO:0030672,GO:0032050,GO:0051020,GO:0042277,GO:0044877,GO:0005198,GO:0007049,GO:0051301,GO:0048268,GO:0072583,GO:0006886	clathrin coat|clathrin coat of coated pit|clathrin coat of trans-Golgi network vesicle|clathrin complex|clathrin vesicle coat|clathrin-coated pit|clathrin-coated vesicle|cytoplasmic vesicle|glutamatergic synapse|plasma membrane|postsynaptic endocytic zone|postsynaptic endocytic zone cytoplasmic component|presynaptic endocytic zone membrane|spindle|synaptic vesicle membrane|clathrin heavy chain bi…	mmu04144,mmu04142,mmu04961,mmu04721,mmu05100,mmu05016	Endocytosis|Lysosome|Endocrine and other factor-regulated calcium reabsorption|Synaptic vesicle cycle|Bacterial invasion of epithelial cells|Huntington disease	KOG4031	[U]	Vesicle coat protein clathrin, light chain	Intracellular trafficking, secretion, and vesicular transport	KOG4031	U	clathrin heavy chain binding	Intracellular trafficking, secretion, and vesicular transport	PF01086	Clathrin_lg_ch	Clathrin light chain
O08599	Stxbp1	20910	Syntaxin-binding protein 1	GO:0030424,GO:0005737,GO:0005856,GO:0005829,GO:0098891,GO:0098978,GO:0005739,GO:0043209,GO:0005654,GO:0005634,GO:0048471,GO:0045335,GO:0005886,GO:0031091,GO:0098794,GO:0098793,GO:0048787,GO:0032991,GO:0030141,GO:0042802,GO:0043274,GO:0019904,GO:0019901,GO:0047485,GO:0000149,GO:0019905,GO:0017075,GO:0007412,GO:0071346,GO:0003006,GO:0006887,GO:0006886,GO:0060292,GO:0043524,GO:0031333,GO:0032229,GO:…	axon|cytoplasm|cytoskeleton|cytosol|extrinsic component of presynaptic active zone membrane|glutamatergic synapse|mitochondrion|myelin sheath|nucleoplasm|nucleus|perinuclear region of cytoplasm|phagocytic vesicle|plasma membrane|platelet alpha granule|postsynapse|presynapse|presynaptic active zone membrane|protein-containing complex|secretory granule|identical protein binding|phospholipase bindin…	mmu04721	Synaptic vesicle cycle	KOG1300	[U]	Vesicle trafficking protein Sec1	Intracellular trafficking, secretion, and vesicular transport	KOG1300	U	vesicle docking involved in exocytosis	Intracellular trafficking, secretion, and vesicular transport	PF00995	Sec1	Sec1 family
O08663	Metap2	56307	Methionine aminopeptidase 2	GO:0005737,GO:0005829,GO:0005886,GO:0004177,GO:0046872,GO:0070006,GO:0008235,GO:0031365,GO:0018206,GO:0070084,GO:0016485	cytoplasm|cytosol|plasma membrane|aminopeptidase activity|metal ion binding|metalloaminopeptidase activity|metalloexopeptidase activity|N-terminal protein amino acid modification|peptidyl-methionine modification|protein initiator methionine removal|protein processing			KOG2775	[R]	Metallopeptidase	General function prediction only	KOG2775	J	metalloexopeptidase activity	Translation, ribosomal structure and biogenesis	PF00557	Peptidase_M24	Metallopeptidase family M24
O08709	Prdx6	11758	Peroxiredoxin-6	GO:0005737,GO:0005829,GO:0005764,GO:0005739,GO:0005634,GO:0048471,GO:0047184,GO:0047499,GO:0004602,GO:0042802,GO:0004601,GO:0051920,GO:0004623,GO:0102567,GO:0102568,GO:0031625,GO:0032060,GO:0045454,GO:0098869,GO:0046475,GO:0042744,GO:0048026,GO:0006979,GO:0000302	cytoplasm|cytosol|lysosome|mitochondrion|nucleus|perinuclear region of cytoplasm|1-acylglycerophosphocholine O-acyltransferase activity|calcium-independent phospholipase A2 activity|glutathione peroxidase activity|identical protein binding|peroxidase activity|peroxiredoxin activity|phospholipase A2 activity|phospholipase A2 activity (consuming 1,2-dipalmitoylphosphatidylcholine)|phospholipase A2 …	mmu00480	Glutathione metabolism	KOG0854	[O]	Alkyl hydroperoxide reductase, thiol specific antioxidant and related enzymes	Posttranslational modification, protein turnover, chaperones	KOG0854	O	peroxiredoxin activity	Posttranslational modification, protein turnover, chaperones	PF00578	AhpC-TSA	AhpC/TSA family
O08749	Dld	13382	Dihydrolipoyl dehydrogenase, mitochondrial	GO:0043159,GO:0005929,GO:0005759,GO:0005739,GO:0031514,GO:0043209,GO:0005634,GO:0045252,GO:0045254,GO:0004148,GO:0050660,GO:0043544,GO:0051287,GO:0034604,GO:0006103,GO:0006086,GO:0007568,GO:0045454,GO:0051068,GO:0007369,GO:0106077,GO:0009106,GO:0061732,GO:0006120,GO:0006508,GO:0042391,GO:0048240	acrosomal matrix|cilium|mitochondrial matrix|mitochondrion|motile cilium|myelin sheath|nucleus|oxoglutarate dehydrogenase complex|pyruvate dehydrogenase complex|dihydrolipoyl dehydrogenase activity|flavin adenine dinucleotide binding|lipoamide binding|NAD binding|pyruvate dehydrogenase (NAD+) activity|2-oxoglutarate metabolic process|acetyl-CoA biosynthetic process from pyruvate|aging|cell redox …	mmu00010,mmu00020,mmu00620,mmu00630,mmu00640,mmu00260,mmu00280,mmu00310,mmu00380	Glycolysis / Gluconeogenesis|Citrate cycle (TCA cycle)|Pyruvate metabolism|Glyoxylate and dicarboxylate metabolism|Propanoate metabolism|Glycine, serine and threonine metabolism|Valine, leucine and isoleucine degradation|Lysine degradation|Tryptophan metabolism	KOG1335	[C]	Dihydrolipoamide dehydrogenase	Energy production and conversion	KOG1335	C	dihydrolipoyl dehydrogenase activity	Energy production and conversion	PF02852	Pyr_redox_dim	Pyridine nucleotide-disulphide oxidoreductase, dimerisation domain
O08756	Hsd17b10	15108	3-hydroxyacyl-CoA dehydrogenase type-2	GO:0005783,GO:0005743,GO:0042645,GO:0030678,GO:0005739,GO:0044594,GO:0047015,GO:0003857,GO:0018454,GO:0001540,GO:0047044,GO:0106281,GO:0008709,GO:0004303,GO:0030331,GO:0042802,GO:0106282,GO:0051287,GO:0005496,GO:0047035,GO:0030283,GO:0000049,GO:0106283,GO:0008209,GO:0006699,GO:0062173,GO:0008207,GO:0008210,GO:0006635,GO:0006550,GO:1990180,GO:0097745,GO:0070901,GO:0007005,GO:0051289	endoplasmic reticulum|mitochondrial inner membrane|mitochondrial nucleoid|mitochondrial ribonuclease P complex|mitochondrion|17-beta-hydroxysteroid dehydrogenase (NAD+) activity|3-hydroxy-2-methylbutyryl-CoA dehydrogenase activity|3-hydroxyacyl-CoA dehydrogenase activity|acetoacetyl-CoA reductase activity|amyloid-beta binding|androstan-3-alpha,17-beta-diol dehydrogenase activity|chenodeoxycholate…	mmu00280,mmu05010,mmu05022	Valine, leucine and isoleucine degradation|Alzheimer disease|Pathways of neurodegeneration - multiple diseases	KOG1199	[Q]	Short-chain alcohol dehydrogenase/3-hydroxyacyl-CoA dehydrogenase	Secondary metabolites biosynthesis, transport and catabolism	KOG1199	I	3-hydroxy-2-methylbutyryl-CoA dehydrogenase activity	Lipid transport and metabolism	PF00106	adh_short	short chain dehydrogenase
O08784	Tcof1	21453	Treacle protein	GO:0005829,GO:0001650,GO:0005730,GO:0005654,GO:0046982,GO:0030674,GO:0097110,GO:0014032,GO:0014029,GO:0042790,GO:0006417	cytosol|fibrillar center|nucleolus|nucleoplasm|protein heterodimerization activity|protein-macromolecule adaptor activity|scaffold protein binding|neural crest cell development|neural crest formation|nucleolar large rRNA transcription by RNA polymerase I|regulation of translation	mmu03008	Ribosome biogenesis in eukaryotes					ENOG502S41N	S	RNA polymerase I core binding	Function unknown	PF03546	Treacle	Treacher Collins syndrome protein Treacle
O08795	Prkcsh	19089	Glucosidase 2 subunit beta	GO:0005783,GO:0017177,GO:0043231,GO:0005509,GO:0051219,GO:0005080,GO:0044877,GO:0003723,GO:0044325,GO:0001701,GO:0001889,GO:0006491,GO:0010977,GO:0006807	endoplasmic reticulum|glucosidase II complex|intracellular membrane-bounded organelle|calcium ion binding|phosphoprotein binding|protein kinase C binding|protein-containing complex binding|RNA binding|transmembrane transporter binding|in utero embryonic development|liver development|N-glycan processing|negative regulation of neuron projection development|nitrogen compound metabolic process	mmu04141	Protein processing in endoplasmic reticulum	KOG2397	[T]	Protein kinase C substrate, 80 KD protein, heavy chain	Signal transduction mechanisms	KOG2397	S	N-glycan processing	Function unknown	PF07915	PRKCSH	Glucosidase II beta subunit-like protein
O08807	Prdx4	53381	Peroxiredoxin-4	GO:0005737,GO:0005829,GO:0005783,GO:0005615,GO:0005739,GO:0005790,GO:0042802,GO:0004601,GO:0051920,GO:0045454,GO:0030198,GO:0008584,GO:2000255,GO:0018401,GO:0022417,GO:0072593,GO:0006979,GO:0007283	cytoplasm|cytosol|endoplasmic reticulum|extracellular space|mitochondrion|smooth endoplasmic reticulum|identical protein binding|peroxidase activity|peroxiredoxin activity|cell redox homeostasis|extracellular matrix organization|male gonad development|negative regulation of male germ cell proliferation|peptidyl-proline hydroxylation to 4-hydroxy-L-proline|protein maturation by protein folding|rea…			KOG0852	[O]	Alkyl hydroperoxide reductase, thiol specific antioxidant and related enzymes	Posttranslational modification, protein turnover, chaperones	KOG0852	O	peroxiredoxin activity	Posttranslational modification, protein turnover, chaperones	PF00578	AhpC-TSA	AhpC/TSA family
O08810	Eftud2	20624	116 kDa U5 small nuclear ribonucleoprotein component	GO:0015030,GO:0071013,GO:0005829,GO:0043231,GO:0016607,GO:0005654,GO:0005634,GO:1990904,GO:0071007,GO:0071005,GO:0046540,GO:0005525,GO:0003924,GO:0030623,GO:0000398	Cajal body|catalytic step 2 spliceosome|cytosol|intracellular membrane-bounded organelle|nuclear speck|nucleoplasm|nucleus|ribonucleoprotein complex|U2-type catalytic step 2 spliceosome|U2-type precatalytic spliceosome|U4/U6 x U5 tri-snRNP complex|GTP binding|GTPase activity|U5 snRNA binding|mRNA splicing, via spliceosome	mmu03040	Spliceosome	KOG0468	[J]	U5 snRNP-specific protein	Translation, ribosomal structure and biogenesis	KOG0468	J	GTPase activity	Translation, ribosomal structure and biogenesis	PF00009	GTP_EFTU	Elongation factor Tu GTP binding domain
O08852	Pkd1	18763	Polycystin-1	GO:0016323,GO:0034704,GO:0034703,GO:0009986,GO:0005929,GO:0005737,GO:0005783,GO:0070062,GO:0005794,GO:0005887,GO:0016328,GO:0016020,GO:0031514,GO:0005634,GO:0005886,GO:0002133,GO:0005262,GO:0030246,GO:0005261,GO:0019904,GO:0019901,GO:0044325,GO:0042813,GO:0001568,GO:0048754,GO:0070588,GO:0006816,GO:0001502,GO:0098609,GO:0198738,GO:0042994,GO:0050982,GO:0048565,GO:0001892,GO:0030010,GO:0048806,GO:…	basolateral plasma membrane|calcium channel complex|cation channel complex|cell surface|cilium|cytoplasm|endoplasmic reticulum|extracellular exosome|Golgi apparatus|integral component of plasma membrane|lateral plasma membrane|membrane|motile cilium|nucleus|plasma membrane|polycystin complex|calcium channel activity|carbohydrate binding|cation channel activity|protein domain specific binding|prot…			KOG3599	[PT]	Ca2+-modulated nonselective cation channel polycystin	Inorganic ion transport and metabolism |Signal transduction mechanisms	KOG3599	S	detection of mechanical stimulus	Function unknown	PF00059	Lectin_C	Lectin C-type domain
O08915	Aip	11632	AH receptor-interacting protein	GO:0034751,GO:0005829,GO:0016020,GO:0005886,GO:0017162,GO:0036004,GO:0003755,GO:0003712,GO:0051082,GO:0051344,GO:0022417,GO:0006626,GO:0010738,GO:0006805	aryl hydrocarbon receptor complex|cytosol|membrane|plasma membrane|aryl hydrocarbon receptor binding|GAF domain binding|peptidyl-prolyl cis-trans isomerase activity|transcription coregulator activity|unfolded protein binding|negative regulation of cyclic-nucleotide phosphodiesterase activity|protein maturation by protein folding|protein targeting to mitochondrion|regulation of protein kinase A si…	mmu05207,mmu04934	Chemical carcinogenesis - receptor activation|Cushing syndrome	KOG0545	[O]	Aryl-hydrocarbon receptor-interacting protein	Posttranslational modification, protein turnover, chaperones	KOG0545	O	farnesylated protein binding	Posttranslational modification, protein turnover, chaperones	PF00254	FKBP_C	FKBP-type peptidyl-prolyl cis-trans isomerase
O08917	Flot1	14251	Flotillin-1	GO:0005912,GO:0016323,GO:0005901,GO:0044291,GO:0005911,GO:0034451,GO:0008180,GO:0030864,GO:0031410,GO:0098691,GO:0005769,GO:0005768,GO:0009897,GO:0016600,GO:0098982,GO:0098978,GO:0030027,GO:0042470,GO:0016020,GO:0045121,GO:0005815,GO:0005886,GO:0044853,GO:0098793,GO:0048786,GO:0042383,GO:0045202,GO:0001931,GO:0035255,GO:0002020,GO:0007411,GO:0007409,GO:0071360,GO:0033227,GO:0006897,GO:0022617,GO:…	adherens junction|basolateral plasma membrane|caveola|cell-cell contact zone|cell-cell junction|centriolar satellite|COP9 signalosome|cortical actin cytoskeleton|cytoplasmic vesicle|dopaminergic synapse|early endosome|endosome|external side of plasma membrane|flotillin complex|GABA-ergic synapse|glutamatergic synapse|lamellipodium|melanosome|membrane|membrane raft|microtubule organizing center|pl…	mmu04910	Insulin signaling pathway	KOG2668	[UZ]	Flotillins	Intracellular trafficking, secretion, and vesicular transport |Cytoskeleton	KOG2668	U	protein localization to membrane raft	Intracellular trafficking, secretion, and vesicular transport	PF01145	Band_7	SPFH domain / Band 7 family
O08997	Atox1	11927	Copper transport protein ATOX1	GO:0005829,GO:0051117,GO:0016531,GO:0005507,GO:0032767,GO:1903136,GO:0006878,GO:0060003,GO:0006825,GO:0043066,GO:0006979	cytosol|ATPase binding|copper chaperone activity|copper ion binding|copper-dependent protein binding|cuprous ion binding|cellular copper ion homeostasis|copper ion export|copper ion transport|negative regulation of apoptotic process|response to oxidative stress	mmu04978	Mineral absorption	KOG1603	[P]	Copper chaperone	Inorganic ion transport and metabolism	KOG1603	O	cellular transition metal ion homeostasis	Posttranslational modification, protein turnover, chaperones	PF00403	HMA	Heavy-metal-associated domain
O09005	Degs1	13244	Sphingolipid delta(4)-desaturase DES1	GO:0005789,GO:0016021,GO:0031966,GO:0005739,GO:0050251,GO:0042284,GO:0046513,GO:0006633,GO:0043217,GO:0043065	endoplasmic reticulum membrane|integral component of membrane|mitochondrial membrane|mitochondrion|retinol isomerase activity|sphingolipid delta-4 desaturase activity|ceramide biosynthetic process|fatty acid biosynthetic process|myelin maintenance|positive regulation of apoptotic process	mmu00600,mmu04071	Sphingolipid metabolism|Sphingolipid signaling pathway	KOG2987	[I]	Fatty acid desaturase	Lipid transport and metabolism	KOG2987	S	sphingolipid delta-4 desaturase activity	Function unknown	PF00487	FA_desaturase	Fatty acid desaturase
O09053	Wrn	22427	Werner syndrome ATP-dependent helicase homolog	GO:0005813,GO:0005694,GO:0000781,GO:0005737,GO:0043005,GO:0016607,GO:0005730,GO:0005654,GO:0005634,GO:0005657,GO:0043138,GO:0008408,GO:0070337,GO:1905773,GO:0005524,GO:0140603,GO:0000405,GO:0003682,GO:0003677,GO:0003678,GO:0004527,GO:0061749,GO:0000400,GO:0009378,GO:0051880,GO:0004386,GO:0000287,GO:0030145,GO:0032405,GO:0042803,GO:0044877,GO:0061821,GO:0000403,GO:0006284,GO:0007420,GO:0007569,GO:…	centrosome|chromosome|chromosome, telomeric region|cytoplasm|neuron projection|nuclear speck|nucleolus|nucleoplasm|nucleus|replication fork|3'-5' DNA helicase activity|3'-5' exonuclease activity|3'-flap-structured DNA binding|8-hydroxy-2'-deoxyguanosine DNA binding|ATP binding|ATP hydrolysis activity|bubble DNA binding|chromatin binding|DNA binding|DNA helicase activity|exonuclease activity|forke…			KOG0351	[L]	ATP-dependent DNA helicase	Replication, recombination and repair	KOG0351	L	four-way junction helicase activity	Replication, recombination and repair	PF00270	DEAD	DEAD/DEAH box helicase
O09061	Psmb1	19170	Proteasome subunit beta type-1	GO:0005737,GO:0005829,GO:0005654,GO:0005634,GO:0000502,GO:0005839,GO:0019774,GO:0004175,GO:0004298,GO:0010499,GO:0043161	cytoplasm|cytosol|nucleoplasm|nucleus|proteasome complex|proteasome core complex|proteasome core complex, beta-subunit complex|endopeptidase activity|threonine-type endopeptidase activity|proteasomal ubiquitin-independent protein catabolic process|proteasome-mediated ubiquitin-dependent protein catabolic process	mmu03050,mmu05010,mmu05012,mmu05014,mmu05016,mmu05017,mmu05020,mmu05022	Proteasome|Alzheimer disease|Parkinson disease|Amyotrophic lateral sclerosis|Huntington disease|Spinocerebellar ataxia|Prion disease|Pathways of neurodegeneration - multiple diseases	KOG0179	[O]	20S proteasome, regulatory subunit beta type PSMB1/PRE7	Posttranslational modification, protein turnover, chaperones	KOG0179	O	threonine-type endopeptidase activity	Posttranslational modification, protein turnover, chaperones	PF00227	Proteasome	Proteasome subunit
O09117	Sypl1	19027	Synaptophysin-like protein 1	GO:0030285,GO:0042470,GO:0016020,GO:0030141,GO:0030672,GO:0017075	integral component of synaptic vesicle membrane|melanosome|membrane|secretory granule|synaptic vesicle membrane|syntaxin-1 binding							ENOG502RY2D	S	Membrane-associating domain	Function unknown	PF01284	MARVEL	Membrane-associating domain
O09131	Gsto1	14873	Glutathione S-transferase omega-1	GO:0030424,GO:0005604,GO:0044297,GO:0005737,GO:0005829,GO:0043209,GO:0031965,GO:0005654,GO:0045174,GO:0004364,GO:0050610,GO:0016491,GO:0071243,GO:0006749,GO:0019853,GO:0019852,GO:0060315,GO:0060316,GO:0010880,GO:0042178	axon|basement membrane|cell body|cytoplasm|cytosol|myelin sheath|nuclear membrane|nucleoplasm|glutathione dehydrogenase (ascorbate) activity|glutathione transferase activity|methylarsonate reductase activity|oxidoreductase activity|cellular response to arsenic-containing substance|glutathione metabolic process|L-ascorbic acid biosynthetic process|L-ascorbic acid metabolic process|negative regulat…	mmu00480,mmu00980,mmu00982,mmu00983,mmu05200,mmu05204,mmu05207,mmu05208,mmu05225,mmu05418,mmu01524	Glutathione metabolism|Metabolism of xenobiotics by cytochrome P450|Drug metabolism - cytochrome P450|Drug metabolism - other enzymes|Pathways in cancer|Chemical carcinogenesis - DNA adducts|Chemical carcinogenesis - receptor activation|Chemical carcinogenesis - reactive oxygen species|Hepatocellular carcinoma|Fluid shear stress and atherosclerosis|Platinum drug resistance	KOG0406	[O]	Glutathione S-transferase	Posttranslational modification, protein turnover, chaperones	KOG0406	O	glutathione transferase activity	Posttranslational modification, protein turnover, chaperones	PF00043	GST_C	Glutathione S-transferase, C-terminal domain
O09159	Man2b1	17159	Lysosomal alpha-mannosidase	GO:0005615,GO:0043231,GO:0005764,GO:0005654,GO:0005774,GO:0004559,GO:0005537,GO:0046872,GO:0006464,GO:0007611,GO:0006013	extracellular space|intracellular membrane-bounded organelle|lysosome|nucleoplasm|vacuolar membrane|alpha-mannosidase activity|mannose binding|metal ion binding|cellular protein modification process|learning or memory|mannose metabolic process	mmu00511,mmu04142	Other glycan degradation|Lysosome	KOG1959	[G]	Glycosyl hydrolase, family 38 - alpha-mannosidase	Carbohydrate transport and metabolism	KOG1959	G	mannose metabolic process	Carbohydrate transport and metabolism	PF01074	Glyco_hydro_38N	Glycosyl hydrolases family 38 N-terminal domain
O09167	Rpl21	19933	60S ribosomal protein L21	GO:0005829,GO:0022625,GO:0022626,GO:0005783,GO:0005840,GO:0003735,GO:0006412	cytosol|cytosolic large ribosomal subunit|cytosolic ribosome|endoplasmic reticulum|ribosome|structural constituent of ribosome|translation	mmu03010,mmu05171	Ribosome|Coronavirus disease - COVID-19	KOG1732	[J]	60S ribosomal protein L21	Translation, ribosomal structure and biogenesis	KOG1732	J	structural constituent of ribosome	Translation, ribosomal structure and biogenesis	PF01157	Ribosomal_L21e	Ribosomal protein L21e
O09172	Gclm	14630	Glutamate--cysteine ligase regulatory subunit	GO:0017109,GO:0047834,GO:0030234,GO:0004357,GO:0035226,GO:0044877,GO:0007568,GO:0008637,GO:0097746,GO:0044344,GO:0071372,GO:0071333,GO:0035729,GO:1990830,GO:0097069,GO:0006534,GO:0006536,GO:0006750,GO:0006749,GO:0035733,GO:2001237,GO:0043524,GO:0035229,GO:0051900,GO:0014823,GO:0042493,GO:0044752,GO:0051409,GO:0007584,GO:0006979	glutamate-cysteine ligase complex|D-threo-aldose 1-dehydrogenase activity|enzyme regulator activity|glutamate-cysteine ligase activity|glutamate-cysteine ligase catalytic subunit binding|protein-containing complex binding|aging|apoptotic mitochondrial changes|blood vessel diameter maintenance|cellular response to fibroblast growth factor stimulus|cellular response to follicle-stimulating hormone …	mmu00270,mmu00480,mmu04216	Cysteine and methionine metabolism|Glutathione metabolism|Ferroptosis	KOG3023	[E]	Glutamate-cysteine ligase regulatory subunit	Amino acid transport and metabolism	KOG3023	S	glutamate-cysteine ligase catalytic subunit binding	Function unknown	PF00248	Aldo_ket_red	Aldo/keto reductase family
O35074	Ptgis	19223	Prostacyclin synthase	GO:0005901,GO:0005737,GO:0005783,GO:0005789,GO:0005615,GO:0016021,GO:0005634,GO:0020037,GO:0106256,GO:0005506,GO:0004497,GO:0016705,GO:0008116,GO:0097190,GO:0071456,GO:0071347,GO:0071354,GO:0046697,GO:0007566,GO:0006690,GO:0050728,GO:0032088,GO:0045019,GO:0045766,GO:1900119,GO:0035360,GO:0001516,GO:0001666	caveola|cytoplasm|endoplasmic reticulum|endoplasmic reticulum membrane|extracellular space|integral component of membrane|nucleus|heme binding|hydroperoxy icosatetraenoate dehydratase activity|iron ion binding|monooxygenase activity|oxidoreductase activity, acting on paired donors, with incorporation or reduction of molecular oxygen|prostaglandin-I synthase activity|apoptotic signaling pathway|ce…	mmu00590	Arachidonic acid metabolism	KOG0684	[Q]	Cytochrome P450	Secondary metabolites biosynthesis, transport and catabolism	KOG0684	C	sterol 14-demethylase activity	Energy production and conversion	PF00067	p450	Cytochrome P450
O35114	Scarb2	12492	Lysosome membrane protein 2	GO:0005737,GO:0030666,GO:0016021,GO:0043202,GO:0005765,GO:0005886,GO:0038024,GO:0051087,GO:0015485,GO:0019899,GO:0031210,GO:0001786,GO:0042803,GO:0005044,GO:0015917,GO:0010467,GO:0010976,GO:0006622,GO:0006898,GO:0043471,GO:1905123,GO:0007605	cytoplasm|endocytic vesicle membrane|integral component of membrane|lysosomal lumen|lysosomal membrane|plasma membrane|cargo receptor activity|chaperone binding|cholesterol binding|enzyme binding|phosphatidylcholine binding|phosphatidylserine binding|protein homodimerization activity|scavenger receptor activity|aminophospholipid transport|gene expression|positive regulation of neuron projection d…	mmu04142	Lysosome	KOG3776	[T]	Plasma membrane glycoprotein CD36 and related membrane receptors	Signal transduction mechanisms	KOG3776	T	system process	Signal transduction mechanisms	PF01130	CD36	CD36 family
O35127	Grcc10	14790	Protein C10	GO:0005737,GO:0016607,GO:0048593,GO:0050890,GO:0021540,GO:0009791,GO:0036343,GO:0014819,GO:0021678	cytoplasm|nuclear speck|camera-type eye morphogenesis|cognition|corpus callosum morphogenesis|post-embryonic development|psychomotor behavior|regulation of skeletal muscle contraction|third ventricle development							ENOG502S2W0	S	third ventricle development	Function unknown	PF14974	P_C10	Protein C10
O35129	Phb2	12034	Prohibitin-2	GO:0030424,GO:0071944,GO:0009986,GO:0005737,GO:0098982,GO:0098978,GO:0098800,GO:0005743,GO:0005741,GO:0035632,GO:0005739,GO:0016363,GO:0005634,GO:0005886,GO:0014069,GO:0048786,GO:0032991,GO:0033218,GO:0042802,GO:0008022,GO:0046982,GO:0042803,GO:0047485,GO:0046625,GO:0007202,GO:1990051,GO:0140374,GO:0042113,GO:0023035,GO:0016477,GO:0071456,GO:0071300,GO:0039520,GO:0060749,GO:0060744,GO:0007005,GO:…	axon|cell periphery|cell surface|cytoplasm|GABA-ergic synapse|glutamatergic synapse|inner mitochondrial membrane protein complex|mitochondrial inner membrane|mitochondrial outer membrane|mitochondrial prohibitin complex|mitochondrion|nuclear matrix|nucleus|plasma membrane|postsynaptic density|presynaptic active zone|protein-containing complex|amide binding|identical protein binding|protein C-term…			KOG3090	[O]	Prohibitin-like protein	Posttranslational modification, protein turnover, chaperones	KOG3090	O	thelarche	Posttranslational modification, protein turnover, chaperones	PF01145	Band_7	SPFH domain / Band 7 family
O35143	Atp5if1	11983	ATPase inhibitor, mitochondrial	GO:0009986,GO:0005739,GO:0032991,GO:0043532,GO:0051117,GO:0042030,GO:0005516,GO:0019899,GO:0042802,GO:0140260,GO:0030218,GO:0006783,GO:0051882,GO:0032780,GO:0001937,GO:0051346,GO:1904925,GO:1901030,GO:1903052,GO:0072593,GO:1903578,GO:1903214	cell surface|mitochondrion|protein-containing complex|angiostatin binding|ATPase binding|ATPase inhibitor activity|calmodulin binding|enzyme binding|identical protein binding|mitochondrial proton-transporting ATP synthase complex binding|erythrocyte differentiation|heme biosynthetic process|mitochondrial depolarization|negative regulation of ATPase activity|negative regulation of endothelial cell…							ENOG502S4JP	S	angiostatin binding	Function unknown	PF04568	IATP	Mitochondrial ATPase inhibitor, IATP
O35166	Gosr2	56494	Golgi SNAP receptor complex member 2	GO:0005829,GO:0005789,GO:0012507,GO:0005794,GO:0000139,GO:0016021,GO:0031902,GO:0031201,GO:0005484,GO:0000149,GO:0006888,GO:0006896,GO:0006891,GO:0006623,GO:0042147,GO:0048280,GO:0016192	cytosol|endoplasmic reticulum membrane|ER to Golgi transport vesicle membrane|Golgi apparatus|Golgi membrane|integral component of membrane|late endosome membrane|SNARE complex|SNAP receptor activity|SNARE binding|endoplasmic reticulum to Golgi vesicle-mediated transport|Golgi to vacuole transport|intra-Golgi vesicle-mediated transport|protein targeting to vacuole|retrograde transport, endosome t…	mmu04130	SNARE interactions in vesicular transport	KOG3251	[U]	Golgi SNAP receptor complex member	Intracellular trafficking, secretion, and vesicular transport	KOG3251	U	vesicle fusion with Golgi apparatus	Intracellular trafficking, secretion, and vesicular transport	PF12352	V-SNARE_C	Snare region anchored in the vesicle membrane C-terminus
O35215	Ddt	13202	D-dopachrome decarboxylase	GO:0005737,GO:0005615,GO:0005126,GO:0033981,GO:0050178,GO:0002020,GO:0042438,GO:0010760,GO:0070374,GO:0050729,GO:0032760	cytoplasm|extracellular space|cytokine receptor binding|D-dopachrome decarboxylase activity|phenylpyruvate tautomerase activity|protease binding|melanin biosynthetic process|negative regulation of macrophage chemotaxis|positive regulation of ERK1 and ERK2 cascade|positive regulation of inflammatory response|positive regulation of tumor necrosis factor production			KOG1759	[V]	Macrophage migration inhibitory factor	Defense mechanisms	KOG1759	O	phenylpyruvate tautomerase activity	Posttranslational modification, protein turnover, chaperones	PF01187	MIF	Macrophage migration inhibitory factor (MIF)
O35226	Psmd4	19185	26S proteasome non-ATPase regulatory subunit 4	GO:0005737,GO:0005829,GO:0005654,GO:0005634,GO:0022624,GO:0000502,GO:0008540,GO:0042802,GO:0031593,GO:0043248,GO:0043161	cytoplasm|cytosol|nucleoplasm|nucleus|proteasome accessory complex|proteasome complex|proteasome regulatory particle, base subcomplex|identical protein binding|polyubiquitin modification-dependent protein binding|proteasome assembly|proteasome-mediated ubiquitin-dependent protein catabolic process	mmu03050,mmu05169,mmu05010,mmu05012,mmu05014,mmu05016,mmu05017,mmu05020,mmu05022	Proteasome|Epstein-Barr virus infection|Alzheimer disease|Parkinson disease|Amyotrophic lateral sclerosis|Huntington disease|Spinocerebellar ataxia|Prion disease|Pathways of neurodegeneration - multiple diseases	KOG2884	[O]	26S proteasome regulatory complex, subunit RPN10/PSMD4	Posttranslational modification, protein turnover, chaperones	KOG2884	O	proteasome assembly	Posttranslational modification, protein turnover, chaperones	PF02809	UIM	Ubiquitin interaction motif
O35286	Dhx15	13204	Pre-mRNA-splicing factor ATP-dependent RNA helicase DHX15	GO:0016607,GO:0005730,GO:0005681,GO:0005689,GO:0071008,GO:0005524,GO:0140603,GO:0003725,GO:0003723,GO:0003724,GO:0006397,GO:0043279,GO:0009636,GO:0008380	nuclear speck|nucleolus|spliceosomal complex|U12-type spliceosomal complex|U2-type post-mRNA release spliceosomal complex|ATP binding|ATP hydrolysis activity|double-stranded RNA binding|RNA binding|RNA helicase activity|mRNA processing|response to alkaloid|response to toxic substance|RNA splicing	mmu03040	Spliceosome	KOG0925	[A]	mRNA splicing factor ATP-dependent RNA helicase	RNA processing and modification	KOG0925	L	helicase activity	Replication, recombination and repair	PF00270	DEAD	DEAD/DEAH box helicase
O35295	Purb	19291	Transcriptional activator protein Pur-beta	GO:0005654,GO:0005634,GO:0003700,GO:0000981,GO:0140297,GO:0001227,GO:0003690,GO:0003691,GO:0003729,GO:0032422,GO:0003723,GO:0000977,GO:0003697,GO:0046332,GO:0000900,GO:0030154,GO:0008283,GO:0006268,GO:0000122,GO:0045892,GO:0006357	nucleoplasm|nucleus|DNA-binding transcription factor activity|DNA-binding transcription factor activity, RNA polymerase II-specific|DNA-binding transcription factor binding|DNA-binding transcription repressor activity, RNA polymerase II-specific|double-stranded DNA binding|double-stranded telomeric DNA binding|mRNA binding|purine-rich negative regulatory element binding|RNA binding|RNA polymerase…			KOG3074	[K]	Transcriptional regulator of the PUR family, single-stranded-DNA-binding	Transcription	KOG3074	S	purine-rich negative regulatory element binding	Function unknown	PF04845	PurA	PurA ssDNA and RNA-binding protein
O35326	Srsf5	20384	Serine/arginine-rich splicing factor 5	GO:0016607,GO:0005634,GO:0003729,GO:0043422,GO:0003723,GO:0050733,GO:0000398,GO:0033120,GO:0032868,GO:0009611	nuclear speck|nucleus|mRNA binding|protein kinase B binding|RNA binding|RS domain binding|mRNA splicing, via spliceosome|positive regulation of RNA splicing|response to insulin|response to wounding	mmu03040,mmu05168	Spliceosome|Herpes simplex virus 1 infection	KOG0106	[A]	Alternative splicing factor SRp55/B52/SRp75 (RRM superfamily)	RNA processing and modification	KOG0106	J	RNA splicing	Translation, ribosomal structure and biogenesis	PF00076	RRM_1	RNA recognition motif. (a.k.a. RRM, RBD, or RNP domain)
O35343	Kpna4	16649	Importin subunit alpha-3	GO:0005737,GO:0031965,GO:0005654,GO:0005634,GO:0061608,GO:0008139,GO:0006607,GO:0006606,GO:0042542	cytoplasm|nuclear membrane|nucleoplasm|nucleus|nuclear import signal receptor activity|nuclear localization sequence binding|NLS-bearing protein import into nucleus|protein import into nucleus|response to hydrogen peroxide	mmu03013,mmu05207,mmu05132	Nucleocytoplasmic transport|Chemical carcinogenesis - receptor activation|Salmonella infection	KOG0166	[U]	Karyopherin (importin) alpha	Intracellular trafficking, secretion, and vesicular transport	KOG0166	U	nuclear import signal receptor activity	Intracellular trafficking, secretion, and vesicular transport	PF00514	Arm	Armadillo/beta-catenin-like repeat
O35344	Kpna3	16648	Importin subunit alpha-4	GO:0005737,GO:0005654,GO:0005634,GO:0061608,GO:0008139,GO:0008022,GO:0006607	cytoplasm|nucleoplasm|nucleus|nuclear import signal receptor activity|nuclear localization sequence binding|protein C-terminus binding|NLS-bearing protein import into nucleus	mmu03013,mmu05207,mmu05132	Nucleocytoplasmic transport|Chemical carcinogenesis - receptor activation|Salmonella infection	KOG0166	[U]	Karyopherin (importin) alpha	Intracellular trafficking, secretion, and vesicular transport	KOG0166	U	nuclear import signal receptor activity	Intracellular trafficking, secretion, and vesicular transport	PF00514	Arm	Armadillo/beta-catenin-like repeat
O35350	Capn1	12333	Calpain-1 catalytic subunit	GO:0005737,GO:0005829,GO:0005764,GO:0016020,GO:0005739,GO:0005886,GO:0005509,GO:0004198,GO:0008092,GO:0019899,GO:0008233,GO:0070301,GO:0060056,GO:0030837,GO:1901223,GO:0010666,GO:1903238,GO:0043117,GO:0016540,GO:0006508,GO:0032801,GO:0050790,GO:1990776,GO:0097264	cytoplasm|cytosol|lysosome|membrane|mitochondrion|plasma membrane|calcium ion binding|calcium-dependent cysteine-type endopeptidase activity|cytoskeletal protein binding|enzyme binding|peptidase activity|cellular response to hydrogen peroxide|mammary gland involution|negative regulation of actin filament polymerization|negative regulation of NIK/NF-kappaB signaling|positive regulation of cardiac …	mmu04141,mmu04210,mmu04217,mmu04218,mmu05010,mmu05022	Protein processing in endoplasmic reticulum|Apoptosis|Necroptosis|Cellular senescence|Alzheimer disease|Pathways of neurodegeneration - multiple diseases	KOG0045	[OT]	Cytosolic Ca2+-dependent cysteine protease (calpain), large subunit (EF-Hand protein superfamily)	Posttranslational modification, protein turnover, chaperones |Signal transduction mechanisms	KOG0045	O	calcium-dependent cysteine-type endopeptidase activity	Posttranslational modification, protein turnover, chaperones	PF00648	Peptidase_C2	Calpain family cysteine protease
O35381	Anp32a	11737	Acidic leucine-rich nuclear phosphoprotein 32 family member A	GO:0005737,GO:0005783,GO:0016363,GO:0005634,GO:0048471,GO:0042393,GO:0006913,GO:0042981	cytoplasm|endoplasmic reticulum|nuclear matrix|nucleus|perinuclear region of cytoplasm|histone binding|nucleocytoplasmic transport|regulation of apoptotic process			KOG2739	[DR]	Leucine-rich acidic nuclear protein	Cell cycle control, cell division, chromosome partitioning |General function prediction only	KOG2739	B	histone binding	Chromatin structure and dynamics	PF12799	LRR_4	Leucine Rich repeats (2 copies)
O35382	Exoc4	20336	Exocyst complex component 4	GO:0031252,GO:0005737,GO:0043198,GO:0000145,GO:0090543,GO:0030426,GO:0032584,GO:0005902,GO:0043209,GO:0035748,GO:0043005,GO:0043025,GO:0005886,GO:0014069,GO:0032991,GO:0045202,GO:0008021,GO:0030165,GO:0047485,GO:0044877,GO:0031267,GO:0007268,GO:0030010,GO:0006887,GO:0006893,GO:0055108,GO:0044091,GO:0048709,GO:0048341,GO:0050850,GO:0006612,GO:0051223,GO:0006904,GO:0090522	cell leading edge|cytoplasm|dendritic shaft|exocyst|Flemming body|growth cone|growth cone membrane|microvillus|myelin sheath|myelin sheath abaxonal region|neuron projection|neuronal cell body|plasma membrane|postsynaptic density|protein-containing complex|synapse|synaptic vesicle|PDZ domain binding|protein N-terminus binding|protein-containing complex binding|small GTPase binding|chemical synapti…	mmu05132	Salmonella infection	KOG3691	[U]	Exocyst complex subunit Sec8	Intracellular trafficking, secretion, and vesicular transport	KOG3691	E	vesicle docking involved in exocytosis	Amino acid transport and metabolism	PF04048	Sec8_exocyst	Sec8 exocyst complex component specific domain
O35459	Ech1	51798	Delta(3,5)-Delta(2,4)-dienoyl-CoA isomerase, mitochondrial	GO:0005739,GO:0005777,GO:0051750,GO:0006635	mitochondrion|peroxisome|delta3,5-delta2,4-dienoyl-CoA isomerase activity|fatty acid beta-oxidation	mmu04146	Peroxisome	KOG1681	[I]	Enoyl-CoA isomerase	Lipid transport and metabolism	KOG1681	S	delta3,5-delta2,4-dienoyl-CoA isomerase activity	Function unknown	PF00378	ECH_1	Enoyl-CoA hydratase/isomerase
O35474	Edil3	13612	EGF-like repeat and discoidin I-like domain-containing protein 3	GO:0005576,GO:0005509,GO:0007155,GO:0010811	extracellular region|calcium ion binding|cell adhesion|positive regulation of cell-substrate adhesion							ENOG502QU9M	S	integrin binding	Function unknown	PF00008	EGF	EGF-like domain
O35593	Psmd14	59029	26S proteasome non-ATPase regulatory subunit 14	GO:0031597,GO:0022624,GO:0000502,GO:0008541,GO:0061133,GO:0004175,GO:0070122,GO:0061578,GO:0046872,GO:0008237,GO:0070628,GO:0004843,GO:0000724,GO:0006303,GO:0043161,GO:0016579,GO:0070536,GO:0061136,GO:0045471	cytosolic proteasome complex|proteasome accessory complex|proteasome complex|proteasome regulatory particle, lid subcomplex|endopeptidase activator activity|endopeptidase activity|isopeptidase activity|Lys63-specific deubiquitinase activity|metal ion binding|metallopeptidase activity|proteasome binding|thiol-dependent deubiquitinase|double-strand break repair via homologous recombination|double-s…	mmu03050,mmu05169,mmu05010,mmu05012,mmu05014,mmu05016,mmu05017,mmu05020,mmu05022	Proteasome|Epstein-Barr virus infection|Alzheimer disease|Parkinson disease|Amyotrophic lateral sclerosis|Huntington disease|Spinocerebellar ataxia|Prion disease|Pathways of neurodegeneration - multiple diseases	KOG1555	[O]	26S proteasome regulatory complex, subunit RPN11	Posttranslational modification, protein turnover, chaperones	KOG1555	A	metallopeptidase activity	RNA processing and modification	PF01398	JAB	JAB1/Mov34/MPN/PAD-1 ubiquitin protease
O35609	Scamp3	24045	Secretory carrier-associated membrane protein 3	GO:0000139,GO:0016021,GO:0043231,GO:0055038,GO:0032588,GO:0031625,GO:0006886,GO:0015031,GO:0010033,GO:0032526	Golgi membrane|integral component of membrane|intracellular membrane-bounded organelle|recycling endosome membrane|trans-Golgi network membrane|ubiquitin protein ligase binding|intracellular protein transport|protein transport|response to organic substance|response to retinoic acid			KOG3088	[U]	Secretory carrier membrane protein	Intracellular trafficking, secretion, and vesicular transport	KOG3088	U	protein transport	Intracellular trafficking, secretion, and vesicular transport	PF04144	SCAMP	SCAMP family
O35639	Anxa3	11745	Annexin A3	GO:0030424,GO:0062023,GO:0005737,GO:0030425,GO:0016020,GO:0043025,GO:0030670,GO:0005886,GO:0042581,GO:0005509,GO:0005544,GO:0048306,GO:0019834,GO:0031100,GO:0042742,GO:0021766,GO:0043312,GO:0006909,GO:0045766,GO:0051054,GO:0051091,GO:0010595,GO:0051384,GO:0070848	axon|collagen-containing extracellular matrix|cytoplasm|dendrite|membrane|neuronal cell body|phagocytic vesicle membrane|plasma membrane|specific granule|calcium ion binding|calcium-dependent phospholipid binding|calcium-dependent protein binding|phospholipase A2 inhibitor activity|animal organ regeneration|defense response to bacterium|hippocampus development|neutrophil degranulation|phagocytosi…			KOG0819	[U]	Annexin	Intracellular trafficking, secretion, and vesicular transport	KOG0819	L	calcium-dependent phospholipid binding	Replication, recombination and repair	PF00191	Annexin	Annexin
O35643	Ap1b1	11764	AP-1 complex subunit beta-1	GO:0030131,GO:0030665,GO:0005829,GO:0005794,GO:0043231,GO:0005802,GO:0030276,GO:0019901,GO:0048268,GO:0007368,GO:0007507,GO:0006886,GO:0001822,GO:0016192	clathrin adaptor complex|clathrin-coated vesicle membrane|cytosol|Golgi apparatus|intracellular membrane-bounded organelle|trans-Golgi network|clathrin binding|protein kinase binding|clathrin coat assembly|determination of left/right symmetry|heart development|intracellular protein transport|kidney development|vesicle-mediated transport	mmu04142,mmu05170	Lysosome|Human immunodeficiency virus 1 infection	KOG1061	[U]	Vesicle coat complex AP-1/AP-2/AP-4, beta subunit	Intracellular trafficking, secretion, and vesicular transport	KOG1061	U	clathrin binding	Intracellular trafficking, secretion, and vesicular transport	PF01602	Adaptin_N	Adaptin N terminal region
O35658	C1qbp	12261	Complement component 1 Q subcomponent-binding protein, mitochondrial	GO:0009986,GO:0005737,GO:0005829,GO:0005615,GO:0098982,GO:0098978,GO:0016020,GO:0005759,GO:0005739,GO:0005730,GO:0005634,GO:0005886,GO:0098793,GO:0048786,GO:0031690,GO:0001849,GO:0005540,GO:0030984,GO:0097177,GO:0003729,GO:0005080,GO:0003714,GO:0008494,GO:0006915,GO:0006958,GO:0045087,GO:0042256,GO:0006397,GO:0050687,GO:0032689,GO:0032695,GO:0039534,GO:0048025,GO:0039536,GO:0000122,GO:0014065,GO:…	cell surface|cytoplasm|cytosol|extracellular space|GABA-ergic synapse|glutamatergic synapse|membrane|mitochondrial matrix|mitochondrion|nucleolus|nucleus|plasma membrane|presynapse|presynaptic active zone|adrenergic receptor binding|complement component C1q complex binding|hyaluronic acid binding|kininogen binding|mitochondrial ribosome binding|mRNA binding|protein kinase C binding|transcription …			KOG4024	[V]	Complement component 1, Q subcomponent binding protein/mRNA splicing factor SF2, subunit P32	Defense mechanisms	KOG4024	S	mitochondrial ribosome binding	Function unknown	PF02330	MAM33	Mitochondrial glycoprotein
O35682	Myadm	50918	Myeloid-associated differentiation marker	GO:0005911,GO:0030864,GO:0016021,GO:0045121,GO:0005886,GO:0001726,GO:0061028,GO:0031579,GO:0030837,GO:0010629,GO:0034115,GO:0090038,GO:0001933,GO:0030335,GO:1900026,GO:0072659	cell-cell junction|cortical actin cytoskeleton|integral component of membrane|membrane raft|plasma membrane|ruffle|establishment of endothelial barrier|membrane raft organization|negative regulation of actin filament polymerization|negative regulation of gene expression|negative regulation of heterotypic cell-cell adhesion|negative regulation of protein kinase C signaling|negative regulation of p…			KOG4788	[V]	Members of chemokine-like factor super family and related proteins	Defense mechanisms	KOG4788	S	membrane raft polarization	Function unknown	PF01284	MARVEL	Membrane-associating domain
O35685	Nudc	18221	Nuclear migration protein nudC	GO:0005737,GO:0005829,GO:0005794,GO:0005874,GO:0030496,GO:0072686,GO:0005634,GO:0051082,GO:0051301,GO:0007080,GO:0007052,GO:0007097,GO:0006457	cytoplasm|cytosol|Golgi apparatus|microtubule|midbody|mitotic spindle|nucleus|unfolded protein binding|cell division|mitotic metaphase plate congression|mitotic spindle organization|nuclear migration|protein folding			KOG2265	[T]	Nuclear distribution protein NUDC	Signal transduction mechanisms	KOG2265	T	unfolded protein binding	Signal transduction mechanisms	PF04969	CS	CS domain
O35737	Hnrnph1	59013	Heterogeneous nuclear ribonucleoprotein H	GO:0071013,GO:0005829,GO:0005654,GO:0005634,GO:1990904,GO:0042802,GO:0003723,GO:0098761,GO:0006397,GO:0043484,GO:0008380	catalytic step 2 spliceosome|cytosol|nucleoplasm|nucleus|ribonucleoprotein complex|identical protein binding|RNA binding|cellular response to interleukin-7|mRNA processing|regulation of RNA splicing|RNA splicing			KOG4211	[A]	Splicing factor hnRNP-F and related RNA-binding proteins	RNA processing and modification	KOG4211	S	regulation of RNA splicing	Function unknown	PF00076	RRM_1	RNA recognition motif. (a.k.a. RRM, RBD, or RNP domain)
O35841	Api5	11800	Apoptosis inhibitor 5	GO:0005737,GO:0016607,GO:0005634,GO:0005681,GO:0017134,GO:0003723,GO:0006915,GO:0043066,GO:2000270	cytoplasm|nuclear speck|nucleus|spliceosomal complex|fibroblast growth factor binding|RNA binding|apoptotic process|negative regulation of apoptotic process|negative regulation of fibroblast apoptotic process			KOG2213	[T]	Apoptosis inhibitor 5/fibroblast growth factor 2-interacting factor 2, and related proteins	Signal transduction mechanisms	KOG2213	S	negative regulation of fibroblast apoptotic process	Function unknown	PF05918	API5	Apoptosis inhibitory protein 5 (API5)
O35855	Bcat2	12036	Branched-chain-amino-acid aminotransferase, mitochondrial	GO:0005737,GO:0005739,GO:0005634,GO:0004084,GO:0052656,GO:0052654,GO:0050048,GO:0052655,GO:0009082,GO:0009083,GO:0009081,GO:1990830,GO:0006550,GO:0006549,GO:0009098,GO:0006551,GO:0010817,GO:0009099,GO:0006573	cytoplasm|mitochondrion|nucleus|branched-chain-amino-acid transaminase activity|L-isoleucine transaminase activity|L-leucine transaminase activity|L-leucine:2-oxoglutarate aminotransferase activity|L-valine transaminase activity|branched-chain amino acid biosynthetic process|branched-chain amino acid catabolic process|branched-chain amino acid metabolic process|cellular response to leukemia inhib…	mmu00270,mmu00280,mmu00290,mmu00770	Cysteine and methionine metabolism|Valine, leucine and isoleucine degradation|Valine, leucine and isoleucine biosynthesis|Pantothenate and CoA biosynthesis	KOG0975	[E]	Branched chain aminotransferase BCAT1, pyridoxal phosphate enzymes type IV superfamily	Amino acid transport and metabolism	KOG0975	E	branched-chain-amino-acid transaminase activity	Amino acid transport and metabolism	PF01063	Aminotran_4	Amino-transferase class IV
O35857	Timm44	21856	Mitochondrial import inner membrane translocase subunit TIM44	GO:0001650,GO:0005743,GO:0005759,GO:0005739,GO:0005524,GO:0051087,GO:0019899,GO:0006886,GO:0030150	fibrillar center|mitochondrial inner membrane|mitochondrial matrix|mitochondrion|ATP binding|chaperone binding|enzyme binding|intracellular protein transport|protein import into mitochondrial matrix			KOG2580	[U]	Mitochondrial import inner membrane translocase, subunit TIM44	Intracellular trafficking, secretion, and vesicular transport	KOG2580	U	protein import into mitochondrial matrix	Intracellular trafficking, secretion, and vesicular transport	PF04280	Tim44	Tim44-like domain
O35864	Cops5	26754	COP9 signalosome complex subunit 5	GO:0000785,GO:0008180,GO:0005737,GO:0005829,GO:0005654,GO:0005634,GO:0048471,GO:0008021,GO:0005667,GO:0019899,GO:0070122,GO:0035718,GO:0046872,GO:0004222,GO:0008237,GO:0019784,GO:0004843,GO:0003713,GO:1990182,GO:0043066,GO:0051091,GO:0045944,GO:0000338,GO:0016579,GO:0051726,GO:1903894,GO:0046328,GO:0006355	chromatin|COP9 signalosome|cytoplasm|cytosol|nucleoplasm|nucleus|perinuclear region of cytoplasm|synaptic vesicle|transcription regulator complex|enzyme binding|isopeptidase activity|macrophage migration inhibitory factor binding|metal ion binding|metalloendopeptidase activity|metallopeptidase activity|NEDD8-specific protease activity|thiol-dependent deubiquitinase|transcription coactivator activ…			KOG1554	[OT]	COP9 signalosome, subunit CSN5	Posttranslational modification, protein turnover, chaperones |Signal transduction mechanisms	KOG1554	T	protein deneddylation	Signal transduction mechanisms	PF01398	JAB	JAB1/Mov34/MPN/PAD-1 ubiquitin protease
O35874	Slc1a4	55963	Neutral amino acid transporter A	GO:0005813,GO:0030425,GO:0016021,GO:0005882,GO:0042470,GO:0016020,GO:0043025,GO:0005886,GO:0005254,GO:0015180,GO:0015183,GO:0015184,GO:0034590,GO:0015193,GO:0015194,GO:0015195,GO:0015175,GO:0015293,GO:0050890,GO:0034589,GO:1904273,GO:0015808,GO:0140009,GO:1903812,GO:0015825,GO:0015824,GO:0098718,GO:0015826	centrosome|dendrite|integral component of membrane|intermediate filament|melanosome|membrane|neuronal cell body|plasma membrane|chloride channel activity|L-alanine transmembrane transporter activity|L-aspartate transmembrane transporter activity|L-cystine transmembrane transporter activity|L-hydroxyproline transmembrane transporter activity|L-proline transmembrane transporter activity|L-serine tr…			KOG3787	[E]	Glutamate/aspartate and neutral amino acid transporters	Amino acid transport and metabolism	KOG3787	C	amino acid transporter	Energy production and conversion	PF00375	SDF	Sodium:dicarboxylate symporter family
O35887	Calu	12321	Calumenin	GO:0005783,GO:0005788,GO:0005789,GO:0005576,GO:0005794,GO:0043231,GO:0042470,GO:0033018,GO:0005509,GO:0019899,GO:0004857	endoplasmic reticulum|endoplasmic reticulum lumen|endoplasmic reticulum membrane|extracellular region|Golgi apparatus|intracellular membrane-bounded organelle|melanosome|sarcoplasmic reticulum lumen|calcium ion binding|enzyme binding|enzyme inhibitor activity			KOG4223	[TU]	Reticulocalbin, calumenin, DNA supercoiling factor, and related Ca2+-binding proteins of the CREC family (EF-Hand protein superfamily)	Signal transduction mechanisms |Intracellular trafficking, secretion, and vesicular transport	KOG4223	L	calcium ion binding	Replication, recombination and repair	PF13202	EF-hand_5	EF hand
O35900	Lsm2	27756	U6 snRNA-associated Sm-like protein LSm2	GO:0071013,GO:0005737,GO:1990726,GO:0120115,GO:0005654,GO:0005634,GO:0000932,GO:0071011,GO:0071005,GO:0046540,GO:0005688,GO:0019901,GO:0003723,GO:0031267,GO:0006402,GO:0000398,GO:0000244	catalytic step 2 spliceosome|cytoplasm|Lsm1-7-Pat1 complex|Lsm2-8 complex|nucleoplasm|nucleus|P-body|precatalytic spliceosome|U2-type precatalytic spliceosome|U4/U6 x U5 tri-snRNP complex|U6 snRNP|protein kinase binding|RNA binding|small GTPase binding|mRNA catabolic process|mRNA splicing, via spliceosome|spliceosomal tri-snRNP complex assembly	mmu03040,mmu03018	Spliceosome|RNA degradation	KOG3448	[A]	Predicted snRNP core protein	RNA processing and modification	KOG3448	J	mRNA splicing, via spliceosome	Translation, ribosomal structure and biogenesis	PF01423	LSM	LSM domain
O35945	Aldh1a7	26358	Aldehyde dehydrogenase, cytosolic 1	GO:0005737,GO:0004029,GO:0018479,GO:0043878,GO:0006068	cytoplasm|aldehyde dehydrogenase (NAD+) activity|benzaldehyde dehydrogenase (NAD+) activity|glyceraldehyde-3-phosphate dehydrogenase (NAD+) (non-phosphorylating) activity|ethanol catabolic process	mmu00830	Retinol metabolism	KOG2450	[C]	Aldehyde dehydrogenase	Energy production and conversion	KOG2450	C	aldehyde dehydrogenase (NAD) activity	Energy production and conversion	PF00171	Aldedh	Aldehyde dehydrogenase family
O35969	Gamt	14431	Guanidinoacetate N-methyltransferase	GO:0005737,GO:0005829,GO:0005902,GO:0005634,GO:0030731,GO:0042802,GO:0008757,GO:0009887,GO:0006601,GO:0032259,GO:0040014,GO:0046498,GO:0046500,GO:0007283	cytoplasm|cytosol|microvillus|nucleus|guanidinoacetate N-methyltransferase activity|identical protein binding|S-adenosylmethionine-dependent methyltransferase activity|animal organ morphogenesis|creatine biosynthetic process|methylation|regulation of multicellular organism growth|S-adenosylhomocysteine metabolic process|S-adenosylmethionine metabolic process|spermatogenesis	mmu00260,mmu00330	Glycine, serine and threonine metabolism|Arginine and proline metabolism	KOG1709	[E]	Guanidinoacetate methyltransferase and related proteins	Amino acid transport and metabolism	KOG1709	J	protein-arginine N5-methyltransferase activity	Translation, ribosomal structure and biogenesis
O54692	Zw10	26951	Centromere/kinetochore protein zw10 homolog	GO:0005829,GO:0070939,GO:0005783,GO:0005789,GO:0000776,GO:0005828,GO:0005811,GO:0005634,GO:1990423,GO:0000922,GO:0051301,GO:0006888,GO:0000132,GO:0007030,GO:0007080,GO:0000070,GO:0007094,GO:0034501,GO:0015031,GO:0065003,GO:0007096	cytosol|Dsl1/NZR complex|endoplasmic reticulum|endoplasmic reticulum membrane|kinetochore|kinetochore microtubule|lipid droplet|nucleus|RZZ complex|spindle pole|cell division|endoplasmic reticulum to Golgi vesicle-mediated transport|establishment of mitotic spindle orientation|Golgi organization|mitotic metaphase plate congression|mitotic sister chromatid segregation|mitotic spindle assembly chec…			KOG2163	[D]	Centromere/kinetochore protein zw10 involved in mitotic chromosome segregation	Cell cycle control, cell division, chromosome partitioning	KOG2163	S	spindle assembly checkpoint	Function unknown	PF06248	Zw10	Centromere/kinetochore Zw10
O54724	Cavin1	19285	Caveolae-associated protein 1	GO:0005901,GO:0005737,GO:0005829,GO:0005783,GO:0043231,GO:0045121,GO:0005739,GO:0005634,GO:0005886,GO:0032991,GO:0042802,GO:0042134,GO:2000147,GO:0009306,GO:0009303,GO:0006363,GO:0006361	caveola|cytoplasm|cytosol|endoplasmic reticulum|intracellular membrane-bounded organelle|membrane raft|mitochondrion|nucleus|plasma membrane|protein-containing complex|identical protein binding|rRNA primary transcript binding|positive regulation of cell motility|protein secretion|rRNA transcription|termination of RNA polymerase I transcription|transcription initiation from RNA polymerase I promot…							ENOG502QV3D	S	rRNA primary transcript binding	Function unknown	PF15237	PTRF_SDPR	PTRF/SDPR family
O54734	Ddost	13200	Dolichyl-diphosphooligosaccharide--protein glycosyltransferase 48 kDa subunit	GO:0005783,GO:0016021,GO:0043231,GO:0008250,GO:0008047,GO:0006486,GO:0006487,GO:0018279,GO:0031647,GO:0034097,GO:0042110	endoplasmic reticulum|integral component of membrane|intracellular membrane-bounded organelle|oligosaccharyltransferase complex|enzyme activator activity|protein glycosylation|protein N-linked glycosylation|protein N-linked glycosylation via asparagine|regulation of protein stability|response to cytokine|T cell activation	mmu00510,mmu00513,mmu04141	N-Glycan biosynthesis|Various types of N-glycan biosynthesis|Protein processing in endoplasmic reticulum	KOG2754	[O]	Oligosaccharyltransferase, beta subunit	Posttranslational modification, protein turnover, chaperones	KOG2754	M	protein N-linked glycosylation via asparagine	Cell wall/membrane/envelope biogenesis	PF03345	DDOST_48kD	Oligosaccharyltransferase 48 kDa subunit beta
O54774	Ap3d1	11776	AP-3 complex subunit delta-1	GO:0030123,GO:0030424,GO:1904115,GO:0010008,GO:0098978,GO:0000139,GO:0098794,GO:0098793,GO:0098830,GO:0043195,GO:0005802,GO:0008089,GO:0048490,GO:0019882,GO:0048007,GO:0035646,GO:0006896,GO:0006886,GO:0098943,GO:0051138,GO:0045944,GO:0072657,GO:0033365,GO:0006623,GO:0061088,GO:0016182,GO:0048499,GO:0016192,GO:0099003,GO:0006829	AP-3 adaptor complex|axon|axon cytoplasm|endosome membrane|glutamatergic synapse|Golgi membrane|postsynapse|presynapse|presynaptic endosome|terminal bouton|trans-Golgi network|anterograde axonal transport|anterograde synaptic vesicle transport|antigen processing and presentation|antigen processing and presentation, exogenous lipid antigen via MHC class Ib|endosome to melanosome transport|Golgi to…	mmu04142	Lysosome	KOG1059	[U]	Vesicle coat complex AP-3, delta subunit	Intracellular trafficking, secretion, and vesicular transport	KOG1059	U	intracellular protein transport	Intracellular trafficking, secretion, and vesicular transport	PF01602	Adaptin_N	Adaptin N terminal region
O54781	Srpk2	20817	SRSF protein kinase 2	GO:0000785,GO:0005737,GO:0005829,GO:0016607,GO:0005730,GO:0005654,GO:0005634,GO:0071889,GO:0005524,GO:0000287,GO:0106310,GO:0004674,GO:0106311,GO:0001525,GO:0030154,GO:0035556,GO:0045071,GO:0035063,GO:0018105,GO:0045787,GO:0008284,GO:0010628,GO:0043525,GO:0045070,GO:0006468,GO:0062176,GO:0050684,GO:0008380,GO:0000245	chromatin|cytoplasm|cytosol|nuclear speck|nucleolus|nucleoplasm|nucleus|14-3-3 protein binding|ATP binding|magnesium ion binding|protein serine kinase activity|protein serine/threonine kinase activity|protein threonine kinase activity|angiogenesis|cell differentiation|intracellular signal transduction|negative regulation of viral genome replication|nuclear speck organization|peptidyl-serine phosp…			KOG1290	[T]	Serine/threonine protein kinase	Signal transduction mechanisms	KOG1290	S	spliceosomal complex assembly	Function unknown	PF00069	Pkinase	Protein kinase domain
O54833	Csnk2a2	13000	Casein kinase II subunit alpha'	GO:0001669,GO:0000785,GO:0005737,GO:0005829,GO:0005634,GO:0031519,GO:0005886,GO:0005956,GO:0005524,GO:0004672,GO:0047485,GO:0106310,GO:0004674,GO:0106311,GO:0006915,GO:0007049,GO:0021987,GO:0097421,GO:2000059,GO:0018105,GO:0018107,GO:0006468,GO:0051726,GO:1905818,GO:0007283,GO:0016055	acrosomal vesicle|chromatin|cytoplasm|cytosol|nucleus|PcG protein complex|plasma membrane|protein kinase CK2 complex|ATP binding|protein kinase activity|protein N-terminus binding|protein serine kinase activity|protein serine/threonine kinase activity|protein threonine kinase activity|apoptotic process|cell cycle|cerebral cortex development|liver regeneration|negative regulation of ubiquitin-depe…	mmu03008,mmu04310,mmu04064,mmu04137,mmu04520,mmu05235,mmu05162,mmu05010,mmu05020,mmu05022	Ribosome biogenesis in eukaryotes|Wnt signaling pathway|NF-kappa B signaling pathway|Mitophagy - animal|Adherens junction|PD-L1 expression and PD-1 checkpoint pathway in cancer|Measles|Alzheimer disease|Prion disease|Pathways of neurodegeneration - multiple diseases	KOG0668	[TDK]	Casein kinase II, alpha subunit	Signal transduction mechanisms |Cell cycle control, cell division, chromosome partitioning |Transcription	KOG0668	F	protein serine/threonine kinase activity	Nucleotide transport and metabolism	PF00069	Pkinase	Protein kinase domain
O54916	Reps1	19707	RalBP1-associated Eps domain-containing protein 1	GO:0005905,GO:0005886,GO:0005509,GO:0017124,GO:0006897,GO:0016197,GO:0006898	clathrin-coated pit|plasma membrane|calcium ion binding|SH3 domain binding|endocytosis|endosomal transport|receptor-mediated endocytosis			KOG1955	[U]	Ral-GTPase effector RALBP1	Intracellular trafficking, secretion, and vesicular transport	KOG1955	S	calcium ion binding	Function unknown	PF12763	EF-hand_4	Cytoskeletal-regulatory complex EF hand
O54931	Akap2	677884	A-kinase anchor protein 2									ENOG502QR7I	S	protein kinase A binding	Function unknown	PF15304	AKAP2_C	A-kinase anchor protein 2 C-terminus
O54941	Smarce1	57376	SWI/SNF-related matrix-associated actin-dependent regulator of chromatin subfamily E member 1	GO:0071565,GO:0071564,GO:0005654,GO:0005634,GO:0016514,GO:0003677,GO:0008080,GO:0016922,GO:0047485,GO:0003723,GO:0043044,GO:0006338,GO:0045892,GO:0022008,GO:0006337	nBAF complex|npBAF complex|nucleoplasm|nucleus|SWI/SNF complex|DNA binding|N-acetyltransferase activity|nuclear receptor binding|protein N-terminus binding|RNA binding|ATP-dependent chromatin remodeling|chromatin remodeling|negative regulation of transcription, DNA-templated|neurogenesis|nucleosome disassembly	mmu04714,mmu05225	Thermogenesis|Hepatocellular carcinoma	KOG4715	[B]	SWI/SNF-related matrix-associated actin-dependent regulator of chromatin	Chromatin structure and dynamics	KOG4715	B	chromatin remodeling	Chromatin structure and dynamics	PF00505	HMG_box	HMG (high mobility group) box
O54962	Banf1	23825	Barrier-to-autointegration factor	GO:0000793,GO:0005737,GO:0005829,GO:0005635,GO:0005654,GO:0005634,GO:0003677,GO:0019899,GO:0042802,GO:0097726,GO:0008022,GO:0042803,GO:0047485,GO:0030261,GO:0007059,GO:0015074,GO:0075713,GO:0045071	condensed chromosome|cytoplasm|cytosol|nuclear envelope|nucleoplasm|nucleus|DNA binding|enzyme binding|identical protein binding|LEM domain binding|protein C-terminus binding|protein homodimerization activity|protein N-terminus binding|chromosome condensation|chromosome segregation|DNA integration|establishment of integrated proviral latency|negative regulation of viral genome replication			KOG4233	[BL]	DNA-bridging protein BAF	Chromatin structure and dynamics |Replication, recombination and repair	KOG4233	S	LEM domain binding	Function unknown	PF02961	BAF	Barrier to autointegration factor
O54984	Get3	56495	ATPase GET3	GO:0043529,GO:0005730,GO:0005654,GO:0005524,GO:0016787,GO:0046872,GO:0006620,GO:0071816	GET complex|nucleolus|nucleoplasm|ATP binding|hydrolase activity|metal ion binding|posttranslational protein targeting to endoplasmic reticulum membrane|tail-anchored membrane protein insertion into ER membrane			KOG2825	[P]	Putative arsenite-translocating ATPase	Inorganic ion transport and metabolism	KOG2825	P	ATPase activity	Inorganic ion transport and metabolism	PF02374	ArsA_ATPase	Anion-transporting ATPase
O54988	Slk	20874	STE20-like serine/threonine-protein kinase	GO:0031252,GO:0005737,GO:0048471,GO:0005524,GO:0042802,GO:0042803,GO:0004672,GO:0106310,GO:0004674,GO:0106311,GO:0006915,GO:0031122,GO:0043065,GO:0033129,GO:0046777,GO:0006468,GO:0042981,GO:0030334,GO:0051893	cell leading edge|cytoplasm|perinuclear region of cytoplasm|ATP binding|identical protein binding|protein homodimerization activity|protein kinase activity|protein serine kinase activity|protein serine/threonine kinase activity|protein threonine kinase activity|apoptotic process|cytoplasmic microtubule organization|positive regulation of apoptotic process|positive regulation of histone phosphoryl…	mmu04114	Oocyte meiosis	KOG0579	[T]	Ste20-like serine/threonine protein kinase	Signal transduction mechanisms	KOG0579	S	stress-activated protein kinase signaling cascade	Function unknown	PF12474	PKK	Polo kinase kinase
O55013	Trappc3	27096	Trafficking protein particle complex subunit 3	GO:0033106,GO:0005829,GO:0005783,GO:0005794,GO:0000139,GO:0030008,GO:0006888,GO:0006891	cis-Golgi network membrane|cytosol|endoplasmic reticulum|Golgi apparatus|Golgi membrane|TRAPP complex|endoplasmic reticulum to Golgi vesicle-mediated transport|intra-Golgi vesicle-mediated transport			KOG3330	[U]	Transport protein particle (TRAPP) complex subunit	Intracellular trafficking, secretion, and vesicular transport	KOG3330	U	Golgi vesicle transport	Intracellular trafficking, secretion, and vesicular transport	PF04051	TRAPP	Transport protein particle (TRAPP) component
O55022	Pgrmc1	53328	Membrane-associated progesterone receptor component 1	GO:0044297,GO:0012505,GO:0005789,GO:0016021,GO:0016020,GO:0005741,GO:0043005,GO:0043025,GO:0045202,GO:0020037,GO:0046872,GO:0042803,GO:0005496,GO:0008306,GO:0006783,GO:0007613,GO:0099563,GO:1905809,GO:1903078	cell body|endomembrane system|endoplasmic reticulum membrane|integral component of membrane|membrane|mitochondrial outer membrane|neuron projection|neuronal cell body|synapse|heme binding|metal ion binding|protein homodimerization activity|steroid binding|associative learning|heme biosynthetic process|memory|modification of synaptic structure|negative regulation of synapse organization|positive r…			KOG1110	[R]	Putative steroid membrane receptor Hpr6.6/25-Dx	General function prediction only	KOG1110	C	steroid binding	Energy production and conversion	PF00173	Cyt-b5	Cytochrome b5-like Heme/Steroid binding domain
O55023	Impa1	55980	Inositol monophosphatase 1	GO:0030424,GO:0005737,GO:0043025,GO:0042802,GO:0008934,GO:0052832,GO:0052833,GO:0052834,GO:0031403,GO:0000287,GO:0030145,GO:0042803,GO:0006021,GO:0006020,GO:0046855,GO:0006796,GO:0006661,GO:0046854,GO:0007165	axon|cytoplasm|neuronal cell body|identical protein binding|inositol monophosphate 1-phosphatase activity|inositol monophosphate 3-phosphatase activity|inositol monophosphate 4-phosphatase activity|inositol monophosphate phosphatase activity|lithium ion binding|magnesium ion binding|manganese ion binding|protein homodimerization activity|inositol biosynthetic process|inositol metabolic process|in…	mmu00562,mmu04070	Inositol phosphate metabolism|Phosphatidylinositol signaling system	KOG2951	[G]	Inositol monophosphatase	Carbohydrate transport and metabolism	KOG2951	G	Inositol-1-monophosphatase	Carbohydrate transport and metabolism	PF00459	Inositol_P	Inositol monophosphatase family
O55029	Copb2	50797	Coatomer subunit beta'	GO:0030126,GO:0005829,GO:0005794,GO:0000139,GO:0005080,GO:0005198,GO:0006888,GO:0006891,GO:0006886,GO:0006890,GO:1901998	COPI vesicle coat|cytosol|Golgi apparatus|Golgi membrane|protein kinase C binding|structural molecule activity|endoplasmic reticulum to Golgi vesicle-mediated transport|intra-Golgi vesicle-mediated transport|intracellular protein transport|retrograde vesicle-mediated transport, Golgi to endoplasmic reticulum|toxin transport			KOG0276	[U]	Vesicle coat complex COPI, beta' subunit	Intracellular trafficking, secretion, and vesicular transport	KOG0276	U	intra-Golgi vesicle-mediated transport	Intracellular trafficking, secretion, and vesicular transport	PF00400	WD40	WD domain, G-beta repeat
O55091	Impact	16210	Protein IMPACT	GO:0005829,GO:0005844,GO:0003779,GO:0043022,GO:0071468,GO:0034198,GO:0072755,GO:0042149,GO:0070301,GO:1990253,GO:0071494,GO:0140469,GO:0060548,GO:0031953,GO:0001933,GO:0031333,GO:0000122,GO:0097201,GO:1990138,GO:0045666,GO:0071264,GO:0006446	cytosol|polysome|actin binding|ribosome binding|cellular response to acidic pH|cellular response to amino acid starvation|cellular response to benomyl|cellular response to glucose starvation|cellular response to hydrogen peroxide|cellular response to leucine starvation|cellular response to UV-C|GCN2-mediated signaling|negative regulation of cell death|negative regulation of protein autophosphoryl…			KOG3299	[S]	Uncharacterized conserved protein	Function unknown	KOG3299	K	response to benomyl	Transcription	PF01205	UPF0029	Uncharacterized protein family UPF0029
O55106	Strn	268980	Striatin	GO:0005923,GO:0005737,GO:0030425,GO:0043197,GO:0090443,GO:0016020,GO:0043025,GO:0014069,GO:0045211,GO:0032991,GO:0070016,GO:0005516,GO:0030331,GO:0019904,GO:0051721,GO:0044877,GO:0016358,GO:0007626,GO:0008285,GO:0016055	bicellular tight junction|cytoplasm|dendrite|dendritic spine|FAR/SIN/STRIPAK complex|membrane|neuronal cell body|postsynaptic density|postsynaptic membrane|protein-containing complex|armadillo repeat domain binding|calmodulin binding|estrogen receptor binding|protein domain specific binding|protein phosphatase 2A binding|protein-containing complex binding|dendrite development|locomotory behavior|…			KOG0642	[D]	Cell-cycle nuclear protein, contains WD-40 repeats	Cell cycle control, cell division, chromosome partitioning	KOG0642	S	armadillo repeat domain binding	Function unknown	PF00400	WD40	WD domain, G-beta repeat
O55131	Septin7	235072	Septin-7	GO:0043679,GO:0005930,GO:0044297,GO:0005938,GO:0032153,GO:0032154,GO:0098978,GO:0000776,GO:0016020,GO:0015630,GO:0030496,GO:0043209,GO:0043005,GO:0097730,GO:0005634,GO:0042734,GO:0032991,GO:0031105,GO:0032156,GO:0032160,GO:0005940,GO:0097227,GO:0005819,GO:0001725,GO:0045202,GO:0005525,GO:0003924,GO:0042802,GO:0060090,GO:0034613,GO:0060271,GO:0048668,GO:0030865,GO:0061640,GO:0060997,GO:0000281,GO:…	axon terminus|axoneme|cell body|cell cortex|cell division site|cleavage furrow|glutamatergic synapse|kinetochore|membrane|microtubule cytoskeleton|midbody|myelin sheath|neuron projection|non-motile cilium|nucleus|presynaptic membrane|protein-containing complex|septin complex|septin cytoskeleton|septin filament array|septin ring|sperm annulus|spindle|stress fiber|synapse|GTP binding|GTPase activit…			KOG2655	[DZU]	Septin family protein (P-loop GTPase)	Cell cycle control, cell division, chromosome partitioning |Cytoskeleton |Intracellular trafficking, secretion, and vesicular transport	KOG2655	D	GTP binding	Cell cycle control, cell division, chromosome partitioning	PF00735	Septin	Septin
O55135	Eif6	16418	Eukaryotic translation initiation factor 6	GO:0005737,GO:0005829,GO:0005882,GO:0005638,GO:0005730,GO:0005654,GO:0005634,GO:0030687,GO:0043023,GO:0043022,GO:0003743,GO:1902626,GO:0035195,GO:0000460,GO:0000470,GO:0042256,GO:0035278,GO:0045727,GO:0042304,GO:0006110,GO:0045652,GO:2000377,GO:0032868,GO:0000054	cytoplasm|cytosol|intermediate filament|lamin filament|nucleolus|nucleoplasm|nucleus|preribosome, large subunit precursor|ribosomal large subunit binding|ribosome binding|translation initiation factor activity|assembly of large subunit precursor of preribosome|gene silencing by miRNA|maturation of 5.8S rRNA|maturation of LSU-rRNA|mature ribosome assembly|miRNA mediated inhibition of translation|p…	mmu03008	Ribosome biogenesis in eukaryotes	KOG3185	[J]	Translation initiation factor 6 (eIF-6)	Translation, ribosomal structure and biogenesis	KOG3185	J	mature ribosome assembly	Translation, ribosomal structure and biogenesis	PF01912	eIF-6	eIF-6 family
O55142	Rpl35a	57808	60S ribosomal protein L35a	GO:0005829,GO:0022625,GO:0022626,GO:0005739,GO:0043021,GO:0003735,GO:0002181,GO:0042273,GO:0006364	cytosol|cytosolic large ribosomal subunit|cytosolic ribosome|mitochondrion|ribonucleoprotein complex binding|structural constituent of ribosome|cytoplasmic translation|ribosomal large subunit biogenesis|rRNA processing	mmu03010,mmu05171	Ribosome|Coronavirus disease - COVID-19	KOG0887	[J]	60S ribosomal protein L35A/L37	Translation, ribosomal structure and biogenesis	KOG0887	J	structural constituent of ribosome	Translation, ribosomal structure and biogenesis	PF01247	Ribosomal_L35Ae	Ribosomal protein L35Ae
O55143	Atp2a2	11938	Sarcoplasmic/endoplasmic reticulum calcium ATPase 2	GO:0061831,GO:0090534,GO:0005783,GO:0005789,GO:0031234,GO:0014801,GO:0016020,GO:0048471,GO:0120025,GO:0032991,GO:0097470,GO:0016529,GO:0033017,GO:0012506,GO:0005524,GO:0005509,GO:0019899,GO:0031775,GO:0005388,GO:0086039,GO:0008553,GO:0008022,GO:0044548,GO:0044325,GO:0000045,GO:0016240,GO:1990036,GO:0070588,GO:0006816,GO:1903515,GO:0014898,GO:0006874,GO:0034605,GO:0034599,GO:0032469,GO:0006984,GO:…	apical ectoplasmic specialization|calcium ion-transporting ATPase complex|endoplasmic reticulum|endoplasmic reticulum membrane|extrinsic component of cytoplasmic side of plasma membrane|longitudinal sarcoplasmic reticulum|membrane|perinuclear region of cytoplasm|plasma membrane bounded cell projection|protein-containing complex|ribbon synapse|sarcoplasmic reticulum|sarcoplasmic reticulum membrane…	mmu04020,mmu04024,mmu04022,mmu04919,mmu04260,mmu04261,mmu04972,mmu05010,mmu05017,mmu05022,mmu05410,mmu05412,mmu05414,mmu05415	Calcium signaling pathway|cAMP signaling pathway|cGMP-PKG signaling pathway|Thyroid hormone signaling pathway|Cardiac muscle contraction|Adrenergic signaling in cardiomyocytes|Pancreatic secretion|Alzheimer disease|Spinocerebellar ataxia|Pathways of neurodegeneration - multiple diseases|Hypertrophic cardiomyopathy|Arrhythmogenic right ventricular cardiomyopathy|Dilated cardiomyopathy|Diabetic car…	KOG0202	[P]	Ca2+ transporting ATPase	Inorganic ion transport and metabolism	KOG0202	P	calcium-transporting ATPase activity	Inorganic ion transport and metabolism	PF00122	E1-E2_ATPase	E1-E2 ATPase
O55201	Supt5h	20924	Transcription elongation factor SPT5	GO:0032044,GO:0005654,GO:0005634,GO:0003682,GO:0019899,GO:0003729,GO:0046982,GO:0032785,GO:1900364,GO:0000122,GO:0032786,GO:0016239,GO:0045944,GO:0006357,GO:0006368	DSIF complex|nucleoplasm|nucleus|chromatin binding|enzyme binding|mRNA binding|protein heterodimerization activity|negative regulation of DNA-templated transcription, elongation|negative regulation of mRNA polyadenylation|negative regulation of transcription by RNA polymerase II|positive regulation of DNA-templated transcription, elongation|positive regulation of macroautophagy|positive regulatio…			KOG1999	[K]	RNA polymerase II transcription elongation factor DSIF/SUPT5H/SPT5	Transcription	KOG1999	K	regulation of DNA-templated transcription, elongation	Transcription	PF00467	KOW	KOW motif
O55222	Ilk	16202	Integrin-linked protein kinase	GO:0030424,GO:0005911,GO:0043034,GO:0005737,GO:0043198,GO:0005925,GO:0030027,GO:0043025,GO:0005654,GO:0005886,GO:0032991,GO:0030017,GO:0001725,GO:0043195,GO:0005524,GO:0005178,GO:0019904,GO:0004672,GO:0019901,GO:0106310,GO:0004674,GO:0106311,GO:0044877,GO:0017124,GO:0001658,GO:0007569,GO:0000902,GO:0030030,GO:0007160,GO:0045197,GO:0010761,GO:0007229,GO:0032288,GO:0022011,GO:0043066,GO:0010667,GO:…	axon|cell-cell junction|costamere|cytoplasm|dendritic shaft|focal adhesion|lamellipodium|neuronal cell body|nucleoplasm|plasma membrane|protein-containing complex|sarcomere|stress fiber|terminal bouton|ATP binding|integrin binding|protein domain specific binding|protein kinase activity|protein kinase binding|protein serine kinase activity|protein serine/threonine kinase activity|protein threonine…	mmu04510,mmu03320,mmu04360,mmu05213,mmu05100	Focal adhesion|PPAR signaling pathway|Axon guidance|Endometrial cancer|Bacterial invasion of epithelial cells	KOG0195	[T]	Integrin-linked kinase	Signal transduction mechanisms	KOG0195	G	integrin-mediated signaling pathway	Carbohydrate transport and metabolism	PF00023	Ank	Ankyrin repeat
O55234	Psmb5	19173	Proteasome subunit beta type-5	GO:0005813,GO:0005737,GO:0005829,GO:0005654,GO:0005634,GO:0000502,GO:0005839,GO:0019774,GO:0004175,GO:0008233,GO:0004298,GO:0010499,GO:0043161,GO:0006508,GO:0006979	centrosome|cytoplasm|cytosol|nucleoplasm|nucleus|proteasome complex|proteasome core complex|proteasome core complex, beta-subunit complex|endopeptidase activity|peptidase activity|threonine-type endopeptidase activity|proteasomal ubiquitin-independent protein catabolic process|proteasome-mediated ubiquitin-dependent protein catabolic process|proteolysis|response to oxidative stress	mmu03050,mmu05010,mmu05012,mmu05014,mmu05016,mmu05017,mmu05020,mmu05022	Proteasome|Alzheimer disease|Parkinson disease|Amyotrophic lateral sclerosis|Huntington disease|Spinocerebellar ataxia|Prion disease|Pathways of neurodegeneration - multiple diseases	KOG0175	[O]	20S proteasome, regulatory subunit beta type PSMB5/PSMB8/PRE2	Posttranslational modification, protein turnover, chaperones	KOG0175	O	threonine-type endopeptidase activity	Posttranslational modification, protein turnover, chaperones	PF00227	Proteasome	Proteasome subunit
O70133	Dhx9	13211	ATP-dependent RNA helicase A	GO:0015629,GO:0005813,GO:0070937,GO:0005737,GO:0036464,GO:0016604,GO:0097165,GO:0005730,GO:0005654,GO:0005634,GO:0005726,GO:0042788,GO:0005844,GO:0032991,GO:1990904,GO:0016442,GO:0070578,GO:0043138,GO:0033679,GO:0034458,GO:0005524,GO:0140603,GO:0031490,GO:0003677,GO:0003678,GO:0003688,GO:0003690,GO:0003725,GO:0061676,GO:0046872,GO:0003729,GO:0017111,GO:0047429,GO:1905538,GO:1990841,GO:0001069,GO:…	actin cytoskeleton|centrosome|CRD-mediated mRNA stability complex|cytoplasm|cytoplasmic ribonucleoprotein granule|nuclear body|nuclear stress granule|nucleolus|nucleoplasm|nucleus|perichromatin fibrils|polysomal ribosome|polysome|protein-containing complex|ribonucleoprotein complex|RISC complex|RISC-loading complex|3'-5' DNA helicase activity|3'-5' DNA/RNA helicase activity|3'-5' RNA helicase act…			KOG0921	[K]	Dosage compensation complex, subunit MLE	Transcription	KOG0921	L	positive regulation of polysome binding	Replication, recombination and repair	PF00035	dsrm	Double-stranded RNA binding motif
O70194	Eif3d	55944	Eukaryotic translation initiation factor 3 subunit D	GO:0016282,GO:0033290,GO:0005852,GO:0071541,GO:0098808,GO:0003723,GO:0003743,GO:0002191,GO:0001732,GO:0075522,GO:1902416,GO:0045727,GO:0006413,GO:0075525	eukaryotic 43S preinitiation complex|eukaryotic 48S preinitiation complex|eukaryotic translation initiation factor 3 complex|eukaryotic translation initiation factor 3 complex, eIF3m|mRNA cap binding|RNA binding|translation initiation factor activity|cap-dependent translational initiation|formation of cytoplasmic translation initiation complex|IRES-dependent viral translational initiation|positiv…			KOG2479	[J]	Translation initiation factor 3, subunit d (eIF-3d)	Translation, ribosomal structure and biogenesis	KOG2479	J	translation initiation factor activity	Translation, ribosomal structure and biogenesis	PF05091	eIF-3_zeta	Eukaryotic translation initiation factor 3 subunit 7 (eIF-3)
O70251	Eef1b	55949	Elongation factor 1-beta	GO:0005737,GO:0005829,GO:0005783,GO:0005853,GO:0005085,GO:0003746,GO:0045471,GO:0006414	cytoplasm|cytosol|endoplasmic reticulum|eukaryotic translation elongation factor 1 complex|guanyl-nucleotide exchange factor activity|translation elongation factor activity|response to ethanol|translational elongation			KOG1668	[K]	Elongation factor 1 beta/delta chain	Transcription	KOG1668	J	translation elongation factor activity	Translation, ribosomal structure and biogenesis	PF00736	EF1_GNE	EF-1 guanine nucleotide exchange domain
O70252	Hmox2	15369	Heme oxygenase 2	GO:0005783,GO:0005886,GO:0020037,GO:0004392,GO:0046872,GO:0042167,GO:0006788,GO:0055072,GO:0001666,GO:0006979	endoplasmic reticulum|plasma membrane|heme binding|heme oxygenase (decyclizing) activity|metal ion binding|heme catabolic process|heme oxidation|iron ion homeostasis|response to hypoxia|response to oxidative stress	mmu00860,mmu04978	Porphyrin metabolism|Mineral absorption	KOG4480	[P]	Heme oxygenase	Inorganic ion transport and metabolism	KOG4480	P	heme oxidation	Inorganic ion transport and metabolism	PF01126	Heme_oxygenase	Heme oxygenase
O70310	Nmt1	18107	Glycylpeptide N-tetradecanoyltransferase 1	GO:0005737,GO:0005829,GO:0019898,GO:0005886,GO:0004379,GO:0019107,GO:0042180,GO:0001701,GO:0018008,GO:0006499	cytoplasm|cytosol|extrinsic component of membrane|plasma membrane|glycylpeptide N-tetradecanoyltransferase activity|myristoyltransferase activity|cellular ketone metabolic process|in utero embryonic development|N-terminal peptidyl-glycine N-myristoylation|N-terminal protein myristoylation			KOG2779	[I]	N-myristoyl transferase	Lipid transport and metabolism	KOG2779	I	Adds a myristoyl group to the N-terminal glycine residue of certain cellular proteins	Lipid transport and metabolism	PF01233	NMT	Myristoyl-CoA:protein N-myristoyltransferase, N-terminal domain
O70311	Nmt2	18108	Glycylpeptide N-tetradecanoyltransferase 2	GO:0005737,GO:0005829,GO:0019898,GO:0005794,GO:0005886,GO:0004379,GO:0018008,GO:0006499	cytoplasm|cytosol|extrinsic component of membrane|Golgi apparatus|plasma membrane|glycylpeptide N-tetradecanoyltransferase activity|N-terminal peptidyl-glycine N-myristoylation|N-terminal protein myristoylation			KOG2779	[I]	N-myristoyl transferase	Lipid transport and metabolism	KOG2779	I	Adds a myristoyl group to the N-terminal glycine residue of certain cellular proteins	Lipid transport and metabolism	PF01233	NMT	Myristoyl-CoA:protein N-myristoyltransferase, N-terminal domain
O70318	Epb41l2	13822	Band 4.1-like protein 2	GO:0015629,GO:0099738,GO:0030054,GO:0008180,GO:0005856,GO:0005654,GO:0005886,GO:0003779,GO:0042731,GO:0030507,GO:0005198,GO:0030036,GO:0031032,GO:0007049,GO:0051301,GO:0030866,GO:1904778,GO:0008360	actin cytoskeleton|cell cortex region|cell junction|COP9 signalosome|cytoskeleton|nucleoplasm|plasma membrane|actin binding|PH domain binding|spectrin binding|structural molecule activity|actin cytoskeleton organization|actomyosin structure organization|cell cycle|cell division|cortical actin cytoskeleton organization|positive regulation of protein localization to cell cortex|regulation of cell s…			KOG3527	[R]	Erythrocyte membrane protein 4.1 and related proteins of the ERM family	General function prediction only	KOG3527	L	positive regulation of protein localization to cell cortex	Replication, recombination and repair	PF00373	FERM_M	FERM central domain
O70325	Gpx4	625249	Phospholipid hydroperoxide glutathione peroxidase	GO:0005829,GO:0005743,GO:0005739,GO:0005635,GO:0005634,GO:0032991,GO:0004602,GO:0042802,GO:0004601,GO:0047066,GO:0008430,GO:0007568,GO:0019369,GO:0006325,GO:0006749,GO:0019372,GO:0110076,GO:0051258,GO:0050727,GO:0032355,GO:0006979,GO:0007283	cytosol|mitochondrial inner membrane|mitochondrion|nuclear envelope|nucleus|protein-containing complex|glutathione peroxidase activity|identical protein binding|peroxidase activity|phospholipid-hydroperoxide glutathione peroxidase activity|selenium binding|aging|arachidonic acid metabolic process|chromatin organization|glutathione metabolic process|lipoxygenase pathway|negative regulation of ferr…	mmu00480,mmu04216	Glutathione metabolism|Ferroptosis	KOG1651	[O]	Glutathione peroxidase	Posttranslational modification, protein turnover, chaperones					PF00255	GSHPx	Glutathione peroxidase
O70378	Emc8	18117	ER membrane protein complex subunit 8	GO:0005737,GO:0005829,GO:0072546,GO:0005739,GO:0032977,GO:0045050,GO:0071816	cytoplasm|cytosol|EMC complex|mitochondrion|membrane insertase activity|protein insertion into ER membrane by stop-transfer membrane-anchor sequence|tail-anchored membrane protein insertion into ER membrane			KOG3289	[R]	Uncharacterized conserved protein encoded by sequence overlapping the COX4 gene	General function prediction only	KOG3289	F	Uncharacterised protein family (UPF0172)	Nucleotide transport and metabolism	PF03665	UPF0172	Uncharacterised protein family (UPF0172)
O70400	Pdlim1	54132	PDZ and LIM domain protein 1	GO:0015629,GO:0005912,GO:0005737,GO:0005856,GO:0031941,GO:0001725,GO:0005667,GO:0030018,GO:0003779,GO:0046872,GO:0051371,GO:0003713,GO:0030036,GO:0030950,GO:0010761,GO:0007507,GO:0030011,GO:0061061,GO:0006357,GO:0001666,GO:0043149	actin cytoskeleton|adherens junction|cytoplasm|cytoskeleton|filamentous actin|stress fiber|transcription regulator complex|Z disc|actin binding|metal ion binding|muscle alpha-actinin binding|transcription coactivator activity|actin cytoskeleton organization|establishment or maintenance of actin cytoskeleton polarity|fibroblast migration|heart development|maintenance of cell polarity|muscle struct…			KOG1703	[TZ]	Adaptor protein Enigma and related PDZ-LIM proteins	Signal transduction mechanisms |Cytoskeleton	KOG1703	O	actinin binding	Posttranslational modification, protein turnover, chaperones	PF00412	LIM	LIM domain
O70404	Vamp8	22320	Vesicle-associated membrane protein 8	GO:0035577,GO:0016323,GO:0009986,GO:0005737,GO:0005829,GO:0005769,GO:0031901,GO:0016021,GO:0031902,GO:0005765,GO:0005764,GO:0016020,GO:0030496,GO:0005739,GO:0098594,GO:0048471,GO:0045335,GO:0005886,GO:0055037,GO:0030141,GO:0030667,GO:0031201,GO:0031982,GO:0042588,GO:0019869,GO:0005484,GO:0019905,GO:0097352,GO:0016240,GO:0071346,GO:0051607,GO:0061025,GO:0070254,GO:1903531,GO:1903595,GO:1902278,GO:…	azurophil granule membrane|basolateral plasma membrane|cell surface|cytoplasm|cytosol|early endosome|early endosome membrane|integral component of membrane|late endosome membrane|lysosomal membrane|lysosome|membrane|midbody|mitochondrion|mucin granule|perinuclear region of cytoplasm|phagocytic vesicle|plasma membrane|recycling endosome|secretory granule|secretory granule membrane|SNARE complex|ve…	mmu04130,mmu04140,mmu04611	SNARE interactions in vesicular transport|Autophagy - animal|Platelet activation	KOG0860	[U]	Synaptobrevin/VAMP-like protein	Intracellular trafficking, secretion, and vesicular transport	KOG0860	U	SNAP receptor activity	Intracellular trafficking, secretion, and vesicular transport	PF00957	Synaptobrevin	Synaptobrevin
O70433	Fhl2	14200	Four and a half LIM domains protein 2	GO:0031430,GO:0005634,GO:0030018,GO:0043425,GO:0042802,GO:0046872,GO:0003712,GO:0003714,GO:0008134,GO:0055014,GO:0060347,GO:0043066,GO:0070885,GO:0000122,GO:0001649,GO:0006357,GO:0009725,GO:0055015	M band|nucleus|Z disc|bHLH transcription factor binding|identical protein binding|metal ion binding|transcription coregulator activity|transcription corepressor activity|transcription factor binding|atrial cardiac muscle cell development|heart trabecula formation|negative regulation of apoptotic process|negative regulation of calcineurin-NFAT signaling cascade|negative regulation of transcription…	mmu04380	Osteoclast differentiation	KOG1704	[TZR]	FOG: LIM domain	Signal transduction mechanisms |Cytoskeleton |General function prediction only	KOG1704	F	zinc ion binding	Nucleotide transport and metabolism	PF00412	LIM	LIM domain
O70435	Psma3	19167	Proteasome subunit alpha type-3	GO:0005737,GO:0005829,GO:0005654,GO:0005634,GO:0000502,GO:0005839,GO:0019773,GO:0045202,GO:0004175,GO:0031625,GO:0010499,GO:0043161,GO:0052548	cytoplasm|cytosol|nucleoplasm|nucleus|proteasome complex|proteasome core complex|proteasome core complex, alpha-subunit complex|synapse|endopeptidase activity|ubiquitin protein ligase binding|proteasomal ubiquitin-independent protein catabolic process|proteasome-mediated ubiquitin-dependent protein catabolic process|regulation of endopeptidase activity	mmu03050,mmu05010,mmu05012,mmu05014,mmu05016,mmu05017,mmu05020,mmu05022	Proteasome|Alzheimer disease|Parkinson disease|Amyotrophic lateral sclerosis|Huntington disease|Spinocerebellar ataxia|Prion disease|Pathways of neurodegeneration - multiple diseases	KOG0184	[O]	20S proteasome, regulatory subunit alpha type PSMA3/PRE10	Posttranslational modification, protein turnover, chaperones	KOG0184	O	The proteasome is a multicatalytic proteinase complex which is characterized by its ability to cleave peptides with Arg, Phe, Tyr, Leu, and Glu adjacent to the leaving group at neutral or slightly basic pH	Posttranslational modification, protein turnover, chaperones	PF00227	Proteasome	Proteasome subunit
O70456	Sfn	55948	14-3-3 protein sigma	GO:0005737,GO:0005829,GO:0005576,GO:0005634,GO:0042802,GO:0051219,GO:0019901,GO:0061436,GO:0008630,GO:0031424,GO:0003334,GO:0030216,GO:0043154,GO:0010839,GO:0030307,GO:0045606,GO:0046827,GO:0051726,GO:0000079,GO:0010482,GO:0001836,GO:0043588	cytoplasm|cytosol|extracellular region|nucleus|identical protein binding|phosphoprotein binding|protein kinase binding|establishment of skin barrier|intrinsic apoptotic signaling pathway in response to DNA damage|keratinization|keratinocyte development|keratinocyte differentiation|negative regulation of cysteine-type endopeptidase activity involved in apoptotic process|negative regulation of kera…	mmu04110,mmu04115,mmu04960	Cell cycle|p53 signaling pathway|Aldosterone-regulated sodium reabsorption	KOG0841	[O]	Multifunctional chaperone (14-3-3 family)	Posttranslational modification, protein turnover, chaperones	KOG0841	T	protein domain specific binding	Signal transduction mechanisms	PF00244	14-3-3	14-3-3 protein
O70475	Ugdh	22235	UDP-glucose 6-dehydrogenase	GO:0005829,GO:0005654,GO:0005634,GO:0042802,GO:0051287,GO:0003979,GO:0005975,GO:0030206,GO:0001702,GO:0006024,GO:0015012,GO:0048666,GO:0034214,GO:0006065	cytosol|nucleoplasm|nucleus|identical protein binding|NAD binding|UDP-glucose 6-dehydrogenase activity|carbohydrate metabolic process|chondroitin sulfate biosynthetic process|gastrulation with mouth forming second|glycosaminoglycan biosynthetic process|heparan sulfate proteoglycan biosynthetic process|neuron development|protein hexamerization|UDP-glucuronate biosynthetic process	mmu00040,mmu00053,mmu00520	Pentose and glucuronate interconversions|Ascorbate and aldarate metabolism|Amino sugar and nucleotide sugar metabolism	KOG2666	[GT]	UDP-glucose/GDP-mannose dehydrogenase	Carbohydrate transport and metabolism |Signal transduction mechanisms	KOG2666	M	UDP-glucose 6-dehydrogenase activity	Cell wall/membrane/envelope biogenesis	PF00984	UDPG_MGDP_dh	UDP-glucose/GDP-mannose dehydrogenase family, central domain
O70492	Snx3	54198	Sorting nexin-3	GO:0030136,GO:0005737,GO:0005829,GO:0005769,GO:0031901,GO:0032009,GO:0010008,GO:0030904,GO:0080025,GO:0032266,GO:0070273,GO:0010314,GO:0019903,GO:1905394,GO:0032456,GO:0006783,GO:0042541,GO:0070676,GO:0034499,GO:0010324,GO:2000642,GO:0050765,GO:0042177,GO:0051224,GO:0046597,GO:0010976,GO:0022615,GO:0032268,GO:0033157,GO:0030111,GO:0009617,GO:0033572	clathrin-coated vesicle|cytoplasm|cytosol|early endosome|early endosome membrane|early phagosome|endosome membrane|retromer complex|phosphatidylinositol-3,5-bisphosphate binding|phosphatidylinositol-3-phosphate binding|phosphatidylinositol-4-phosphate binding|phosphatidylinositol-5-phosphate binding|protein phosphatase binding|retromer complex binding|endocytic recycling|heme biosynthetic process…	mmu04144	Endocytosis	KOG2527	[U]	Sorting nexin SNX11	Intracellular trafficking, secretion, and vesicular transport	KOG2527	U	phosphatidylinositol binding	Intracellular trafficking, secretion, and vesicular transport	PF00787	PX	PX domain
O70503	Hsd17b12	56348	Very-long-chain 3-oxoacyl-CoA reductase	GO:0031012,GO:0009923,GO:0016021,GO:0044594,GO:0072582,GO:0102339,GO:0102340,GO:0102342,GO:0102341,GO:0005518,GO:0001968,GO:0008201,GO:0050062,GO:0006703,GO:0030198,GO:0006633,GO:0010811	extracellular matrix|fatty acid elongase complex|integral component of membrane|17-beta-hydroxysteroid dehydrogenase (NAD+) activity|17-beta-hydroxysteroid dehydrogenase (NADP+) activity|3-oxo-arachidoyl-CoA reductase activity|3-oxo-behenoyl-CoA reductase activity|3-oxo-cerotoyl-CoA reductase activity|3-oxo-lignoceroyl-CoA reductase activity|collagen binding|fibronectin binding|heparin binding|lo…	mmu00062,mmu00140,mmu01040	Fatty acid elongation|Steroid hormone biosynthesis|Biosynthesis of unsaturated fatty acids	KOG1014	[I]	17 beta-hydroxysteroid dehydrogenase type 3, HSD17B3	Lipid transport and metabolism	KOG1014	G	3-oxo-behenoyl-CoA reductase activity	Carbohydrate transport and metabolism	PF00106	adh_short	short chain dehydrogenase
O70554	Sprr2b	621968	Small proline-rich protein 2B	GO:0001533,GO:0005737,GO:0008544,GO:0031424,GO:0030216,GO:0032355	cornified envelope|cytoplasm|epidermis development|keratinization|keratinocyte differentiation|response to estradiol											PF14820	SPRR2	Small proline-rich 2
O70579	Slc25a17	20524	Peroxisomal membrane protein PMP34	GO:0005779,GO:0005739,GO:0005778,GO:0005777,GO:0015217,GO:0080122,GO:0005347,GO:0051087,GO:0015228,GO:0015230,GO:0044610,GO:0051724,GO:0015866,GO:0080121,GO:0015867,GO:0035349,GO:0035350,GO:0006635,GO:0015908,GO:0043132	integral component of peroxisomal membrane|mitochondrion|peroxisomal membrane|peroxisome|ADP transmembrane transporter activity|AMP transmembrane transporter activity|ATP transmembrane transporter activity|chaperone binding|coenzyme A transmembrane transporter activity|FAD transmembrane transporter activity|FMN transmembrane transporter activity|NAD transmembrane transporter activity|ADP transpor…	mmu04146	Peroxisome	KOG0769	[C]	Predicted mitochondrial carrier protein	Energy production and conversion	KOG0769	U	FMN transmembrane transporter activity	Intracellular trafficking, secretion, and vesicular transport	PF00153	Mito_carr	Mitochondrial carrier protein
O70591	Pfdn2	18637	Prefoldin subunit 2	GO:0005737,GO:0005829,GO:0005739,GO:0005634,GO:0016272,GO:0001540,GO:0044183,GO:0051082,GO:1905907,GO:0051495,GO:0006457	cytoplasm|cytosol|mitochondrion|nucleus|prefoldin complex|amyloid-beta binding|protein folding chaperone|unfolded protein binding|negative regulation of amyloid fibril formation|positive regulation of cytoskeleton organization|protein folding			KOG4098	[O]	Molecular chaperone Prefoldin, subunit 2	Posttranslational modification, protein turnover, chaperones	KOG4098	S	protein binding involved in protein folding	Function unknown	PF01920	Prefoldin_2	Prefoldin subunit
O88271	Cfdp1	23837	Craniofacial development protein 1	GO:0005604,GO:0000776,GO:0007155,GO:2000270,GO:0042127,GO:0008360	basement membrane|kinetochore|cell adhesion|negative regulation of fibroblast apoptotic process|regulation of cell population proliferation|regulation of cell shape			KOG4776	[S]	Uncharacterized conserved protein BCNT	Function unknown	KOG4776	K	chromosome organization	Transcription	PF07572	BCNT	Bucentaur or craniofacial development
O88342	Wdr1	22388	WD repeat-containing protein 1	GO:0015629,GO:0030054,GO:0042995,GO:0005911,GO:0030864,GO:0043209,GO:0005886,GO:0002102,GO:0003779,GO:0051015,GO:0030036,GO:0030042,GO:0030043,GO:0043297,GO:0030865,GO:0042247,GO:0040011,GO:0045199,GO:0002446,GO:1990266,GO:0030220,GO:0030836,GO:0030834,GO:0008360,GO:0048713,GO:0060307,GO:0045214,GO:0007605	actin cytoskeleton|cell junction|cell projection|cell-cell junction|cortical actin cytoskeleton|myelin sheath|plasma membrane|podosome|actin binding|actin filament binding|actin cytoskeleton organization|actin filament depolymerization|actin filament fragmentation|apical junction assembly|cortical cytoskeleton organization|establishment of planar polarity of follicular epithelium|locomotion|maint…			KOG0318	[Z]	WD40 repeat stress protein/actin interacting protein	Cytoskeleton	KOG0318	S	positive regulation of actin filament depolymerization	Function unknown	PF00400	WD40	WD domain, G-beta repeat
O88351	Ikbkb	16150	Inhibitor of nuclear factor kappa-B kinase subunit beta	GO:0035631,GO:0005737,GO:0009898,GO:0005829,GO:0008385,GO:0043231,GO:0045121,GO:0005634,GO:0005524,GO:0042802,GO:0008384,GO:0046982,GO:0042803,GO:0004672,GO:0019901,GO:0019903,GO:0106310,GO:0004674,GO:0106311,GO:0044877,GO:0097110,GO:1990459,GO:0001782,GO:0071356,GO:0030866,GO:0007249,GO:0007252,GO:0070498,GO:1903347,GO:0035509,GO:0031175,GO:0018105,GO:2001259,GO:0008284,GO:0043123,GO:1901216,GO:…	CD40 receptor complex|cytoplasm|cytoplasmic side of plasma membrane|cytosol|IkappaB kinase complex|intracellular membrane-bounded organelle|membrane raft|nucleus|ATP binding|identical protein binding|IkappaB kinase activity|protein heterodimerization activity|protein homodimerization activity|protein kinase activity|protein kinase binding|protein phosphatase binding|protein serine kinase activity…	mmu04010,mmu04014,mmu04064,mmu04668,mmu04068,mmu04151,mmu04150,mmu04210,mmu04620,mmu04621,mmu04622,mmu04623,mmu04625,mmu04660,mmu04658,mmu04659,mmu04657,mmu04662,mmu04062,mmu04910,mmu04920,mmu04722,mmu04380,mmu05200,mmu05206,mmu05208,mmu05235,mmu05212,mmu05221,mmu05220,mmu05215,mmu05222,mmu05166,mmu05170,mmu05161,mmu05160,mmu05171,mmu05164,mmu05162,mmu05168,mmu05163,mmu05167,mmu05169,mmu05165,mmu…	MAPK signaling pathway|Ras signaling pathway|NF-kappa B signaling pathway|TNF signaling pathway|FoxO signaling pathway|PI3K-Akt signaling pathway|mTOR signaling pathway|Apoptosis|Toll-like receptor signaling pathway|NOD-like receptor signaling pathway|RIG-I-like receptor signaling pathway|Cytosolic DNA-sensing pathway|C-type lectin receptor signaling pathway|T cell receptor signaling pathway|Th1 …	KOG4250	[T]	TANK binding protein kinase TBK1	Signal transduction mechanisms	KOG4250	K	IkappaB kinase activity	Transcription	PF12179	IKKbetaNEMObind	I-kappa-kinase-beta NEMO binding domain
O88384	Vti1b	53612	Vesicle transport through interaction with t-SNAREs homolog 1B	GO:0031225,GO:0005829,GO:0031901,GO:0005789,GO:0012507,GO:0005794,GO:0016021,GO:0043231,GO:0031902,GO:0005765,GO:0043025,GO:0048471,GO:0055037,GO:0055038,GO:0031201,GO:0008021,GO:0031982,GO:0019869,GO:0005484,GO:0000149,GO:0006888,GO:0006896,GO:0006891,GO:0006623,GO:1903076,GO:0042147,GO:0048280	anchored component of membrane|cytosol|early endosome membrane|endoplasmic reticulum membrane|ER to Golgi transport vesicle membrane|Golgi apparatus|integral component of membrane|intracellular membrane-bounded organelle|late endosome membrane|lysosomal membrane|neuronal cell body|perinuclear region of cytoplasm|recycling endosome|recycling endosome membrane|SNARE complex|synaptic vesicle|vesicle…	mmu04130	SNARE interactions in vesicular transport	KOG1666	[U]	V-SNARE	Intracellular trafficking, secretion, and vesicular transport	KOG1666	D	vesicle fusion with Golgi apparatus	Cell cycle control, cell division, chromosome partitioning	PF05008	V-SNARE	Vesicle transport v-SNARE protein N-terminus
O88447	Klc1	16593	Kinesin light chain 1	GO:0030424,GO:0035253,GO:0005737,GO:0031410,GO:0005829,GO:0030426,GO:0005871,GO:0016020,GO:0043227,GO:0005874,GO:0043005,GO:0043025,GO:0031982,GO:0015631,GO:0008088,GO:0006886,GO:0007018,GO:0035418,GO:0035617	axon|ciliary rootlet|cytoplasm|cytoplasmic vesicle|cytosol|growth cone|kinesin complex|membrane|membrane-bounded organelle|microtubule|neuron projection|neuronal cell body|vesicle|tubulin binding|axo-dendritic transport|intracellular protein transport|microtubule-based movement|protein localization to synapse|stress granule disassembly	mmu05132,mmu05010,mmu05012,mmu05014,mmu05016,mmu05020,mmu05022	Salmonella infection|Alzheimer disease|Parkinson disease|Amyotrophic lateral sclerosis|Huntington disease|Prion disease|Pathways of neurodegeneration - multiple diseases	KOG1840	[Z]	Kinesin light chain	Cytoskeleton	KOG1840	C	determination of stomach left/right asymmetry	Energy production and conversion	PF00515	TPR_1	Tetratricopeptide repeat
O88456	Capns1	12336	Calpain small subunit 1	GO:0005829,GO:0016020,GO:0005886,GO:0005509,GO:0004198,GO:0044877	cytosol|membrane|plasma membrane|calcium ion binding|calcium-dependent cysteine-type endopeptidase activity|protein-containing complex binding			KOG0037	[T]	Ca2+-binding protein, EF-Hand protein superfamily	Signal transduction mechanisms	KOG0037	O	calcium-dependent cysteine-type endopeptidase activity	Posttranslational modification, protein turnover, chaperones	PF13833	EF-hand_8	EF-hand domain pair
O88477	Igf2bp1	140486	Insulin-like growth factor 2 mRNA-binding protein 1	GO:0030424,GO:0070937,GO:0005737,GO:0010494,GO:0005829,GO:0030425,GO:0043197,GO:0030175,GO:0030426,GO:0030027,GO:0043025,GO:0005654,GO:0005634,GO:0048471,GO:1990904,GO:0003730,GO:0048027,GO:0003729,GO:0045182,GO:0070934,GO:0140059,GO:0051028,GO:0017148,GO:0007399,GO:0097150,GO:0022013,GO:0010468,GO:0010610,GO:0051252,GO:0006403	axon|CRD-mediated mRNA stability complex|cytoplasm|cytoplasmic stress granule|cytosol|dendrite|dendritic spine|filopodium|growth cone|lamellipodium|neuronal cell body|nucleoplasm|nucleus|perinuclear region of cytoplasm|ribonucleoprotein complex|mRNA 3'-UTR binding|mRNA 5'-UTR binding|mRNA binding|translation regulator activity|CRD-mediated mRNA stabilization|dendrite arborization|mRNA transport|n…	mmu05206	MicroRNAs in cancer	KOG2193	[AR]	IGF-II mRNA-binding protein IMP, contains RRM and KH domains	RNA processing and modification |General function prediction only	KOG2193	S	pallium cell proliferation in forebrain	Function unknown	PF00013	KH_1	KH domain
O88487	Dync1i2	13427	Cytoplasmic dynein 1 intermediate chain 2	GO:0005737,GO:0005868,GO:0005874,GO:0036157,GO:0031982,GO:0045504,GO:0045503,GO:0044877,GO:0007018,GO:0010977,GO:0010970	cytoplasm|cytoplasmic dynein complex|microtubule|outer dynein arm|vesicle|dynein heavy chain binding|dynein light chain binding|protein-containing complex binding|microtubule-based movement|negative regulation of neuron projection development|transport along microtubule	mmu04145,mmu04962,mmu05132	Phagosome|Vasopressin-regulated water reabsorption|Salmonella infection	KOG1587	[Z]	Cytoplasmic dynein intermediate chain	Cytoskeleton	KOG1587	U	dynein heavy chain binding	Intracellular trafficking, secretion, and vesicular transport	PF00400	WD40	WD domain, G-beta repeat
O88491	Nsd1	18193	Histone-lysine N-methyltransferase, H3 lysine-36 specific	GO:0000785,GO:0035097,GO:0005634,GO:0050681,GO:0003682,GO:0030331,GO:0042054,GO:0046975,GO:0042799,GO:0042974,GO:0046965,GO:0000978,GO:0046966,GO:0003712,GO:0003714,GO:0008270,GO:0001702,GO:0016571,GO:0000122,GO:0045893,GO:0000414,GO:0033135,GO:1903025,GO:0006355	chromatin|histone methyltransferase complex|nucleus|androgen receptor binding|chromatin binding|estrogen receptor binding|histone methyltransferase activity|histone methyltransferase activity (H3-K36 specific)|histone methyltransferase activity (H4-K20 specific)|retinoic acid receptor binding|retinoid X receptor binding|RNA polymerase II cis-regulatory region sequence-specific DNA binding|thyroid…	mmu00310	Lysine degradation	KOG1081	[K]	Transcription factor NSD1 and related SET domain proteins	Transcription	KOG1081	G	histone-lysine N-methyltransferase activity	Carbohydrate transport and metabolism	PF00855	PWWP	PWWP domain
O88522	Ikbkg	16151	NF-kappa-B essential modulator	GO:0005737,GO:0005829,GO:0008385,GO:0072686,GO:0005634,GO:0032991,GO:0000922,GO:0000151,GO:0042802,GO:0070530,GO:1990450,GO:0046872,GO:0042975,GO:0019904,GO:0046982,GO:0042803,GO:0044877,GO:1990459,GO:0031625,GO:0007250,GO:0043276,GO:0001782,GO:0006974,GO:0051650,GO:1902236,GO:0010628,GO:0043123,GO:0016239,GO:0051092,GO:0050862,GO:0045944,GO:0065003,GO:0043122	cytoplasm|cytosol|IkappaB kinase complex|mitotic spindle|nucleus|protein-containing complex|spindle pole|ubiquitin ligase complex|identical protein binding|K63-linked polyubiquitin modification-dependent protein binding|linear polyubiquitin binding|metal ion binding|peroxisome proliferator activated receptor binding|protein domain specific binding|protein heterodimerization activity|protein homod…	mmu04010,mmu04014,mmu04064,mmu04668,mmu04151,mmu04210,mmu04620,mmu04621,mmu04622,mmu04623,mmu04625,mmu04660,mmu04658,mmu04659,mmu04657,mmu04662,mmu04062,mmu04920,mmu04380,mmu05200,mmu05208,mmu05203,mmu05235,mmu05212,mmu05221,mmu05220,mmu05215,mmu05222,mmu05166,mmu05170,mmu05161,mmu05160,mmu05171,mmu05164,mmu05162,mmu05168,mmu05163,mmu05167,mmu05169,mmu05165,mmu05132,mmu05135,mmu05145,mmu05142,mmu…	MAPK signaling pathway|Ras signaling pathway|NF-kappa B signaling pathway|TNF signaling pathway|PI3K-Akt signaling pathway|Apoptosis|Toll-like receptor signaling pathway|NOD-like receptor signaling pathway|RIG-I-like receptor signaling pathway|Cytosolic DNA-sensing pathway|C-type lectin receptor signaling pathway|T cell receptor signaling pathway|Th1 and Th2 cell differentiation|Th17 cell differe…					ENOG502R4ZD	A	linear polyubiquitin binding	RNA processing and modification	PF11577	NEMO	NF-kappa-B essential modulator NEMO
O88531	Ppt1	19063	Palmitoyl-protein thioesterase 1	GO:0030424,GO:0005829,GO:0030425,GO:0005576,GO:0005615,GO:0005794,GO:0043231,GO:0005764,GO:0045121,GO:0043005,GO:0043025,GO:0005634,GO:0045202,GO:0008021,GO:0035727,GO:0008474,GO:0016290,GO:0120146,GO:0016790,GO:0008344,GO:0008306,GO:0007420,GO:0044265,GO:0044257,GO:0007625,GO:0016042,GO:0007042,GO:0007040,GO:0031579,GO:0043066,GO:0030308,GO:0043524,GO:0007399,GO:0007269,GO:0006907,GO:0048549,GO:…	axon|cytosol|dendrite|extracellular region|extracellular space|Golgi apparatus|intracellular membrane-bounded organelle|lysosome|membrane raft|neuron projection|neuronal cell body|nucleus|synapse|synaptic vesicle|lysophosphatidic acid binding|palmitoyl-(protein) hydrolase activity|palmitoyl-CoA hydrolase activity|sulfatide binding|thiolester hydrolase activity|adult locomotory behavior|associativ…	mmu00062,mmu04142	Fatty acid elongation|Lysosome	KOG2541	[IO]	Palmitoyl protein thioesterase	Lipid transport and metabolism |Posttranslational modification, protein turnover, chaperones	KOG2541	I	palmitoyl-(protein) hydrolase activity	Lipid transport and metabolism	PF02089	Palm_thioest	Palmitoyl protein thioesterase
O88543	Cops3	26572	COP9 signalosome complex subunit 3	GO:0008180,GO:0005829,GO:0005654,GO:0001701,GO:0000338,GO:0006511	COP9 signalosome|cytosol|nucleoplasm|in utero embryonic development|protein deneddylation|ubiquitin-dependent protein catabolic process			KOG2582	[OT]	COP9 signalosome, subunit CSN3	Posttranslational modification, protein turnover, chaperones |Signal transduction mechanisms	KOG2582	O	protein deneddylation	Posttranslational modification, protein turnover, chaperones	PF01399	PCI	PCI domain
O88544	Cops4	26891	COP9 signalosome complex subunit 4	GO:0030054,GO:0008180,GO:0005829,GO:0016607,GO:0008021,GO:0000338	cell junction|COP9 signalosome|cytosol|nuclear speck|synaptic vesicle|protein deneddylation			KOG1497	[OT]	COP9 signalosome, subunit CSN4	Posttranslational modification, protein turnover, chaperones |Signal transduction mechanisms	KOG1497	O	protein deneddylation	Posttranslational modification, protein turnover, chaperones	PF01399	PCI	PCI domain
O88545	Cops6	26893	COP9 signalosome complex subunit 6	GO:0008180,GO:0005737,GO:0005654,GO:0070122,GO:0008237,GO:0000338	COP9 signalosome|cytoplasm|nucleoplasm|isopeptidase activity|metallopeptidase activity|protein deneddylation			KOG3050	[OT]	COP9 signalosome, subunit CSN6	Posttranslational modification, protein turnover, chaperones |Signal transduction mechanisms	KOG3050	V	protein deneddylation	Defense mechanisms	PF01398	JAB	JAB1/Mov34/MPN/PAD-1 ubiquitin protease
O88569	Hnrnpa2b1	53379	Heterogeneous nuclear ribonucleoproteins A2/B1	GO:0015030,GO:0071013,GO:0000785,GO:0000781,GO:0005737,GO:0070062,GO:0098978,GO:0043005,GO:0043025,GO:0071598,GO:0016363,GO:0005654,GO:0005634,GO:0043204,GO:0099524,GO:1990904,GO:0005681,GO:0070182,GO:0098505,GO:0042802,GO:0035198,GO:0003730,GO:1990715,GO:1990247,GO:0097157,GO:0001069,GO:0003723,GO:0043047,GO:0044806,GO:1990428,GO:0006406,GO:0006397,GO:0000398,GO:0048025,GO:0000122,GO:1905663,GO:…	Cajal body|catalytic step 2 spliceosome|chromatin|chromosome, telomeric region|cytoplasm|extracellular exosome|glutamatergic synapse|neuron projection|neuronal cell body|neuronal ribonucleoprotein granule|nuclear matrix|nucleoplasm|nucleus|perikaryon|postsynaptic cytosol|ribonucleoprotein complex|spliceosomal complex|DNA polymerase binding|G-rich strand telomeric DNA binding|identical protein bin…	mmu05014	Amyotrophic lateral sclerosis	KOG0118	[R]	FOG: RRM domain	General function prediction only	KOG0118	S	mRNA processing	Function unknown	PF00076	RRM_1	RNA recognition motif. (a.k.a. RRM, RBD, or RNP domain)
O88587	Comt	12846	Catechol O-methyltransferase	GO:0030424,GO:0044297,GO:0005829,GO:0030425,GO:0043197,GO:0016021,GO:0043231,GO:0016020,GO:0005739,GO:0045211,GO:0016206,GO:0102084,GO:0000287,GO:0008171,GO:0102938,GO:0042424,GO:0016036,GO:0032502,GO:0042420,GO:0042417,GO:0008210,GO:0007565,GO:0007612,GO:0032259,GO:0048609,GO:0045963,GO:0035814,GO:0048662,GO:0042135,GO:0050668,GO:0051930,GO:0042493,GO:0043627,GO:0032496,GO:0014070,GO:0048265,GO:…	axon|cell body|cytosol|dendrite|dendritic spine|integral component of membrane|intracellular membrane-bounded organelle|membrane|mitochondrion|postsynaptic membrane|catechol O-methyltransferase activity|L-dopa O-methyltransferase activity|magnesium ion binding|O-methyltransferase activity|orcinol O-methyltransferase activity|catecholamine catabolic process|cellular response to phosphate starvatio…	mmu00140,mmu00350,mmu04728	Steroid hormone biosynthesis|Tyrosine metabolism|Dopaminergic synapse	KOG1663	[Q]	O-methyltransferase	Secondary metabolites biosynthesis, transport and catabolism	KOG1663	P	O-methyltransferase activity	Inorganic ion transport and metabolism	PF01596	Methyltransf_3	O-methyltransferase
O88630	Gosr1	53334	Golgi SNAP receptor complex member 1	GO:0005801,GO:0005829,GO:0005794,GO:0005797,GO:0000139,GO:0016021,GO:0031201,GO:0005484,GO:0006888,GO:0015031,GO:0048209,GO:0042147,GO:0006906	cis-Golgi network|cytosol|Golgi apparatus|Golgi medial cisterna|Golgi membrane|integral component of membrane|SNARE complex|SNAP receptor activity|endoplasmic reticulum to Golgi vesicle-mediated transport|protein transport|regulation of vesicle targeting, to, from or within Golgi|retrograde transport, endosome to Golgi|vesicle fusion	mmu04130	SNARE interactions in vesicular transport	KOG3208	[U]	SNARE protein GS28	Intracellular trafficking, secretion, and vesicular transport	KOG3208	U	regulation of vesicle targeting, to, from or within Golgi	Intracellular trafficking, secretion, and vesicular transport	PF12352	V-SNARE_C	Snare region anchored in the vesicle membrane C-terminus
O88685	Psmc3	19182	26S proteasome regulatory subunit 6A	GO:0005737,GO:0005634,GO:0000932,GO:0048471,GO:0022624,GO:0000502,GO:0008540,GO:0005524,GO:0042802,GO:0036402,GO:0001824,GO:0043921,GO:0045899,GO:0045944,GO:0030163	cytoplasm|nucleus|P-body|perinuclear region of cytoplasm|proteasome accessory complex|proteasome complex|proteasome regulatory particle, base subcomplex|ATP binding|identical protein binding|proteasome-activating activity|blastocyst development|modulation by host of viral transcription|positive regulation of RNA polymerase II transcription preinitiation complex assembly|positive regulation of tra…	mmu03050,mmu05169,mmu05010,mmu05012,mmu05014,mmu05016,mmu05017,mmu05020,mmu05022	Proteasome|Epstein-Barr virus infection|Alzheimer disease|Parkinson disease|Amyotrophic lateral sclerosis|Huntington disease|Spinocerebellar ataxia|Prion disease|Pathways of neurodegeneration - multiple diseases	KOG0652	[O]	26S proteasome regulatory complex, ATPase RPT5	Posttranslational modification, protein turnover, chaperones	KOG0652	O	Belongs to the AAA ATPase family	Posttranslational modification, protein turnover, chaperones	PF00004	AAA	ATPase family associated with various cellular activities (AAA)
O88696	Clpp	53895	ATP-dependent Clp protease proteolytic subunit, mitochondrial	GO:0009368,GO:0005759,GO:0005739,GO:0004176,GO:0051117,GO:0004175,GO:0042802,GO:0004252,GO:0033619,GO:0006515,GO:0051603	endopeptidase Clp complex|mitochondrial matrix|mitochondrion|ATP-dependent peptidase activity|ATPase binding|endopeptidase activity|identical protein binding|serine-type endopeptidase activity|membrane protein proteolysis|protein quality control for misfolded or incompletely synthesized proteins|proteolysis involved in cellular protein catabolic process			KOG0840	[O]	ATP-dependent Clp protease, proteolytic subunit	Posttranslational modification, protein turnover, chaperones	KOG0840	O	serine-type endopeptidase activity	Posttranslational modification, protein turnover, chaperones	PF00574	CLP_protease	Clp protease
O88738	Birc6	12211	Baculoviral IAP repeat-containing protein 6	GO:0005768,GO:0090543,GO:0016020,GO:0005815,GO:0030496,GO:0005634,GO:0000922,GO:0005802,GO:0004869,GO:0061631,GO:0004842,GO:0006915,GO:0007049,GO:0051301,GO:0060711,GO:0043066,GO:2001237,GO:0001890,GO:0008284,GO:0016567,GO:0042127,GO:0032465,GO:0060712,GO:0006511	endosome|Flemming body|membrane|microtubule organizing center|midbody|nucleus|spindle pole|trans-Golgi network|cysteine-type endopeptidase inhibitor activity|ubiquitin conjugating enzyme activity|ubiquitin-protein transferase activity|apoptotic process|cell cycle|cell division|labyrinthine layer development|negative regulation of apoptotic process|negative regulation of extrinsic apoptotic signal…	mmu04120,mmu04215	Ubiquitin mediated proteolysis|Apoptosis - multiple species	KOG0895	[O]	Ubiquitin-conjugating enzyme	Posttranslational modification, protein turnover, chaperones	KOG0895	O	ubiquitin-protein transferase activity	Posttranslational modification, protein turnover, chaperones	PF00179	UQ_con	Ubiquitin-conjugating enzyme
O88746	Tom1	21968	Target of Myb protein 1	GO:0005737,GO:0005829,GO:0005769,GO:0005768,GO:0016020,GO:0030276,GO:0035091,GO:0043130,GO:0015031,GO:0007165	cytoplasm|cytosol|early endosome|endosome|membrane|clathrin binding|phosphatidylinositol binding|ubiquitin binding|protein transport|signal transduction			KOG1087	[U]	Cytosolic sorting protein GGA2/TOM1	Intracellular trafficking, secretion, and vesicular transport	KOG1087	S	intracellular protein transport	Function unknown	PF00790	VHS	VHS domain
O88783	F5	14067	Coagulation factor V	GO:0005783,GO:0005576,GO:0005615,GO:0005794,GO:0031091,GO:0005507,GO:0008015,GO:0007596	endoplasmic reticulum|extracellular region|extracellular space|Golgi apparatus|platelet alpha granule|copper ion binding|blood circulation|blood coagulation	mmu04610	Complement and coagulation cascades					ENOG502QSUG	S	coagulation	Function unknown	PF00754	F5_F8_type_C	F5/8 type C domain
O88786	Il13ra2	16165	Interleukin-13 receptor subunit alpha-2	GO:0009897,GO:0005576,GO:0016021,GO:0043235,GO:0019955,GO:0004896,GO:0019221,GO:0016064,GO:0002638,GO:0043305	external side of plasma membrane|extracellular region|integral component of membrane|receptor complex|cytokine binding|cytokine receptor activity|cytokine-mediated signaling pathway|immunoglobulin mediated immune response|negative regulation of immunoglobulin production|negative regulation of mast cell degranulation	mmu04630,mmu04060	JAK-STAT signaling pathway|Cytokine-cytokine receptor interaction					ENOG502RV4W	S	negative regulation of mast cell degranulation	Function unknown	PF09240	IL6Ra-bind	Interleukin-6 receptor alpha chain, binding
O88844	Idh1	15926	Isocitrate dehydrogenase [NADP] cytoplasmic	GO:0005737,GO:0005829,GO:0005739,GO:0005777,GO:0042802,GO:0004450,GO:0004448,GO:0000287,GO:0051287,GO:0050661,GO:0042803,GO:0006103,GO:0008585,GO:0006749,GO:0006097,GO:0006102,GO:0006739,GO:0071071,GO:0060696,GO:0014070,GO:0006979,GO:0048545,GO:0006099	cytoplasm|cytosol|mitochondrion|peroxisome|identical protein binding|isocitrate dehydrogenase (NADP+) activity|isocitrate dehydrogenase activity|magnesium ion binding|NAD binding|NADP binding|protein homodimerization activity|2-oxoglutarate metabolic process|female gonad development|glutathione metabolic process|glyoxylate cycle|isocitrate metabolic process|NADP metabolic process|regulation of ph…	mmu00020,mmu00480,mmu04146,mmu05230	Citrate cycle (TCA cycle)|Glutathione metabolism|Peroxisome|Central carbon metabolism in cancer	KOG1526	[C]	NADP-dependent isocitrate dehydrogenase	Energy production and conversion	KOG1526	C	isocitrate dehydrogenase (NADP+) activity	Energy production and conversion	PF00180	Iso_dh	Isocitrate/isopropylmalate dehydrogenase
O88935	Syn1	20964	Synapsin-1	GO:0098993,GO:0030424,GO:0060203,GO:0005856,GO:0005829,GO:0030425,GO:0098850,GO:0005794,GO:0043229,GO:0043209,GO:0014069,GO:0098793,GO:0048786,GO:0098685,GO:0045202,GO:0008021,GO:0030672,GO:0000795,GO:0003779,GO:0005524,GO:0048306,GO:0042802,GO:0019901,GO:0048666,GO:0007269,GO:0048172,GO:0098693,GO:0050808,GO:0097091,GO:0099504	anchored component of synaptic vesicle membrane|axon|clathrin-sculpted glutamate transport vesicle membrane|cytoskeleton|cytosol|dendrite|extrinsic component of synaptic vesicle membrane|Golgi apparatus|intracellular organelle|myelin sheath|postsynaptic density|presynapse|presynaptic active zone|Schaffer collateral - CA1 synapse|synapse|synaptic vesicle|synaptic vesicle membrane|synaptonemal comp…			KOG3895	[TU]	Synaptic vesicle protein Synapsin	Signal transduction mechanisms |Intracellular trafficking, secretion, and vesicular transport	KOG3895	S	signal release from synapse	Function unknown	PF02078	Synapsin	Synapsin, N-terminal domain
O88952	Lin7c	22343	Protein lin-7 homolog C	GO:0016323,GO:0005923,GO:0005911,GO:0005737,GO:0098978,GO:0097025,GO:0005886,GO:0098839,GO:0098793,GO:0045202,GO:0030658,GO:0008092,GO:0097016,GO:0030165,GO:0019904,GO:0006887,GO:0045199,GO:0002011,GO:0007269,GO:1903361,GO:0015031	basolateral plasma membrane|bicellular tight junction|cell-cell junction|cytoplasm|glutamatergic synapse|MPP7-DLG1-LIN7 complex|plasma membrane|postsynaptic density membrane|presynapse|synapse|transport vesicle membrane|cytoskeletal protein binding|L27 domain binding|PDZ domain binding|protein domain specific binding|exocytosis|maintenance of epithelial cell apical/basal polarity|morphogenesis of…			KOG3550	[W]	Receptor targeting protein Lin-7	Extracellular structures	KOG3550	J	Lin-7 homolog	Translation, ribosomal structure and biogenesis	PF00595	PDZ	PDZ domain
O88967	Yme1l1	27377	ATP-dependent zinc metalloprotease YME1L1	GO:0016021,GO:0005743,GO:0005739,GO:0016604,GO:0005524,GO:0004176,GO:0046872,GO:0004222,GO:0008283,GO:0035694,GO:0034982,GO:0007005,GO:0043066,GO:0034214,GO:0006515,GO:0006508	integral component of membrane|mitochondrial inner membrane|mitochondrion|nuclear body|ATP binding|ATP-dependent peptidase activity|metal ion binding|metalloendopeptidase activity|cell population proliferation|mitochondrial protein catabolic process|mitochondrial protein processing|mitochondrion organization|negative regulation of apoptotic process|protein hexamerization|protein quality control f…			KOG0734	[O]	AAA+-type ATPase containing the peptidase M41 domain	Posttranslational modification, protein turnover, chaperones	KOG0734	O	ATP-dependent peptidase activity	Posttranslational modification, protein turnover, chaperones	PF00004	AAA	ATPase family associated with various cellular activities (AAA)
O89001	Cpd	12874	Carboxypeptidase D	GO:0005615,GO:0016021,GO:0043231,GO:0005634,GO:0048471,GO:0005886,GO:0005802,GO:0004181,GO:0051721,GO:0044877,GO:0008270,GO:0006518,GO:0016485	extracellular space|integral component of membrane|intracellular membrane-bounded organelle|nucleus|perinuclear region of cytoplasm|plasma membrane|trans-Golgi network|metallocarboxypeptidase activity|protein phosphatase 2A binding|protein-containing complex binding|zinc ion binding|peptide metabolic process|protein processing			KOG2649	[R]	Zinc carboxypeptidase	General function prediction only	KOG2649	S	metallocarboxypeptidase activity	Function unknown	PF00246	Peptidase_M14	Zinc carboxypeptidase
O89023	Tpp1	12751	Tripeptidyl-peptidase 1	GO:0005794,GO:0005764,GO:0042470,GO:0045121,GO:0005739,GO:0055037,GO:0004175,GO:0035727,GO:0046872,GO:0008233,GO:0042277,GO:0004252,GO:0008236,GO:0120146,GO:0008240,GO:0045453,GO:0007417,GO:0030855,GO:1905146,GO:0007040,GO:0007399,GO:0050885,GO:0043171,GO:0070198,GO:0006508	Golgi apparatus|lysosome|melanosome|membrane raft|mitochondrion|recycling endosome|endopeptidase activity|lysophosphatidic acid binding|metal ion binding|peptidase activity|peptide binding|serine-type endopeptidase activity|serine-type peptidase activity|sulfatide binding|tripeptidyl-peptidase activity|bone resorption|central nervous system development|epithelial cell differentiation|lysosomal pr…	mmu04142	Lysosome					ENOG502QR6D	O	tripeptidyl-peptidase activity	Posttranslational modification, protein turnover, chaperones	PF00082	Peptidase_S8	Subtilase family
O89079	Cope	59042	Coatomer subunit epsilon	GO:0030126,GO:0030137,GO:0005794,GO:0000139,GO:0005654,GO:0005198,GO:0006888,GO:0006891,GO:0099612,GO:0015031,GO:0006890	COPI vesicle coat|COPI-coated vesicle|Golgi apparatus|Golgi membrane|nucleoplasm|structural molecule activity|endoplasmic reticulum to Golgi vesicle-mediated transport|intra-Golgi vesicle-mediated transport|protein localization to axon|protein transport|retrograde vesicle-mediated transport, Golgi to endoplasmic reticulum			KOG3081	[U]	Vesicle coat complex COPI, epsilon subunit	Intracellular trafficking, secretion, and vesicular transport	KOG3081	U	retrograde vesicle-mediated transport, Golgi to ER	Intracellular trafficking, secretion, and vesicular transport	PF04733	Coatomer_E	Coatomer epsilon subunit
O89086	Rbm3	19652	RNA-binding protein 3	GO:0005737,GO:0030425,GO:0005654,GO:0005634,GO:0005681,GO:0043023,GO:0003723,GO:0048026,GO:0045727,GO:0035196,GO:0006417,GO:0009409,GO:0006412	cytoplasm|dendrite|nucleoplasm|nucleus|spliceosomal complex|ribosomal large subunit binding|RNA binding|positive regulation of mRNA splicing, via spliceosome|positive regulation of translation|production of miRNAs involved in gene silencing by miRNA|regulation of translation|response to cold|translation			KOG0118	[R]	FOG: RRM domain	General function prediction only	KOG0118	S	mRNA processing	Function unknown	PF00076	RRM_1	RNA recognition motif. (a.k.a. RRM, RBD, or RNP domain)
O89090	Sp1	20683	Transcription factor Sp1	GO:0000785,GO:0005737,GO:0000791,GO:0005654,GO:0005634,GO:0032993,GO:0017053,GO:0043425,GO:0000987,GO:0003677,GO:0001228,GO:0003700,GO:0000981,GO:0140297,GO:0003690,GO:0035035,GO:0042826,GO:0071837,GO:0042802,GO:0046872,GO:0008022,GO:0042803,GO:0000978,GO:0000977,GO:0061629,GO:0043565,GO:1990837,GO:0000976,GO:0032869,GO:0060216,GO:0048596,GO:0001892,GO:0060136,GO:0048706,GO:0043353,GO:0001701,GO:…	chromatin|cytoplasm|euchromatin|nucleoplasm|nucleus|protein-DNA complex|transcription repressor complex|bHLH transcription factor binding|cis-regulatory region sequence-specific DNA binding|DNA binding|DNA-binding transcription activator activity, RNA polymerase II-specific|DNA-binding transcription factor activity|DNA-binding transcription factor activity, RNA polymerase II-specific|DNA-binding …	mmu04350,mmu04137,mmu04915,mmu04928,mmu04927,mmu05200,mmu05202,mmu05231,mmu05224,mmu05163,mmu05016,mmu05017,mmu05415,mmu04934,mmu01522	TGF-beta signaling pathway|Mitophagy - animal|Estrogen signaling pathway|Parathyroid hormone synthesis, secretion and action|Cortisol synthesis and secretion|Pathways in cancer|Transcriptional misregulation in cancer|Choline metabolism in cancer|Breast cancer|Human cytomegalovirus infection|Huntington disease|Spinocerebellar ataxia|Diabetic cardiomyopathy|Cushing syndrome|Endocrine resistance	KOG1721	[R]	FOG: Zn-finger	General function prediction only	KOG1721	B	DNA binding	Chromatin structure and dynamics	PF00096	zf-C2H2	Zinc finger, C2H2 type
O89110	Casp8	12370	Caspase-8	GO:0031265,GO:0044297,GO:0005737,GO:0005829,GO:0031264,GO:0045121,GO:0005739,GO:0043005,GO:0030690,GO:0005654,GO:0005634,GO:0005886,GO:0032991,GO:0097342,GO:0004197,GO:0097153,GO:0097199,GO:0097200,GO:0035877,GO:0005123,GO:0004175,GO:0042802,GO:0008233,GO:0044877,GO:0097110,GO:0005164,GO:0031625,GO:0097202,GO:0006919,GO:0001525,GO:0006915,GO:0097190,GO:0048738,GO:0097194,GO:0097191,GO:0008625,GO:…	CD95 death-inducing signaling complex|cell body|cytoplasm|cytosol|death-inducing signaling complex|membrane raft|mitochondrion|neuron projection|Noc1p-Noc2p complex|nucleoplasm|nucleus|plasma membrane|protein-containing complex|ripoptosome|cysteine-type endopeptidase activity|cysteine-type endopeptidase activity involved in apoptotic process|cysteine-type endopeptidase activity involved in apopto…	mmu04668,mmu04210,mmu04215,mmu04217,mmu04115,mmu04620,mmu04621,mmu04622,mmu04625,mmu04657,mmu05200,mmu05203,mmu05170,mmu05161,mmu05160,mmu05164,mmu05162,mmu05168,mmu05163,mmu05167,mmu05169,mmu05165,mmu05132,mmu05134,mmu05152,mmu05145,mmu05142,mmu05010,mmu05016,mmu05022,mmu05417,mmu05416,mmu04936,mmu04932,mmu01524	TNF signaling pathway|Apoptosis|Apoptosis - multiple species|Necroptosis|p53 signaling pathway|Toll-like receptor signaling pathway|NOD-like receptor signaling pathway|RIG-I-like receptor signaling pathway|C-type lectin receptor signaling pathway|IL-17 signaling pathway|Pathways in cancer|Viral carcinogenesis|Human immunodeficiency virus 1 infection|Hepatitis B|Hepatitis C|Influenza A|Measles|Her…	KOG3573	[D]	Caspase, apoptotic cysteine protease	Cell cycle control, cell division, chromosome partitioning	KOG3573	O	cysteine-type endopeptidase activity involved in apoptotic process	Posttranslational modification, protein turnover, chaperones	PF00656	Peptidase_C14	Caspase domain
P00375	Dhfr	13361	Dihydrofolate reductase	GO:0005737,GO:0005829,GO:0005739,GO:0004146,GO:0051871,GO:0008144,GO:0005542,GO:0051870,GO:0003729,GO:0050661,GO:0070402,GO:1990825,GO:0000900,GO:0031103,GO:0046452,GO:0046655,GO:0006545,GO:0017148,GO:0006730,GO:0051000,GO:2000121,GO:0031427,GO:0035094,GO:0006729,GO:0046654,GO:0046653	cytoplasm|cytosol|mitochondrion|dihydrofolate reductase activity|dihydrofolic acid binding|drug binding|folic acid binding|methotrexate binding|mRNA binding|NADP binding|NADPH binding|sequence-specific mRNA binding|translation repressor activity, mRNA regulatory element binding|axon regeneration|dihydrofolate metabolic process|folic acid metabolic process|glycine biosynthetic process|negative reg…	mmu00790,mmu00670,mmu01523	Folate biosynthesis|One carbon pool by folate|Antifolate resistance	KOG1324	[H]	Dihydrofolate reductase	Coenzyme transport and metabolism	KOG1324	H	dihydrofolate reductase activity	Coenzyme transport and metabolism	PF00186	DHFR_1	Dihydrofolate reductase
P00405	Mtco2	17709	Cytochrome c oxidase subunit 2	GO:0016021,GO:0005743,GO:0005739,GO:0045277,GO:0005507,GO:0004129,GO:0042773,GO:0007595,GO:2001171,GO:0010729,GO:0010940,GO:0009409	integral component of membrane|mitochondrial inner membrane|mitochondrion|respiratory chain complex IV|copper ion binding|cytochrome-c oxidase activity|ATP synthesis coupled electron transport|lactation|positive regulation of ATP biosynthetic process|positive regulation of hydrogen peroxide biosynthetic process|positive regulation of necrotic cell death|response to cold	mmu00190,mmu04260,mmu04714,mmu05208,mmu05010,mmu05012,mmu05014,mmu05016,mmu05020,mmu05022,mmu05415,mmu04932	Oxidative phosphorylation|Cardiac muscle contraction|Thermogenesis|Chemical carcinogenesis - reactive oxygen species|Alzheimer disease|Parkinson disease|Amyotrophic lateral sclerosis|Huntington disease|Prion disease|Pathways of neurodegeneration - multiple diseases|Diabetic cardiomyopathy|Non-alcoholic fatty liver disease	KOG4767	[C]	Cytochrome c oxidase, subunit II, and related proteins	Energy production and conversion	KOG4767	C	oxidoreductase activity, acting on a heme group of donors, oxygen as acceptor	Energy production and conversion	PF00116	COX2	Cytochrome C oxidase subunit II, periplasmic domain
P00493	Hprt1	15452	Hypoxanthine-guanine phosphoribosyltransferase	GO:0005737,GO:0005829,GO:0052657,GO:0004422,GO:0042802,GO:0000287,GO:0000166,GO:0046083,GO:0006168,GO:0021954,GO:0021895,GO:0048813,GO:0042417,GO:0046038,GO:0032263,GO:0007625,GO:0006178,GO:0046100,GO:0043103,GO:0046040,GO:0032264,GO:0007626,GO:0046651,GO:0045964,GO:0051289,GO:0006164,GO:0006166,GO:0001975,GO:0021756,GO:0001913	cytoplasm|cytosol|guanine phosphoribosyltransferase activity|hypoxanthine phosphoribosyltransferase activity|identical protein binding|magnesium ion binding|nucleotide binding|adenine metabolic process|adenine salvage|central nervous system neuron development|cerebral cortex neuron differentiation|dendrite morphogenesis|dopamine metabolic process|GMP catabolic process|GMP salvage|grooming behavio…	mmu00230,mmu00983	Purine metabolism|Drug metabolism - other enzymes	KOG3367	[F]	Hypoxanthine-guanine phosphoribosyltransferase	Nucleotide transport and metabolism	KOG3367	F	guanine phosphoribosyltransferase activity	Nucleotide transport and metabolism	PF00156	Pribosyltran	Phosphoribosyl transferase domain
P01027	C3	12266	Complement C3	GO:0009986,GO:0005576,GO:0005615,GO:0032991,GO:0031715,GO:0004866,GO:0008289,GO:0097242,GO:0007596,GO:1905114,GO:0006956,GO:0006957,GO:0006958,GO:0097278,GO:0150062,GO:0006631,GO:0006954,GO:0016322,GO:0035846,GO:0001970,GO:0045766,GO:2000427,GO:0048639,GO:0070374,GO:0045745,GO:0010828,GO:0010884,GO:0050766,GO:0060100,GO:0001934,GO:0048260,GO:0001798,GO:0010575,GO:0010866,GO:0009617,GO:0150064	cell surface|extracellular region|extracellular space|protein-containing complex|C5L2 anaphylatoxin chemotactic receptor binding|endopeptidase inhibitor activity|lipid binding|amyloid-beta clearance|blood coagulation|cell surface receptor signaling pathway involved in cell-cell signaling|complement activation|complement activation, alternative pathway|complement activation, classical pathway|comp…	mmu04080,mmu04145,mmu04610,mmu04613,mmu05203,mmu05171,mmu05168,mmu05167,mmu05133,mmu05134,mmu05150,mmu05152,mmu05140,mmu05142,mmu05322,mmu04936	Neuroactive ligand-receptor interaction|Phagosome|Complement and coagulation cascades|Neutrophil extracellular trap formation|Viral carcinogenesis|Coronavirus disease - COVID-19|Herpes simplex virus 1 infection|Kaposi sarcoma-associated herpesvirus infection|Pertussis|Legionellosis|Staphylococcus aureus infection|Tuberculosis|Leishmaniasis|Chagas disease|Systemic lupus erythematosus|Alcoholic liv…	KOG1366	[O]	Alpha-macroglobulin	Posttranslational modification, protein turnover, chaperones	KOG1366	J	endopeptidase inhibitor activity	Translation, ribosomal structure and biogenesis	PF00207	A2M	Alpha-2-macroglobulin family
P01029	C4b	12268	Complement C4-B	GO:0030424,GO:0030425,GO:0005576,GO:0005615,GO:0043025,GO:0106139,GO:0045202,GO:0030246,GO:0001848,GO:0001849,GO:0004866,GO:0006956,GO:0006958,GO:0016064,GO:0006954,GO:0045087	axon|dendrite|extracellular region|extracellular space|neuronal cell body|symbiont cell surface|synapse|carbohydrate binding|complement binding|complement component C1q complex binding|endopeptidase inhibitor activity|complement activation|complement activation, classical pathway|immunoglobulin mediated immune response|inflammatory response|innate immune response	mmu04610,mmu05171,mmu05133,mmu05150,mmu05322,mmu04936	Complement and coagulation cascades|Coronavirus disease - COVID-19|Pertussis|Staphylococcus aureus infection|Systemic lupus erythematosus|Alcoholic liver disease	KOG1366	[O]	Alpha-macroglobulin	Posttranslational modification, protein turnover, chaperones	KOG1366	J	endopeptidase inhibitor activity	Translation, ribosomal structure and biogenesis	PF00207	A2M	Alpha-2-macroglobulin family
P01831	Thy1	21838	Thy-1 membrane glycoprotein	GO:0031362,GO:0046658,GO:0016324,GO:0030673,GO:0009986,GO:0005829,GO:0030425,GO:0032590,GO:0005783,GO:0009897,GO:0030426,GO:0045121,GO:0043209,GO:0032809,GO:0005886,GO:0019899,GO:0034235,GO:0005096,GO:0005178,GO:0019901,GO:0001525,GO:0098609,GO:0007267,GO:0007010,GO:0048041,GO:0007229,GO:0050771,GO:0030336,GO:0070571,GO:0006469,GO:0061099,GO:0050860,GO:0002693,GO:0051894,GO:0043547,GO:0034116,GO:…	anchored component of external side of plasma membrane|anchored component of plasma membrane|apical plasma membrane|axolemma|cell surface|cytosol|dendrite|dendrite membrane|endoplasmic reticulum|external side of plasma membrane|growth cone|membrane raft|myelin sheath|neuronal cell body membrane|plasma membrane|enzyme binding|GPI anchor binding|GTPase activator activity|integrin binding|protein ki…	mmu04670	Leukocyte transendothelial migration					ENOG502S18P	S	GPI anchor binding	Function unknown	PF00047	ig	Immunoglobulin domain
P01899	H2-D1	14964	H-2 class I histocompatibility antigen, D-B alpha chain	GO:0009986,GO:0005783,GO:0070971,GO:0009897,GO:0005615,GO:0005794,GO:0005797,GO:0071556,GO:0042824,GO:0042612,GO:0030670,GO:0005886,GO:0030881,GO:0042610,GO:0042605,GO:0042277,GO:0044877,GO:0005102,GO:0042608,GO:0046977,GO:0062061,GO:0002485,GO:0002476,GO:0006955,GO:0010977,GO:0001916	cell surface|endoplasmic reticulum|endoplasmic reticulum exit site|external side of plasma membrane|extracellular space|Golgi apparatus|Golgi medial cisterna|integral component of lumenal side of endoplasmic reticulum membrane|MHC class I peptide loading complex|MHC class I protein complex|phagocytic vesicle membrane|plasma membrane|beta-2-microglobulin binding|CD8 receptor binding|peptide antige…	mmu04514,mmu04144,mmu04145,mmu04218,mmu04650,mmu04612,mmu05203,mmu05166,mmu05170,mmu05168,mmu05163,mmu05167,mmu05169,mmu05165,mmu05320,mmu05330,mmu05332,mmu05416,mmu04940	Cell adhesion molecules|Endocytosis|Phagosome|Cellular senescence|Natural killer cell mediated cytotoxicity|Antigen processing and presentation|Viral carcinogenesis|Human T-cell leukemia virus 1 infection|Human immunodeficiency virus 1 infection|Herpes simplex virus 1 infection|Human cytomegalovirus infection|Kaposi sarcoma-associated herpesvirus infection|Epstein-Barr virus infection|Human papil…					ENOG502RQEK	S	antigen processing and presentation of peptide antigen via MHC class I	Function unknown	PF00129	MHC_I	Class I Histocompatibility antigen, domains alpha 1 and 2
P01942	Hba	110257	Hemoglobin subunit alpha	GO:0022627,GO:0005615,GO:0031838,GO:0005833,GO:0043209,GO:0020037,GO:0005506,GO:0043177,GO:0019825,GO:0005344,GO:0044877,GO:0098869,GO:0048821,GO:0042744,GO:0001701,GO:0009617,GO:0035634	cytosolic small ribosomal subunit|extracellular space|haptoglobin-hemoglobin complex|hemoglobin complex|myelin sheath|heme binding|iron ion binding|organic acid binding|oxygen binding|oxygen carrier activity|protein-containing complex binding|cellular oxidant detoxification|erythrocyte development|hydrogen peroxide catabolic process|in utero embryonic development|response to bacterium|response to…	mmu05144,mmu05143	Malaria|African trypanosomiasis	KOG3378	[C]	Globins and related hemoproteins	Energy production and conversion	KOG3378	C	oxygen carrier activity	Energy production and conversion	PF00042	Globin	Globin
P02088	Hbb-b1	100503605	Hemoglobin subunit beta-1	GO:0031838,GO:0005833,GO:0043209,GO:0020037,GO:0031721,GO:0046872,GO:0043177,GO:0019825,GO:0005344,GO:0098869,GO:0048821,GO:0030097,GO:0042744,GO:0015671,GO:0010999	haptoglobin-hemoglobin complex|hemoglobin complex|myelin sheath|heme binding|hemoglobin alpha binding|metal ion binding|organic acid binding|oxygen binding|oxygen carrier activity|cellular oxidant detoxification|erythrocyte development|hemopoiesis|hydrogen peroxide catabolic process|oxygen transport|regulation of eIF2 alpha phosphorylation by heme	mmu05144,mmu05143	Malaria|African trypanosomiasis	KOG3378	[C]	Globins and related hemoproteins	Energy production and conversion	KOG3378	C	Belongs to the globin family	Energy production and conversion	PF00042	Globin	Globin
P02301	H3-5	625328	Histone H3.3C	GO:0000786,GO:0005634,GO:0003677,GO:0046982,GO:0006334	nucleosome|nucleus|DNA binding|protein heterodimerization activity|nucleosome assembly	mmu04613,mmu05202,mmu05322,mmu05034	Neutrophil extracellular trap formation|Transcriptional misregulation in cancer|Systemic lupus erythematosus|Alcoholism	KOG1745	[B]	Histones H3 and H4	Chromatin structure and dynamics					PF00125	Histone	Core histone H2A/H2B/H3/H4
P02469	Lamb1	16777	Laminin subunit beta-1	GO:0005604,GO:0062023,GO:0031012,GO:0005576,GO:0005615,GO:0043256,GO:0005606,GO:0043259,GO:0005607,GO:0043257,GO:0005634,GO:0048471,GO:0019899,GO:0005201,GO:0043208,GO:0005178,GO:0009887,GO:0070831,GO:0016477,GO:0007566,GO:0007611,GO:0007162,GO:0031175,GO:0021812,GO:0042476,GO:0030335,GO:0034446,GO:0009888	basement membrane|collagen-containing extracellular matrix|extracellular matrix|extracellular region|extracellular space|laminin complex|laminin-1 complex|laminin-10 complex|laminin-2 complex|laminin-8 complex|nucleus|perinuclear region of cytoplasm|enzyme binding|extracellular matrix structural constituent|glycosphingolipid binding|integrin binding|animal organ morphogenesis|basement membrane as…	mmu04151,mmu04512,mmu04510,mmu05200,mmu05222,mmu05165,mmu05146,mmu05145	PI3K-Akt signaling pathway|ECM-receptor interaction|Focal adhesion|Pathways in cancer|Small cell lung cancer|Human papillomavirus infection|Amoebiasis|Toxoplasmosis	KOG0994	[W]	Extracellular matrix glycoprotein Laminin subunit beta	Extracellular structures	KOG0994	S	metanephric glomerular basement membrane development	Function unknown	PF00053	Laminin_EGF	Laminin EGF domain
P02535	Krt10	16661	Keratin, type I cytoskeletal 10	GO:0009986,GO:0045095,GO:0008092,GO:0046982,GO:0005198,GO:0071277,GO:0008544,GO:0030855,GO:0045109,GO:0003334,GO:0045684,GO:0051290	cell surface|keratin filament|cytoskeletal protein binding|protein heterodimerization activity|structural molecule activity|cellular response to calcium ion|epidermis development|epithelial cell differentiation|intermediate filament organization|keratinocyte development|positive regulation of epidermis development|protein heterotetramerization	mmu04915,mmu05150	Estrogen signaling pathway|Staphylococcus aureus infection					ENOG502QTM6	S	structural molecule activity	Function unknown	PF00038	Filament	Intermediate filament protein
P02798	Mt2	621968	Metallothionein-2	GO:0005737,GO:0005829,GO:0005634,GO:0046872,GO:0008270,GO:0071276,GO:0071280,GO:0071294,GO:0006882,GO:0010273,GO:0045926,GO:0007263,GO:0009617	cytoplasm|cytosol|nucleus|metal ion binding|zinc ion binding|cellular response to cadmium ion|cellular response to copper ion|cellular response to zinc ion|cellular zinc ion homeostasis|detoxification of copper ion|negative regulation of growth|nitric oxide mediated signal transduction|response to bacterium							KOG4738	S	cellular response to zinc ion	Function unknown	PF00131	Metallothio	Metallothionein
P02802	Mt1	17748	Metallothionein-1	GO:0005737,GO:0005829,GO:0005764,GO:0005634,GO:0005507,GO:0046872,GO:0008270,GO:0006875,GO:0071276,GO:0071247,GO:0071280,GO:0071294,GO:0006882,GO:0010273,GO:0045926,GO:0043524,GO:0007263	cytoplasm|cytosol|lysosome|nucleus|copper ion binding|metal ion binding|zinc ion binding|cellular metal ion homeostasis|cellular response to cadmium ion|cellular response to chromate|cellular response to copper ion|cellular response to zinc ion|cellular zinc ion homeostasis|detoxification of copper ion|negative regulation of growth|negative regulation of neuron apoptotic process|nitric oxide medi…	mmu04978	Mineral absorption					KOG4738	S	cellular response to zinc ion	Function unknown	PF00131	Metallothio	Metallothionein
P03930	Mtatp8	17706	ATP synthase protein 8	GO:0016021,GO:0005753,GO:0000276,GO:0005739,GO:0015078,GO:0015986	integral component of membrane|mitochondrial proton-transporting ATP synthase complex|mitochondrial proton-transporting ATP synthase complex, coupling factor F(o)|mitochondrion|proton transmembrane transporter activity|ATP synthesis coupled proton transport	mmu00190,mmu04714,mmu05208,mmu05010,mmu05012,mmu05014,mmu05016,mmu05020,mmu05022,mmu05415	Oxidative phosphorylation|Thermogenesis|Chemical carcinogenesis - reactive oxygen species|Alzheimer disease|Parkinson disease|Amyotrophic lateral sclerosis|Huntington disease|Prion disease|Pathways of neurodegeneration - multiple diseases|Diabetic cardiomyopathy					ENOG502T21P	A	ATP synthesis coupled proton transport	RNA processing and modification	PF00895	ATP-synt_8	ATP synthase protein 8
P04104	Krt1	16678	Keratin, type II cytoskeletal 1	GO:0062023,GO:0001533,GO:0045095,GO:0016020,GO:0030246,GO:0046982,GO:0030280,GO:0001867,GO:0061436,GO:0050728,GO:0018149,GO:0051290	collagen-containing extracellular matrix|cornified envelope|keratin filament|membrane|carbohydrate binding|protein heterodimerization activity|structural constituent of skin epidermis|complement activation, lectin pathway|establishment of skin barrier|negative regulation of inflammatory response|peptide cross-linking|protein heterotetramerization							ENOG502QQIF	S	structural molecule activity	Function unknown	PF00038	Filament	Intermediate filament protein
P05064	Aldoa	11674	Fructose-bisphosphate aldolase A	GO:0015629,GO:0005737,GO:0005829,GO:0070062,GO:0005615,GO:0000792,GO:0031430,GO:0016020,GO:0005739,GO:0043209,GO:0005886,GO:0032991,GO:0035686,GO:0061827,GO:0030018,GO:0008092,GO:0070061,GO:0004332,GO:0042802,GO:0002020,GO:0006754,GO:0007339,GO:0030388,GO:0006000,GO:0006096,GO:0061615,GO:0019242,GO:0046716,GO:0030335,GO:0051289,GO:0008360,GO:0006941	actin cytoskeleton|cytoplasm|cytosol|extracellular exosome|extracellular space|heterochromatin|M band|membrane|mitochondrion|myelin sheath|plasma membrane|protein-containing complex|sperm fibrous sheath|sperm head|Z disc|cytoskeletal protein binding|fructose binding|fructose-bisphosphate aldolase activity|identical protein binding|protease binding|ATP biosynthetic process|binding of sperm to zona…	mmu00010,mmu00030,mmu00051,mmu04066	Glycolysis / Gluconeogenesis|Pentose phosphate pathway|Fructose and mannose metabolism|HIF-1 signaling pathway	KOG1557	[G]	Fructose-biphosphate aldolase	Carbohydrate transport and metabolism	KOG1557	G	fructose-bisphosphate aldolase activity	Carbohydrate transport and metabolism	PF00274	Glycolytic	Fructose-bisphosphate aldolase class-I
P05132	Prkaca	18747	cAMP-dependent protein kinase catalytic subunit alpha	GO:0001669,GO:0005930,GO:0005952,GO:0005813,GO:0097546,GO:0005737,GO:0005829,GO:0043197,GO:0005794,GO:0016020,GO:0005739,GO:0031594,GO:0043005,GO:0016607,GO:0005654,GO:0031588,GO:0005634,GO:0048471,GO:0005886,GO:0044853,GO:0098793,GO:0032991,GO:0036126,GO:0097225,GO:0004679,GO:0005524,GO:0004691,GO:0000287,GO:0030145,GO:0019904,GO:0034237,GO:0004672,GO:0019901,GO:0106310,GO:0004674,GO:0004712,GO:…	acrosomal vesicle|axoneme|cAMP-dependent protein kinase complex|centrosome|ciliary base|cytoplasm|cytosol|dendritic spine|Golgi apparatus|membrane|mitochondrion|neuromuscular junction|neuron projection|nuclear speck|nucleoplasm|nucleotide-activated protein kinase complex|nucleus|perinuclear region of cytoplasm|plasma membrane|plasma membrane raft|presynapse|protein-containing complex|sperm flagel…	mmu04010,mmu04014,mmu04310,mmu04340,mmu04371,mmu04020,mmu04024,mmu04140,mmu04114,mmu04530,mmu04540,mmu04611,mmu04062,mmu04911,mmu04910,mmu04922,mmu04923,mmu04912,mmu04913,mmu04915,mmu04914,mmu04921,mmu04926,mmu04935,mmu04918,mmu04919,mmu04928,mmu04916,mmu04924,mmu04925,mmu04927,mmu04261,mmu04270,mmu04970,mmu04971,mmu04976,mmu04962,mmu04961,mmu04724,mmu04727,mmu04725,mmu04728,mmu04726,mmu04720,mmu…	MAPK signaling pathway|Ras signaling pathway|Wnt signaling pathway|Hedgehog signaling pathway|Apelin signaling pathway|Calcium signaling pathway|cAMP signaling pathway|Autophagy - animal|Oocyte meiosis|Tight junction|Gap junction|Platelet activation|Chemokine signaling pathway|Insulin secretion|Insulin signaling pathway|Glucagon signaling pathway|Regulation of lipolysis in adipocytes|GnRH signali…	KOG0616	[T]	cAMP-dependent protein kinase catalytic subunit (PKA)	Signal transduction mechanisms	KOG0616	F	CAMP-dependent protein kinase catalytic subunit	Nucleotide transport and metabolism	PF00069	Pkinase	Protein kinase domain
P05201	Got1	14718	Aspartate aminotransferase, cytoplasmic	GO:0043679,GO:0005737,GO:0005829,GO:0005764,GO:0005654,GO:0031406,GO:0004069,GO:0047801,GO:0004609,GO:0030170,GO:0006103,GO:0006532,GO:0006533,GO:0006531,GO:0032869,GO:0071260,GO:0043648,GO:0055089,GO:0019551,GO:0019550,GO:0006536,GO:0006114,GO:0032966,GO:0051481,GO:0051902,GO:0007219,GO:0006107,GO:0030511,GO:0046686,GO:0009743,GO:0051384,GO:0035902,GO:1990267,GO:0060290	axon terminus|cytoplasm|cytosol|lysosome|nucleoplasm|carboxylic acid binding|L-aspartate:2-oxoglutarate aminotransferase activity|L-cysteine:2-oxoglutarate aminotransferase activity|phosphatidylserine decarboxylase activity|pyridoxal phosphate binding|2-oxoglutarate metabolic process|aspartate biosynthetic process|aspartate catabolic process|aspartate metabolic process|cellular response to insuli…	mmu00250,mmu00270,mmu00220,mmu00330,mmu00350,mmu00360,mmu00400	Alanine, aspartate and glutamate metabolism|Cysteine and methionine metabolism|Arginine biosynthesis|Arginine and proline metabolism|Tyrosine metabolism|Phenylalanine metabolism|Phenylalanine, tyrosine and tryptophan biosynthesis	KOG1412	[E]	Aspartate aminotransferase/Glutamic oxaloacetic transaminase AAT2/GOT1	Amino acid transport and metabolism	KOG1412	E	aspartate biosynthetic process	Amino acid transport and metabolism	PF00155	Aminotran_1_2	Aminotransferase class I and II
P05202	Got2	14719	Aspartate aminotransferase, mitochondrial	GO:0009986,GO:0005743,GO:0005759,GO:0005739,GO:0043209,GO:0043204,GO:0005886,GO:0032991,GO:0042383,GO:0030315,GO:0016597,GO:0031406,GO:0019899,GO:0042802,GO:0016212,GO:0004069,GO:0005543,GO:0030170,GO:0006103,GO:0006532,GO:0006533,GO:0006531,GO:0006520,GO:0043648,GO:0015908,GO:0007565,GO:0019551,GO:0019550,GO:0006536,GO:0007595,GO:0006107,GO:0045471,GO:0032868,GO:0043278,GO:0014850	cell surface|mitochondrial inner membrane|mitochondrial matrix|mitochondrion|myelin sheath|perikaryon|plasma membrane|protein-containing complex|sarcolemma|T-tubule|amino acid binding|carboxylic acid binding|enzyme binding|identical protein binding|kynurenine-oxoglutarate transaminase activity|L-aspartate:2-oxoglutarate aminotransferase activity|phospholipid binding|pyridoxal phosphate binding|2-…	mmu00250,mmu00270,mmu00220,mmu00330,mmu00350,mmu00360,mmu00400,mmu04975	Alanine, aspartate and glutamate metabolism|Cysteine and methionine metabolism|Arginine biosynthesis|Arginine and proline metabolism|Tyrosine metabolism|Phenylalanine metabolism|Phenylalanine, tyrosine and tryptophan biosynthesis|Fat digestion and absorption	KOG1411	[E]	Aspartate aminotransferase/Glutamic oxaloacetic transaminase AAT1/GOT2	Amino acid transport and metabolism	KOG1411	E	Aspartate aminotransferase	Amino acid transport and metabolism	PF00155	Aminotran_1_2	Aminotransferase class I and II
P05213	Tuba1b	22143	Tubulin alpha-1B chain	GO:0005737,GO:0005881,GO:0005829,GO:0045121,GO:0005874,GO:0015630,GO:0043209,GO:0003725,GO:0005525,GO:0005200,GO:0031625,GO:0071353,GO:0000226,GO:0000278	cytoplasm|cytoplasmic microtubule|cytosol|membrane raft|microtubule|microtubule cytoskeleton|myelin sheath|double-stranded RNA binding|GTP binding|structural constituent of cytoskeleton|ubiquitin protein ligase binding|cellular response to interleukin-4|microtubule cytoskeleton organization|mitotic cell cycle	mmu04145,mmu04210,mmu04530,mmu04540,mmu05132,mmu05010,mmu05012,mmu05014,mmu05016,mmu05020,mmu05022	Phagosome|Apoptosis|Tight junction|Gap junction|Salmonella infection|Alzheimer disease|Parkinson disease|Amyotrophic lateral sclerosis|Huntington disease|Prion disease|Pathways of neurodegeneration - multiple diseases	KOG1376	[Z]	Alpha tubulin	Cytoskeleton	KOG1376	Z	structural constituent of cytoskeleton	Cytoskeleton	PF00091	Tubulin	Tubulin/FtsZ family, GTPase domain
P05533	Ly6a	110454	Lymphocyte antigen 6A-2/6E-1	GO:0031225,GO:0009897,GO:0005886,GO:0045202,GO:0033130,GO:0030550,GO:0095500,GO:0009617	anchored component of membrane|external side of plasma membrane|plasma membrane|synapse|acetylcholine receptor binding|acetylcholine receptor inhibitor activity|acetylcholine receptor signaling pathway|response to bacterium							ENOG502TD4F	M	Ly-6 antigen / uPA receptor -like domain	Cell wall/membrane/envelope biogenesis	PF00021	UPAR_LY6	u-PAR/Ly-6 domain
P05622	Pdgfrb	18596	Platelet-derived growth factor receptor beta	GO:0016324,GO:0009986,GO:0005737,GO:0031410,GO:0005794,GO:0005887,GO:0043231,GO:0031226,GO:0043202,GO:0016020,GO:0005634,GO:0005886,GO:0043235,GO:0001726,GO:0005524,GO:0019899,GO:0019838,GO:0016301,GO:0043548,GO:0005019,GO:0048407,GO:0005161,GO:0005017,GO:0019901,GO:0004713,GO:0005102,GO:0004714,GO:0038085,GO:0030325,GO:0035909,GO:0001568,GO:0055003,GO:0060947,GO:0060326,GO:0016477,GO:0060981,GO:…	apical plasma membrane|cell surface|cytoplasm|cytoplasmic vesicle|Golgi apparatus|integral component of plasma membrane|intracellular membrane-bounded organelle|intrinsic component of plasma membrane|lysosomal lumen|membrane|nucleus|plasma membrane|receptor complex|ruffle|ATP binding|enzyme binding|growth factor binding|kinase activity|phosphatidylinositol 3-kinase binding|platelet-derived growth…	mmu04010,mmu04014,mmu04015,mmu04630,mmu04020,mmu04072,mmu04151,mmu04510,mmu04540,mmu04810,mmu05200,mmu05206,mmu05230,mmu05231,mmu05214,mmu05218,mmu05215,mmu05165,mmu01521	MAPK signaling pathway|Ras signaling pathway|Rap1 signaling pathway|JAK-STAT signaling pathway|Calcium signaling pathway|Phospholipase D signaling pathway|PI3K-Akt signaling pathway|Focal adhesion|Gap junction|Regulation of actin cytoskeleton|Pathways in cancer|MicroRNAs in cancer|Central carbon metabolism in cancer|Choline metabolism in cancer|Glioma|Melanoma|Prostate cancer|Human papillomavirus…	KOG0200	[T]	Fibroblast/platelet-derived growth factor receptor and related receptor tyrosine kinases	Signal transduction mechanisms	KOG0200	T	transmembrane receptor protein tyrosine kinase activity	Signal transduction mechanisms	PF00047	ig	Immunoglobulin domain
P06151	Ldha	16828	L-lactate dehydrogenase A chain	GO:0005829,GO:0005739,GO:0035686,GO:0042802,GO:0004459,GO:0004457,GO:0031668,GO:0019661,GO:0019244	cytosol|mitochondrion|sperm fibrous sheath|identical protein binding|L-lactate dehydrogenase activity|lactate dehydrogenase activity|cellular response to extracellular stimulus|glucose catabolic process to lactate via pyruvate|lactate biosynthetic process from pyruvate	mmu00010,mmu00620,mmu00640,mmu00270,mmu04066,mmu04922,mmu05230	Glycolysis / Gluconeogenesis|Pyruvate metabolism|Propanoate metabolism|Cysteine and methionine metabolism|HIF-1 signaling pathway|Glucagon signaling pathway|Central carbon metabolism in cancer	KOG1495	[C]	Lactate dehydrogenase	Energy production and conversion	KOG1495	C	belongs to the LDH MDH superfamily	Energy production and conversion	PF00056	Ldh_1_N	lactate/malate dehydrogenase, NAD binding domain
P06745	Gpi	14751	Glucose-6-phosphate isomerase	GO:0060170,GO:0005737,GO:0005829,GO:0005615,GO:0043209,GO:0043005,GO:0005654,GO:0005886,GO:0005125,GO:0004347,GO:0008083,GO:0048029,GO:0031625,GO:0061621,GO:0005975,GO:0034101,GO:0006094,GO:0051156,GO:0042593,GO:0006096,GO:0061620,GO:0001701,GO:0007611,GO:0001707,GO:0043154,GO:0043524,GO:0010595,GO:0002639,GO:0046686,GO:0032355,GO:0035902,GO:0043278,GO:0035994,GO:0032570,GO:0033574	ciliary membrane|cytoplasm|cytosol|extracellular space|myelin sheath|neuron projection|nucleoplasm|plasma membrane|cytokine activity|glucose-6-phosphate isomerase activity|growth factor activity|monosaccharide binding|ubiquitin protein ligase binding|canonical glycolysis|carbohydrate metabolic process|erythrocyte homeostasis|gluconeogenesis|glucose 6-phosphate metabolic process|glucose homeostasi…	mmu00010,mmu00030,mmu00500,mmu00520	Glycolysis / Gluconeogenesis|Pentose phosphate pathway|Starch and sucrose metabolism|Amino sugar and nucleotide sugar metabolism	KOG2446	[G]	Glucose-6-phosphate isomerase	Carbohydrate transport and metabolism	KOG2446	G	glucose-6-phosphate isomerase activity	Carbohydrate transport and metabolism	PF00342	PGI	Phosphoglucose isomerase
P06797	Ctsl	13039	Procathepsin L	GO:0016324,GO:0042583,GO:0062023,GO:0005737,GO:0031410,GO:0009897,GO:0005615,GO:0005764,GO:0005902,GO:0043005,GO:0005730,GO:0005634,GO:0043204,GO:0005773,GO:0004177,GO:0016807,GO:0004197,GO:0004175,GO:0042393,GO:0030984,GO:0042277,GO:0044877,GO:0048002,GO:0048102,GO:0043373,GO:0007154,GO:0009267,GO:0030574,GO:0046697,GO:0060309,GO:0034230,GO:0031069,GO:0006955,GO:0008584,GO:0010259,GO:0010839,GO:…	apical plasma membrane|chromaffin granule|collagen-containing extracellular matrix|cytoplasm|cytoplasmic vesicle|external side of plasma membrane|extracellular space|lysosome|microvillus|neuron projection|nucleolus|nucleus|perikaryon|vacuole|aminopeptidase activity|cysteine-type carboxypeptidase activity|cysteine-type endopeptidase activity|endopeptidase activity|histone binding|kininogen binding…	mmu04145,mmu04142,mmu04140,mmu04210,mmu04612,mmu05205,mmu05323,mmu05418	Phagosome|Lysosome|Autophagy - animal|Apoptosis|Antigen processing and presentation|Proteoglycans in cancer|Rheumatoid arthritis|Fluid shear stress and atherosclerosis	KOG1543	[O]	Cysteine proteinase Cathepsin L	Posttranslational modification, protein turnover, chaperones	KOG1543	O	cysteine-type peptidase activity	Posttranslational modification, protein turnover, chaperones	PF00112	Peptidase_C1	Papain family cysteine protease
P06801	Me1	17436	NADP-dependent malic enzyme	GO:0005829,GO:0005739,GO:0042802,GO:0004471,GO:0004473,GO:0004470,GO:0030145,GO:0051287,GO:0050661,GO:0008948,GO:0006108,GO:0006090,GO:1902031,GO:0009725	cytosol|mitochondrion|identical protein binding|malate dehydrogenase (decarboxylating) (NAD+) activity|malate dehydrogenase (decarboxylating) (NADP+) activity|malic enzyme activity|manganese ion binding|NAD binding|NADP binding|oxaloacetate decarboxylase activity|malate metabolic process|pyruvate metabolic process|regulation of NADP metabolic process|response to hormone	mmu00620,mmu03320	Pyruvate metabolism|PPAR signaling pathway	KOG1257	[C]	NADP+-dependent malic enzyme	Energy production and conversion	KOG1257	C	malate dehydrogenase (decarboxylating) (NAD+) activity	Energy production and conversion	PF00390	malic	Malic enzyme, N-terminal domain
P07091	S100a4	20198	Protein S100-A4	GO:0005576,GO:0043005,GO:0005634,GO:0048471,GO:0003779,GO:0005509,GO:0048306,GO:0042802,GO:0050786,GO:0046914,GO:0043123	extracellular region|neuron projection|nucleus|perinuclear region of cytoplasm|actin binding|calcium ion binding|calcium-dependent protein binding|identical protein binding|RAGE receptor binding|transition metal ion binding|positive regulation of I-kappaB kinase/NF-kappaB signaling							ENOG502S4AU	S	RAGE receptor binding	Function unknown	PF01023	S_100	S-100/ICaBP type calcium binding domain
P07214	Sparc	20692	SPARC	GO:0005604,GO:0009986,GO:0062023,GO:0005737,GO:0031012,GO:0005615,GO:0098978,GO:0043231,GO:0016363,GO:0005634,GO:0031091,GO:0031092,GO:0045202,GO:0031982,GO:0005509,GO:0005518,GO:0050840,GO:0048856,GO:0060348,GO:0071363,GO:0030324,GO:0016525,GO:0001937,GO:0043473,GO:0010595,GO:0022604,GO:0042127,GO:0050807	basement membrane|cell surface|collagen-containing extracellular matrix|cytoplasm|extracellular matrix|extracellular space|glutamatergic synapse|intracellular membrane-bounded organelle|nuclear matrix|nucleus|platelet alpha granule|platelet alpha granule membrane|synapse|vesicle|calcium ion binding|collagen binding|extracellular matrix binding|anatomical structure development|bone development|cel…			KOG4004	[W]	Matricellular protein Osteonectin/SPARC/BM-40	Extracellular structures	KOG4004	T	collagen binding	Signal transduction mechanisms	PF00050	Kazal_1	Kazal-type serine protease inhibitor domain
P07356	Anxa2	12306	Annexin A2	GO:1990665,GO:0005604,GO:0016323,GO:0005938,GO:0009986,GO:0062023,GO:0005737,GO:0005829,GO:0005769,GO:0005768,GO:0070062,GO:0005615,GO:0019897,GO:0031902,GO:0005811,GO:0005765,GO:0044354,GO:0042470,GO:0016020,GO:0045121,GO:0030496,GO:0035749,GO:0005634,GO:1990667,GO:0048471,GO:0005886,GO:0032991,GO:0001726,GO:0042383,GO:0043220,GO:0031982,GO:0044730,GO:0005262,GO:0005509,GO:0005544,GO:0048306,GO:…	AnxA2-p11 complex|basement membrane|basolateral plasma membrane|cell cortex|cell surface|collagen-containing extracellular matrix|cytoplasm|cytosol|early endosome|endosome|extracellular exosome|extracellular space|extrinsic component of plasma membrane|late endosome membrane|lipid droplet|lysosomal membrane|macropinosome|melanosome|membrane|membrane raft|midbody|myelin sheath adaxonal region|nucl…	mmu05132	Salmonella infection	KOG0819	[U]	Annexin	Intracellular trafficking, secretion, and vesicular transport	KOG0819	S	calcium-dependent phospholipid binding	Function unknown	PF00191	Annexin	Annexin
P07724	Alb	11657	Albumin	GO:0005604,GO:0005737,GO:0005783,GO:0070062,GO:0005576,GO:0005615,GO:0005794,GO:0043209,GO:0032991,GO:0051087,GO:0003677,GO:1903981,GO:0019899,GO:0140272,GO:0005504,GO:0042802,GO:0072341,GO:0019825,GO:0030170,GO:0015643,GO:0008270,GO:0009267,GO:0051659,GO:0043066,GO:0046010	basement membrane|cytoplasm|endoplasmic reticulum|extracellular exosome|extracellular region|extracellular space|Golgi apparatus|myelin sheath|protein-containing complex|chaperone binding|DNA binding|enterobactin binding|enzyme binding|exogenous protein binding|fatty acid binding|identical protein binding|modified amino acid binding|oxygen binding|pyridoxal phosphate binding|toxic substance bindi…	mmu04918	Thyroid hormone synthesis					ENOG502R7EA	O	cytolysis by symbiont of host cells	Posttranslational modification, protein turnover, chaperones	PF00273	Serum_albumin	Serum albumin family
P07742	Rrm1	20133	Ribonucleoside-diphosphate reductase large subunit	GO:0042995,GO:0005737,GO:0005829,GO:0043025,GO:0005635,GO:0005971,GO:0005524,GO:0097718,GO:0042802,GO:0017076,GO:0061731,GO:0004748,GO:0021846,GO:0009263,GO:0006260,GO:0008584,GO:0000278,GO:0051290,GO:0006206,GO:0010212,GO:0060041	cell projection|cytoplasm|cytosol|neuronal cell body|nuclear envelope|ribonucleoside-diphosphate reductase complex|ATP binding|disordered domain specific binding|identical protein binding|purine nucleotide binding|ribonucleoside-diphosphate reductase activity|ribonucleoside-diphosphate reductase activity, thioredoxin disulfide as acceptor|cell proliferation in forebrain|deoxyribonucleotide biosyn…	mmu00230,mmu00240,mmu00480,mmu00983	Purine metabolism|Pyrimidine metabolism|Glutathione metabolism|Drug metabolism - other enzymes	KOG1112	[F]	Ribonucleotide reductase, alpha subunit	Nucleotide transport and metabolism	KOG1112	F	ribonucleoside-diphosphate reductase activity	Nucleotide transport and metabolism	PF00317	Ribonuc_red_lgN	Ribonucleotide reductase, all-alpha domain
P07901	Hsp90aa1	15519	Heat shock protein HSP 90-alpha	GO:0016324,GO:0044295,GO:0016323,GO:0031526,GO:0009986,GO:0062023,GO:0005737,GO:0005829,GO:0044294,GO:0042470,GO:0005739,GO:0043209,GO:0043005,GO:0043025,GO:0005634,GO:0048471,GO:0005886,GO:0032991,GO:0036126,GO:0097226,GO:0097524,GO:0005524,GO:0140603,GO:0002135,GO:0032564,GO:0097718,GO:0070182,GO:0005525,GO:0051020,GO:0042826,GO:0042802,GO:0003729,GO:0030235,GO:0044183,GO:0042803,GO:0019903,GO:…	apical plasma membrane|axonal growth cone|basolateral plasma membrane|brush border membrane|cell surface|collagen-containing extracellular matrix|cytoplasm|cytosol|dendritic growth cone|melanosome|mitochondrion|myelin sheath|neuron projection|neuronal cell body|nucleus|perinuclear region of cytoplasm|plasma membrane|protein-containing complex|sperm flagellum|sperm mitochondrial sheath|sperm plasm…	mmu04141,mmu04151,mmu04217,mmu04621,mmu04612,mmu04659,mmu04657,mmu04915,mmu04914,mmu05200,mmu05207,mmu05215,mmu05132,mmu05417,mmu05418	Protein processing in endoplasmic reticulum|PI3K-Akt signaling pathway|Necroptosis|NOD-like receptor signaling pathway|Antigen processing and presentation|Th17 cell differentiation|IL-17 signaling pathway|Estrogen signaling pathway|Progesterone-mediated oocyte maturation|Pathways in cancer|Chemical carcinogenesis - receptor activation|Prostate cancer|Salmonella infection|Lipid and atherosclerosis…	KOG0019	[O]	Molecular chaperone (HSP90 family)	Posttranslational modification, protein turnover, chaperones	KOG0019	O	unfolded protein binding	Posttranslational modification, protein turnover, chaperones	PF00183	HSP90	Hsp90 protein
P08003	Pdia4	12304	Protein disulfide-isomerase A4	GO:0009986,GO:0005783,GO:0034663,GO:0005788,GO:0005615,GO:0042470,GO:0005790,GO:0003756,GO:0015035,GO:0061077,GO:1903334,GO:0006457,GO:0034976	cell surface|endoplasmic reticulum|endoplasmic reticulum chaperone complex|endoplasmic reticulum lumen|extracellular space|melanosome|smooth endoplasmic reticulum|protein disulfide isomerase activity|protein-disulfide reductase activity|chaperone-mediated protein folding|positive regulation of protein folding|protein folding|response to endoplasmic reticulum stress	mmu04141,mmu04918	Protein processing in endoplasmic reticulum|Thyroid hormone synthesis	KOG0190	[O]	Protein disulfide isomerase (prolyl 4-hydroxylase beta subunit)	Posttranslational modification, protein turnover, chaperones	KOG0190	C	intramolecular oxidoreductase activity, transposing S-S bonds	Energy production and conversion	PF00085	Thioredoxin	Thioredoxin
P08030	Aprt	11821	Adenine phosphoribosyltransferase	GO:0005737,GO:0005829,GO:0005654,GO:0002055,GO:0003999,GO:0016208,GO:0046083,GO:0006168,GO:0044209,GO:0032869,GO:0007625,GO:0007595,GO:0006166	cytoplasm|cytosol|nucleoplasm|adenine binding|adenine phosphoribosyltransferase activity|AMP binding|adenine metabolic process|adenine salvage|AMP salvage|cellular response to insulin stimulus|grooming behavior|lactation|purine ribonucleoside salvage	mmu00230	Purine metabolism	KOG1712	[F]	Adenine phosphoribosyl transferases	Nucleotide transport and metabolism	KOG1712	F	adenine phosphoribosyltransferase activity	Nucleotide transport and metabolism	PF00156	Pribosyltran	Phosphoribosyl transferase domain
P08071	Ltf	17002	Lactotransferrin	GO:0009986,GO:0005737,GO:0005769,GO:0005615,GO:0005886,GO:0032991,GO:0055037,GO:0030141,GO:0042581,GO:0004869,GO:0008201,GO:0005506,GO:0001530,GO:0008233,GO:0043539,GO:0004252,GO:0019731,GO:0019732,GO:0061844,GO:0060349,GO:0050829,GO:0050830,GO:0045087,GO:0002227,GO:0055072,GO:0006826,GO:0031640,GO:0051673,GO:0044793,GO:0043066,GO:0032780,GO:2000117,GO:0031665,GO:0045837,GO:2001205,GO:1900229,GO:…	cell surface|cytoplasm|early endosome|extracellular space|plasma membrane|protein-containing complex|recycling endosome|secretory granule|specific granule|cysteine-type endopeptidase inhibitor activity|heparin binding|iron ion binding|lipopolysaccharide binding|peptidase activity|protein serine/threonine kinase activator activity|serine-type endopeptidase activity|antibacterial humoral response|a…							ENOG502QSZB	P	negative regulation of tumor necrosis factor (ligand) superfamily member 11 production	Inorganic ion transport and metabolism	PF00405	Transferrin	Transferrin
P08113	Hsp90b1	22027	Endoplasmin	GO:0005829,GO:0005783,GO:0034663,GO:0005788,GO:0005789,GO:0005576,GO:0042470,GO:0030496,GO:0048471,GO:0005886,GO:0032991,GO:0033018,GO:0005790,GO:0005524,GO:0050750,GO:0019903,GO:0003723,GO:0051082,GO:0031247,GO:0071318,GO:0043066,GO:0006457,GO:0043666,GO:0001666,GO:0030970,GO:0030433	cytosol|endoplasmic reticulum|endoplasmic reticulum chaperone complex|endoplasmic reticulum lumen|endoplasmic reticulum membrane|extracellular region|melanosome|midbody|perinuclear region of cytoplasm|plasma membrane|protein-containing complex|sarcoplasmic reticulum lumen|smooth endoplasmic reticulum|ATP binding|low-density lipoprotein particle receptor binding|protein phosphatase binding|RNA bin…	mmu04141,mmu04151,mmu04657,mmu04915,mmu04918,mmu05200,mmu05207,mmu05215,mmu05132,mmu05417,mmu05418	Protein processing in endoplasmic reticulum|PI3K-Akt signaling pathway|IL-17 signaling pathway|Estrogen signaling pathway|Thyroid hormone synthesis|Pathways in cancer|Chemical carcinogenesis - receptor activation|Prostate cancer|Salmonella infection|Lipid and atherosclerosis|Fluid shear stress and atherosclerosis	KOG0020	[O]	Endoplasmic reticulum glucose-regulated protein (GRP94/endoplasmin), HSP90 family	Posttranslational modification, protein turnover, chaperones	KOG0020	O	unfolded protein binding	Posttranslational modification, protein turnover, chaperones	PF00183	HSP90	Hsp90 protein
P08207	S100a10	20194	Protein S100-A10	GO:1990665,GO:0062023,GO:0005737,GO:0005783,GO:0005615,GO:0019897,GO:0045121,GO:0005509,GO:0048306,GO:0042803,GO:0044325,GO:0001765,GO:0051099,GO:0051894,GO:0043547,GO:0051496,GO:1900026,GO:0072659,GO:0042493,GO:0006900	AnxA2-p11 complex|collagen-containing extracellular matrix|cytoplasm|endoplasmic reticulum|extracellular space|extrinsic component of plasma membrane|membrane raft|calcium ion binding|calcium-dependent protein binding|protein homodimerization activity|transmembrane transporter binding|membrane raft assembly|positive regulation of binding|positive regulation of focal adhesion assembly|positive reg…	mmu05132	Salmonella infection					ENOG502S6TB	S	membrane raft assembly	Function unknown	PF01023	S_100	S-100/ICaBP type calcium binding domain
P08226	Apoe	11816	Apolipoprotein E	GO:0009986,GO:0042627,GO:0005737,GO:0005829,GO:0030425,GO:0034365,GO:0005783,GO:0005768,GO:0031012,GO:0005576,GO:0005615,GO:0031232,GO:0098978,GO:0005794,GO:0034364,GO:0034363,GO:0005770,GO:1990777,GO:0034362,GO:0005764,GO:0043025,GO:0005635,GO:0005886,GO:0045202,GO:0043083,GO:0034361,GO:0001540,GO:0016209,GO:0120020,GO:0043395,GO:0008201,GO:0046848,GO:0042802,GO:0008289,GO:0005319,GO:0071813,GO:…	cell surface|chylomicron|cytoplasm|cytosol|dendrite|discoidal high-density lipoprotein particle|endoplasmic reticulum|endosome|extracellular matrix|extracellular region|extracellular space|extrinsic component of external side of plasma membrane|glutamatergic synapse|Golgi apparatus|high-density lipoprotein particle|intermediate-density lipoprotein particle|late endosome|lipoprotein particle|low-d…	mmu04979,mmu05010	Cholesterol metabolism|Alzheimer disease					ENOG502QVD6	O	very-low-density lipoprotein particle receptor binding	Posttranslational modification, protein turnover, chaperones	PF01442	Apolipoprotein	Apolipoprotein A1/A4/E domain
P08228	Sod1	20655	Superoxide dismutase [Cu-Zn]	GO:1904115,GO:0005737,GO:0031410,GO:0005829,GO:0032839,GO:0031045,GO:0005576,GO:0005615,GO:0005764,GO:0005758,GO:0005739,GO:0043209,GO:0043005,GO:0043025,GO:0005654,GO:0005634,GO:0005777,GO:0005886,GO:0032991,GO:0030141,GO:0051087,GO:0005507,GO:0019899,GO:0042802,GO:0030346,GO:0031267,GO:0004784,GO:0008270,GO:0007568,GO:0008089,GO:0060088,GO:0007569,GO:0006879,GO:0071318,GO:0071276,GO:0035865,GO:…	axon cytoplasm|cytoplasm|cytoplasmic vesicle|cytosol|dendrite cytoplasm|dense core granule|extracellular region|extracellular space|lysosome|mitochondrial intermembrane space|mitochondrion|myelin sheath|neuron projection|neuronal cell body|nucleoplasm|nucleus|peroxisome|plasma membrane|protein-containing complex|secretory granule|chaperone binding|copper ion binding|enzyme binding|identical prote…	mmu04146,mmu04213,mmu05208,mmu05012,mmu05014,mmu05016,mmu05020,mmu05022	Peroxisome|Longevity regulating pathway - multiple species|Chemical carcinogenesis - reactive oxygen species|Parkinson disease|Amyotrophic lateral sclerosis|Huntington disease|Prion disease|Pathways of neurodegeneration - multiple diseases	KOG0441	[P]	Cu2+/Zn2+ superoxide dismutase SOD1	Inorganic ion transport and metabolism	KOG0441	P	oxidoreductase activity, acting on superoxide radicals as acceptor	Inorganic ion transport and metabolism	PF00080	Sod_Cu	Copper/zinc superoxide dismutase (SODC)
P08249	Mdh2	17448	Malate dehydrogenase, mitochondrial	GO:0005737,GO:0016020,GO:0005743,GO:0005759,GO:0005739,GO:0043209,GO:0030060,GO:0046554,GO:0016615,GO:0042803,GO:0043621,GO:0009060,GO:0005975,GO:0006108,GO:0006734,GO:0006107,GO:0006099	cytoplasm|membrane|mitochondrial inner membrane|mitochondrial matrix|mitochondrion|myelin sheath|L-malate dehydrogenase activity|malate dehydrogenase (NADP+) activity|malate dehydrogenase activity|protein homodimerization activity|protein self-association|aerobic respiration|carbohydrate metabolic process|malate metabolic process|NADH metabolic process|oxaloacetate metabolic process|tricarboxylic…	mmu00020,mmu00620,mmu00630,mmu00270	Citrate cycle (TCA cycle)|Pyruvate metabolism|Glyoxylate and dicarboxylate metabolism|Cysteine and methionine metabolism	KOG1494	[C]	NAD-dependent malate dehydrogenase	Energy production and conversion	KOG1494	C	L-malate dehydrogenase activity	Energy production and conversion	PF00056	Ldh_1_N	lactate/malate dehydrogenase, NAD binding domain
P08556	Nras	18176	GTPase NRas	GO:0005794,GO:0000139,GO:0016020,GO:0005886,GO:0003925,GO:0019003,GO:0005525,GO:0003924,GO:0044877,GO:0042832,GO:0048642,GO:0045766,GO:0001938,GO:0048146,GO:0032729,GO:0007265,GO:0051726,GO:0010468,GO:0001932,GO:0050852,GO:0042088	Golgi apparatus|Golgi membrane|membrane|plasma membrane|G protein activity|GDP binding|GTP binding|GTPase activity|protein-containing complex binding|defense response to protozoan|negative regulation of skeletal muscle tissue development|positive regulation of angiogenesis|positive regulation of endothelial cell proliferation|positive regulation of fibroblast proliferation|positive regulation of …	mmu04010,mmu04012,mmu04014,mmu04015,mmu04370,mmu04371,mmu04068,mmu04072,mmu04071,mmu04151,mmu04150,mmu04140,mmu04137,mmu04210,mmu04218,mmu04540,mmu04550,mmu04810,mmu04625,mmu04650,mmu04660,mmu04662,mmu04664,mmu04062,mmu04910,mmu04929,mmu04912,mmu04915,mmu04917,mmu04921,mmu04926,mmu04935,mmu04919,mmu04916,mmu04725,mmu04726,mmu04720,mmu04730,mmu04722,mmu04360,mmu04211,mmu04213,mmu04714,mmu05200,mmu…	MAPK signaling pathway|ErbB signaling pathway|Ras signaling pathway|Rap1 signaling pathway|VEGF signaling pathway|Apelin signaling pathway|FoxO signaling pathway|Phospholipase D signaling pathway|Sphingolipid signaling pathway|PI3K-Akt signaling pathway|mTOR signaling pathway|Autophagy - animal|Mitophagy - animal|Apoptosis|Cellular senescence|Gap junction|Signaling pathways regulating pluripotenc…	KOG0395	[R]	Ras-related GTPase	General function prediction only	KOG0395	G	GTPase activity	Carbohydrate transport and metabolism	PF00071	Ras	Ras family
P08752	Gnai2	14678	Guanine nucleotide-binding protein G(i) subunit alpha-2	GO:0044297,GO:0005813,GO:0005737,GO:0005829,GO:0030425,GO:0005834,GO:0016020,GO:0045121,GO:0030496,GO:0005654,GO:0005634,GO:0005886,GO:0045202,GO:0001664,GO:0031683,GO:0005525,GO:0003924,GO:0046872,GO:0007189,GO:0007193,GO:0007188,GO:0007049,GO:0051301,GO:0008283,GO:0007213,GO:0001973,GO:0007186,GO:0007214,GO:0140199,GO:2001234,GO:0045955,GO:1903614,GO:0050805,GO:0030335,GO:0008284,GO:0070374,GO:…	cell body|centrosome|cytoplasm|cytosol|dendrite|heterotrimeric G-protein complex|membrane|membrane raft|midbody|nucleoplasm|nucleus|plasma membrane|synapse|G protein-coupled receptor binding|G-protein beta/gamma-subunit complex binding|GTP binding|GTPase activity|metal ion binding|adenylate cyclase-activating G protein-coupled receptor signaling pathway|adenylate cyclase-inhibiting G protein-coup…	mmu04015,mmu04371,mmu04071,mmu04024,mmu04022,mmu04540,mmu04611,mmu04670,mmu04062,mmu04923,mmu04915,mmu04914,mmu04921,mmu04926,mmu04935,mmu04928,mmu04916,mmu04924,mmu04261,mmu04971,mmu04724,mmu04727,mmu04725,mmu04728,mmu04726,mmu04730,mmu04723,mmu04360,mmu04713,mmu05200,mmu05207,mmu05170,mmu05163,mmu05133,mmu05145,mmu05142,mmu05012,mmu05030,mmu05032,mmu05034,mmu04934	Rap1 signaling pathway|Apelin signaling pathway|Sphingolipid signaling pathway|cAMP signaling pathway|cGMP-PKG signaling pathway|Gap junction|Platelet activation|Leukocyte transendothelial migration|Chemokine signaling pathway|Regulation of lipolysis in adipocytes|Estrogen signaling pathway|Progesterone-mediated oocyte maturation|Oxytocin signaling pathway|Relaxin signaling pathway|Growth hormone…	KOG0082	[DT]	G-protein alpha subunit (small G protein superfamily)	Cell cycle control, cell division, chromosome partitioning |Signal transduction mechanisms	KOG0082	S	G-protein beta/gamma-subunit complex binding	Function unknown	PF00503	G-alpha	G-protein alpha subunit
P09055	Itgb1	16412	Integrin beta-1	GO:0001669,GO:0005912,GO:0005604,GO:0009986,GO:0005911,GO:0005737,GO:0043197,GO:0009897,GO:0030175,GO:0005925,GO:0097386,GO:0098978,GO:0030056,GO:0099055,GO:0099699,GO:0034665,GO:0034680,GO:0034681,GO:0034666,GO:0034667,GO:0034674,GO:0034677,GO:0034679,GO:0008305,GO:0014704,GO:0030027,GO:0042470,GO:0016020,GO:0045121,GO:0035748,GO:0031594,GO:0048471,GO:0005886,GO:0045211,GO:0043235,GO:0055037,GO:…	acrosomal vesicle|adherens junction|basement membrane|cell surface|cell-cell junction|cytoplasm|dendritic spine|external side of plasma membrane|filopodium|focal adhesion|glial cell projection|glutamatergic synapse|hemidesmosome|integral component of postsynaptic membrane|integral component of synaptic membrane|integrin alpha1-beta1 complex|integrin alpha10-beta1 complex|integrin alpha11-beta1 co…	mmu04015,mmu04151,mmu04512,mmu04514,mmu04145,mmu04510,mmu04530,mmu04810,mmu04611,mmu04670,mmu04360,mmu05200,mmu05205,mmu05222,mmu05165,mmu05135,mmu05133,mmu05100,mmu05145,mmu05140,mmu05410,mmu05412,mmu05414	Rap1 signaling pathway|PI3K-Akt signaling pathway|ECM-receptor interaction|Cell adhesion molecules|Phagosome|Focal adhesion|Tight junction|Regulation of actin cytoskeleton|Platelet activation|Leukocyte transendothelial migration|Axon guidance|Pathways in cancer|Proteoglycans in cancer|Small cell lung cancer|Human papillomavirus infection|Yersinia infection|Pertussis|Bacterial invasion of epitheli…	KOG1226	[TW]	Integrin beta subunit (N-terminal portion of extracellular region)	Signal transduction mechanisms |Extracellular structures	KOG1226	M	integrin-mediated signaling pathway	Cell wall/membrane/envelope biogenesis	PF00362	Integrin_beta	Integrin beta chain VWA domain
P09103	P4hb	18453	Protein disulfide-isomerase	GO:0005856,GO:0005829,GO:0005783,GO:0034663,GO:0005788,GO:0005793,GO:0009897,GO:0030027,GO:0042470,GO:0016222,GO:0032991,GO:0003779,GO:0019899,GO:0005178,GO:0004656,GO:0003756,GO:0046982,GO:0044877,GO:0015035,GO:0016972,GO:0071456,GO:0098761,GO:0018401,GO:0045785,GO:1900026,GO:0046598,GO:0006457,GO:0034975,GO:1902175,GO:0034976	cytoskeleton|cytosol|endoplasmic reticulum|endoplasmic reticulum chaperone complex|endoplasmic reticulum lumen|endoplasmic reticulum-Golgi intermediate compartment|external side of plasma membrane|lamellipodium|melanosome|procollagen-proline 4-dioxygenase complex|protein-containing complex|actin binding|enzyme binding|integrin binding|procollagen-proline 4-dioxygenase activity|protein disulfide i…	mmu04141	Protein processing in endoplasmic reticulum	KOG0190	[O]	Protein disulfide isomerase (prolyl 4-hydroxylase beta subunit)	Posttranslational modification, protein turnover, chaperones	KOG0190	C	intramolecular oxidoreductase activity, transposing S-S bonds	Energy production and conversion	PF00085	Thioredoxin	Thioredoxin
P09405	Ncl	17975	Nucleolin	GO:0005938,GO:0009986,GO:0005694,GO:0005737,GO:0036464,GO:0001651,GO:0001650,GO:0005730,GO:0005654,GO:0005634,GO:1990904,GO:0005681,GO:0005509,GO:0044547,GO:1990631,GO:0042393,GO:0042802,GO:0043236,GO:0048027,GO:0008022,GO:0003723,GO:0042134,GO:0035368,GO:0043565,GO:0005102,GO:0003697,GO:0042162,GO:0001525,GO:0071364,GO:1990830,GO:0071222,GO:0006897,GO:0043066,GO:0017148,GO:0032755,GO:0048026,GO:…	cell cortex|cell surface|chromosome|cytoplasm|cytoplasmic ribonucleoprotein granule|dense fibrillar component|fibrillar center|nucleolus|nucleoplasm|nucleus|ribonucleoprotein complex|spliceosomal complex|calcium ion binding|DNA topoisomerase binding|ErbB-4 class receptor binding|histone binding|identical protein binding|laminin binding|mRNA 5'-UTR binding|protein C-terminus binding|RNA binding|rR…			KOG0123	[AJ]	Polyadenylate-binding protein (RRM superfamily)	RNA processing and modification |Translation, ribosomal structure and biogenesis	KOG0123	J	RNA binding	Translation, ribosomal structure and biogenesis	PF00076	RRM_1	RNA recognition motif. (a.k.a. RRM, RBD, or RNP domain)
P09411	Pgk1	18655	Phosphoglycerate kinase 1	GO:0005737,GO:0005829,GO:0005615,GO:0045121,GO:0043531,GO:0005524,GO:0004618,GO:0047134,GO:0005975,GO:0071456,GO:0030855,GO:0006094,GO:0006096,GO:0016525,GO:0016310,GO:0031639	cytoplasm|cytosol|extracellular space|membrane raft|ADP binding|ATP binding|phosphoglycerate kinase activity|protein-disulfide reductase (NAD(P)) activity|carbohydrate metabolic process|cellular response to hypoxia|epithelial cell differentiation|gluconeogenesis|glycolytic process|negative regulation of angiogenesis|phosphorylation|plasminogen activation	mmu00010,mmu04066	Glycolysis / Gluconeogenesis|HIF-1 signaling pathway	KOG1367	[G]	3-phosphoglycerate kinase	Carbohydrate transport and metabolism	KOG1367	G	phosphoglycerate kinase activity	Carbohydrate transport and metabolism	PF00162	PGK	Phosphoglycerate kinase
P09528	Fth1	14319	Ferritin heavy chain	GO:0044754,GO:0005737,GO:0071682,GO:0005576,GO:0005739,GO:0008199,GO:0008198,GO:0004322,GO:0005506,GO:0006955,GO:0006880,GO:0006826,GO:0008285,GO:0048147	autolysosome|cytoplasm|endocytic vesicle lumen|extracellular region|mitochondrion|ferric iron binding|ferrous iron binding|ferroxidase activity|iron ion binding|immune response|intracellular sequestering of iron ion|iron ion transport|negative regulation of cell population proliferation|negative regulation of fibroblast proliferation	mmu04216,mmu04217,mmu04978	Ferroptosis|Necroptosis|Mineral absorption	KOG2332	[P]	Ferritin	Inorganic ion transport and metabolism	KOG2332	P	ferric iron binding	Inorganic ion transport and metabolism	PF00210	Ferritin	Ferritin-like domain
P09535	Igf2	16002	Insulin-like growth factor II	GO:0062023,GO:0005615,GO:0008083,GO:0005179,GO:0005158,GO:0005159,GO:0005178,GO:0043539,GO:0048018,GO:0009887,GO:0001892,GO:0060669,GO:0031017,GO:0006006,GO:0001701,GO:0038028,GO:0007613,GO:0051148,GO:0045953,GO:0000122,GO:0001649,GO:0042104,GO:0045766,GO:0043536,GO:0043085,GO:0051781,GO:0008284,GO:2000467,GO:0045725,GO:0046628,GO:0043410,GO:0045840,GO:0040018,GO:0046622,GO:0050731,GO:0051897,GO:…	collagen-containing extracellular matrix|extracellular space|growth factor activity|hormone activity|insulin receptor binding|insulin-like growth factor receptor binding|integrin binding|protein serine/threonine kinase activator activity|receptor ligand activity|animal organ morphogenesis|embryonic placenta development|embryonic placenta morphogenesis|exocrine pancreas development|glucose metabol…	mmu04010,mmu04014,mmu04151,mmu05200,mmu05205,mmu05225	MAPK signaling pathway|Ras signaling pathway|PI3K-Akt signaling pathway|Pathways in cancer|Proteoglycans in cancer|Hepatocellular carcinoma					ENOG502S0I0	O	insulin receptor signaling pathway via phosphatidylinositol 3-kinase	Posttranslational modification, protein turnover, chaperones	PF00049	Insulin	Insulin/IGF/Relaxin family
P09671	Sod2	20656	Superoxide dismutase [Mn], mitochondrial	GO:0005737,GO:0005743,GO:0005759,GO:0042645,GO:0005739,GO:0043209,GO:0003677,GO:0019899,GO:0042802,GO:0030145,GO:0016491,GO:0019825,GO:0004784,GO:0003069,GO:0001306,GO:0001315,GO:0008637,GO:0071361,GO:0003032,GO:0048773,GO:0006749,GO:0007507,GO:0030097,GO:0050665,GO:0042743,GO:0008630,GO:0008631,GO:0055072,GO:0001889,GO:0007626,GO:0007005,GO:0043066,GO:0008285,GO:0045599,GO:0048147,GO:1902631,GO:…	cytoplasm|mitochondrial inner membrane|mitochondrial matrix|mitochondrial nucleoid|mitochondrion|myelin sheath|DNA binding|enzyme binding|identical protein binding|manganese ion binding|oxidoreductase activity|oxygen binding|superoxide dismutase activity|acetylcholine-mediated vasodilation involved in regulation of systemic arterial blood pressure|age-dependent response to oxidative stress|age-de…	mmu04068,mmu04146,mmu04211,mmu04213,mmu05208,mmu05016,mmu05417	FoxO signaling pathway|Peroxisome|Longevity regulating pathway|Longevity regulating pathway - multiple species|Chemical carcinogenesis - reactive oxygen species|Huntington disease|Lipid and atherosclerosis	KOG0876	[P]	Manganese superoxide dismutase	Inorganic ion transport and metabolism	KOG0876	P	oxidoreductase activity, acting on superoxide radicals as acceptor	Inorganic ion transport and metabolism	PF00081	Sod_Fe_N	Iron/manganese superoxide dismutases, alpha-hairpin domain
P0DN34	Ndufb1	102631912	NADH dehydrogenase [ubiquinone] 1 beta subcomplex subunit 1	GO:0005747,GO:0005739,GO:0016607,GO:0032981	mitochondrial respiratory chain complex I|mitochondrion|nuclear speck|mitochondrial respiratory chain complex I assembly											PF08040	NADH_oxidored	MNLL subunit
P0DOV2	Ifi204	15951	Interferon-activable protein 204	GO:0005829,GO:0042405,GO:0016607,GO:0005730,GO:0005654,GO:0005634,GO:0001227,GO:0003690,GO:0042802,GO:0000978,GO:0003712,GO:0002218,GO:0035457,GO:0035458,GO:0048839,GO:0042771,GO:0032731,GO:0045669,GO:0006357,GO:0009617	cytosol|nuclear inclusion body|nuclear speck|nucleolus|nucleoplasm|nucleus|DNA-binding transcription repressor activity, RNA polymerase II-specific|double-stranded DNA binding|identical protein binding|RNA polymerase II cis-regulatory region sequence-specific DNA binding|transcription coregulator activity|activation of innate immune response|cellular response to interferon-alpha|cellular response…	mmu04621	NOD-like receptor signaling pathway					ENOG502QTQS	S	cellular response to interferon-beta	Function unknown	PF02758	PYRIN	PAAD/DAPIN/Pyrin domain
P0DP26	Calm1	12314	Calmodulin-1	GO:0034704,GO:1902494,GO:0005813,GO:0005737,GO:0005829,GO:0030426,GO:0031966,GO:0043209,GO:0043005,GO:0005654,GO:0005634,GO:0005886,GO:0030017,GO:0005876,GO:0000922,GO:0030672,GO:0008076,GO:0010856,GO:0008179,GO:0019855,GO:0005509,GO:0048306,GO:0097718,GO:0030234,GO:0031997,GO:0050998,GO:0030235,GO:0043548,GO:0019904,GO:0019901,GO:0047485,GO:0072542,GO:0031432,GO:0044325,GO:0031800,GO:0007190,GO:…	calcium channel complex|catalytic complex|centrosome|cytoplasm|cytosol|growth cone|mitochondrial membrane|myelin sheath|neuron projection|nucleoplasm|nucleus|plasma membrane|sarcomere|spindle microtubule|spindle pole|synaptic vesicle membrane|voltage-gated potassium channel complex|adenylate cyclase activator activity|adenylate cyclase binding|calcium channel inhibitor activity|calcium ion bindin…	mmu04014,mmu04015,mmu04371,mmu04020,mmu04070,mmu04024,mmu04022,mmu04114,mmu04218,mmu04625,mmu04910,mmu04922,mmu04912,mmu04915,mmu04921,mmu04916,mmu04924,mmu04925,mmu04261,mmu04270,mmu04970,mmu04971,mmu04728,mmu04720,mmu04722,mmu04744,mmu04740,mmu04750,mmu04713,mmu05200,mmu05214,mmu05170,mmu05163,mmu05167,mmu05133,mmu05152,mmu05010,mmu05012,mmu05022,mmu05031,mmu05034,mmu05417,mmu05418	Ras signaling pathway|Rap1 signaling pathway|Apelin signaling pathway|Calcium signaling pathway|Phosphatidylinositol signaling system|cAMP signaling pathway|cGMP-PKG signaling pathway|Oocyte meiosis|Cellular senescence|C-type lectin receptor signaling pathway|Insulin signaling pathway|Glucagon signaling pathway|GnRH signaling pathway|Estrogen signaling pathway|Oxytocin signaling pathway|Melanogen…	KOG0027	[T]	Calmodulin and related proteins (EF-Hand superfamily)	Signal transduction mechanisms	KOG0027	D	Calcium-binding protein	Cell cycle control, cell division, chromosome partitioning	PF13499	EF-hand_7	EF-hand domain pair
P10107	Anxa1	16952	Annexin A1	GO:0005884,GO:0016324,GO:0016323,GO:0009986,GO:0062023,GO:0001533,GO:0005737,GO:0005829,GO:0031901,GO:0005768,GO:0070062,GO:0005615,GO:0031313,GO:0031232,GO:0019898,GO:0016328,GO:0042629,GO:0031966,GO:0031514,GO:0005654,GO:0005634,GO:0001891,GO:0005886,GO:0032991,GO:0042383,GO:0097060,GO:0005509,GO:0005544,GO:0048306,GO:1990814,GO:0036121,GO:0042802,GO:0019834,GO:0005543,GO:0003697,GO:0003727,GO:…	actin filament|apical plasma membrane|basolateral plasma membrane|cell surface|collagen-containing extracellular matrix|cornified envelope|cytoplasm|cytosol|early endosome membrane|endosome|extracellular exosome|extracellular space|extrinsic component of endosome membrane|extrinsic component of external side of plasma membrane|extrinsic component of membrane|lateral plasma membrane|mast cell gran…			KOG0819	[U]	Annexin	Intracellular trafficking, secretion, and vesicular transport	KOG0819	L	calcium-dependent phospholipid binding	Replication, recombination and repair	PF00191	Annexin	Annexin
P10126	Eef1a1	13627	Elongation factor 1-alpha 1	GO:0030864,GO:0005737,GO:0005829,GO:0043209,GO:0005730,GO:0005634,GO:0005886,GO:0032587,GO:0005516,GO:0005525,GO:0003924,GO:0042802,GO:0019900,GO:0003729,GO:0019901,GO:0003746,GO:0000049,GO:0071364,GO:1903427,GO:0010942,GO:0010976,GO:1900022,GO:0006412,GO:0006414	cortical actin cytoskeleton|cytoplasm|cytosol|myelin sheath|nucleolus|nucleus|plasma membrane|ruffle membrane|calmodulin binding|GTP binding|GTPase activity|identical protein binding|kinase binding|mRNA binding|protein kinase binding|translation elongation factor activity|tRNA binding|cellular response to epidermal growth factor stimulus|negative regulation of reactive oxygen species biosynthetic…	mmu03013,mmu05134,mmu05140	Nucleocytoplasmic transport|Legionellosis|Leishmaniasis	KOG0052	[J]	Translation elongation factor EF-1 alpha/Tu	Translation, ribosomal structure and biogenesis	KOG0052	J	translation elongation factor activity	Translation, ribosomal structure and biogenesis	PF00009	GTP_EFTU	Elongation factor Tu GTP binding domain
P10518	Alad	17025	Delta-aminolevulinic acid dehydratase	GO:0005829,GO:0005615,GO:0042802,GO:0004655,GO:1904854,GO:0008270,GO:0071353,GO:0071284,GO:0006783,GO:1901799,GO:0051260,GO:0006782,GO:0014823,GO:0010044,GO:0043200,GO:0046685,GO:0046686,GO:0032025,GO:0042493,GO:0045471,GO:0070542,GO:0051384,GO:0009635,GO:0001666,GO:0010212,GO:0010039,GO:0032496,GO:0046689,GO:0010038,GO:0051597,GO:0007584,GO:0010033,GO:0006979,GO:0070541,GO:0010269,GO:0010266,GO:…	cytosol|extracellular space|identical protein binding|porphobilinogen synthase activity|proteasome core complex binding|zinc ion binding|cellular response to interleukin-4|cellular response to lead ion|heme biosynthetic process|negative regulation of proteasomal protein catabolic process|protein homooligomerization|protoporphyrinogen IX biosynthetic process|response to activity|response to alumin…	mmu00860	Porphyrin metabolism	KOG2794	[H]	Delta-aminolevulinic acid dehydratase	Coenzyme transport and metabolism	KOG2794	H	porphobilinogen synthase activity	Coenzyme transport and metabolism	PF00490	ALAD	Delta-aminolevulinic acid dehydratase
P10605	Ctsb	13030	Cathepsin B	GO:0016324,GO:0009986,GO:0062023,GO:0005737,GO:0009897,GO:0005576,GO:0005615,GO:0005764,GO:0042470,GO:0005739,GO:0048471,GO:0042383,GO:0005518,GO:0004197,GO:0008234,GO:0004175,GO:0030984,GO:0008233,GO:0042277,GO:0043621,GO:0044877,GO:0043394,GO:0097067,GO:0030574,GO:0046697,GO:0030855,GO:0060548,GO:0006508,GO:0051603,GO:0050790,GO:0006590,GO:0046718	apical plasma membrane|cell surface|collagen-containing extracellular matrix|cytoplasm|external side of plasma membrane|extracellular region|extracellular space|lysosome|melanosome|mitochondrion|perinuclear region of cytoplasm|sarcolemma|collagen binding|cysteine-type endopeptidase activity|cysteine-type peptidase activity|endopeptidase activity|kininogen binding|peptidase activity|peptide bindin…	mmu04142,mmu04140,mmu04210,mmu04621,mmu04612,mmu04924	Lysosome|Autophagy - animal|Apoptosis|NOD-like receptor signaling pathway|Antigen processing and presentation|Renin secretion	KOG1543	[O]	Cysteine proteinase Cathepsin L	Posttranslational modification, protein turnover, chaperones	KOG1543	O	cysteine-type peptidase activity	Posttranslational modification, protein turnover, chaperones	PF00112	Peptidase_C1	Papain family cysteine protease
P10630	Eif4a2	13682	Eukaryotic initiation factor 4A-II	GO:0048471,GO:0005524,GO:0140603,GO:0003724,GO:0003743,GO:1990830,GO:0002183,GO:1900260	perinuclear region of cytoplasm|ATP binding|ATP hydrolysis activity|RNA helicase activity|translation initiation factor activity|cellular response to leukemia inhibitory factor|cytoplasmic translational initiation|negative regulation of RNA-directed 5'-3' RNA polymerase activity			KOG0327	[J]	Translation initiation factor 4F, helicase subunit (eIF-4A) and related helicases	Translation, ribosomal structure and biogenesis	KOG0327	J	helicase activity	Translation, ribosomal structure and biogenesis	PF00270	DEAD	DEAD/DEAH box helicase
P10639	Txn	22166	Thioredoxin	GO:0030424,GO:0005737,GO:0005829,GO:0030425,GO:0005576,GO:0005739,GO:0043025,GO:0005654,GO:0005634,GO:0019899,GO:0042803,GO:0047134,GO:0015035,GO:0045454,GO:0006662,GO:1903206,GO:0046826,GO:0000122,GO:0043388,GO:2000170,GO:0033138,GO:0071731,GO:0009314	axon|cytoplasm|cytosol|dendrite|extracellular region|mitochondrion|neuronal cell body|nucleoplasm|nucleus|enzyme binding|protein homodimerization activity|protein-disulfide reductase (NAD(P)) activity|protein-disulfide reductase activity|cell redox homeostasis|glycerol ether metabolic process|negative regulation of hydrogen peroxide-induced cell death|negative regulation of protein export from nu…	mmu04621,mmu05132,mmu05012,mmu05418	NOD-like receptor signaling pathway|Salmonella infection|Parkinson disease|Fluid shear stress and atherosclerosis	KOG0907	[O]	Thioredoxin	Posttranslational modification, protein turnover, chaperones	KOG0907	C	cell redox homeostasis	Energy production and conversion	PF00085	Thioredoxin	Thioredoxin
P10649	Gstm1	14862	Glutathione S-transferase Mu 1	GO:0005829,GO:0005576,GO:0045171,GO:0043209,GO:0032991,GO:0043295,GO:0004364,GO:0042802,GO:0016151,GO:0019901,GO:0005496,GO:0035690,GO:1901687,GO:0006749,GO:0051122,GO:0006693,GO:0042178	cytosol|extracellular region|intercellular bridge|myelin sheath|protein-containing complex|glutathione binding|glutathione transferase activity|identical protein binding|nickel cation binding|protein kinase binding|steroid binding|cellular response to drug|glutathione derivative biosynthetic process|glutathione metabolic process|hepoxilin biosynthetic process|prostaglandin metabolic process|xenob…	mmu00480,mmu00980,mmu00982,mmu00983,mmu05200,mmu05204,mmu05207,mmu05208,mmu05225,mmu05418,mmu01524	Glutathione metabolism|Metabolism of xenobiotics by cytochrome P450|Drug metabolism - cytochrome P450|Drug metabolism - other enzymes|Pathways in cancer|Chemical carcinogenesis - DNA adducts|Chemical carcinogenesis - receptor activation|Chemical carcinogenesis - reactive oxygen species|Hepatocellular carcinoma|Fluid shear stress and atherosclerosis|Platinum drug resistance	KOG1695	[O]	Glutathione S-transferase	Posttranslational modification, protein turnover, chaperones	KOG1695	O	glutathione transferase activity	Posttranslational modification, protein turnover, chaperones	PF02798	GST_N	Glutathione S-transferase, N-terminal domain
P10711	Tcea1	21399	Transcription elongation factor A protein 1	GO:0005730,GO:0005654,GO:0005669,GO:0003677,GO:0008270,GO:0030218,GO:0045944,GO:0045893,GO:0006351	nucleolus|nucleoplasm|transcription factor TFIID complex|DNA binding|zinc ion binding|erythrocyte differentiation|positive regulation of transcription by RNA polymerase II|positive regulation of transcription, DNA-templated|transcription, DNA-templated			KOG1105	[K]	Transcription elongation factor TFIIS/Cofactor of enhancer-binding protein Sp1	Transcription	KOG1105	K	transcription, DNA-templated	Transcription	PF01096	TFIIS_C	Transcription factor S-II (TFIIS)
P10852	Slc3a2	17254	4F2 cell-surface antigen heavy chain	GO:1990184,GO:0016324,GO:0044225,GO:0009925,GO:0016323,GO:0009986,GO:0016021,GO:0005765,GO:0042470,GO:0043025,GO:0005654,GO:0005886,GO:0045202,GO:0015173,GO:0003824,GO:0003725,GO:0015180,GO:0015190,GO:0015175,GO:0005975,GO:1904273,GO:1903801,GO:0098713,GO:0015820,GO:0015804,GO:0015823,GO:0043330,GO:0015827,GO:0046718	amino acid transport complex|apical plasma membrane|apical pole of neuron|basal plasma membrane|basolateral plasma membrane|cell surface|integral component of membrane|lysosomal membrane|melanosome|neuronal cell body|nucleoplasm|plasma membrane|synapse|aromatic amino acid transmembrane transporter activity|catalytic activity|double-stranded RNA binding|L-alanine transmembrane transporter activity…	mmu04150,mmu04216,mmu04974	mTOR signaling pathway|Ferroptosis|Protein digestion and absorption	KOG0471	[G]	Alpha-amylase	Carbohydrate transport and metabolism	KOG0471	G	alpha-amylase activity	Carbohydrate transport and metabolism	PF00128	Alpha-amylase	Alpha amylase, catalytic domain
P10853	H2bc7	665622	Histone H2B type 1-F/J/L	GO:0005829,GO:0005615,GO:0005654,GO:0000786,GO:0005634,GO:0003677,GO:0042802,GO:0046982,GO:0019731,GO:0061844,GO:0050830,GO:0002227,GO:0006334	cytosol|extracellular space|nucleoplasm|nucleosome|nucleus|DNA binding|identical protein binding|protein heterodimerization activity|antibacterial humoral response|antimicrobial humoral immune response mediated by antimicrobial peptide|defense response to Gram-positive bacterium|innate immune response in mucosa|nucleosome assembly	mmu04613,mmu05203,mmu05322,mmu05034	Neutrophil extracellular trap formation|Viral carcinogenesis|Systemic lupus erythematosus|Alcoholism	KOG1744	[B]	Histone H2B	Chromatin structure and dynamics	KOG1744	B	protein heterodimerization activity	Chromatin structure and dynamics	PF00125	Histone	Core histone H2A/H2B/H3/H4
P10922	H1-0	14958	Histone H1.0	GO:0015629,GO:0000785,GO:0000791,GO:0005794,GO:0016604,GO:0005654,GO:0000786,GO:0005634,GO:0017053,GO:0031490,GO:0003690,GO:0003680,GO:0031492,GO:0006342,GO:0030261,GO:0031936,GO:0045910,GO:0000122,GO:0006334,GO:0016584,GO:2000679	actin cytoskeleton|chromatin|euchromatin|Golgi apparatus|nuclear body|nucleoplasm|nucleosome|nucleus|transcription repressor complex|chromatin DNA binding|double-stranded DNA binding|minor groove of adenine-thymine-rich DNA binding|nucleosomal DNA binding|chromatin silencing|chromosome condensation|negative regulation of chromatin silencing|negative regulation of DNA recombination|negative regula…			KOG4012	[B]	Histone H1	Chromatin structure and dynamics	KOG4012	B	nucleosome assembly	Chromatin structure and dynamics	PF00538	Linker_histone	linker histone H1 and H5 family
P11031	Sub1	20024	Activated RNA polymerase II transcriptional coactivator p15	GO:0005730,GO:0005654,GO:0005634,GO:0005667,GO:0003678,GO:0140297,GO:0042802,GO:0000978,GO:0003697,GO:0003713,GO:0051053,GO:0060261,GO:0051260,GO:0006357,GO:0060395	nucleolus|nucleoplasm|nucleus|transcription regulator complex|DNA helicase activity|DNA-binding transcription factor binding|identical protein binding|RNA polymerase II cis-regulatory region sequence-specific DNA binding|single-stranded DNA binding|transcription coactivator activity|negative regulation of DNA metabolic process|positive regulation of transcription initiation from RNA polymerase II…			KOG2712	[K]	Transcriptional coactivator	Transcription	KOG2712	S	positive regulation of transcription initiation from RNA polymerase II promoter	Function unknown	PF02229	PC4	Transcriptional Coactivator p15 (PC4)
P11087	Col1a1	12842	Collagen alpha-1(I) chain	GO:0005581,GO:0005584,GO:0062023,GO:0005737,GO:0005783,GO:0031012,GO:0005576,GO:0005615,GO:0005794,GO:0030141,GO:0005201,GO:0042802,GO:0046872,GO:0048407,GO:0002020,GO:0001568,GO:0060346,GO:0060351,GO:0071230,GO:0071364,GO:0044344,GO:1902618,GO:0071260,GO:0071300,GO:0071560,GO:0071356,GO:0071306,GO:0032964,GO:0030199,GO:0038063,GO:0048706,GO:0001958,GO:0030198,GO:0060325,GO:0001957,GO:0010812,GO:…	collagen trimer|collagen type I trimer|collagen-containing extracellular matrix|cytoplasm|endoplasmic reticulum|extracellular matrix|extracellular region|extracellular space|Golgi apparatus|secretory granule|extracellular matrix structural constituent|identical protein binding|metal ion binding|platelet-derived growth factor binding|protease binding|blood vessel development|bone trabecula formati…	mmu04151,mmu04512,mmu04510,mmu04611,mmu04926,mmu04974,mmu05205,mmu05165,mmu05146,mmu05415,mmu04933	PI3K-Akt signaling pathway|ECM-receptor interaction|Focal adhesion|Platelet activation|Relaxin signaling pathway|Protein digestion and absorption|Proteoglycans in cancer|Human papillomavirus infection|Amoebiasis|Diabetic cardiomyopathy|AGE-RAGE signaling pathway in diabetic complications	KOG3544	[W]	Collagens (type IV and type XIII), and related proteins	Extracellular structures	KOG3544	D	structural constituent of cuticle	Cell cycle control, cell division, chromosome partitioning	PF00093	VWC	von Willebrand factor type C domain
P11103	Parp1	11545	Poly [ADP-ribose] polymerase 1	GO:0005737,GO:0005739,GO:0016604,GO:0005635,GO:0005730,GO:0005654,GO:0005634,GO:0032991,GO:0032993,GO:0090734,GO:0035861,GO:0005667,GO:0003682,GO:0003677,GO:0019899,GO:0030331,GO:0042826,GO:0042802,GO:0051287,GO:0140294,GO:0003950,GO:1990404,GO:0019901,GO:0047485,GO:0070412,GO:0046332,GO:0008270,GO:0006915,GO:1990966,GO:0006284,GO:0048148,GO:1904646,GO:0006974,GO:0032869,GO:0034599,GO:0071451,GO:…	cytoplasm|mitochondrion|nuclear body|nuclear envelope|nucleolus|nucleoplasm|nucleus|protein-containing complex|protein-DNA complex|site of DNA damage|site of double-strand break|transcription regulator complex|chromatin binding|DNA binding|enzyme binding|estrogen receptor binding|histone deacetylase binding|identical protein binding|NAD binding|NAD DNA ADP-ribosyltransferase activity|NAD+ ADP-rib…	mmu03410,mmu04064,mmu04210,mmu04217,mmu05415	Base excision repair|NF-kappa B signaling pathway|Apoptosis|Necroptosis|Diabetic cardiomyopathy	KOG1037	[KLO]	NAD+ ADP-ribosyltransferase Parp, required for poly-ADP ribosylation of nuclear proteins	Transcription |Replication, recombination and repair |Posttranslational modification, protein turnover, chaperones	KOG1037	H	NAD+ ADP-ribosyltransferase activity	Coenzyme transport and metabolism	PF00533	BRCT	BRCA1 C Terminus (BRCT) domain
P11276	Fn1	14268	Fibronectin	GO:0016324,GO:0005604,GO:0062023,GO:0005793,GO:0070062,GO:0031012,GO:0005615,GO:0005577,GO:0051087,GO:0097718,GO:0019899,GO:0008201,GO:0042802,GO:0005178,GO:0045340,GO:0016504,GO:0002020,GO:0008022,GO:0043394,GO:0005102,GO:0006953,GO:0001525,GO:0051702,GO:0072378,GO:0007161,GO:0001775,GO:0007155,GO:0007160,GO:0007044,GO:0071347,GO:0071288,GO:0035987,GO:0030198,GO:0008347,GO:0007507,GO:0033622,GO:…	apical plasma membrane|basement membrane|collagen-containing extracellular matrix|endoplasmic reticulum-Golgi intermediate compartment|extracellular exosome|extracellular matrix|extracellular space|fibrinogen complex|chaperone binding|disordered domain specific binding|enzyme binding|heparin binding|identical protein binding|integrin binding|mercury ion binding|peptidase activator activity|protea…	mmu04151,mmu04512,mmu04510,mmu04810,mmu05200,mmu05205,mmu05222,mmu05165,mmu05135,mmu05100,mmu05146,mmu04933	PI3K-Akt signaling pathway|ECM-receptor interaction|Focal adhesion|Regulation of actin cytoskeleton|Pathways in cancer|Proteoglycans in cancer|Small cell lung cancer|Human papillomavirus infection|Yersinia infection|Bacterial invasion of epithelial cells|Amoebiasis|AGE-RAGE signaling pathway in diabetic complications					ENOG502QPTS	S	fibronectin	Function unknown	PF00039	fn1	Fibronectin type I domain
P11438	Lamp1	16783	Lysosome-associated membrane glycoprotein 1	GO:0097208,GO:0044754,GO:0000421,GO:0009986,GO:0044194,GO:0101004,GO:0005737,GO:0031410,GO:0005829,GO:0030425,GO:0005768,GO:0010008,GO:0009897,GO:0030285,GO:0005770,GO:0031902,GO:0005765,GO:0005764,GO:0042470,GO:0005771,GO:0043025,GO:0048471,GO:0045335,GO:0061474,GO:0005886,GO:0042383,GO:0008021,GO:0005773,GO:0031982,GO:0019899,GO:0019904,GO:0048102,GO:0072594,GO:0090160,GO:0140507,GO:0043323,GO:…	alveolar lamellar body|autolysosome|autophagosome membrane|cell surface|cytolytic granule|cytolytic granule membrane|cytoplasm|cytoplasmic vesicle|cytosol|dendrite|endosome|endosome membrane|external side of plasma membrane|integral component of synaptic vesicle membrane|late endosome|late endosome membrane|lysosomal membrane|lysosome|melanosome|multivesicular body|neuronal cell body|perinuclear …	mmu04145,mmu04142,mmu04140,mmu05152	Phagosome|Lysosome|Autophagy - animal|Tuberculosis	KOG4818	[R]	Lysosomal-associated membrane protein	General function prediction only	KOG4818	J	protein targeting to lysosome involved in chaperone-mediated autophagy	Translation, ribosomal structure and biogenesis	PF01299	Lamp	Lysosome-associated membrane glycoprotein (Lamp)
P11440	Cdk1	12534	Cyclin-dependent kinase 1	GO:0005813,GO:0097125,GO:0000307,GO:0005737,GO:0005829,GO:0030496,GO:0005739,GO:0072686,GO:0005654,GO:0005634,GO:0005876,GO:0005524,GO:0003682,GO:0030332,GO:0097472,GO:0004693,GO:0035173,GO:0030544,GO:0016301,GO:0004672,GO:0106310,GO:0004674,GO:0106311,GO:0008353,GO:0031100,GO:0006915,GO:0007569,GO:0051301,GO:0008283,GO:0030261,GO:0000086,GO:0090166,GO:0044772,GO:0007095,GO:0043066,GO:0010629,GO:…	centrosome|cyclin B1-CDK1 complex|cyclin-dependent protein kinase holoenzyme complex|cytoplasm|cytosol|midbody|mitochondrion|mitotic spindle|nucleoplasm|nucleus|spindle microtubule|ATP binding|chromatin binding|cyclin binding|cyclin-dependent protein kinase activity|cyclin-dependent protein serine/threonine kinase activity|histone kinase activity|Hsp70 protein binding|kinase activity|protein kina…	mmu04110,mmu04114,mmu04115,mmu04218,mmu04540,mmu04914,mmu05203,mmu05170	Cell cycle|Oocyte meiosis|p53 signaling pathway|Cellular senescence|Gap junction|Progesterone-mediated oocyte maturation|Viral carcinogenesis|Human immunodeficiency virus 1 infection	KOG0594	[R]	Protein kinase PCTAIRE and related kinases	General function prediction only	KOG0594	G	cyclin-dependent protein serine/threonine kinase activity	Carbohydrate transport and metabolism	PF00069	Pkinase	Protein kinase domain
P11499	Hsp90ab1	15516	Heat shock protein HSP 90-beta	GO:0016324,GO:0034751,GO:0044295,GO:0016323,GO:0031526,GO:0009986,GO:0008180,GO:0005737,GO:0005829,GO:0044294,GO:0120293,GO:0005576,GO:1990565,GO:0016234,GO:0005765,GO:0042470,GO:0005739,GO:0043025,GO:0005634,GO:1990917,GO:0048471,GO:0005886,GO:0032991,GO:1990913,GO:0005524,GO:0043008,GO:0002135,GO:0032564,GO:0097718,GO:0070182,GO:0003725,GO:0005525,GO:0031072,GO:0042826,GO:1990226,GO:0042802,GO:…	apical plasma membrane|aryl hydrocarbon receptor complex|axonal growth cone|basolateral plasma membrane|brush border membrane|cell surface|COP9 signalosome|cytoplasm|cytosol|dendritic growth cone|dynein axonemal particle|extracellular region|HSP90-CDC37 chaperone complex|inclusion body|lysosomal membrane|melanosome|mitochondrion|neuronal cell body|nucleus|ooplasm|perinuclear region of cytoplasm|p…	mmu04141,mmu04151,mmu04217,mmu04621,mmu04612,mmu04659,mmu04657,mmu04915,mmu04914,mmu05200,mmu05207,mmu05215,mmu05132,mmu05417,mmu05418	Protein processing in endoplasmic reticulum|PI3K-Akt signaling pathway|Necroptosis|NOD-like receptor signaling pathway|Antigen processing and presentation|Th17 cell differentiation|IL-17 signaling pathway|Estrogen signaling pathway|Progesterone-mediated oocyte maturation|Pathways in cancer|Chemical carcinogenesis - receptor activation|Prostate cancer|Salmonella infection|Lipid and atherosclerosis…	KOG0019	[O]	Molecular chaperone (HSP90 family)	Posttranslational modification, protein turnover, chaperones	KOG0019	O	unfolded protein binding	Posttranslational modification, protein turnover, chaperones	PF00183	HSP90	Hsp90 protein
P11983	Tcp1	21454	T-complex protein 1 subunit alpha	GO:0001669,GO:0044297,GO:0005813,GO:0005832,GO:0005794,GO:0000792,GO:0005874,GO:0005815,GO:0043209,GO:0000242,GO:0002199,GO:0005524,GO:0044183,GO:0031625,GO:0051082,GO:0007339,GO:1904851,GO:0051973,GO:1904874,GO:0032212,GO:0006457,GO:0050821,GO:2000109,GO:0090666,GO:1901998,GO:0044053	acrosomal vesicle|cell body|centrosome|chaperonin-containing T-complex|Golgi apparatus|heterochromatin|microtubule|microtubule organizing center|myelin sheath|pericentriolar material|zona pellucida receptor complex|ATP binding|protein folding chaperone|ubiquitin protein ligase binding|unfolded protein binding|binding of sperm to zona pellucida|positive regulation of establishment of protein local…			KOG0360	[O]	Chaperonin complex component, TCP-1 alpha subunit (CCT1)	Posttranslational modification, protein turnover, chaperones	KOG0360	O	translocation of peptides or proteins into other organism involved in symbiotic interaction	Posttranslational modification, protein turnover, chaperones	PF00118	Cpn60_TCP1	TCP-1/cpn60 chaperonin family
P12367	Prkar2a	19087	cAMP-dependent protein kinase type II-alpha regulatory subunit	GO:0005952,GO:0005813,GO:0005737,GO:0005829,GO:0098978,GO:0031588,GO:0048471,GO:0005886,GO:0044853,GO:0032991,GO:0045202,GO:0030315,GO:0031698,GO:0030552,GO:0004862,GO:0008603,GO:0042802,GO:0019904,GO:0034236,GO:0044877,GO:0036094,GO:0031625,GO:0050804,GO:2000480,GO:0043949,GO:0010738,GO:0045859	cAMP-dependent protein kinase complex|centrosome|cytoplasm|cytosol|glutamatergic synapse|nucleotide-activated protein kinase complex|perinuclear region of cytoplasm|plasma membrane|plasma membrane raft|protein-containing complex|synapse|T-tubule|beta-2 adrenergic receptor binding|cAMP binding|cAMP-dependent protein kinase inhibitor activity|cAMP-dependent protein kinase regulator activity|identic…	mmu04910	Insulin signaling pathway	KOG1113	[T]	cAMP-dependent protein kinase types I and II, regulatory subunit	Signal transduction mechanisms	KOG1113	T	cAMP-dependent protein kinase regulator activity	Signal transduction mechanisms	PF00027	cNMP_binding	Cyclic nucleotide-binding domain
P12382	Pfkl	18641	ATP-dependent 6-phosphofructokinase, liver type	GO:0005945,GO:0005829,GO:0016020,GO:0003872,GO:0016208,GO:0005524,GO:0070061,GO:0070095,GO:0042802,GO:0019900,GO:0046872,GO:0048029,GO:0061621,GO:0005975,GO:0030388,GO:0006002,GO:0006096,GO:0061615,GO:0046676,GO:0009749	6-phosphofructokinase complex|cytosol|membrane|6-phosphofructokinase activity|AMP binding|ATP binding|fructose binding|fructose-6-phosphate binding|identical protein binding|kinase binding|metal ion binding|monosaccharide binding|canonical glycolysis|carbohydrate metabolic process|fructose 1,6-bisphosphate metabolic process|fructose 6-phosphate metabolic process|glycolytic process|glycolytic proc…	mmu00010,mmu00030,mmu00051,mmu00052,mmu03018,mmu04066,mmu04152,mmu04922,mmu04919,mmu05230	Glycolysis / Gluconeogenesis|Pentose phosphate pathway|Fructose and mannose metabolism|Galactose metabolism|RNA degradation|HIF-1 signaling pathway|AMPK signaling pathway|Glucagon signaling pathway|Thyroid hormone signaling pathway|Central carbon metabolism in cancer	KOG2440	[G]	Pyrophosphate-dependent phosphofructo-1-kinase	Carbohydrate transport and metabolism	KOG2440	G	6-phosphofructokinase activity	Carbohydrate transport and metabolism	PF00365	PFK	Phosphofructokinase
P12787	Cox5a	12858	Cytochrome c oxidase subunit 5A, mitochondrial	GO:0005743,GO:0005751,GO:0005739,GO:0043209,GO:0004129,GO:0046872,GO:0006123	mitochondrial inner membrane|mitochondrial respiratory chain complex IV|mitochondrion|myelin sheath|cytochrome-c oxidase activity|metal ion binding|mitochondrial electron transport, cytochrome c to oxygen	mmu00190,mmu04260,mmu04714,mmu05208,mmu05010,mmu05012,mmu05014,mmu05016,mmu05020,mmu05022,mmu05415,mmu04932	Oxidative phosphorylation|Cardiac muscle contraction|Thermogenesis|Chemical carcinogenesis - reactive oxygen species|Alzheimer disease|Parkinson disease|Amyotrophic lateral sclerosis|Huntington disease|Prion disease|Pathways of neurodegeneration - multiple diseases|Diabetic cardiomyopathy|Non-alcoholic fatty liver disease	KOG4077	[C]	Cytochrome c oxidase, subunit Va/COX6	Energy production and conversion	KOG4077	O	oxidoreductase activity, acting on a heme group of donors, oxygen as acceptor	Posttranslational modification, protein turnover, chaperones	PF02284	COX5A	Cytochrome c oxidase subunit Va
P12815	Pdcd6	18570	Programmed cell death protein 6	GO:0030127,GO:0031463,GO:0005737,GO:0031410,GO:0005829,GO:0005783,GO:0070971,GO:0005789,GO:0005768,GO:0005654,GO:0005634,GO:0005509,GO:0048306,GO:0042802,GO:0000287,GO:0046983,GO:0042803,GO:0030674,GO:0043495,GO:1990756,GO:0006919,GO:0001525,GO:0006915,GO:0034605,GO:0048208,GO:0006888,GO:0006886,GO:0051898,GO:0032007,GO:0030948,GO:0014032,GO:0014029,GO:0045766,GO:0043280,GO:0010595,GO:0001938,GO:…	COPII vesicle coat|Cul3-RING ubiquitin ligase complex|cytoplasm|cytoplasmic vesicle|cytosol|endoplasmic reticulum|endoplasmic reticulum exit site|endoplasmic reticulum membrane|endosome|nucleoplasm|nucleus|calcium ion binding|calcium-dependent protein binding|identical protein binding|magnesium ion binding|protein dimerization activity|protein homodimerization activity|protein-macromolecule adapt…			KOG0037	[T]	Ca2+-binding protein, EF-Hand protein superfamily	Signal transduction mechanisms	KOG0037	O	calcium-dependent cysteine-type endopeptidase activity	Posttranslational modification, protein turnover, chaperones	PF00036	EF-hand_1	EF hand
P12970	Rpl7a	27176	60S ribosomal protein L7a	GO:0005829,GO:0022625,GO:0022626,GO:0016020,GO:0005730,GO:0042788,GO:0005840,GO:0045202,GO:0003723,GO:0003735,GO:0000470	cytosol|cytosolic large ribosomal subunit|cytosolic ribosome|membrane|nucleolus|polysomal ribosome|ribosome|synapse|RNA binding|structural constituent of ribosome|maturation of LSU-rRNA	mmu03010,mmu05171	Ribosome|Coronavirus disease - COVID-19	KOG3166	[J]	60S ribosomal protein L7A	Translation, ribosomal structure and biogenesis	KOG3166	J	maturation of LSU-rRNA	Translation, ribosomal structure and biogenesis	PF01248	Ribosomal_L7Ae	Ribosomal protein L7Ae/L30e/S12e/Gadd45 family
P13020	Gsn	227753	Gelsolin	GO:0030478,GO:0015629,GO:0030864,GO:0005737,GO:0005829,GO:0005576,GO:0005615,GO:0030027,GO:0043209,GO:0048471,GO:0045335,GO:0005886,GO:0002102,GO:0032991,GO:0001726,GO:0016528,GO:0003779,GO:0051015,GO:0005509,GO:0045159,GO:0036313,GO:0005546,GO:0030036,GO:0051693,GO:0030042,GO:0030041,GO:0090527,GO:0051014,GO:0045010,GO:0008154,GO:0007568,GO:1990000,GO:0006915,GO:0051016,GO:0086003,GO:0030031,GO:…	actin cap|actin cytoskeleton|cortical actin cytoskeleton|cytoplasm|cytosol|extracellular region|extracellular space|lamellipodium|myelin sheath|perinuclear region of cytoplasm|phagocytic vesicle|plasma membrane|podosome|protein-containing complex|ruffle|sarcoplasm|actin binding|actin filament binding|calcium ion binding|myosin II binding|phosphatidylinositol 3-kinase catalytic subunit binding|pho…	mmu04810,mmu04666,mmu05203	Regulation of actin cytoskeleton|Fc gamma R-mediated phagocytosis|Viral carcinogenesis	KOG0443	[Z]	Actin regulatory proteins (gelsolin/villin family)	Cytoskeleton	KOG0443	S	actin filament capping	Function unknown	PF00626	Gelsolin	Gelsolin repeat
P13439	Umps	22247	Uridine 5'-monophosphate synthase	GO:0005737,GO:0005634,GO:0042802,GO:0004588,GO:0004590,GO:0006207,GO:0044205,GO:0035690,GO:0007565,GO:0007595,GO:0009116,GO:0019856,GO:0006222	cytoplasm|nucleus|identical protein binding|orotate phosphoribosyltransferase activity|orotidine-5'-phosphate decarboxylase activity|'de novo' pyrimidine nucleobase biosynthetic process|'de novo' UMP biosynthetic process|cellular response to drug|female pregnancy|lactation|nucleoside metabolic process|pyrimidine nucleobase biosynthetic process|UMP biosynthetic process	mmu00240,mmu00983	Pyrimidine metabolism|Drug metabolism - other enzymes	KOG1377	[F]	Uridine 5'- monophosphate synthase/orotate phosphoribosyltransferase	Nucleotide transport and metabolism	KOG1377	F	'de novo' UMP biosynthetic process	Nucleotide transport and metabolism	PF00156	Pribosyltran	Phosphoribosyl transferase domain
P13595	Ncam1	17967	Neural cell adhesion molecule 1	GO:0031225,GO:0030424,GO:0009986,GO:0005911,GO:0005829,GO:0009897,GO:0098978,GO:0030426,GO:0099055,GO:0099056,GO:0043209,GO:0043005,GO:0043025,GO:0005886,GO:0098685,GO:0008201,GO:0030275,GO:0019902,GO:0007568,GO:0007413,GO:0007166,GO:0071679,GO:0034109,GO:0007611,GO:0050804,GO:0033555,GO:0060548,GO:0048666,GO:0031175,GO:0050850,GO:0060045,GO:0001928,GO:2001260,GO:0051930,GO:0042220,GO:0042493,GO:…	anchored component of membrane|axon|cell surface|cell-cell junction|cytosol|external side of plasma membrane|glutamatergic synapse|growth cone|integral component of postsynaptic membrane|integral component of presynaptic membrane|myelin sheath|neuron projection|neuronal cell body|plasma membrane|Schaffer collateral - CA1 synapse|heparin binding|LRR domain binding|phosphatase binding|aging|axonal …	mmu04514,mmu05020	Cell adhesion molecules|Prion disease	KOG3510	[T]	FOG: Immunoglobulin C-2 Type/fibronectin type III domains	Signal transduction mechanisms	KOG3510	S	cell adhesion	Function unknown	PF00041	fn3	Fibronectin type III domain
P14069	S100a6	20200	Protein S100-A6	GO:0062023,GO:0005737,GO:0005829,GO:0031234,GO:0005635,GO:0005634,GO:0048471,GO:0005886,GO:0001726,GO:0005509,GO:0048306,GO:0015075,GO:0042803,GO:0044548,GO:0005523,GO:0008270	collagen-containing extracellular matrix|cytoplasm|cytosol|extrinsic component of cytoplasmic side of plasma membrane|nuclear envelope|nucleus|perinuclear region of cytoplasm|plasma membrane|ruffle|calcium ion binding|calcium-dependent protein binding|ion transmembrane transporter activity|protein homodimerization activity|S100 protein binding|tropomyosin binding|zinc ion binding							ENOG502S6IN	S	tropomyosin binding	Function unknown	PF01023	S_100	S-100/ICaBP type calcium binding domain
P14115	Rpl27a	26451	60S ribosomal protein L27a	GO:0005829,GO:0022625,GO:0022626,GO:0005783,GO:0003735,GO:0006412	cytosol|cytosolic large ribosomal subunit|cytosolic ribosome|endoplasmic reticulum|structural constituent of ribosome|translation	mmu03010,mmu05171	Ribosome|Coronavirus disease - COVID-19	KOG1742	[J]	60s ribosomal protein L15/L27	Translation, ribosomal structure and biogenesis	KOG1742	J	structural constituent of ribosome	Translation, ribosomal structure and biogenesis	PF00828	Ribosomal_L27A	Ribosomal proteins 50S-L15, 50S-L18e, 60S-L27A
P14131	Rps16	20055	40S ribosomal protein S16	GO:0005829,GO:0022626,GO:0022627,GO:0015935,GO:0003723,GO:0003735,GO:1990830,GO:0097421,GO:0000462,GO:0042274,GO:0006364,GO:0006412	cytosol|cytosolic ribosome|cytosolic small ribosomal subunit|small ribosomal subunit|RNA binding|structural constituent of ribosome|cellular response to leukemia inhibitory factor|liver regeneration|maturation of SSU-rRNA from tricistronic rRNA transcript (SSU-rRNA, 5.8S rRNA, LSU-rRNA)|ribosomal small subunit biogenesis|rRNA processing|translation	mmu03010,mmu05171	Ribosome|Coronavirus disease - COVID-19	KOG1753	[J]	40S ribosomal protein S16	Translation, ribosomal structure and biogenesis	KOG1753	J	structural constituent of ribosome	Translation, ribosomal structure and biogenesis	PF00380	Ribosomal_S9	Ribosomal protein S9/S16
P14148	Rpl7	19989	60S ribosomal protein L7	GO:0031672,GO:0005829,GO:0022625,GO:0022626,GO:0005844,GO:0014069,GO:1990904,GO:0005840,GO:0045202,GO:0008097,GO:0003677,GO:0042802,GO:0003729,GO:0003723,GO:0003735,GO:0000463,GO:0042273,GO:0006364,GO:0006412	A band|cytosol|cytosolic large ribosomal subunit|cytosolic ribosome|polysome|postsynaptic density|ribonucleoprotein complex|ribosome|synapse|5S rRNA binding|DNA binding|identical protein binding|mRNA binding|RNA binding|structural constituent of ribosome|maturation of LSU-rRNA from tricistronic rRNA transcript (SSU-rRNA, 5.8S rRNA, LSU-rRNA)|ribosomal large subunit biogenesis|rRNA processing|tran…	mmu03010,mmu05171	Ribosome|Coronavirus disease - COVID-19	KOG3184	[J]	60S ribosomal protein L7	Translation, ribosomal structure and biogenesis	KOG3184	J	maturation of LSU-rRNA from tricistronic rRNA transcript (SSU-rRNA, 5.8S rRNA, LSU-rRNA)	Translation, ribosomal structure and biogenesis	PF00327	Ribosomal_L30	Ribosomal protein L30p/L7e
P14152	Mdh1	17449	Malate dehydrogenase, cytoplasmic	GO:0005813,GO:0005829,GO:0005739,GO:0043209,GO:0030060,GO:0016615,GO:0051287,GO:0005975,GO:0006108,GO:0019674,GO:0006734,GO:0006107,GO:0006099	centrosome|cytosol|mitochondrion|myelin sheath|L-malate dehydrogenase activity|malate dehydrogenase activity|NAD binding|carbohydrate metabolic process|malate metabolic process|NAD metabolic process|NADH metabolic process|oxaloacetate metabolic process|tricarboxylic acid cycle	mmu00020,mmu00620,mmu00630,mmu00270,mmu04964	Citrate cycle (TCA cycle)|Pyruvate metabolism|Glyoxylate and dicarboxylate metabolism|Cysteine and methionine metabolism|Proximal tubule bicarbonate reclamation	KOG1496	[C]	Malate dehydrogenase	Energy production and conversion	KOG1496	C	malate metabolic process	Energy production and conversion	PF00056	Ldh_1_N	lactate/malate dehydrogenase, NAD binding domain
P14206	Rpsa	16785	40S ribosomal protein SA	GO:0005604,GO:0062023,GO:0005737,GO:0005829,GO:0022626,GO:0022627,GO:0098978,GO:0016020,GO:0043025,GO:0005634,GO:0005886,GO:0015935,GO:0045202,GO:0043236,GO:0005055,GO:0043022,GO:0003735,GO:0098609,GO:0002181,GO:0030855,GO:0000028,GO:0006412	basement membrane|collagen-containing extracellular matrix|cytoplasm|cytosol|cytosolic ribosome|cytosolic small ribosomal subunit|glutamatergic synapse|membrane|neuronal cell body|nucleus|plasma membrane|small ribosomal subunit|synapse|laminin binding|laminin receptor activity|ribosome binding|structural constituent of ribosome|cell-cell adhesion|cytoplasmic translation|epithelial cell differenti…	mmu03010,mmu05171	Ribosome|Coronavirus disease - COVID-19	KOG0830	[J]	40S ribosomal protein SA (P40)/Laminin receptor 1	Translation, ribosomal structure and biogenesis	KOG0830	J	structural constituent of ribosome	Translation, ribosomal structure and biogenesis	PF00318	Ribosomal_S2	Ribosomal protein S2
P14211	Calr	12317	Calreticulin	GO:0001669,GO:0009986,GO:0062023,GO:0060473,GO:0005737,GO:0005829,GO:0005783,GO:0005788,GO:0005789,GO:0044322,GO:0009897,GO:0005576,GO:0005615,GO:0005794,GO:0043231,GO:0005764,GO:0016020,GO:0042824,GO:0005635,GO:0005634,GO:0048471,GO:0045335,GO:0005844,GO:0032991,GO:0016529,GO:0033018,GO:0005790,GO:0050681,GO:0005509,GO:0030246,GO:0042562,GO:0005178,GO:0005506,GO:0003729,GO:0042277,GO:0031625,GO:…	acrosomal vesicle|cell surface|collagen-containing extracellular matrix|cortical granule|cytoplasm|cytosol|endoplasmic reticulum|endoplasmic reticulum lumen|endoplasmic reticulum membrane|endoplasmic reticulum quality control compartment|external side of plasma membrane|extracellular region|extracellular space|Golgi apparatus|intracellular membrane-bounded organelle|lysosome|membrane|MHC class I …	mmu04141,mmu04145,mmu04612,mmu05166,mmu05170,mmu05168,mmu05163,mmu05169,mmu05142	Protein processing in endoplasmic reticulum|Phagosome|Antigen processing and presentation|Human T-cell leukemia virus 1 infection|Human immunodeficiency virus 1 infection|Herpes simplex virus 1 infection|Human cytomegalovirus infection|Epstein-Barr virus infection|Chagas disease	KOG0674	[O]	Calreticulin	Posttranslational modification, protein turnover, chaperones	KOG0674	O	unfolded protein binding	Posttranslational modification, protein turnover, chaperones	PF00262	Calreticulin	Calreticulin family
P14576	Srp54	665155	Signal recognition particle 54 kDa protein	GO:0005737,GO:0005829,GO:0005783,GO:0016607,GO:0005634,GO:0005786,GO:0008312,GO:0030942,GO:0019003,GO:0005525,GO:0003924,GO:0043021,GO:0031017,GO:0030851,GO:0030593,GO:0006614,GO:0006616	cytoplasm|cytosol|endoplasmic reticulum|nuclear speck|nucleus|signal recognition particle, endoplasmic reticulum targeting|7S RNA binding|endoplasmic reticulum signal peptide binding|GDP binding|GTP binding|GTPase activity|ribonucleoprotein complex binding|exocrine pancreas development|granulocyte differentiation|neutrophil chemotaxis|SRP-dependent cotranslational protein targeting to membrane|SR…	mmu03060	Protein export	KOG0780	[U]	Signal recognition particle, subunit Srp54	Intracellular trafficking, secretion, and vesicular transport	KOG0780	U	7S RNA binding	Intracellular trafficking, secretion, and vesicular transport	PF00448	SRP54	SRP54-type protein, GTPase domain
P14685	Psmd3	22123	26S proteasome non-ATPase regulatory subunit 3	GO:0022624,GO:0000502,GO:0005838,GO:0008541,GO:0030234,GO:0042176,GO:0006511	proteasome accessory complex|proteasome complex|proteasome regulatory particle|proteasome regulatory particle, lid subcomplex|enzyme regulator activity|regulation of protein catabolic process|ubiquitin-dependent protein catabolic process	mmu03050,mmu05169,mmu05010,mmu05012,mmu05014,mmu05016,mmu05017,mmu05020,mmu05022	Proteasome|Epstein-Barr virus infection|Alzheimer disease|Parkinson disease|Amyotrophic lateral sclerosis|Huntington disease|Spinocerebellar ataxia|Prion disease|Pathways of neurodegeneration - multiple diseases	KOG2581	[O]	26S proteasome regulatory complex, subunit RPN3/PSMD3	Posttranslational modification, protein turnover, chaperones	KOG2581	O	regulation of protein catabolic process	Posttranslational modification, protein turnover, chaperones	PF01399	PCI	PCI domain
P14719	Il1rl1	17082	Interleukin-1 receptor-like 1	GO:0009986,GO:0005829,GO:0009897,GO:0005615,GO:0005925,GO:0016021,GO:0005886,GO:0004908,GO:0002113,GO:0002114,GO:0050135,GO:0061809,GO:0008285,GO:0032689,GO:0002826,GO:0032722,GO:0050729,GO:0032754,GO:0043032	cell surface|cytosol|external side of plasma membrane|extracellular space|focal adhesion|integral component of membrane|plasma membrane|interleukin-1 receptor activity|interleukin-33 binding|interleukin-33 receptor activity|NAD(P)+ nucleosidase activity|NAD+ nucleotidase, cyclic ADP-ribose generating|negative regulation of cell population proliferation|negative regulation of interferon-gamma prod…	mmu04060	Cytokine-cytokine receptor interaction					ENOG502RU6H	S	interleukin-33 binding	Function unknown	PF01582	TIR	TIR domain
P14733	Lmnb1	16906	Lamin-B1	GO:0005737,GO:0005638,GO:0005635,GO:0005637,GO:0005652,GO:0016363,GO:0031965,GO:0005654,GO:0005634,GO:0003690,GO:0008432,GO:0043274,GO:1990837,GO:1904609,GO:0010971,GO:0046330	cytoplasm|lamin filament|nuclear envelope|nuclear inner membrane|nuclear lamina|nuclear matrix|nuclear membrane|nucleoplasm|nucleus|double-stranded DNA binding|JUN kinase binding|phospholipase binding|sequence-specific double-stranded DNA binding|cellular response to monosodium L-glutamate|positive regulation of G2/M transition of mitotic cell cycle|positive regulation of JNK cascade	mmu04210	Apoptosis	KOG0977	[DY]	Nuclear envelope protein lamin, intermediate filament superfamily	Cell cycle control, cell division, chromosome partitioning |Nuclear structure	KOG0977	S	intermediate filament organization	Function unknown	PF00038	Filament	Intermediate filament protein
P14824	Anxa6	11749	Annexin A6	GO:0016324,GO:0062023,GO:0005737,GO:0005829,GO:0005925,GO:0014704,GO:0031902,GO:0005765,GO:0042470,GO:0016020,GO:0005739,GO:0005634,GO:0048471,GO:0032991,GO:0042383,GO:0051015,GO:0005262,GO:0005509,GO:0005544,GO:0048306,GO:0015485,GO:0035374,GO:0005525,GO:0042802,GO:0015276,GO:0008289,GO:0001786,GO:0044877,GO:0097190,GO:0006816,GO:0003418,GO:0034220,GO:0051560,GO:0051283,GO:0001755,GO:0001778,GO:…	apical plasma membrane|collagen-containing extracellular matrix|cytoplasm|cytosol|focal adhesion|intercalated disc|late endosome membrane|lysosomal membrane|melanosome|membrane|mitochondrion|nucleus|perinuclear region of cytoplasm|protein-containing complex|sarcolemma|actin filament binding|calcium channel activity|calcium ion binding|calcium-dependent phospholipid binding|calcium-dependent prote…			KOG0819	[U]	Annexin	Intracellular trafficking, secretion, and vesicular transport	KOG0819	L	calcium-dependent phospholipid binding	Replication, recombination and repair	PF00191	Annexin	Annexin
P14869	Rplp0	11837	60S acidic ribosomal protein P0	GO:0005737,GO:0036464,GO:0005829,GO:0022625,GO:0022626,GO:0030425,GO:0005783,GO:0016020,GO:0005634,GO:0098794,GO:0014069,GO:1990904,GO:0045202,GO:0070180,GO:0042277,GO:0003735,GO:0071353,GO:0002181,GO:0000027	cytoplasm|cytoplasmic ribonucleoprotein granule|cytosol|cytosolic large ribosomal subunit|cytosolic ribosome|dendrite|endoplasmic reticulum|membrane|nucleus|postsynapse|postsynaptic density|ribonucleoprotein complex|synapse|large ribosomal subunit rRNA binding|peptide binding|structural constituent of ribosome|cellular response to interleukin-4|cytoplasmic translation|ribosomal large subunit asse…	mmu03010,mmu05171	Ribosome|Coronavirus disease - COVID-19	KOG0815	[J]	60S acidic ribosomal protein P0	Translation, ribosomal structure and biogenesis	KOG0815	J	ribosome biogenesis	Translation, ribosomal structure and biogenesis	PF00428	Ribosomal_60s	60s Acidic ribosomal protein
P14873	Map1b	17755	Microtubule-associated protein 1B	GO:0097440,GO:0030424,GO:0097441,GO:0005856,GO:0005829,GO:0030425,GO:0043197,GO:0030426,GO:0097457,GO:0005874,GO:0005875,GO:0043025,GO:0043204,GO:0048471,GO:0001750,GO:0005886,GO:0014069,GO:0036477,GO:0045202,GO:0043196,GO:0003779,GO:0005519,GO:0008017,GO:0005543,GO:0044877,GO:0048675,GO:0007409,GO:0009987,GO:0071363,GO:0071375,GO:0016358,GO:0021700,GO:0061162,GO:0051915,GO:0001578,GO:0000226,GO:…	apical dendrite|axon|basal dendrite|cytoskeleton|cytosol|dendrite|dendritic spine|growth cone|hippocampal mossy fiber|microtubule|microtubule associated complex|neuronal cell body|perikaryon|perinuclear region of cytoplasm|photoreceptor outer segment|plasma membrane|postsynaptic density|somatodendritic compartment|synapse|varicosity|actin binding|cytoskeletal regulatory protein binding|microtubul…			KOG3592	[Z]	Microtubule-associated proteins	Cytoskeleton	KOG3592	G	microtubule binding	Carbohydrate transport and metabolism	PF00414	MAP1B_neuraxin	Neuraxin and MAP1B repeat
P15379	Cd44	12505	CD44 antigen	GO:0016324,GO:0016323,GO:0042995,GO:0009986,GO:0005829,GO:0009897,GO:0005794,GO:0016021,GO:0031258,GO:0035692,GO:0005902,GO:0005634,GO:0005886,GO:0032991,GO:0005154,GO:0005540,GO:0051219,GO:0019901,GO:0004888,GO:0005114,GO:0060442,GO:0001658,GO:0007155,GO:0016477,GO:0044344,GO:0019221,GO:0030214,GO:0006954,GO:0034238,GO:0070487,GO:0043066,GO:2000562,GO:0043154,GO:0043518,GO:0050728,GO:1902166,GO:…	apical plasma membrane|basolateral plasma membrane|cell projection|cell surface|cytosol|external side of plasma membrane|Golgi apparatus|integral component of membrane|lamellipodium membrane|macrophage migration inhibitory factor receptor complex|microvillus|nucleus|plasma membrane|protein-containing complex|epidermal growth factor receptor binding|hyaluronic acid binding|phosphoprotein binding|p…	mmu04512,mmu04640,mmu05206,mmu05205,mmu05169	ECM-receptor interaction|Hematopoietic cell lineage|MicroRNAs in cancer|Proteoglycans in cancer|Epstein-Barr virus infection					ENOG502RX7Q	S	macrophage fusion	Function unknown	PF00193	Xlink	Extracellular link domain
P15532	Nme1	18102	Nucleoside diphosphate kinase A	GO:0005813,GO:0005829,GO:0005882,GO:0016020,GO:0005741,GO:0005739,GO:0043209,GO:0005634,GO:0048471,GO:0032587,GO:0005524,GO:0004536,GO:0019899,GO:0043015,GO:0005525,GO:0042802,GO:0019215,GO:0000287,GO:0004550,GO:0019901,GO:0043024,GO:0000977,GO:0003697,GO:0030154,GO:0035690,GO:0071398,GO:0071333,GO:0006241,GO:0006897,GO:0006183,GO:0021766,GO:0007595,GO:0030879,GO:0010629,GO:0002762,GO:0006165,GO:…	centrosome|cytosol|intermediate filament|membrane|mitochondrial outer membrane|mitochondrion|myelin sheath|nucleus|perinuclear region of cytoplasm|ruffle membrane|ATP binding|deoxyribonuclease activity|enzyme binding|gamma-tubulin binding|GTP binding|identical protein binding|intermediate filament binding|magnesium ion binding|nucleoside diphosphate kinase activity|protein kinase binding|ribosoma…	mmu00230,mmu00240,mmu00983	Purine metabolism|Pyrimidine metabolism|Drug metabolism - other enzymes	KOG0888	[F]	Nucleoside diphosphate kinase	Nucleotide transport and metabolism	KOG0888	F	Nucleoside diphosphate kinase	Nucleotide transport and metabolism	PF00334	NDK	Nucleoside diphosphate kinase
P15626	Gstm2	14863	Glutathione S-transferase Mu 2	GO:0005737,GO:0005829,GO:0045171,GO:0005886,GO:0032991,GO:0019899,GO:0043295,GO:0004364,GO:0042802,GO:0042803,GO:0070458,GO:1901687,GO:0006749,GO:0051122,GO:0018916,GO:0006693,GO:0042178	cytoplasm|cytosol|intercellular bridge|plasma membrane|protein-containing complex|enzyme binding|glutathione binding|glutathione transferase activity|identical protein binding|protein homodimerization activity|cellular detoxification of nitrogen compound|glutathione derivative biosynthetic process|glutathione metabolic process|hepoxilin biosynthetic process|nitrobenzene metabolic process|prostagl…	mmu00480,mmu00980,mmu00982,mmu00983,mmu05200,mmu05204,mmu05207,mmu05208,mmu05225,mmu05418,mmu01524	Glutathione metabolism|Metabolism of xenobiotics by cytochrome P450|Drug metabolism - cytochrome P450|Drug metabolism - other enzymes|Pathways in cancer|Chemical carcinogenesis - DNA adducts|Chemical carcinogenesis - receptor activation|Chemical carcinogenesis - reactive oxygen species|Hepatocellular carcinoma|Fluid shear stress and atherosclerosis|Platinum drug resistance	KOG1695	[O]	Glutathione S-transferase	Posttranslational modification, protein turnover, chaperones	KOG1695	O	glutathione transferase activity	Posttranslational modification, protein turnover, chaperones	PF00043	GST_C	Glutathione S-transferase, C-terminal domain
P15806	Tcf3	21423	Transcription factor E2-alpha	GO:0000785,GO:0005737,GO:0005829,GO:0000791,GO:0005654,GO:0000786,GO:0005634,GO:0032991,GO:0090575,GO:0005667,GO:0043425,GO:0003682,GO:0000987,GO:0003677,GO:0001228,GO:0003700,GO:0000981,GO:0140297,GO:0001227,GO:0070888,GO:0042802,GO:0031435,GO:0030165,GO:0046982,GO:0042803,GO:0000978,GO:0061629,GO:0043565,GO:0008134,GO:0030297,GO:0070644,GO:0002326,GO:0048468,GO:0030218,GO:0007369,GO:0043966,GO:…	chromatin|cytoplasm|cytosol|euchromatin|nucleoplasm|nucleosome|nucleus|protein-containing complex|RNA polymerase II transcription regulator complex|transcription regulator complex|bHLH transcription factor binding|chromatin binding|cis-regulatory region sequence-specific DNA binding|DNA binding|DNA-binding transcription activator activity, RNA polymerase II-specific|DNA-binding transcription fact…	mmu04550,mmu05202,mmu05166	Signaling pathways regulating pluripotency of stem cells|Transcriptional misregulation in cancer|Human T-cell leukemia virus 1 infection	KOG3910	[K]	Helix loop helix transcription factor	Transcription	KOG3910	K	bHLH transcription factor binding	Transcription	PF00010	HLH	Helix-loop-helix DNA-binding domain
P15864	H1-2	50708	Histone H1.2	GO:0000791,GO:0000786,GO:0005634,GO:0035327,GO:0031490,GO:0003677,GO:0003690,GO:0031492,GO:0030261,GO:0098532,GO:0080182,GO:0031936,GO:0045910,GO:0000122,GO:0006334,GO:0016584,GO:0006357	euchromatin|nucleosome|nucleus|transcriptionally active chromatin|chromatin DNA binding|DNA binding|double-stranded DNA binding|nucleosomal DNA binding|chromosome condensation|histone H3-K27 trimethylation|histone H3-K4 trimethylation|negative regulation of chromatin silencing|negative regulation of DNA recombination|negative regulation of transcription by RNA polymerase II|nucleosome assembly|nu…			KOG4012	[B]	Histone H1	Chromatin structure and dynamics	KOG4012	B	nucleosome assembly	Chromatin structure and dynamics	PF00538	Linker_histone	linker histone H1 and H5 family
P16045	Lgals1	16852	Galectin-1	GO:0009986,GO:0062023,GO:0005737,GO:0005829,GO:0005576,GO:0005615,GO:0005634,GO:0030246,GO:0005534,GO:0042802,GO:0030395,GO:0043236,GO:0006915,GO:0071333,GO:0071407,GO:0007157,GO:0045445,GO:0010812,GO:0010977,GO:0002317,GO:0034120,GO:0046598,GO:0048678,GO:0042493,GO:0035900,GO:0031295	cell surface|collagen-containing extracellular matrix|cytoplasm|cytosol|extracellular region|extracellular space|nucleus|carbohydrate binding|galactose binding|identical protein binding|lactose binding|laminin binding|apoptotic process|cellular response to glucose stimulus|cellular response to organic cyclic compound|heterophilic cell-cell adhesion via plasma membrane cell adhesion molecules|myob…			KOG3587	[W]	Galectin, galactose-binding lectin	Extracellular structures	KOG3587	K	carbohydrate binding	Transcription	PF00337	Gal-bind_lectin	Galactoside-binding lectin
P16110	Lgals3	16854	Galectin-3	GO:0009986,GO:0062023,GO:0005737,GO:0009897,GO:0031012,GO:0005576,GO:0005615,GO:0097386,GO:0001772,GO:0005743,GO:0005634,GO:0005681,GO:0050785,GO:0042056,GO:0048030,GO:0034988,GO:0019863,GO:0043236,GO:0048029,GO:0070492,GO:0019903,GO:0061844,GO:0030154,GO:0048245,GO:0030198,GO:0045087,GO:0031640,GO:0048246,GO:0002548,GO:0071674,GO:0006397,GO:0043066,GO:1903769,GO:0045806,GO:2001237,GO:2000521,GO:…	cell surface|collagen-containing extracellular matrix|cytoplasm|external side of plasma membrane|extracellular matrix|extracellular region|extracellular space|glial cell projection|immunological synapse|mitochondrial inner membrane|nucleus|spliceosomal complex|advanced glycation end-product receptor activity|chemoattractant activity|disaccharide binding|Fc-gamma receptor I complex binding|IgE bin…			KOG3587	[W]	Galectin, galactose-binding lectin	Extracellular structures	KOG3587	S	carbohydrate binding	Function unknown	PF00337	Gal-bind_lectin	Galactoside-binding lectin
P16125	Ldhb	16832	L-lactate dehydrogenase B chain	GO:0005829,GO:0045121,GO:0005743,GO:0005739,GO:0043209,GO:0042802,GO:0019900,GO:0004459,GO:0004457,GO:0051287,GO:0005975,GO:0019244,GO:0006089,GO:0019674	cytosol|membrane raft|mitochondrial inner membrane|mitochondrion|myelin sheath|identical protein binding|kinase binding|L-lactate dehydrogenase activity|lactate dehydrogenase activity|NAD binding|carbohydrate metabolic process|lactate biosynthetic process from pyruvate|lactate metabolic process|NAD metabolic process	mmu00010,mmu00620,mmu00640,mmu00270,mmu04066,mmu04922,mmu05230	Glycolysis / Gluconeogenesis|Pyruvate metabolism|Propanoate metabolism|Cysteine and methionine metabolism|HIF-1 signaling pathway|Glucagon signaling pathway|Central carbon metabolism in cancer	KOG1495	[C]	Lactate dehydrogenase	Energy production and conversion	KOG1495	C	belongs to the LDH MDH superfamily	Energy production and conversion	PF00056	Ldh_1_N	lactate/malate dehydrogenase, NAD binding domain
P16254	Srp14	20813	Signal recognition particle 14 kDa protein	GO:0005634,GO:0005786,GO:0008312,GO:0030942,GO:0045047,GO:0006614	nucleus|signal recognition particle, endoplasmic reticulum targeting|7S RNA binding|endoplasmic reticulum signal peptide binding|protein targeting to ER|SRP-dependent cotranslational protein targeting to membrane	mmu03060	Protein export	KOG1761	[U]	Signal recognition particle, subunit Srp14	Intracellular trafficking, secretion, and vesicular transport	KOG1761	S	endoplasmic reticulum signal peptide binding	Function unknown	PF02290	SRP14	Signal recognition particle 14kD protein
P16546	Sptan1	20740	Spectrin alpha chain, non-erythrocytic 1	GO:0030863,GO:0032437,GO:0005829,GO:0005916,GO:0043231,GO:0016328,GO:0016020,GO:0015630,GO:0043209,GO:0033270,GO:0005886,GO:0032991,GO:0030018,GO:0003779,GO:0005509,GO:0005516,GO:0044877,GO:0030507,GO:0019905,GO:0031532,GO:0051693	cortical cytoskeleton|cuticular plate|cytosol|fascia adherens|intracellular membrane-bounded organelle|lateral plasma membrane|membrane|microtubule cytoskeleton|myelin sheath|paranode region of axon|plasma membrane|protein-containing complex|Z disc|actin binding|calcium ion binding|calmodulin binding|protein-containing complex binding|spectrin binding|syntaxin binding|actin cytoskeleton reorganiz…	mmu04210	Apoptosis	KOG0040	[Z]	Ca2+-binding actin-bundling protein (spectrin), alpha chain (EF-Hand protein superfamily)	Cytoskeleton	KOG0040	Z	negative regulation of protein depolymerization	Cytoskeleton	PF00018	SH3_1	SH3 domain
P16675	Ctsa	19025	Lysosomal protective protein	GO:0043231,GO:0005765,GO:0005739,GO:0004185,GO:1904715,GO:0006508,GO:0031647	intracellular membrane-bounded organelle|lysosomal membrane|mitochondrion|serine-type carboxypeptidase activity|negative regulation of chaperone-mediated autophagy|proteolysis|regulation of protein stability	mmu04142,mmu04614	Lysosome|Renin-angiotensin system	KOG1282	[OE]	Serine carboxypeptidases (lysosomal cathepsin A)	Posttranslational modification, protein turnover, chaperones |Amino acid transport and metabolism	KOG1282	E	serine-type carboxypeptidase activity	Amino acid transport and metabolism	PF00450	Peptidase_S10	Serine carboxypeptidase
P16858	Gapdh	14433	Glyceraldehyde-3-phosphate dehydrogenase	GO:0005737,GO:0005829,GO:0097452,GO:0098978,GO:0043231,GO:0031906,GO:0005811,GO:0015630,GO:0005739,GO:0043209,GO:0031965,GO:0005634,GO:0005886,GO:0099092,GO:1990904,GO:0019828,GO:0097718,GO:0019899,GO:0004365,GO:0042802,GO:0008017,GO:0051287,GO:0050661,GO:0035605,GO:0061844,GO:0006915,GO:0019933,GO:0005975,GO:0071346,GO:0050832,GO:0006094,GO:0006096,GO:0051873,GO:0031640,GO:0000226,GO:0010951,GO:…	cytoplasm|cytosol|GAIT complex|glutamatergic synapse|intracellular membrane-bounded organelle|late endosome lumen|lipid droplet|microtubule cytoskeleton|mitochondrion|myelin sheath|nuclear membrane|nucleus|plasma membrane|postsynaptic density, intracellular component|ribonucleoprotein complex|aspartic-type endopeptidase inhibitor activity|disordered domain specific binding|enzyme binding|glyceral…	mmu00010,mmu04066,mmu05132,mmu05010,mmu05415	Glycolysis / Gluconeogenesis|HIF-1 signaling pathway|Salmonella infection|Alzheimer disease|Diabetic cardiomyopathy	KOG0657	[G]	Glyceraldehyde 3-phosphate dehydrogenase	Carbohydrate transport and metabolism	KOG0657	G	glyceraldehyde-3-phosphate dehydrogenase (NAD(P)+) (phosphorylating) activity	Carbohydrate transport and metabolism	PF00044	Gp_dh_N	Glyceraldehyde 3-phosphate dehydrogenase, NAD binding domain
P17047	Lamp2	16784	Lysosome-associated membrane glycoprotein 2	GO:0044754,GO:0061742,GO:0005768,GO:0070062,GO:0005615,GO:0097637,GO:0005770,GO:0031902,GO:1990836,GO:0005765,GO:0005764,GO:0016020,GO:0048471,GO:0030670,GO:0005886,GO:0031088,GO:0005802,GO:0019899,GO:0019904,GO:0097352,GO:0006914,GO:0009267,GO:0061684,GO:0072594,GO:1905146,GO:0046716,GO:0031333,GO:0050821,GO:0006605,GO:0061740,GO:0031647	autolysosome|chaperone-mediated autophagy translocation complex|endosome|extracellular exosome|extracellular space|integral component of autophagosome membrane|late endosome|late endosome membrane|lysosomal matrix|lysosomal membrane|lysosome|membrane|perinuclear region of cytoplasm|phagocytic vesicle membrane|plasma membrane|platelet dense granule membrane|trans-Golgi network|enzyme binding|prote…	mmu04145,mmu04142,mmu04140,mmu05152	Phagosome|Lysosome|Autophagy - animal|Tuberculosis	KOG4818	[R]	Lysosomal-associated membrane protein	General function prediction only	KOG4818	S	protein targeting to lysosome involved in chaperone-mediated autophagy	Function unknown	PF01299	Lamp	Lysosome-associated membrane glycoprotein (Lamp)
P17095	Hmga1	15361	High mobility group protein HMG-I/HMG-Y	GO:0005634,GO:0090575,GO:0035985,GO:0051575,GO:0003682,GO:0000987,GO:0003677,GO:0003906,GO:0019899,GO:0003680,GO:0030374,GO:0042975,GO:0042974,GO:0046965,GO:0030527,GO:0003713,GO:0003712,GO:0008134,GO:0008285,GO:0045892,GO:0090402,GO:2000774,GO:0045944,GO:0045893,GO:0006355,GO:0035986,GO:0007283	nucleus|RNA polymerase II transcription regulator complex|senescence-associated heterochromatin focus|5'-deoxyribose-5-phosphate lyase activity|chromatin binding|cis-regulatory region sequence-specific DNA binding|DNA binding|DNA-(apurinic or apyrimidinic site) endonuclease activity|enzyme binding|minor groove of adenine-thymine-rich DNA binding|nuclear receptor coactivator activity|peroxisome pr…							ENOG502S5JW	S	oncogene-induced cell senescence	Function unknown
P17182	Eno1	433182	Alpha-enolase	GO:0099738,GO:0009986,GO:0005737,GO:0005829,GO:0019897,GO:0030426,GO:0016020,GO:0045121,GO:0043209,GO:0043005,GO:0000015,GO:0005886,GO:0097060,GO:0001227,GO:0019899,GO:0051020,GO:0031072,GO:0042802,GO:0000287,GO:0004634,GO:0042803,GO:0044877,GO:0003723,GO:0000977,GO:0061621,GO:0098761,GO:0006096,GO:0001701,GO:0051099,GO:0032889	cell cortex region|cell surface|cytoplasm|cytosol|extrinsic component of plasma membrane|growth cone|membrane|membrane raft|myelin sheath|neuron projection|phosphopyruvate hydratase complex|plasma membrane|synaptic membrane|DNA-binding transcription repressor activity, RNA polymerase II-specific|enzyme binding|GTPase binding|heat shock protein binding|identical protein binding|magnesium ion bindi…	mmu00010,mmu03018,mmu04066	Glycolysis / Gluconeogenesis|RNA degradation|HIF-1 signaling pathway	KOG2670	[G]	Enolase	Carbohydrate transport and metabolism	KOG2670	G	phosphopyruvate hydratase activity	Carbohydrate transport and metabolism	PF00113	Enolase_C	Enolase, C-terminal TIM barrel domain
P17225	Ptbp1	19205	Polypyrimidine tract-binding protein 1	GO:0005737,GO:0044306,GO:0005634,GO:0003729,GO:0036002,GO:0001069,GO:0043565,GO:0003697,GO:0000014,GO:0070935,GO:0010467,GO:0075522,GO:0006397,GO:0048025,GO:0051148,GO:0045665,GO:0033119,GO:0022008,GO:0000956,GO:0070886,GO:0032024,GO:0010976,GO:0035307,GO:1904411,GO:0045944,GO:0045727,GO:0000381,GO:0045595,GO:0043484,GO:0008380	cytoplasm|neuron projection terminus|nucleus|mRNA binding|pre-mRNA binding|regulatory region RNA binding|sequence-specific DNA binding|single-stranded DNA binding|single-stranded DNA endodeoxyribonuclease activity|3'-UTR-mediated mRNA stabilization|gene expression|IRES-dependent viral translational initiation|mRNA processing|negative regulation of mRNA splicing, via spliceosome|negative regulatio…			KOG1190	[A]	Polypyrimidine tract-binding protein	RNA processing and modification	KOG1190	S	regulation of secretory granule organization	Function unknown	PF00076	RRM_1	RNA recognition motif. (a.k.a. RRM, RBD, or RNP domain)
P17427	Ap2a2	11772	AP-2 complex subunit alpha-2	GO:0030122,GO:0031410,GO:0030117,GO:0030141,GO:0008021,GO:0140312,GO:0035615,GO:0097718,GO:0019900,GO:0035091,GO:0019904,GO:0019901,GO:0044877,GO:0072583,GO:0006886,GO:0006898,GO:1902036,GO:0016192	AP-2 adaptor complex|cytoplasmic vesicle|membrane coat|secretory granule|synaptic vesicle|cargo adaptor activity|clathrin adaptor activity|disordered domain specific binding|kinase binding|phosphatidylinositol binding|protein domain specific binding|protein kinase binding|protein-containing complex binding|clathrin-dependent endocytosis|intracellular protein transport|receptor-mediated endocytosi…	mmu04144,mmu04961,mmu04721,mmu05016	Endocytosis|Endocrine and other factor-regulated calcium reabsorption|Synaptic vesicle cycle|Huntington disease	KOG1077	[U]	Vesicle coat complex AP-2, alpha subunit	Intracellular trafficking, secretion, and vesicular transport	KOG1077	U	clathrin adaptor activity	Intracellular trafficking, secretion, and vesicular transport	PF01602	Adaptin_N	Adaptin N terminal region
P17665	Cox7c	12867	Cytochrome c oxidase subunit 7C, mitochondrial	GO:0016021,GO:0005743,GO:0005751,GO:0005739,GO:0006123	integral component of membrane|mitochondrial inner membrane|mitochondrial respiratory chain complex IV|mitochondrion|mitochondrial electron transport, cytochrome c to oxygen	mmu00190,mmu04260,mmu04714,mmu05208,mmu05010,mmu05012,mmu05014,mmu05016,mmu05020,mmu05022,mmu05415,mmu04932	Oxidative phosphorylation|Cardiac muscle contraction|Thermogenesis|Chemical carcinogenesis - reactive oxygen species|Alzheimer disease|Parkinson disease|Amyotrophic lateral sclerosis|Huntington disease|Prion disease|Pathways of neurodegeneration - multiple diseases|Diabetic cardiomyopathy|Non-alcoholic fatty liver disease	KOG4527	[C]	Cytochrome c oxidase, subunit VIIc/COX8	Energy production and conversion	KOG4527	S	Cytochrome c oxidase subunit	Function unknown	PF02935	COX7C	Cytochrome c oxidase subunit VIIc
P17710	Hk1	15275	Hexokinase-1	GO:0005901,GO:0005829,GO:0045121,GO:0005741,GO:0005739,GO:0032991,GO:0005524,GO:0008865,GO:0004340,GO:0047931,GO:0005536,GO:0004396,GO:0042802,GO:0019158,GO:0042834,GO:0004672,GO:0044877,GO:0046835,GO:0001678,GO:0072655,GO:0006002,GO:0051156,GO:0006096,GO:0006954,GO:0045087,GO:0072656,GO:0006013,GO:0043066,GO:0018105,GO:0018107,GO:0018108,GO:0002720,GO:0032731,GO:0046777,GO:0006468,GO:0010359,GO:…	caveola|cytosol|membrane raft|mitochondrial outer membrane|mitochondrion|protein-containing complex|ATP binding|fructokinase activity|glucokinase activity|glucosamine kinase activity|glucose binding|hexokinase activity|identical protein binding|mannokinase activity|peptidoglycan binding|protein kinase activity|protein-containing complex binding|carbohydrate phosphorylation|cellular glucose homeos…	mmu00010,mmu00051,mmu00052,mmu00500,mmu00520,mmu00524,mmu04066,mmu04910,mmu04973,mmu05230,mmu04930	Glycolysis / Gluconeogenesis|Fructose and mannose metabolism|Galactose metabolism|Starch and sucrose metabolism|Amino sugar and nucleotide sugar metabolism|Neomycin, kanamycin and gentamicin biosynthesis|HIF-1 signaling pathway|Insulin signaling pathway|Carbohydrate digestion and absorption|Central carbon metabolism in cancer|Type II diabetes mellitus	KOG1369	[G]	Hexokinase	Carbohydrate transport and metabolism	KOG1369	G	glucose binding	Carbohydrate transport and metabolism	PF00349	Hexokinase_1	Hexokinase
P17742	Ppia	268373	Peptidyl-prolyl cis-trans isomerase A	GO:0005737,GO:0005829,GO:0005576,GO:0005615,GO:0043231,GO:0043209,GO:0005634,GO:0032991,GO:0016018,GO:1904399,GO:0005178,GO:0003755,GO:0000187,GO:0032148,GO:0006915,GO:0060352,GO:0034599,GO:0042118,GO:0030595,GO:0034389,GO:1902176,GO:0061944,GO:0006469,GO:0001933,GO:0032873,GO:1903901,GO:0030182,GO:0030593,GO:0030168,GO:0070527,GO:0051092,GO:0035307,GO:0001934,GO:0050714,GO:0045070,GO:0006457,GO:…	cytoplasm|cytosol|extracellular region|extracellular space|intracellular membrane-bounded organelle|myelin sheath|nucleus|protein-containing complex|cyclosporin A binding|heparan sulfate binding|integrin binding|peptidyl-prolyl cis-trans isomerase activity|activation of MAPK activity|activation of protein kinase B activity|apoptotic process|cell adhesion molecule production|cellular response to o…	mmu04217	Necroptosis	KOG0865	[O]	Cyclophilin type peptidyl-prolyl cis-trans isomerase	Posttranslational modification, protein turnover, chaperones	KOG0865	O	peptidyl-prolyl cis-trans isomerase activity	Posttranslational modification, protein turnover, chaperones	PF00160	Pro_isomerase	Cyclophilin type peptidyl-prolyl cis-trans isomerase/CLD
P17751	Tpi1	21991	Triosephosphate isomerase	GO:0005829,GO:0016853,GO:0008929,GO:0042803,GO:0004807,GO:0031625,GO:0006094,GO:0006006,GO:0046166,GO:0019682,GO:0019563,GO:0006096,GO:0019242	cytosol|isomerase activity|methylglyoxal synthase activity|protein homodimerization activity|triose-phosphate isomerase activity|ubiquitin protein ligase binding|gluconeogenesis|glucose metabolic process|glyceraldehyde-3-phosphate biosynthetic process|glyceraldehyde-3-phosphate metabolic process|glycerol catabolic process|glycolytic process|methylglyoxal biosynthetic process	mmu00010,mmu00051,mmu00562	Glycolysis / Gluconeogenesis|Fructose and mannose metabolism|Inositol phosphate metabolism	KOG1643	[G]	Triosephosphate isomerase	Carbohydrate transport and metabolism	KOG1643	G	triosephosphate isomerase	Carbohydrate transport and metabolism	PF00121	TIM	Triosephosphate isomerase
P17809	Slc2a1	20525	Solute carrier family 2, facilitated glucose transporter member 1	GO:0016324,GO:0016323,GO:0005901,GO:0005911,GO:0030864,GO:0005737,GO:0005829,GO:0001939,GO:0005887,GO:0014704,GO:0016020,GO:0045121,GO:0030496,GO:0001917,GO:0005886,GO:0098793,GO:0042383,GO:0045202,GO:0031982,GO:0030018,GO:0055056,GO:0033300,GO:0005355,GO:0042802,GO:0019900,GO:0005324,GO:0043621,GO:0042910,GO:0071474,GO:0042149,GO:0071260,GO:0007417,GO:0021987,GO:0070837,GO:0007565,GO:0098708,GO:…	apical plasma membrane|basolateral plasma membrane|caveola|cell-cell junction|cortical actin cytoskeleton|cytoplasm|cytosol|female pronucleus|integral component of plasma membrane|intercalated disc|membrane|membrane raft|midbody|photoreceptor inner segment|plasma membrane|presynapse|sarcolemma|synapse|vesicle|Z disc|D-glucose transmembrane transporter activity|dehydroascorbic acid transmembrane t…	mmu04066,mmu04911,mmu04922,mmu04920,mmu04919,mmu04976,mmu05200,mmu05230,mmu05211,mmu05166,mmu05415,mmu04931	HIF-1 signaling pathway|Insulin secretion|Glucagon signaling pathway|Adipocytokine signaling pathway|Thyroid hormone signaling pathway|Bile secretion|Pathways in cancer|Central carbon metabolism in cancer|Renal cell carcinoma|Human T-cell leukemia virus 1 infection|Diabetic cardiomyopathy|Insulin resistance	KOG0569	[G]	Permease of the major facilitator superfamily	Carbohydrate transport and metabolism	KOG0569	U	transmembrane transporter activity	Intracellular trafficking, secretion, and vesicular transport	PF00083	Sugar_tr	Sugar (and other) transporter
P17879	Hspa1b	15511	Heat shock 70 kDa protein 1B	GO:0044297,GO:0005813,GO:0005737,GO:0005829,GO:0005759,GO:0005739,GO:0005634,GO:0005886,GO:0002199,GO:0005524,GO:0031072,GO:0051787,GO:0044183,GO:0031625,GO:0051082,GO:0007339,GO:0034620,GO:0051085,GO:0043066,GO:0043154,GO:0090063,GO:0032436,GO:0006457,GO:0042026,GO:1901673,GO:0009408,GO:0016192	cell body|centrosome|cytoplasm|cytosol|mitochondrial matrix|mitochondrion|nucleus|plasma membrane|zona pellucida receptor complex|ATP binding|heat shock protein binding|misfolded protein binding|protein folding chaperone|ubiquitin protein ligase binding|unfolded protein binding|binding of sperm to zona pellucida|cellular response to unfolded protein|chaperone cofactor-dependent protein refolding|…	mmu03040,mmu04141,mmu04010,mmu04144,mmu04612,mmu04915,mmu04213,mmu05162,mmu05134,mmu05145,mmu05020,mmu05417	Spliceosome|Protein processing in endoplasmic reticulum|MAPK signaling pathway|Endocytosis|Antigen processing and presentation|Estrogen signaling pathway|Longevity regulating pathway - multiple species|Measles|Legionellosis|Toxoplasmosis|Prion disease|Lipid and atherosclerosis	KOG0101	[O]	Molecular chaperones HSP70/HSC70, HSP70 superfamily	Posttranslational modification, protein turnover, chaperones	KOG0101	O	ATP binding	Posttranslational modification, protein turnover, chaperones	PF00012	HSP70	Hsp70 protein
P17897	Lyz1	17110	Lysozyme C-1	GO:0005737,GO:0005788,GO:0005615,GO:0000137,GO:0005795,GO:0005902,GO:0048237,GO:0030141,GO:0030140,GO:0016798,GO:0042802,GO:0003796,GO:0019835,GO:0050829,GO:0050830,GO:0008152	cytoplasm|endoplasmic reticulum lumen|extracellular space|Golgi cis cisterna|Golgi stack|microvillus|rough endoplasmic reticulum lumen|secretory granule|trans-Golgi network transport vesicle|hydrolase activity, acting on glycosyl bonds|identical protein binding|lysozyme activity|cytolysis|defense response to Gram-negative bacterium|defense response to Gram-positive bacterium|metabolic process	mmu04970	Salivary secretion					ENOG502S1S1	G	lysozyme activity	Carbohydrate transport and metabolism	PF00062	Lys	C-type lysozyme/alpha-lactalbumin family
P17918	Pcna	18538	Proliferating cell nuclear antigen	GO:0005813,GO:0000785,GO:0000307,GO:0016604,GO:0005652,GO:0043596,GO:0005654,GO:0005634,GO:0043626,GO:0070557,GO:0005657,GO:0003682,GO:0003684,GO:0032139,GO:0070182,GO:0030337,GO:0019899,GO:0030331,GO:0035035,GO:0042802,GO:0032405,GO:0008022,GO:0044877,GO:0000701,GO:0030971,GO:0006287,GO:0070301,GO:0034644,GO:0071466,GO:0030855,GO:0044849,GO:0007507,GO:0006272,GO:0097421,GO:0006298,GO:1902990,GO:…	centrosome|chromatin|cyclin-dependent protein kinase holoenzyme complex|nuclear body|nuclear lamina|nuclear replication fork|nucleoplasm|nucleus|PCNA complex|PCNA-p21 complex|replication fork|chromatin binding|damaged DNA binding|dinucleotide insertion or deletion binding|DNA polymerase binding|DNA polymerase processivity factor activity|enzyme binding|estrogen receptor binding|histone acetyltran…	mmu03030,mmu03410,mmu03420,mmu03430,mmu04110,mmu04530,mmu05161	DNA replication|Base excision repair|Nucleotide excision repair|Mismatch repair|Cell cycle|Tight junction|Hepatitis B	KOG1636	[L]	DNA polymerase delta processivity factor (proliferating cell nuclear antigen)	Replication, recombination and repair	KOG1636	L	DNA polymerase processivity factor activity	Replication, recombination and repair	PF00705	PCNA_N	Proliferating cell nuclear antigen, N-terminal domain
P18155	Mthfd2	17768	Bifunctional methylenetetrahydrofolate dehydrogenase/cyclohydrolase, mitochondrial	GO:0005739,GO:0000287,GO:0004477,GO:0004487,GO:0004488,GO:0042301,GO:0035999,GO:0046653	mitochondrion|magnesium ion binding|methenyltetrahydrofolate cyclohydrolase activity|methylenetetrahydrofolate dehydrogenase (NAD+) activity|methylenetetrahydrofolate dehydrogenase (NADP+) activity|phosphate ion binding|tetrahydrofolate interconversion|tetrahydrofolate metabolic process	mmu00670	One carbon pool by folate	KOG0089	[H]	Methylenetetrahydrofolate dehydrogenase/methylenetetrahydrofolate cyclohydrolase	Coenzyme transport and metabolism	KOG0089	H	methenyltetrahydrofolate cyclohydrolase activity	Coenzyme transport and metabolism	PF00763	THF_DHG_CYH	Tetrahydrofolate dehydrogenase/cyclohydrolase, catalytic domain
P18242	Ctsd	13033	Cathepsin D	GO:0062023,GO:0010008,GO:0005615,GO:0005765,GO:0005764,GO:0042470,GO:0045121,GO:0005739,GO:0004190,GO:0070001,GO:0004175,GO:0016787,GO:0008233,GO:0042277,GO:0000045,GO:0042159,GO:0043065,GO:0043280,GO:0006508,GO:0070201	collagen-containing extracellular matrix|endosome membrane|extracellular space|lysosomal membrane|lysosome|melanosome|membrane raft|mitochondrion|aspartic-type endopeptidase activity|aspartic-type peptidase activity|endopeptidase activity|hydrolase activity|peptidase activity|peptide binding|autophagosome assembly|lipoprotein catabolic process|positive regulation of apoptotic process|positive reg…	mmu04071,mmu04142,mmu04140,mmu04210,mmu04915,mmu05152,mmu05415	Sphingolipid signaling pathway|Lysosome|Autophagy - animal|Apoptosis|Estrogen signaling pathway|Tuberculosis|Diabetic cardiomyopathy	KOG1339	[O]	Aspartyl protease	Posttranslational modification, protein turnover, chaperones	KOG1339	M	aspartic-type endopeptidase activity	Cell wall/membrane/envelope biogenesis	PF00026	Asp	Eukaryotic aspartyl protease
P18572	Bsg	12215	Basigin	GO:0002080,GO:0030424,GO:0016323,GO:0005789,GO:0005768,GO:0005887,GO:0043231,GO:0045121,GO:0005739,GO:0001917,GO:0001750,GO:0005886,GO:0042383,GO:0098632,GO:0005537,GO:0038023,GO:0001618,GO:0001525,GO:0007411,GO:0046697,GO:0070593,GO:0007566,GO:0061154,GO:0007156,GO:0003407,GO:0030593,GO:0042475,GO:0045494,GO:0010595,GO:0032755,GO:1904466,GO:0010575,GO:0046598,GO:0072659,GO:0051591,GO:0046689,GO:…	acrosomal membrane|axon|basolateral plasma membrane|endoplasmic reticulum membrane|endosome|integral component of plasma membrane|intracellular membrane-bounded organelle|membrane raft|mitochondrion|photoreceptor inner segment|photoreceptor outer segment|plasma membrane|sarcolemma|cell-cell adhesion mediator activity|mannose binding|signaling receptor activity|virus receptor activity|angiogenesis…							ENOG502QPKN	S	mannose binding	Function unknown	PF13927	Ig_3	Immunoglobulin domain
P18760	Cfl1	12631	Cofilin-1	GO:0015629,GO:0031252,GO:0005911,GO:0090732,GO:0030864,GO:0005737,GO:0005829,GO:0043197,GO:0005576,GO:0030175,GO:0005925,GO:0098978,GO:0030426,GO:0030027,GO:0031258,GO:0031966,GO:0043005,GO:0043025,GO:0016363,GO:0032587,GO:0097060,GO:0003779,GO:0051015,GO:1902936,GO:0019903,GO:0005102,GO:0030042,GO:0030043,GO:0007015,GO:0051014,GO:0048870,GO:0030030,GO:0071364,GO:0070301,GO:1990314,GO:0071347,GO:…	actin cytoskeleton|cell leading edge|cell-cell junction|cofilin-actin rod|cortical actin cytoskeleton|cytoplasm|cytosol|dendritic spine|extracellular region|filopodium|focal adhesion|glutamatergic synapse|growth cone|lamellipodium|lamellipodium membrane|mitochondrial membrane|neuron projection|neuronal cell body|nuclear matrix|ruffle membrane|synaptic membrane|actin binding|actin filament binding…	mmu04810,mmu04666,mmu04360,mmu05170,mmu05133	Regulation of actin cytoskeleton|Fc gamma R-mediated phagocytosis|Axon guidance|Human immunodeficiency virus 1 infection|Pertussis	KOG1735	[Z]	Actin depolymerizing factor	Cytoskeleton	KOG1735	O	actin filament depolymerization	Posttranslational modification, protein turnover, chaperones	PF00241	Cofilin_ADF	Cofilin/tropomyosin-type actin-binding protein
P19001	Krt19	16669	Keratin, type I cytoskeletal 19	GO:0016327,GO:0071944,GO:0043034,GO:0016010,GO:0005882,GO:0005886,GO:0042383,GO:1990357,GO:0030018,GO:0044877,GO:0008307,GO:0060706,GO:0007219,GO:0043627,GO:0045214	apicolateral plasma membrane|cell periphery|costamere|dystrophin-associated glycoprotein complex|intermediate filament|plasma membrane|sarcolemma|terminal web|Z disc|protein-containing complex binding|structural constituent of muscle|cell differentiation involved in embryonic placenta development|Notch signaling pathway|response to estrogen|sarcomere organization	mmu04915,mmu05150	Estrogen signaling pathway|Staphylococcus aureus infection					ENOG502QV0B	S	structural molecule activity	Function unknown	PF00038	Filament	Intermediate filament protein
P19096	Fasn	14104	Fatty acid synthase	GO:0005737,GO:0005829,GO:0042587,GO:0005794,GO:0042470,GO:0005739,GO:0005886,GO:0008659,GO:0008693,GO:0047451,GO:0004317,GO:0102131,GO:0102132,GO:0004316,GO:0004315,GO:0004313,GO:0004314,GO:0047117,GO:0004312,GO:0042802,GO:0016295,GO:0004320,GO:0016296,GO:0031177,GO:0006084,GO:0071353,GO:0090557,GO:0008611,GO:0006633,GO:0002068,GO:0030879,GO:0030224,GO:0030223,GO:0009888	cytoplasm|cytosol|glycogen granule|Golgi apparatus|melanosome|mitochondrion|plasma membrane|(3R)-hydroxymyristoyl-[acyl-carrier-protein] dehydratase activity|3-hydroxydecanoyl-[acyl-carrier-protein] dehydratase activity|3-hydroxyoctanoyl-[acyl-carrier-protein] dehydratase activity|3-hydroxypalmitoyl-[acyl-carrier-protein] dehydratase activity|3-oxo-glutaryl-[acp] methyl ester reductase activity|3…	mmu00061,mmu04152,mmu04910,mmu04936	Fatty acid biosynthesis|AMPK signaling pathway|Insulin signaling pathway|Alcoholic liver disease	KOG1202	[I]	Animal-type fatty acid synthase and related proteins	Lipid transport and metabolism	KOG1202	Q	phosphopantetheine binding	Secondary metabolites biosynthesis, transport and catabolism	PF00107	ADH_zinc_N	Zinc-binding dehydrogenase
P19157	Gstp1	14870	Glutathione S-transferase P 1	GO:0005737,GO:0005829,GO:0005739,GO:0005634,GO:0005886,GO:0032991,GO:0097057,GO:0035731,GO:0005504,GO:0004602,GO:0004364,GO:0008432,GO:0019207,GO:0019901,GO:0035730,GO:0031100,GO:0071460,GO:0071364,GO:0071385,GO:0032869,GO:0071222,GO:0035726,GO:1901687,GO:0006749,GO:0051122,GO:0002674,GO:0043066,GO:0070373,GO:2001237,GO:0048147,GO:0043124,GO:0032691,GO:0043508,GO:0070664,GO:0043407,GO:0071638,GO:…	cytoplasm|cytosol|mitochondrion|nucleus|plasma membrane|protein-containing complex|TRAF2-GSTP1 complex|dinitrosyl-iron complex binding|fatty acid binding|glutathione peroxidase activity|glutathione transferase activity|JUN kinase binding|kinase regulator activity|protein kinase binding|S-nitrosoglutathione binding|animal organ regeneration|cellular response to cell-matrix adhesion|cellular respon…	mmu00480,mmu00980,mmu00982,mmu00983,mmu05200,mmu05204,mmu05225,mmu05215,mmu05418,mmu01524	Glutathione metabolism|Metabolism of xenobiotics by cytochrome P450|Drug metabolism - cytochrome P450|Drug metabolism - other enzymes|Pathways in cancer|Chemical carcinogenesis - DNA adducts|Hepatocellular carcinoma|Prostate cancer|Fluid shear stress and atherosclerosis|Platinum drug resistance	KOG1695	[O]	Glutathione S-transferase	Posttranslational modification, protein turnover, chaperones	KOG1695	O	glutathione transferase activity	Posttranslational modification, protein turnover, chaperones	PF02798	GST_N	Glutathione S-transferase, N-terminal domain
P19221	F2	14061	Prothrombin	GO:0062023,GO:0009897,GO:0005615,GO:0005509,GO:0008201,GO:0001530,GO:0008233,GO:0004252,GO:0005102,GO:0070053,GO:0006953,GO:0061844,GO:0007596,GO:0007166,GO:0051838,GO:0042730,GO:0048712,GO:1900016,GO:0045861,GO:0070945,GO:0030168,GO:0030194,GO:0030307,GO:0008284,GO:0032967,GO:0090218,GO:0014068,GO:1900738,GO:1900182,GO:0001934,GO:2000379,GO:0051281,GO:0008360,GO:0051480,GO:0010468,GO:0009611,GO:…	collagen-containing extracellular matrix|external side of plasma membrane|extracellular space|calcium ion binding|heparin binding|lipopolysaccharide binding|peptidase activity|serine-type endopeptidase activity|signaling receptor binding|thrombospondin receptor activity|acute-phase response|antimicrobial humoral immune response mediated by antimicrobial peptide|blood coagulation|cell surface rece…	mmu04072,mmu04080,mmu04810,mmu04610,mmu04611,mmu05200,mmu05171	Phospholipase D signaling pathway|Neuroactive ligand-receptor interaction|Regulation of actin cytoskeleton|Complement and coagulation cascades|Platelet activation|Pathways in cancer|Coronavirus disease - COVID-19					ENOG502QTSX	O	cytolysis by host of symbiont cells	Posttranslational modification, protein turnover, chaperones	PF00051	Kringle	Kringle domain
P19253	Rpl13a	22121	60S ribosomal protein L13a	GO:0005829,GO:0022625,GO:0022626,GO:0097452,GO:1990904,GO:0005840,GO:0003729,GO:0003735,GO:0071346,GO:0042592,GO:0060425,GO:0048246,GO:1901194,GO:0017148,GO:0032496,GO:0006412	cytosol|cytosolic large ribosomal subunit|cytosolic ribosome|GAIT complex|ribonucleoprotein complex|ribosome|mRNA binding|structural constituent of ribosome|cellular response to interferon-gamma|homeostatic process|lung morphogenesis|macrophage chemotaxis|negative regulation of formation of translation preinitiation complex|negative regulation of translation|response to lipopolysaccharide|transla…	mmu03010,mmu05171	Ribosome|Coronavirus disease - COVID-19	KOG3204	[J]	60S ribosomal protein L13a	Translation, ribosomal structure and biogenesis	KOG3204	J	Belongs to the universal ribosomal protein uL13 family	Translation, ribosomal structure and biogenesis	PF00572	Ribosomal_L13	Ribosomal protein L13
P19324	Serpinh1	12406	Serpin H1	GO:0062023,GO:0005737,GO:0005783,GO:0005788,GO:0005793,GO:0005615,GO:0045121,GO:0005518,GO:0004867,GO:0051082,GO:0003433,GO:0032964,GO:0030199,GO:0010951,GO:0051604	collagen-containing extracellular matrix|cytoplasm|endoplasmic reticulum|endoplasmic reticulum lumen|endoplasmic reticulum-Golgi intermediate compartment|extracellular space|membrane raft|collagen binding|serine-type endopeptidase inhibitor activity|unfolded protein binding|chondrocyte development involved in endochondral bone morphogenesis|collagen biosynthetic process|collagen fibril organizati…			KOG2392	[V]	Serpin	Defense mechanisms	KOG2392	O	serine-type endopeptidase inhibitor activity	Posttranslational modification, protein turnover, chaperones	PF00079	Serpin	Serpin (serine protease inhibitor)
P19536	Cox5b	12859	Cytochrome c oxidase subunit 5B, mitochondrial	GO:0005743,GO:0005751,GO:0005739,GO:0043209,GO:0046872,GO:0006123	mitochondrial inner membrane|mitochondrial respiratory chain complex IV|mitochondrion|myelin sheath|metal ion binding|mitochondrial electron transport, cytochrome c to oxygen	mmu00190,mmu04260,mmu04714,mmu05208,mmu05010,mmu05012,mmu05014,mmu05016,mmu05020,mmu05022,mmu05415,mmu04932	Oxidative phosphorylation|Cardiac muscle contraction|Thermogenesis|Chemical carcinogenesis - reactive oxygen species|Alzheimer disease|Parkinson disease|Amyotrophic lateral sclerosis|Huntington disease|Prion disease|Pathways of neurodegeneration - multiple diseases|Diabetic cardiomyopathy|Non-alcoholic fatty liver disease	KOG3352	[C]	Cytochrome c oxidase, subunit Vb/COX4	Energy production and conversion	KOG3352	S	mitochondrial ATP synthesis coupled proton transport	Function unknown	PF01215	COX5B	Cytochrome c oxidase subunit Vb
P19783	Cox4i1	12857	Cytochrome c oxidase subunit 4 isoform 1, mitochondrial	GO:0005829,GO:0016021,GO:0005743,GO:0031966,GO:0005751,GO:0005739,GO:0005654,GO:0016491,GO:0006123,GO:0007584	cytosol|integral component of membrane|mitochondrial inner membrane|mitochondrial membrane|mitochondrial respiratory chain complex IV|mitochondrion|nucleoplasm|oxidoreductase activity|mitochondrial electron transport, cytochrome c to oxygen|response to nutrient	mmu00190,mmu04260,mmu04714,mmu05208,mmu05010,mmu05012,mmu05014,mmu05016,mmu05020,mmu05022,mmu05415,mmu04932	Oxidative phosphorylation|Cardiac muscle contraction|Thermogenesis|Chemical carcinogenesis - reactive oxygen species|Alzheimer disease|Parkinson disease|Amyotrophic lateral sclerosis|Huntington disease|Prion disease|Pathways of neurodegeneration - multiple diseases|Diabetic cardiomyopathy|Non-alcoholic fatty liver disease	KOG4075	[C]	Cytochrome c oxidase, subunit IV/COX5b	Energy production and conversion	KOG4075	S	Cytochrome c oxidase subunit	Function unknown	PF02936	COX4	Cytochrome c oxidase subunit IV
P20029	Hspa5	14828	Endoplasmic reticulum chaperone BiP	GO:0009986,GO:0008180,GO:0005737,GO:0005829,GO:0005783,GO:0034663,GO:0005788,GO:0005789,GO:0005793,GO:0005576,GO:0030176,GO:0043231,GO:0016020,GO:0030496,GO:0005739,GO:0043209,GO:0005634,GO:0005886,GO:0032991,GO:0005790,GO:0005524,GO:0140603,GO:0019899,GO:0031072,GO:0051787,GO:0019904,GO:0044183,GO:0043022,GO:0031625,GO:0051082,GO:0071236,GO:0071277,GO:0071320,GO:0035690,GO:0071480,GO:0042149,GO:…	cell surface|COP9 signalosome|cytoplasm|cytosol|endoplasmic reticulum|endoplasmic reticulum chaperone complex|endoplasmic reticulum lumen|endoplasmic reticulum membrane|endoplasmic reticulum-Golgi intermediate compartment|extracellular region|integral component of endoplasmic reticulum membrane|intracellular membrane-bounded organelle|membrane|midbody|mitochondrion|myelin sheath|nucleus|plasma me…	mmu03060,mmu04141,mmu04612,mmu04918,mmu05012,mmu05014,mmu05020,mmu05022,mmu05417	Protein export|Protein processing in endoplasmic reticulum|Antigen processing and presentation|Thyroid hormone synthesis|Parkinson disease|Amyotrophic lateral sclerosis|Prion disease|Pathways of neurodegeneration - multiple diseases|Lipid and atherosclerosis	KOG0100	[O]	Molecular chaperones GRP78/BiP/KAR2, HSP70 superfamily	Posttranslational modification, protein turnover, chaperones	KOG0100	O	ATP binding	Posttranslational modification, protein turnover, chaperones	PF00012	HSP70	Hsp70 protein
P20108	Prdx3	11757	Thioredoxin-dependent peroxide reductase, mitochondrial	GO:0005737,GO:0005829,GO:0005769,GO:0005739,GO:0043209,GO:0032991,GO:0043027,GO:0042802,GO:0019900,GO:0008022,GO:0019901,GO:0008379,GO:0045454,GO:0034599,GO:0034614,GO:0042744,GO:0001893,GO:0007005,GO:0030099,GO:0043066,GO:0033673,GO:0043524,GO:0018171,GO:0008284,GO:0051092,GO:0051881,GO:0042542,GO:0032496,GO:0006979	cytoplasm|cytosol|early endosome|mitochondrion|myelin sheath|protein-containing complex|cysteine-type endopeptidase inhibitor activity involved in apoptotic process|identical protein binding|kinase binding|protein C-terminus binding|protein kinase binding|thioredoxin peroxidase activity|cell redox homeostasis|cellular response to oxidative stress|cellular response to reactive oxygen species|hydro…			KOG0852	[O]	Alkyl hydroperoxide reductase, thiol specific antioxidant and related enzymes	Posttranslational modification, protein turnover, chaperones	KOG0852	O	peroxiredoxin activity	Posttranslational modification, protein turnover, chaperones	PF00578	AhpC-TSA	AhpC/TSA family
P20152	Vim	22352	Vimentin	GO:0030424,GO:0044297,GO:0031252,GO:0042995,GO:0005737,GO:0005856,GO:0005829,GO:0005882,GO:0045111,GO:0043005,GO:0016363,GO:0048471,GO:0005777,GO:0045335,GO:0005886,GO:0005844,GO:1990904,GO:0045098,GO:0003725,GO:0042802,GO:1990254,GO:0019900,GO:0019904,GO:0019901,GO:0051721,GO:0097110,GO:0005200,GO:0005212,GO:0014002,GO:0060020,GO:0071346,GO:0071222,GO:0071225,GO:0045109,GO:0045103,GO:0070307,GO:…	axon|cell body|cell leading edge|cell projection|cytoplasm|cytoskeleton|cytosol|intermediate filament|intermediate filament cytoskeleton|neuron projection|nuclear matrix|perinuclear region of cytoplasm|peroxisome|phagocytic vesicle|plasma membrane|polysome|ribonucleoprotein complex|type III intermediate filament|double-stranded RNA binding|identical protein binding|keratin filament binding|kinase…	mmu05206,mmu05169	MicroRNAs in cancer|Epstein-Barr virus infection					KOG0977	S	intermediate filament organization	Function unknown	PF00038	Filament	Intermediate filament protein
P20444	Prkca	18750	Protein kinase C alpha type	GO:0035866,GO:0045177,GO:0030424,GO:0044305,GO:0005737,GO:0005829,GO:0030425,GO:0005783,GO:0014704,GO:0016020,GO:0045121,GO:0031966,GO:0005739,GO:0043005,GO:0043025,GO:0005634,GO:0048471,GO:0001750,GO:0005886,GO:0099523,GO:0032991,GO:0005524,GO:0004698,GO:0019899,GO:0035403,GO:0005178,GO:0004672,GO:0004697,GO:0106310,GO:0004674,GO:0106311,GO:0008270,GO:0001525,GO:0007155,GO:0006874,GO:0071322,GO:…	alphav-beta3 integrin-PKCalpha complex|apical part of cell|axon|calyx of Held|cytoplasm|cytosol|dendrite|endoplasmic reticulum|intercalated disc|membrane|membrane raft|mitochondrial membrane|mitochondrion|neuron projection|neuronal cell body|nucleus|perinuclear region of cytoplasm|photoreceptor outer segment|plasma membrane|presynaptic cytosol|protein-containing complex|ATP binding|calcium-depend…	mmu04010,mmu04012,mmu04014,mmu04015,mmu04310,mmu04370,mmu04066,mmu04020,mmu04070,mmu04072,mmu04071,mmu04151,mmu04150,mmu04510,mmu04540,mmu04613,mmu04650,mmu04664,mmu04666,mmu04670,mmu04911,mmu04929,mmu04912,mmu04921,mmu04926,mmu04935,mmu04918,mmu04919,mmu04928,mmu04916,mmu04925,mmu04261,mmu04270,mmu04970,mmu04971,mmu04972,mmu04960,mmu04961,mmu04724,mmu04727,mmu04725,mmu04728,mmu04726,mmu04720,mmu…	MAPK signaling pathway|ErbB signaling pathway|Ras signaling pathway|Rap1 signaling pathway|Wnt signaling pathway|VEGF signaling pathway|HIF-1 signaling pathway|Calcium signaling pathway|Phosphatidylinositol signaling system|Phospholipase D signaling pathway|Sphingolipid signaling pathway|PI3K-Akt signaling pathway|mTOR signaling pathway|Focal adhesion|Gap junction|Neutrophil extracellular trap fo…	KOG0696	[T]	Serine/threonine protein kinase	Signal transduction mechanisms	KOG0696	T	Protein kinase c	Signal transduction mechanisms	PF00130	C1_1	Phorbol esters/diacylglycerol binding domain (C1 domain)
P21107	Tpm3	621968	Tropomyosin alpha-3 chain	GO:0015629,GO:0005884,GO:0032154,GO:0030863,GO:0005737,GO:0005829,GO:0030426,GO:0043005,GO:0002102,GO:0001725,GO:0051015,GO:0007015,GO:0006936	actin cytoskeleton|actin filament|cleavage furrow|cortical cytoskeleton|cytoplasm|cytosol|growth cone|neuron projection|podosome|stress fiber|actin filament binding|actin filament organization|muscle contraction											PF00261	Tropomyosin	Tropomyosin
P21279	Gnaq	14682	Guanine nucleotide-binding protein G(q) subunit alpha	GO:0005901,GO:0044297,GO:0005829,GO:0030425,GO:0005794,GO:0005834,GO:0016020,GO:0031965,GO:0005886,GO:0045202,GO:0047391,GO:0001664,GO:0031683,GO:0005525,GO:0005096,GO:0003924,GO:0046872,GO:0044877,GO:0031826,GO:0001508,GO:0007202,GO:0007189,GO:0007188,GO:0048066,GO:0042733,GO:0021884,GO:0007186,GO:0007215,GO:0007507,GO:0042711,GO:0043066,GO:0043267,GO:0006469,GO:0016322,GO:0060158,GO:0007200,GO:…	caveola|cell body|cytosol|dendrite|Golgi apparatus|heterotrimeric G-protein complex|membrane|nuclear membrane|plasma membrane|synapse|alkylglycerophosphoethanolamine phosphodiesterase activity|G protein-coupled receptor binding|G-protein beta/gamma-subunit complex binding|GTP binding|GTPase activator activity|GTPase activity|metal ion binding|protein-containing complex binding|type 2A serotonin r…	mmu04015,mmu04371,mmu04020,mmu04071,mmu04022,mmu04540,mmu04611,mmu04062,mmu04911,mmu04922,mmu04929,mmu04912,mmu04915,mmu04921,mmu04935,mmu04918,mmu04928,mmu04916,mmu04924,mmu04925,mmu04927,mmu04261,mmu04270,mmu04970,mmu04971,mmu04972,mmu04961,mmu04724,mmu04725,mmu04728,mmu04726,mmu04720,mmu04730,mmu04723,mmu04750,mmu04713,mmu05200,mmu05170,mmu05163,mmu05135,mmu05146,mmu05142,mmu05143,mmu05010,mmu…	Rap1 signaling pathway|Apelin signaling pathway|Calcium signaling pathway|Sphingolipid signaling pathway|cGMP-PKG signaling pathway|Gap junction|Platelet activation|Chemokine signaling pathway|Insulin secretion|Glucagon signaling pathway|GnRH secretion|GnRH signaling pathway|Estrogen signaling pathway|Oxytocin signaling pathway|Growth hormone synthesis, secretion and action|Thyroid hormone synthe…	KOG0085	[T]	G protein subunit Galphaq/Galphay, small G protein superfamily	Signal transduction mechanisms	KOG0085	S	phospholipase C-activating dopamine receptor signaling pathway	Function unknown	PF00503	G-alpha	G-protein alpha subunit
P21550	Eno3	13808	Beta-enolase	GO:0005829,GO:0016020,GO:0000015,GO:0005886,GO:0042802,GO:0000287,GO:0004634,GO:0044877,GO:0007568,GO:0006096,GO:0032889,GO:0042493,GO:0043403	cytosol|membrane|phosphopyruvate hydratase complex|plasma membrane|identical protein binding|magnesium ion binding|phosphopyruvate hydratase activity|protein-containing complex binding|aging|glycolytic process|regulation of vacuole fusion, non-autophagic|response to drug|skeletal muscle tissue regeneration	mmu00010,mmu03018,mmu04066	Glycolysis / Gluconeogenesis|RNA degradation|HIF-1 signaling pathway	KOG2670	[G]	Enolase	Carbohydrate transport and metabolism	KOG2670	G	phosphopyruvate hydratase activity	Carbohydrate transport and metabolism	PF00113	Enolase_C	Enolase, C-terminal TIM barrel domain
P21619	Lmnb2	16907	Lamin-B2	GO:0005638,GO:0005635,GO:0005637,GO:0031965,GO:0005634,GO:0042802	lamin filament|nuclear envelope|nuclear inner membrane|nuclear membrane|nucleus|identical protein binding	mmu04210	Apoptosis	KOG0977	[DY]	Nuclear envelope protein lamin, intermediate filament superfamily	Cell cycle control, cell division, chromosome partitioning |Nuclear structure	KOG0977	S	intermediate filament organization	Function unknown	PF00038	Filament	Intermediate filament protein
P21956	Mfge8	17304	Lactadherin	GO:0002080,GO:0062023,GO:0009897,GO:0005615,GO:0019897,GO:0005178,GO:0008429,GO:0001786,GO:0001525,GO:0043277,GO:0007155,GO:0006911,GO:0006910,GO:0050766,GO:0007338	acrosomal membrane|collagen-containing extracellular matrix|external side of plasma membrane|extracellular space|extrinsic component of plasma membrane|integrin binding|phosphatidylethanolamine binding|phosphatidylserine binding|angiogenesis|apoptotic cell clearance|cell adhesion|phagocytosis, engulfment|phagocytosis, recognition|positive regulation of phagocytosis|single fertilization							ENOG502QVK3	S	phosphatidylethanolamine binding	Function unknown	PF00008	EGF	EGF-like domain
P22437	Ptgs1	19224	Prostaglandin G/H synthase 1	GO:0005737,GO:0005789,GO:0005794,GO:0043231,GO:0005635,GO:0001750,GO:0051213,GO:0020037,GO:0046872,GO:0004601,GO:0004666,GO:0019371,GO:0006954,GO:0030216,GO:0007612,GO:0035633,GO:0007613,GO:0032811,GO:0010700,GO:0045987,GO:0045907,GO:0001516,GO:0006693,GO:0008217,GO:0042127,GO:0006979,GO:0019233	cytoplasm|endoplasmic reticulum membrane|Golgi apparatus|intracellular membrane-bounded organelle|nuclear envelope|photoreceptor outer segment|dioxygenase activity|heme binding|metal ion binding|peroxidase activity|prostaglandin-endoperoxide synthase activity|cyclooxygenase pathway|inflammatory response|keratinocyte differentiation|learning|maintenance of blood-brain barrier|memory|negative regul…	mmu00590,mmu04611,mmu04923,mmu04726	Arachidonic acid metabolism|Platelet activation|Regulation of lipolysis in adipocytes|Serotonergic synapse	KOG2408	[R]	Peroxidase/oxygenase	General function prediction only	KOG2408	I	peroxidase activity	Lipid transport and metabolism	PF03098	An_peroxidase	Animal haem peroxidase
P22892	Ap1g1	11765	AP-1 complex subunit gamma-1	GO:0030121,GO:0030136,GO:0005829,GO:0005794,GO:0043231,GO:0015630,GO:0048471,GO:0055037,GO:0005802,GO:0140312,GO:0035615,GO:0005518,GO:0030742,GO:0019894,GO:0008022,GO:0031267,GO:0035646,GO:0090160,GO:0006896,GO:0006886,GO:0000226,GO:0043323,GO:0045954,GO:0006898,GO:0016192	AP-1 adaptor complex|clathrin-coated vesicle|cytosol|Golgi apparatus|intracellular membrane-bounded organelle|microtubule cytoskeleton|perinuclear region of cytoplasm|recycling endosome|trans-Golgi network|cargo adaptor activity|clathrin adaptor activity|collagen binding|GTP-dependent protein binding|kinesin binding|protein C-terminus binding|small GTPase binding|endosome to melanosome transport|…	mmu04142,mmu05170	Lysosome|Human immunodeficiency virus 1 infection	KOG1062	[U]	Vesicle coat complex AP-1, gamma subunit	Intracellular trafficking, secretion, and vesicular transport	KOG1062	G	intracellular protein transport	Carbohydrate transport and metabolism	PF01602	Adaptin_N	Adaptin N terminal region
P22907	Hmbs	15288	Porphobilinogen deaminase	GO:0030424,GO:0005737,GO:0005829,GO:0005634,GO:0048471,GO:0043176,GO:0031406,GO:0004418,GO:0004852,GO:0006783,GO:0001889,GO:0018160,GO:0006779,GO:0006778,GO:0006782,GO:0042493,GO:0033014	axon|cytoplasm|cytosol|nucleus|perinuclear region of cytoplasm|amine binding|carboxylic acid binding|hydroxymethylbilane synthase activity|uroporphyrinogen-III synthase activity|heme biosynthetic process|liver development|peptidyl-pyrromethane cofactor linkage|porphyrin-containing compound biosynthetic process|porphyrin-containing compound metabolic process|protoporphyrinogen IX biosynthetic proc…	mmu00860	Porphyrin metabolism	KOG2892	[H]	Porphobilinogen deaminase	Coenzyme transport and metabolism	KOG2892	H	porphobilinogen deaminase	Coenzyme transport and metabolism	PF01379	Porphobil_deam	Porphobilinogen deaminase, dipyromethane cofactor binding domain
P23116	Eif3a	13669	Eukaryotic translation initiation factor 3 subunit A	GO:0005829,GO:0016282,GO:0033290,GO:0005852,GO:0071540,GO:0071541,GO:0005874,GO:0005815,GO:0043614,GO:0005730,GO:0005654,GO:0005634,GO:0014069,GO:0003729,GO:0030971,GO:0003723,GO:0003743,GO:0001732,GO:0075522,GO:0070373,GO:0002188,GO:0075525	cytosol|eukaryotic 43S preinitiation complex|eukaryotic 48S preinitiation complex|eukaryotic translation initiation factor 3 complex|eukaryotic translation initiation factor 3 complex, eIF3e|eukaryotic translation initiation factor 3 complex, eIF3m|microtubule|microtubule organizing center|multi-eIF complex|nucleolus|nucleoplasm|nucleus|postsynaptic density|mRNA binding|receptor tyrosine kinase b…			KOG2072	[J]	Translation initiation factor 3, subunit a (eIF-3a)	Translation, ribosomal structure and biogenesis	KOG2072	J	translation initiation factor activity	Translation, ribosomal structure and biogenesis	PF01399	PCI	PCI domain
P23198	Cbx3	12417	Chromobox protein homolog 3	GO:0000785,GO:0010369,GO:0000775,GO:0000779,GO:0000791,GO:0000792,GO:0005635,GO:0005654,GO:0005634,GO:0005721,GO:0090575,GO:0035985,GO:0090734,GO:0005819,GO:0019899,GO:1990226,GO:0042802,GO:0019904,GO:0000976,GO:0006974,GO:0006325,GO:0045892,GO:0048511	chromatin|chromocenter|chromosome, centromeric region|condensed chromosome, centromeric region|euchromatin|heterochromatin|nuclear envelope|nucleoplasm|nucleus|pericentric heterochromatin|RNA polymerase II transcription regulator complex|senescence-associated heterochromatin focus|site of DNA damage|spindle|enzyme binding|histone methyltransferase binding|identical protein binding|protein domain …			KOG1911	[B]	Heterochromatin-associated protein HP1 and related CHROMO domain proteins	Chromatin structure and dynamics	KOG1911	K	methylated histone binding	Transcription	PF00385	Chromo	Chromo (CHRromatin Organisation MOdifier) domain
P23492	Pnp	18950	Purine nucleoside phosphorylase	GO:0005737,GO:0005829,GO:0005576,GO:0005634,GO:0047975,GO:0042802,GO:0001882,GO:0042301,GO:0002060,GO:0004731,GO:0006154,GO:0000255,GO:0006196,GO:0008637,GO:0046059,GO:0006157,GO:0006161,GO:0006149,GO:0046055,GO:0046070,GO:0046038,GO:0006183,GO:0046115,GO:0006204,GO:0006148,GO:0008630,GO:0070233,GO:0046638,GO:0045579,GO:0045739,GO:0001916,GO:0042102,GO:0042278,GO:0006166,GO:0010332,GO:0034418	cytoplasm|cytosol|extracellular region|nucleus|guanosine phosphorylase activity|identical protein binding|nucleoside binding|phosphate ion binding|purine nucleobase binding|purine-nucleoside phosphorylase activity|adenosine catabolic process|allantoin metabolic process|AMP catabolic process|apoptotic mitochondrial changes|dAMP catabolic process|deoxyadenosine catabolic process|deoxyguanosine cata…	mmu00230,mmu00240,mmu00760	Purine metabolism|Pyrimidine metabolism|Nicotinate and nicotinamide metabolism	KOG3984	[F]	Purine nucleoside phosphorylase	Nucleotide transport and metabolism	KOG3984	F	nicotinamide riboside catabolic process	Nucleotide transport and metabolism	PF01048	PNP_UDP_1	Phosphorylase superfamily
P23506	Pcmt1	18537	Protein-L-isoaspartate(D-aspartate) O-methyltransferase	GO:0016323,GO:0031526,GO:0005737,GO:0005829,GO:0005615,GO:0043005,GO:0043204,GO:0004719,GO:0008757,GO:0010667,GO:0006479,GO:0046498,GO:0046500	basolateral plasma membrane|brush border membrane|cytoplasm|cytosol|extracellular space|neuron projection|perikaryon|protein-L-isoaspartate (D-aspartate) O-methyltransferase activity|S-adenosylmethionine-dependent methyltransferase activity|negative regulation of cardiac muscle cell apoptotic process|protein methylation|S-adenosylhomocysteine metabolic process|S-adenosylmethionine metabolic proce…			KOG1661	[O]	Protein-L-isoaspartate(D-aspartate) O-methyltransferase	Posttranslational modification, protein turnover, chaperones	KOG1661	O	protein-L-isoaspartate (D-aspartate) O-methyltransferase activity	Posttranslational modification, protein turnover, chaperones	PF01135	PCMT	Protein-L-isoaspartate(D-aspartate) O-methyltransferase (PCMT)
P23591	Gfus	22122	GDP-L-fucose synthase	GO:0050577,GO:0047918,GO:0042802,GO:0042351,GO:0019673,GO:0010595,GO:1904906,GO:0001913	GDP-L-fucose synthase activity|GDP-mannose 3,5-epimerase activity|identical protein binding|'de novo' GDP-L-fucose biosynthetic process|GDP-mannose metabolic process|positive regulation of endothelial cell migration|positive regulation of endothelial cell-matrix adhesion via fibronectin|T cell mediated cytotoxicity	mmu00051,mmu00520	Fructose and mannose metabolism|Amino sugar and nucleotide sugar metabolism	KOG1431	[GO]	GDP-L-fucose synthetase	Carbohydrate transport and metabolism |Posttranslational modification, protein turnover, chaperones	KOG1431	G	GDP-L-fucose synthase activity	Carbohydrate transport and metabolism	PF01370	Epimerase	NAD dependent epimerase/dehydratase family
P23780	Glb1	12091	Beta-galactosidase	GO:0005737,GO:0005615,GO:0005794,GO:0043231,GO:0005764,GO:0005773,GO:0004565,GO:0016936,GO:0016787,GO:0042803,GO:0044262,GO:0019388,GO:0051413,GO:1904016	cytoplasm|extracellular space|Golgi apparatus|intracellular membrane-bounded organelle|lysosome|vacuole|beta-galactosidase activity|galactoside binding|hydrolase activity|protein homodimerization activity|cellular carbohydrate metabolic process|galactose catabolic process|response to cortisone|response to Thyroglobulin triiodothyronine	mmu00052,mmu00600,mmu00531,mmu00604,mmu00511,mmu04142	Galactose metabolism|Sphingolipid metabolism|Glycosaminoglycan degradation|Glycosphingolipid biosynthesis - ganglio series|Other glycan degradation|Lysosome	KOG0496	[G]	Beta-galactosidase	Carbohydrate transport and metabolism	KOG0496	G	beta-galactosidase activity	Carbohydrate transport and metabolism	PF01301	Glyco_hydro_35	Glycosyl hydrolases family 35
P24270	Cat	12359	Catalase	GO:0005737,GO:0005829,GO:0005783,GO:0005615,GO:0005794,GO:0043231,GO:0005764,GO:0005758,GO:0005739,GO:0005778,GO:0005777,GO:0005886,GO:0032991,GO:0004046,GO:0016209,GO:0004096,GO:0019899,GO:0020037,GO:0042802,GO:0046872,GO:0050661,GO:0016684,GO:0000268,GO:0042803,GO:0009060,GO:0007568,GO:0071363,GO:0008203,GO:0020027,GO:0042744,GO:0001822,GO:0043066,GO:0032088,GO:0051781,GO:0051092,GO:0014068,GO:…	cytoplasm|cytosol|endoplasmic reticulum|extracellular space|Golgi apparatus|intracellular membrane-bounded organelle|lysosome|mitochondrial intermembrane space|mitochondrion|peroxisomal membrane|peroxisome|plasma membrane|protein-containing complex|aminoacylase activity|antioxidant activity|catalase activity|enzyme binding|heme binding|identical protein binding|metal ion binding|NADP binding|oxid…	mmu00630,mmu00380,mmu04068,mmu04146,mmu04211,mmu04213,mmu05208,mmu05014,mmu05022	Glyoxylate and dicarboxylate metabolism|Tryptophan metabolism|FoxO signaling pathway|Peroxisome|Longevity regulating pathway|Longevity regulating pathway - multiple species|Chemical carcinogenesis - reactive oxygen species|Amyotrophic lateral sclerosis|Pathways of neurodegeneration - multiple diseases	KOG0047	[P]	Catalase	Inorganic ion transport and metabolism	KOG0047	P	catalase activity	Inorganic ion transport and metabolism	PF00199	Catalase	Catalase
P24288	Bcat1	12035	Branched-chain-amino-acid aminotransferase, cytosolic	GO:0005737,GO:0005829,GO:0005739,GO:0004084,GO:0042802,GO:0052656,GO:0052654,GO:0050048,GO:0052655,GO:0009082,GO:0009083,GO:0009098,GO:0009099	cytoplasm|cytosol|mitochondrion|branched-chain-amino-acid transaminase activity|identical protein binding|L-isoleucine transaminase activity|L-leucine transaminase activity|L-leucine:2-oxoglutarate aminotransferase activity|L-valine transaminase activity|branched-chain amino acid biosynthetic process|branched-chain amino acid catabolic process|leucine biosynthetic process|valine biosynthetic proc…	mmu00270,mmu00280,mmu00290,mmu00770	Cysteine and methionine metabolism|Valine, leucine and isoleucine degradation|Valine, leucine and isoleucine biosynthesis|Pantothenate and CoA biosynthesis	KOG0975	[E]	Branched chain aminotransferase BCAT1, pyridoxal phosphate enzymes type IV superfamily	Amino acid transport and metabolism	KOG0975	E	branched-chain-amino-acid transaminase activity	Amino acid transport and metabolism	PF01063	Aminotran_4	Amino-transferase class IV
P24369	Ppib	19035	Peptidyl-prolyl cis-trans isomerase B	GO:0005737,GO:0005783,GO:0034663,GO:0005788,GO:0043231,GO:0042470,GO:0005654,GO:0048471,GO:0032991,GO:0005790,GO:0016018,GO:0003755,GO:0070063,GO:0060348,GO:0061077,GO:0030593,GO:0044829,GO:0044794,GO:0040018,GO:0006457,GO:0000413,GO:0050821	cytoplasm|endoplasmic reticulum|endoplasmic reticulum chaperone complex|endoplasmic reticulum lumen|intracellular membrane-bounded organelle|melanosome|nucleoplasm|perinuclear region of cytoplasm|protein-containing complex|smooth endoplasmic reticulum|cyclosporin A binding|peptidyl-prolyl cis-trans isomerase activity|RNA polymerase binding|bone development|chaperone-mediated protein folding|neutr…			KOG0880	[O]	Peptidyl-prolyl cis-trans isomerase	Posttranslational modification, protein turnover, chaperones	KOG0880	O	peptidyl-prolyl cis-trans isomerase activity	Posttranslational modification, protein turnover, chaperones	PF00160	Pro_isomerase	Cyclophilin type peptidyl-prolyl cis-trans isomerase/CLD
P24452	Capg	12332	Macrophage-capping protein	GO:0015629,GO:0005814,GO:0005737,GO:0005615,GO:0090543,GO:0030027,GO:0042470,GO:0072686,GO:0005730,GO:0005654,GO:0005634,GO:0045335,GO:0001726,GO:0051015,GO:0005546,GO:0019904,GO:0044877,GO:0051014,GO:0008154,GO:0051016,GO:0030031,GO:0071346,GO:0007417	actin cytoskeleton|centriole|cytoplasm|extracellular space|Flemming body|lamellipodium|melanosome|mitotic spindle|nucleolus|nucleoplasm|nucleus|phagocytic vesicle|ruffle|actin filament binding|phosphatidylinositol-4,5-bisphosphate binding|protein domain specific binding|protein-containing complex binding|actin filament severing|actin polymerization or depolymerization|barbed-end actin filament ca…			KOG0443	[Z]	Actin regulatory proteins (gelsolin/villin family)	Cytoskeleton	KOG0443	A	actin filament capping	RNA processing and modification	PF00626	Gelsolin	Gelsolin repeat
P24472	Gsta4	14860	Glutathione S-transferase A4	GO:0005737,GO:0005739,GO:0004364,GO:0071285,GO:0006749,GO:0009635,GO:0035094,GO:0010043,GO:0006805	cytoplasm|mitochondrion|glutathione transferase activity|cellular response to lithium ion|glutathione metabolic process|response to herbicide|response to nicotine|response to zinc ion|xenobiotic metabolic process	mmu00480,mmu00980,mmu00982,mmu00983,mmu05200,mmu05204,mmu05207,mmu05208,mmu05225,mmu05418,mmu01524	Glutathione metabolism|Metabolism of xenobiotics by cytochrome P450|Drug metabolism - cytochrome P450|Drug metabolism - other enzymes|Pathways in cancer|Chemical carcinogenesis - DNA adducts|Chemical carcinogenesis - receptor activation|Chemical carcinogenesis - reactive oxygen species|Hepatocellular carcinoma|Fluid shear stress and atherosclerosis|Platinum drug resistance	KOG1695	[O]	Glutathione S-transferase	Posttranslational modification, protein turnover, chaperones	KOG1695	O	glutathione transferase activity	Posttranslational modification, protein turnover, chaperones	PF00043	GST_C	Glutathione S-transferase, C-terminal domain
P24527	Lta4h	16993	Leukotriene A-4 hydrolase	GO:0005737,GO:0005829,GO:0005654,GO:0005634,GO:0004177,GO:0004301,GO:0004463,GO:0070006,GO:0045148,GO:0008270,GO:0044267,GO:0019370,GO:0006691,GO:0043171	cytoplasm|cytosol|nucleoplasm|nucleus|aminopeptidase activity|epoxide hydrolase activity|leukotriene-A4 hydrolase activity|metalloaminopeptidase activity|tripeptide aminopeptidase activity|zinc ion binding|cellular protein metabolic process|leukotriene biosynthetic process|leukotriene metabolic process|peptide catabolic process	mmu00590	Arachidonic acid metabolism	KOG1047	[IOVE]	Bifunctional leukotriene A4 hydrolase/aminopeptidase LTA4H	Lipid transport and metabolism |Posttranslational modification, protein turnover, chaperones |Defense mechanisms |Amino acid transport and metabolism	KOG1047	E	epoxide hydrolase activity	Amino acid transport and metabolism	PF01433	Peptidase_M1	Peptidase family M1 domain
P24547	Impdh2	23918	Inosine-5'-monophosphate dehydrogenase 2	GO:0005737,GO:0005829,GO:0005634,GO:0003677,GO:0042802,GO:0003938,GO:0046872,GO:0000166,GO:0003723,GO:0071353,GO:0007623,GO:0006177,GO:0006183,GO:0046651,GO:0006164,GO:0060041	cytoplasm|cytosol|nucleus|DNA binding|identical protein binding|IMP dehydrogenase activity|metal ion binding|nucleotide binding|RNA binding|cellular response to interleukin-4|circadian rhythm|GMP biosynthetic process|GTP biosynthetic process|lymphocyte proliferation|purine nucleotide biosynthetic process|retina development in camera-type eye	mmu00230,mmu00983	Purine metabolism|Drug metabolism - other enzymes	KOG2550	[F]	IMP dehydrogenase/GMP reductase	Nucleotide transport and metabolism	KOG2550	F	IMP dehydrogenase activity	Nucleotide transport and metabolism	PF00478	IMPDH	IMP dehydrogenase / GMP reductase domain
P24549	Aldh1a1	11668	Aldehyde dehydrogenase 1A1	GO:0030424,GO:0005737,GO:0005829,GO:0005634,GO:0045202,GO:0004028,GO:0106373,GO:0004029,GO:0019145,GO:0018479,GO:0042802,GO:0051287,GO:0001758,GO:0042904,GO:0042905,GO:0110095,GO:0048048,GO:0030392,GO:0009449,GO:0036438,GO:0120163,GO:0002072,GO:0043065,GO:0042493,GO:0045471,GO:0006979,GO:0002138,GO:0042573,GO:0001523,GO:0042572	axon|cytoplasm|cytosol|nucleus|synapse|3-chloroallyl aldehyde dehydrogenase activity|3-deoxyglucosone dehydrogenase activity|aldehyde dehydrogenase (NAD+) activity|aminobutyraldehyde dehydrogenase activity|benzaldehyde dehydrogenase (NAD+) activity|identical protein binding|NAD binding|retinal dehydrogenase activity|9-cis-retinoic acid biosynthetic process|9-cis-retinoic acid metabolic process|ce…	mmu00830	Retinol metabolism	KOG2450	[C]	Aldehyde dehydrogenase	Energy production and conversion	KOG2450	C	aldehyde dehydrogenase (NAD) activity	Energy production and conversion	PF00171	Aldedh	Aldehyde dehydrogenase family
P24668	M6pr	17113	Cation-dependent mannose-6-phosphate receptor	GO:0005768,GO:0016021,GO:0005770,GO:0005765,GO:0048471,GO:0005802,GO:0019904,GO:1905394,GO:0006886,GO:0007041,GO:0006622,GO:0033299	endosome|integral component of membrane|late endosome|lysosomal membrane|perinuclear region of cytoplasm|trans-Golgi network|protein domain specific binding|retromer complex binding|intracellular protein transport|lysosomal transport|protein targeting to lysosome|secretion of lysosomal enzymes	mmu04145,mmu04142,mmu05132	Phagosome|Lysosome|Salmonella infection					ENOG502QTJ5	S	mannose transmembrane transporter activity	Function unknown	PF02157	Man-6-P_recep	Mannose-6-phosphate receptor
P25206	Mcm3	17215	DNA replication licensing factor MCM3	GO:0005813,GO:0071162,GO:0005737,GO:0042555,GO:0005654,GO:0005634,GO:0048471,GO:0005524,GO:0140603,GO:0003678,GO:0003688,GO:0003697,GO:0006271,GO:0000727,GO:1902975,GO:0006267	centrosome|CMG complex|cytoplasm|MCM complex|nucleoplasm|nucleus|perinuclear region of cytoplasm|ATP binding|ATP hydrolysis activity|DNA helicase activity|DNA replication origin binding|single-stranded DNA binding|DNA strand elongation involved in DNA replication|double-strand break repair via break-induced replication|mitotic DNA replication initiation|pre-replicative complex assembly involved i…	mmu03030,mmu04110	DNA replication|Cell cycle	KOG0479	[L]	DNA replication licensing factor, MCM3 component	Replication, recombination and repair	KOG0479	L	Belongs to the MCM family	Replication, recombination and repair	PF00493	MCM	MCM P-loop domain
P25322	Ccnd1	12443	G1/S-specific cyclin-D1	GO:0005923,GO:0000307,GO:0005737,GO:0005829,GO:0031965,GO:0005654,GO:0005634,GO:0017053,GO:0016538,GO:0019899,GO:0042826,GO:0016301,GO:0070064,GO:0004672,GO:0019901,GO:0044877,GO:0003714,GO:0051301,GO:0006974,GO:0071310,GO:0030968,GO:0045444,GO:0000082,GO:0007595,GO:0033327,GO:0097421,GO:0060749,GO:0033598,GO:0044772,GO:0031571,GO:0030857,GO:0000122,GO:0008284,GO:0045737,GO:1900087,GO:0010971,GO:…	bicellular tight junction|cyclin-dependent protein kinase holoenzyme complex|cytoplasm|cytosol|nuclear membrane|nucleoplasm|nucleus|transcription repressor complex|cyclin-dependent protein serine/threonine kinase regulator activity|enzyme binding|histone deacetylase binding|kinase activity|proline-rich region binding|protein kinase activity|protein kinase binding|protein-containing complex bindin…	mmu04310,mmu04340,mmu04390,mmu04371,mmu04630,mmu04068,mmu04151,mmu04152,mmu04110,mmu04115,mmu04218,mmu04510,mmu04530,mmu04917,mmu04921,mmu04919,mmu05200,mmu05206,mmu05205,mmu05207,mmu05203,mmu05210,mmu05212,mmu05225,mmu05226,mmu05214,mmu05216,mmu05221,mmu05220,mmu05218,mmu05219,mmu05215,mmu05213,mmu05224,mmu05222,mmu05223,mmu05166,mmu05160,mmu05162,mmu05163,mmu05167,mmu05169,mmu05165,mmu05416,mmu…	Wnt signaling pathway|Hedgehog signaling pathway|Hippo signaling pathway|Apelin signaling pathway|JAK-STAT signaling pathway|FoxO signaling pathway|PI3K-Akt signaling pathway|AMPK signaling pathway|Cell cycle|p53 signaling pathway|Cellular senescence|Focal adhesion|Tight junction|Prolactin signaling pathway|Oxytocin signaling pathway|Thyroid hormone signaling pathway|Pathways in cancer|MicroRNAs …	KOG0656	[D]	G1/S-specific cyclin D	Cell cycle control, cell division, chromosome partitioning	KOG0656	S	cell division	Function unknown	PF00134	Cyclin_N	Cyclin, N-terminal domain
P25444	Rps2	16898	40S ribosomal protein S2	GO:0005829,GO:0022626,GO:0022627,GO:0005654,GO:1990904,GO:0045202,GO:0019899,GO:0017134,GO:0003729,GO:0044877,GO:0003735,GO:0071353,GO:0001731,GO:0051443,GO:0000028,GO:0006412	cytosol|cytosolic ribosome|cytosolic small ribosomal subunit|nucleoplasm|ribonucleoprotein complex|synapse|enzyme binding|fibroblast growth factor binding|mRNA binding|protein-containing complex binding|structural constituent of ribosome|cellular response to interleukin-4|formation of translation preinitiation complex|positive regulation of ubiquitin-protein transferase activity|ribosomal small s…	mmu03010,mmu05171	Ribosome|Coronavirus disease - COVID-19	KOG0877	[J]	40S ribosomal protein S2/30S ribosomal protein S5	Translation, ribosomal structure and biogenesis	KOG0877	J	structural constituent of ribosome	Translation, ribosomal structure and biogenesis	PF00333	Ribosomal_S5	Ribosomal protein S5, N-terminal domain
P25976	Ubtf	21429	Nucleolar transcription factor 1	GO:0001650,GO:0005730,GO:0005634,GO:0003682,GO:0001165,GO:0001164,GO:0001181,GO:0097110,GO:1990830,GO:0045943,GO:0006360,GO:0006362,GO:0006361	fibrillar center|nucleolus|nucleus|chromatin binding|RNA polymerase I cis-regulatory region sequence-specific DNA binding|RNA polymerase I core promoter sequence-specific DNA binding|RNA polymerase I general transcription initiation factor activity|scaffold protein binding|cellular response to leukemia inhibitory factor|positive regulation of transcription by RNA polymerase I|transcription by RNA…			KOG0381	[R]	HMG box-containing protein	General function prediction only	KOG0381	B	DNA binding	Chromatin structure and dynamics	PF00505	HMG_box	HMG (high mobility group) box
P26039	Tln1	21894	Talin-1	GO:0005912,GO:0009986,GO:0005737,GO:0005856,GO:0005925,GO:0005886,GO:0001726,GO:0032587,GO:0051015,GO:0005178,GO:0030274,GO:0035091,GO:0001786,GO:0005200,GO:0017166,GO:0098609,GO:0007044,GO:0030866,GO:0033622,GO:0007229	adherens junction|cell surface|cytoplasm|cytoskeleton|focal adhesion|plasma membrane|ruffle|ruffle membrane|actin filament binding|integrin binding|LIM domain binding|phosphatidylinositol binding|phosphatidylserine binding|structural constituent of cytoskeleton|vinculin binding|cell-cell adhesion|cell-substrate junction assembly|cortical actin cytoskeleton organization|integrin activation|integri…	mmu04015,mmu04510,mmu04611,mmu05166	Rap1 signaling pathway|Focal adhesion|Platelet activation|Human T-cell leukemia virus 1 infection	KOG4261	[Z]	Talin	Cytoskeleton	KOG4261	O	cytoskeletal anchoring at plasma membrane	Posttranslational modification, protein turnover, chaperones	PF00373	FERM_M	FERM central domain
P26040	Ezr	22350	Ezrin	GO:0015629,GO:0005884,GO:0045177,GO:0016324,GO:0097449,GO:0016323,GO:0005903,GO:0044297,GO:0005938,GO:0071944,GO:0042995,GO:0051286,GO:0036064,GO:0005737,GO:0098592,GO:0005829,GO:0005768,GO:0019898,GO:0001650,GO:0030175,GO:0005925,GO:0001772,GO:0045121,GO:0044393,GO:0005902,GO:0031528,GO:0043209,GO:0048471,GO:0005886,GO:0044853,GO:0032991,GO:0001726,GO:0032587,GO:0097454,GO:0030315,GO:0001931,GO:…	actin cytoskeleton|actin filament|apical part of cell|apical plasma membrane|astrocyte projection|basolateral plasma membrane|brush border|cell body|cell cortex|cell periphery|cell projection|cell tip|ciliary basal body|cytoplasm|cytoplasmic side of apical plasma membrane|cytosol|endosome|extrinsic component of membrane|fibrillar center|filopodium|focal adhesion|immunological synapse|membrane raf…	mmu04530,mmu04810,mmu04670,mmu04971,mmu05206,mmu05205	Tight junction|Regulation of actin cytoskeleton|Leukocyte transendothelial migration|Gastric acid secretion|MicroRNAs in cancer|Proteoglycans in cancer	KOG3529	[R]	Radixin, moesin and related proteins of the ERM family	General function prediction only	KOG3529	S	actin binding	Function unknown	PF00373	FERM_M	FERM central domain
P26041	Msn	17698	Moesin	GO:0045177,GO:0016324,GO:0016323,GO:0071944,GO:0009986,GO:0051286,GO:0009898,GO:0005856,GO:0005829,GO:0030175,GO:0031527,GO:0005925,GO:0005902,GO:0031528,GO:0043209,GO:0048471,GO:0005886,GO:0031143,GO:0030667,GO:0030315,GO:0001931,GO:0003779,GO:0050839,GO:0003725,GO:0019899,GO:0019901,GO:0005102,GO:0071394,GO:0061028,GO:0045198,GO:0022612,GO:0001771,GO:0022614,GO:1903364,GO:2000643,GO:0010628,GO:…	apical part of cell|apical plasma membrane|basolateral plasma membrane|cell periphery|cell surface|cell tip|cytoplasmic side of plasma membrane|cytoskeleton|cytosol|filopodium|filopodium membrane|focal adhesion|microvillus|microvillus membrane|myelin sheath|perinuclear region of cytoplasm|plasma membrane|pseudopodium|secretory granule membrane|T-tubule|uropod|actin binding|cell adhesion molecule …	mmu04530,mmu04810,mmu04670,mmu05205,mmu05162	Tight junction|Regulation of actin cytoskeleton|Leukocyte transendothelial migration|Proteoglycans in cancer|Measles	KOG3529	[R]	Radixin, moesin and related proteins of the ERM family	General function prediction only	KOG3529	S	actin binding	Function unknown	PF00373	FERM_M	FERM central domain
P26043	Rdx	19684	Radixin	GO:0005912,GO:0045177,GO:0016324,GO:0071944,GO:0051286,GO:0032154,GO:0030864,GO:0005829,GO:0030175,GO:0030027,GO:0005902,GO:0030496,GO:0043209,GO:0005886,GO:0001726,GO:0032420,GO:0030315,GO:0003779,GO:0051117,GO:0019904,GO:0045176,GO:0051016,GO:0097067,GO:0061028,GO:0045184,GO:0030033,GO:1903392,GO:0045792,GO:0034260,GO:0034111,GO:0030335,GO:1903364,GO:2000643,GO:1900087,GO:0010628,GO:1902966,GO:…	adherens junction|apical part of cell|apical plasma membrane|cell periphery|cell tip|cleavage furrow|cortical actin cytoskeleton|cytosol|filopodium|lamellipodium|microvillus|midbody|myelin sheath|plasma membrane|ruffle|stereocilium|T-tubule|actin binding|ATPase binding|protein domain specific binding|apical protein localization|barbed-end actin filament capping|cellular response to thyroid hormon…	mmu04530,mmu04810,mmu05206,mmu05205	Tight junction|Regulation of actin cytoskeleton|MicroRNAs in cancer|Proteoglycans in cancer	KOG3529	[R]	Radixin, moesin and related proteins of the ERM family	General function prediction only	KOG3529	O	actin binding	Posttranslational modification, protein turnover, chaperones	PF00373	FERM_M	FERM central domain
P26231	Ctnna1	12385	Catenin alpha-1	GO:0001669,GO:0015629,GO:0005912,GO:0016342,GO:0030054,GO:0005911,GO:0005737,GO:0005829,GO:0016600,GO:0014704,GO:0043231,GO:0030027,GO:0005886,GO:0005915,GO:0051015,GO:0008013,GO:0045296,GO:0045295,GO:0042802,GO:0044877,GO:0005198,GO:0017166,GO:0007015,GO:0007568,GO:0043297,GO:0031103,GO:0016477,GO:0098609,GO:0034613,GO:0071681,GO:0090136,GO:0007163,GO:0016264,GO:0008584,GO:0043066,GO:2000146,GO:…	acrosomal vesicle|actin cytoskeleton|adherens junction|catenin complex|cell junction|cell-cell junction|cytoplasm|cytosol|flotillin complex|intercalated disc|intracellular membrane-bounded organelle|lamellipodium|plasma membrane|zonula adherens|actin filament binding|beta-catenin binding|cadherin binding|gamma-catenin binding|identical protein binding|protein-containing complex binding|structural…	mmu04390,mmu04520,mmu04670,mmu05200,mmu05226,mmu05213,mmu05100,mmu05412	Hippo signaling pathway|Adherens junction|Leukocyte transendothelial migration|Pathways in cancer|Gastric cancer|Endometrial cancer|Bacterial invasion of epithelial cells|Arrhythmogenic right ventricular cardiomyopathy	KOG3681	[W]	Alpha-catenin	Extracellular structures	KOG3681	S	actin filament binding	Function unknown	PF01044	Vinculin	Vinculin family
P26350	Ptma	19231	Prothymosin alpha	GO:0005634,GO:0042393,GO:0043486,GO:0043066	nucleus|histone binding|histone exchange|negative regulation of apoptotic process							ENOG502S55T	S	activating transcription factor binding	Function unknown	PF03247	Prothymosin	Prothymosin/parathymosin family
P26369	U2af2	22185	Splicing factor U2AF 65 kDa subunit	GO:0000243,GO:0016607,GO:0005634,GO:0000974,GO:0005681,GO:0071004,GO:0089701,GO:0070742,GO:0019899,GO:0008187,GO:0030628,GO:0000398,GO:0048025,GO:0031397,GO:0033120,GO:0008380	commitment complex|nuclear speck|nucleus|Prp19 complex|spliceosomal complex|U2-type prespliceosome|U2AF complex|C2H2 zinc finger domain binding|enzyme binding|poly-pyrimidine tract binding|pre-mRNA 3'-splice site binding|mRNA splicing, via spliceosome|negative regulation of mRNA splicing, via spliceosome|negative regulation of protein ubiquitination|positive regulation of RNA splicing|RNA splicing	mmu03040	Spliceosome	KOG0120	[A]	Splicing factor U2AF, large subunit (RRM superfamily)	RNA processing and modification	KOG0120	J	pre-mRNA 3'-splice site binding	Translation, ribosomal structure and biogenesis	PF00076	RRM_1	RNA recognition motif. (a.k.a. RRM, RBD, or RNP domain)
P26443	Glud1	14661	Glutamate dehydrogenase 1, mitochondrial	GO:0005737,GO:0005783,GO:0005743,GO:0005759,GO:0005739,GO:0043531,GO:0005524,GO:0019899,GO:0004352,GO:0004354,GO:0004353,GO:0005525,GO:0070728,GO:0070403,GO:0021549,GO:0006537,GO:0006538,GO:0006541,GO:0007616,GO:0032024,GO:0010044,GO:0072350	cytoplasm|endoplasmic reticulum|mitochondrial inner membrane|mitochondrial matrix|mitochondrion|ADP binding|ATP binding|enzyme binding|glutamate dehydrogenase (NAD+) activity|glutamate dehydrogenase (NADP+) activity|glutamate dehydrogenase [NAD(P)+] activity|GTP binding|leucine binding|NAD+ binding|cerebellum development|glutamate biosynthetic process|glutamate catabolic process|glutamine metabol…	mmu00910,mmu00250,mmu00220,mmu04217,mmu04964	Nitrogen metabolism|Alanine, aspartate and glutamate metabolism|Arginine biosynthesis|Necroptosis|Proximal tubule bicarbonate reclamation	KOG2250	[E]	Glutamate/leucine/phenylalanine/valine dehydrogenases	Amino acid transport and metabolism	KOG2250	E	glutamate dehydrogenase [NAD(P)+] activity	Amino acid transport and metabolism	PF00208	ELFV_dehydrog	Glutamate/Leucine/Phenylalanine/Valine dehydrogenase
P26516	Psmd7	17463	26S proteasome non-ATPase regulatory subunit 7	GO:0005654,GO:0000502,GO:0005838,GO:0070122,GO:0008237,GO:0042803,GO:0043161	nucleoplasm|proteasome complex|proteasome regulatory particle|isopeptidase activity|metallopeptidase activity|protein homodimerization activity|proteasome-mediated ubiquitin-dependent protein catabolic process	mmu03050,mmu05169,mmu05010,mmu05012,mmu05014,mmu05016,mmu05017,mmu05020,mmu05022	Proteasome|Epstein-Barr virus infection|Alzheimer disease|Parkinson disease|Amyotrophic lateral sclerosis|Huntington disease|Spinocerebellar ataxia|Prion disease|Pathways of neurodegeneration - multiple diseases	KOG1556	[O]	26S proteasome regulatory complex, subunit RPN8/PSMD7	Posttranslational modification, protein turnover, chaperones	KOG1556	Z	proteasome-mediated ubiquitin-dependent protein catabolic process	Cytoskeleton	PF01398	JAB	JAB1/Mov34/MPN/PAD-1 ubiquitin protease
P26638	Sars1	20226	Serine--tRNA ligase, cytoplasmic	GO:0005737,GO:0005829,GO:0005739,GO:0005634,GO:0005524,GO:0019899,GO:0042803,GO:0000978,GO:0004828,GO:0000049,GO:0016525,GO:0000122,GO:1904046,GO:0097056,GO:0006434	cytoplasm|cytosol|mitochondrion|nucleus|ATP binding|enzyme binding|protein homodimerization activity|RNA polymerase II cis-regulatory region sequence-specific DNA binding|serine-tRNA ligase activity|tRNA binding|negative regulation of angiogenesis|negative regulation of transcription by RNA polymerase II|negative regulation of vascular endothelial growth factor production|selenocysteinyl-tRNA(Sec…	mmu00970	Aminoacyl-tRNA biosynthesis	KOG2509	[J]	Seryl-tRNA synthetase	Translation, ribosomal structure and biogenesis	KOG2509	J	seryl-tRNA aminoacylation	Translation, ribosomal structure and biogenesis	PF00587	tRNA-synt_2b	tRNA synthetase class II core domain (G, H, P, S and T)
P26645	Marcks	17118	Myristoylated alanine-rich C-kinase substrate	GO:0032432,GO:0005938,GO:0005813,GO:0005737,GO:0042585,GO:0016020,GO:0005886,GO:0051015,GO:0005516,GO:0042802,GO:0005080,GO:0051764,GO:0051017,GO:0007015,GO:0007417	actin filament bundle|cell cortex|centrosome|cytoplasm|germinal vesicle|membrane|plasma membrane|actin filament binding|calmodulin binding|identical protein binding|protein kinase C binding|actin crosslink formation|actin filament bundle assembly|actin filament organization|central nervous system development	mmu04666,mmu05206	Fc gamma R-mediated phagocytosis|MicroRNAs in cancer					ENOG502RB4V	S	calmodulin binding	Function unknown	PF02063	MARCKS	MARCKS family
P26883	Fkbp1a	14225	Peptidyl-prolyl cis-trans isomerase FKBP1A	GO:0043679,GO:0005737,GO:0098562,GO:0005829,GO:0031312,GO:0043231,GO:0016020,GO:1990425,GO:0016529,GO:0033017,GO:0045202,GO:0030018,GO:0048185,GO:0019899,GO:0005528,GO:0030544,GO:0042802,GO:0003755,GO:0046332,GO:0005160,GO:0044325,GO:0034713,GO:1990000,GO:0061077,GO:0019221,GO:0003007,GO:0060347,GO:0006936,GO:0032515,GO:0030512,GO:0032092,GO:0031398,GO:0000413,GO:0032925,GO:1902991,GO:0050776,GO:…	axon terminus|cytoplasm|cytoplasmic side of membrane|cytosol|extrinsic component of organelle membrane|intracellular membrane-bounded organelle|membrane|ryanodine receptor complex|sarcoplasmic reticulum|sarcoplasmic reticulum membrane|synapse|Z disc|activin binding|enzyme binding|FK506 binding|Hsp70 protein binding|identical protein binding|peptidyl-prolyl cis-trans isomerase activity|SMAD bindin…			KOG0544	[O]	FKBP-type peptidyl-prolyl cis-trans isomerase	Posttranslational modification, protein turnover, chaperones	KOG0544	O	Peptidyl-prolyl cis-trans isomerase	Posttranslational modification, protein turnover, chaperones	PF00254	FKBP_C	FKBP-type peptidyl-prolyl cis-trans isomerase
P27046	Man2a1	17158	Alpha-mannosidase 2	GO:0005801,GO:0005615,GO:0005794,GO:0005797,GO:0000139,GO:0016021,GO:0004559,GO:0030246,GO:0016787,GO:0016799,GO:0042802,GO:0015923,GO:0004572,GO:0046872,GO:0042803,GO:0001701,GO:0001889,GO:0048286,GO:0006013,GO:0007005,GO:0006491,GO:0050769,GO:0006517,GO:0006486,GO:0007585,GO:0060042,GO:0007033	cis-Golgi network|extracellular space|Golgi apparatus|Golgi medial cisterna|Golgi membrane|integral component of membrane|alpha-mannosidase activity|carbohydrate binding|hydrolase activity|hydrolase activity, hydrolyzing N-glycosyl compounds|identical protein binding|mannosidase activity|mannosyl-oligosaccharide 1,3-1,6-alpha-mannosidase activity|metal ion binding|protein homodimerization activit…	mmu00510,mmu00513	N-Glycan biosynthesis|Various types of N-glycan biosynthesis	KOG1958	[G]	Glycosyl hydrolase, family 38 - alpha-mannosidase	Carbohydrate transport and metabolism	KOG1958	O	mannosyl-oligosaccharide 1,3-1,6-alpha-mannosidase activity	Posttranslational modification, protein turnover, chaperones	PF01074	Glyco_hydro_38N	Glycosyl hydrolases family 38 N-terminal domain
P27546	Map4	17758	Microtubule-associated protein 4	GO:0030424,GO:0005930,GO:0005829,GO:0005874,GO:0015630,GO:0072686,GO:0043005,GO:0005886,GO:0014069,GO:0008017,GO:0051301,GO:0051294,GO:0000226,GO:0051012,GO:0007052,GO:1902856,GO:0031175	axon|axoneme|cytosol|microtubule|microtubule cytoskeleton|mitotic spindle|neuron projection|plasma membrane|postsynaptic density|microtubule binding|cell division|establishment of spindle orientation|microtubule cytoskeleton organization|microtubule sliding|mitotic spindle organization|negative regulation of non-motile cilium assembly|neuron projection development							KOG2418	S	regulation of diacylglycerol kinase activity	Function unknown	PF00418	Tubulin-binding	Tau and MAP protein, tubulin-binding repeat
P27601	Gna13	14674	Guanine nucleotide-binding protein subunit alpha-13	GO:0031526,GO:0005737,GO:0005829,GO:0005834,GO:0042470,GO:0005634,GO:0005886,GO:0031752,GO:0001664,GO:0031683,GO:0005525,GO:0003924,GO:0046872,GO:0031584,GO:0007189,GO:0007188,GO:0001525,GO:0001569,GO:0030154,GO:0007186,GO:0001701,GO:0035556,GO:1904753,GO:1904706,GO:0030168,GO:0007204,GO:0030334,GO:0008360,GO:0007266	brush border membrane|cytoplasm|cytosol|heterotrimeric G-protein complex|melanosome|nucleus|plasma membrane|D5 dopamine receptor binding|G protein-coupled receptor binding|G-protein beta/gamma-subunit complex binding|GTP binding|GTPase activity|metal ion binding|activation of phospholipase D activity|adenylate cyclase-activating G protein-coupled receptor signaling pathway|adenylate cyclase-modul…	mmu04371,mmu04072,mmu04071,mmu04022,mmu04810,mmu04611,mmu04928,mmu04270,mmu04730,mmu05200,mmu05163	Apelin signaling pathway|Phospholipase D signaling pathway|Sphingolipid signaling pathway|cGMP-PKG signaling pathway|Regulation of actin cytoskeleton|Platelet activation|Parathyroid hormone synthesis, secretion and action|Vascular smooth muscle contraction|Long-term depression|Pathways in cancer|Human cytomegalovirus infection	KOG0082	[DT]	G-protein alpha subunit (small G protein superfamily)	Cell cycle control, cell division, chromosome partitioning |Signal transduction mechanisms	KOG0082	V	G-protein beta/gamma-subunit complex binding	Defense mechanisms	PF00503	G-alpha	G-protein alpha subunit
P27612	Plaa	18786	Phospholipase A-2-activating protein	GO:0005737,GO:0070062,GO:0005634,GO:0045202,GO:0016005,GO:0043130,GO:0071222,GO:0006954,GO:0016236,GO:1900045,GO:0007399,GO:1903861,GO:2001224,GO:0032430,GO:1903423,GO:0006693,GO:0043161,GO:0010992,GO:0043162	cytoplasm|extracellular exosome|nucleus|synapse|phospholipase A2 activator activity|ubiquitin binding|cellular response to lipopolysaccharide|inflammatory response|macroautophagy|negative regulation of protein K63-linked ubiquitination|nervous system development|positive regulation of dendrite extension|positive regulation of neuron migration|positive regulation of phospholipase A2 activity|posit…	mmu04141	Protein processing in endoplasmic reticulum	KOG0301	[I]	Phospholipase A2-activating protein (contains WD40 repeats)	Lipid transport and metabolism	KOG0301	S	phospholipase A2 activator activity	Function unknown	PF00400	WD40	WD domain, G-beta repeat
P27641	Xrcc5	22596	X-ray repair cross-complementing protein 5	GO:0000781,GO:0005737,GO:0043564,GO:0070419,GO:0005730,GO:0005654,GO:0005634,GO:0005886,GO:0032991,GO:0032993,GO:1990904,GO:0090734,GO:0032040,GO:0051575,GO:0005524,GO:0008094,GO:0003684,GO:0045027,GO:0003678,GO:0003691,GO:0016787,GO:0008022,GO:0044877,GO:0003723,GO:0042162,GO:0000976,GO:0034511,GO:0031625,GO:0002218,GO:0007420,GO:0008283,GO:0071475,GO:0006974,GO:0071398,GO:0071480,GO:1990830,GO:…	chromosome, telomeric region|cytoplasm|Ku70:Ku80 complex|nonhomologous end joining complex|nucleolus|nucleoplasm|nucleus|plasma membrane|protein-containing complex|protein-DNA complex|ribonucleoprotein complex|site of DNA damage|small-subunit processome|5'-deoxyribose-5-phosphate lyase activity|ATP binding|ATPase, acting on DNA|damaged DNA binding|DNA end binding|DNA helicase activity|double-stra…	mmu03450	Non-homologous end-joining	KOG2326	[L]	DNA-binding subunit of a DNA-dependent protein kinase (Ku80 autoantigen)	Replication, recombination and repair	KOG2326	L	telomeric DNA binding	Replication, recombination and repair	PF02735	Ku	Ku70/Ku80 beta-barrel domain
P27659	Rpl3	27367	60S ribosomal protein L3	GO:0005829,GO:0022625,GO:0022626,GO:0005730,GO:0032991,GO:0005840,GO:0045202,GO:0008097,GO:0003723,GO:0003735,GO:0071353,GO:0000027,GO:0006412	cytosol|cytosolic large ribosomal subunit|cytosolic ribosome|nucleolus|protein-containing complex|ribosome|synapse|5S rRNA binding|RNA binding|structural constituent of ribosome|cellular response to interleukin-4|ribosomal large subunit assembly|translation	mmu03010,mmu05171	Ribosome|Coronavirus disease - COVID-19	KOG0746	[J]	60S ribosomal protein L3 and related proteins	Translation, ribosomal structure and biogenesis	KOG0746	J	ribosomal large subunit assembly	Translation, ribosomal structure and biogenesis	PF00297	Ribosomal_L3	Ribosomal protein L3
P27773	Pdia3	14827	Protein disulfide-isomerase A3	GO:0001669,GO:0016324,GO:0009986,GO:0005737,GO:0005783,GO:0005788,GO:0005576,GO:0005615,GO:0042470,GO:0042824,GO:0005758,GO:0005739,GO:0043209,GO:0005634,GO:0005886,GO:0005790,GO:0042825,GO:0042802,GO:0042288,GO:0008233,GO:0003756,GO:0019153,GO:0015035,GO:0098761,GO:0071305,GO:2001238,GO:1903334,GO:0006457,GO:0034976	acrosomal vesicle|apical plasma membrane|cell surface|cytoplasm|endoplasmic reticulum|endoplasmic reticulum lumen|extracellular region|extracellular space|melanosome|MHC class I peptide loading complex|mitochondrial intermembrane space|mitochondrion|myelin sheath|nucleus|plasma membrane|smooth endoplasmic reticulum|TAP complex|identical protein binding|MHC class I protein binding|peptidase activi…	mmu04141,mmu04612,mmu05170,mmu05168,mmu05163,mmu05169	Protein processing in endoplasmic reticulum|Antigen processing and presentation|Human immunodeficiency virus 1 infection|Herpes simplex virus 1 infection|Human cytomegalovirus infection|Epstein-Barr virus infection	KOG0190	[O]	Protein disulfide isomerase (prolyl 4-hydroxylase beta subunit)	Posttranslational modification, protein turnover, chaperones	KOG0190	C	intramolecular oxidoreductase activity, transposing S-S bonds	Energy production and conversion	PF00085	Thioredoxin	Thioredoxin
P27808	Mgat1	17308	Alpha-1,3-mannosyl-glycoprotein 2-beta-N-acetylglucosaminyltransferase	GO:0005794,GO:0000139,GO:0016021,GO:0048471,GO:0008375,GO:0003827,GO:0030145,GO:0001701,GO:0006486,GO:0006487,GO:0018279,GO:0006049	Golgi apparatus|Golgi membrane|integral component of membrane|perinuclear region of cytoplasm|acetylglucosaminyltransferase activity|alpha-1,3-mannosylglycoprotein 2-beta-N-acetylglucosaminyltransferase activity|manganese ion binding|in utero embryonic development|protein glycosylation|protein N-linked glycosylation|protein N-linked glycosylation via asparagine|UDP-N-acetylglucosamine catabolic p…	mmu00510,mmu00513	N-Glycan biosynthesis|Various types of N-glycan biosynthesis	KOG1413	[G]	N-acetylglucosaminyltransferase I	Carbohydrate transport and metabolism	KOG1413	O	alpha-1,3-mannosylglycoprotein 2-beta-N-acetylglucosaminyltransferase activity	Posttranslational modification, protein turnover, chaperones	PF03071	GNT-I	GNT-I family
P28301	Lox	16948	Protein-lysine 6-oxidase	GO:0005581,GO:0062023,GO:0031012,GO:0005576,GO:0005615,GO:0005634,GO:0005518,GO:0005507,GO:0004720,GO:0035904,GO:0035905,GO:0001568,GO:0048514,GO:0030282,GO:0060326,GO:1990869,GO:0071310,GO:0030199,GO:0061448,GO:0035906,GO:0071897,GO:0048251,GO:0007507,GO:0030324,GO:0046716,GO:0055001,GO:0001649,GO:0018057,GO:0035791,GO:0043491,GO:0018158,GO:0042981,GO:1903010,GO:0010468,GO:0045652,GO:2000586,GO:…	collagen trimer|collagen-containing extracellular matrix|extracellular matrix|extracellular region|extracellular space|nucleus|collagen binding|copper ion binding|protein-lysine 6-oxidase activity|aorta development|ascending aorta development|blood vessel development|blood vessel morphogenesis|bone mineralization|cell chemotaxis|cellular response to chemokine|cellular response to organic substanc…							ENOG502QWQR	S	protein-lysine 6-oxidase activity	Function unknown	PF01186	Lysyl_oxidase	Lysyl oxidase
P28352	Apex1	11792	DNA-(apurinic or apyrimidinic site) endonuclease	GO:0005813,GO:0005737,GO:0005783,GO:0005739,GO:0016607,GO:0005730,GO:0005654,GO:0005634,GO:0048471,GO:0005667,GO:0008408,GO:0031490,GO:0003684,GO:0003677,GO:0003906,GO:0008311,GO:0008309,GO:0003691,GO:0004521,GO:0046872,GO:0051059,GO:0016491,GO:0004528,GO:0008081,GO:0044877,GO:0003723,GO:0016890,GO:0003713,GO:0007568,GO:0006284,GO:0045454,GO:0071320,GO:0070301,GO:0071375,GO:0080111,GO:0006310,GO:…	centrosome|cytoplasm|endoplasmic reticulum|mitochondrion|nuclear speck|nucleolus|nucleoplasm|nucleus|perinuclear region of cytoplasm|transcription regulator complex|3'-5' exonuclease activity|chromatin DNA binding|damaged DNA binding|DNA binding|DNA-(apurinic or apyrimidinic site) endonuclease activity|double-stranded DNA 3'-5' exodeoxyribonuclease activity|double-stranded DNA exodeoxyribonucleas…	mmu03410	Base excision repair	KOG1294	[L]	Apurinic/apyrimidinic endonuclease and related enzymes	Replication, recombination and repair	KOG1294	L	double-stranded DNA 3'-5' exodeoxyribonuclease activity	Replication, recombination and repair	PF03372	Exo_endo_phos	Endonuclease/Exonuclease/phosphatase family
P28474	Adh5	11532	Alcohol dehydrogenase class-3	GO:0005737,GO:0005829,GO:0005739,GO:0005634,GO:0004022,GO:0004024,GO:0005504,GO:0018467,GO:0042802,GO:0051903,GO:0106322,GO:0106321,GO:0008270,GO:0006068,GO:0006069,GO:0010430,GO:0046294,GO:0018119,GO:0045777,GO:0003016,GO:0032496,GO:0051409,GO:0051775,GO:0001523	cytoplasm|cytosol|mitochondrion|nucleus|alcohol dehydrogenase (NAD+) activity|alcohol dehydrogenase activity, zinc-dependent|fatty acid binding|formaldehyde dehydrogenase activity|identical protein binding|S-(hydroxymethyl)glutathione dehydrogenase activity|S-(hydroxymethyl)glutathione dehydrogenase NAD activity|S-(hydroxymethyl)glutathione dehydrogenase NADP activity|zinc ion binding|ethanol cat…	mmu00010,mmu00620,mmu00071,mmu00350,mmu00830,mmu00980,mmu00982,mmu04936	Glycolysis / Gluconeogenesis|Pyruvate metabolism|Fatty acid degradation|Tyrosine metabolism|Retinol metabolism|Metabolism of xenobiotics by cytochrome P450|Drug metabolism - cytochrome P450|Alcoholic liver disease	KOG0022	[Q]	Alcohol dehydrogenase, class III	Secondary metabolites biosynthesis, transport and catabolism	KOG0022	C	alcohol dehydrogenase (NAD) activity	Energy production and conversion	PF00107	ADH_zinc_N	Zinc-binding dehydrogenase
P28571	Slc6a9	14664	Sodium- and chloride-dependent glycine transporter 1	GO:0016324,GO:0032279,GO:0009925,GO:0016323,GO:0031045,GO:0005768,GO:0098686,GO:0016021,GO:0005887,GO:0099055,GO:0099056,GO:0030285,GO:0016328,GO:0098688,GO:0005886,GO:0014069,GO:0005283,GO:0015187,GO:1903804,GO:0061537,GO:0015816,GO:1904782,GO:0001504,GO:0070455,GO:0046985,GO:1904440,GO:1904256,GO:0035725	apical plasma membrane|asymmetric synapse|basal plasma membrane|basolateral plasma membrane|dense core granule|endosome|hippocampal mossy fiber to CA3 synapse|integral component of membrane|integral component of plasma membrane|integral component of postsynaptic membrane|integral component of presynaptic membrane|integral component of synaptic vesicle membrane|lateral plasma membrane|parallel fib…	mmu04721	Synaptic vesicle cycle	KOG3660	[T]	Sodium-neurotransmitter symporter	Signal transduction mechanisms	KOG3660	U	neurotransmitter:sodium symporter activity	Intracellular trafficking, secretion, and vesicular transport	PF00209	SNF	Sodium:neurotransmitter symporter family
P28653	Bgn	12111	Biglycan	GO:0009986,GO:0062023,GO:0031012,GO:0005615,GO:0042383,GO:0030133,GO:0050840,GO:0005539,GO:0061975,GO:0001974,GO:0060348,GO:0019800	cell surface|collagen-containing extracellular matrix|extracellular matrix|extracellular space|sarcolemma|transport vesicle|extracellular matrix binding|glycosaminoglycan binding|articular cartilage development|blood vessel remodeling|bone development|peptide cross-linking via chondroitin 4-sulfate glycosaminoglycan			KOG0619	[R]	FOG: Leucine rich repeat	General function prediction only	KOG0619	U	regulation of response to stimulus	Intracellular trafficking, secretion, and vesicular transport	PF01462	LRRNT	Leucine rich repeat N-terminal domain
P28656	Nap1l1	53605	Nucleosome assembly protein 1-like 1	GO:0000785,GO:0005737,GO:0042470,GO:0043005,GO:0005634,GO:0003682,GO:0042393,GO:0019900,GO:0006334,GO:2000179,GO:0050769	chromatin|cytoplasm|melanosome|neuron projection|nucleus|chromatin binding|histone binding|kinase binding|nucleosome assembly|positive regulation of neural precursor cell proliferation|positive regulation of neurogenesis			KOG1507	[BD]	Nucleosome assembly protein NAP-1	Chromatin structure and dynamics |Cell cycle control, cell division, chromosome partitioning	KOG1507	S	nucleosome assembly	Function unknown	PF00956	NAP	Nucleosome assembly protein (NAP)
P28658	Atxn10	54138	Ataxin-10	GO:0005737,GO:0005829,GO:0030425,GO:0043025,GO:0048471,GO:0005886,GO:0019899,GO:0042802,GO:0060271,GO:0007399,GO:0031175	cytoplasm|cytosol|dendrite|neuronal cell body|perinuclear region of cytoplasm|plasma membrane|enzyme binding|identical protein binding|cilium assembly|nervous system development|neuron projection development	mmu05017	Spinocerebellar ataxia	KOG2676	[S]	Uncharacterized conserved protein	Function unknown	KOG2676	J	threonine biosynthetic process	Translation, ribosomal structure and biogenesis	PF09759	Atx10homo_assoc	Spinocerebellar ataxia type 10 protein domain
P28659	Celf1	13046	CUGBP Elav-like family member 1	GO:0005737,GO:0010494,GO:0005654,GO:0005634,GO:0097356,GO:1990904,GO:0042835,GO:0003730,GO:0003729,GO:0036002,GO:0003723,GO:0031369,GO:0021987,GO:0061157,GO:0006376,GO:0008285,GO:0010942,GO:0010628,GO:0040018,GO:0016441,GO:0000381,GO:0051726,GO:0050727,GO:0043484,GO:0007286	cytoplasm|cytoplasmic stress granule|nucleoplasm|nucleus|perinucleolar compartment|ribonucleoprotein complex|BRE binding|mRNA 3'-UTR binding|mRNA binding|pre-mRNA binding|RNA binding|translation initiation factor binding|cerebral cortex development|mRNA destabilization|mRNA splice site selection|negative regulation of cell population proliferation|positive regulation of cell death|positive regula…			KOG0144	[A]	RNA-binding protein CUGBP1/BRUNO (RRM superfamily)	RNA processing and modification	KOG0144	J	RNA binding	Translation, ribosomal structure and biogenesis	PF00076	RRM_1	RNA recognition motif. (a.k.a. RRM, RBD, or RNP domain)
P28660	Nckap1	50884	Nck-associated protein 1	GO:0031941,GO:0016021,GO:0030027,GO:0031258,GO:0098794,GO:0001726,GO:0031209,GO:0045176,GO:0045175,GO:0016477,GO:0042074,GO:0000902,GO:0030031,GO:0030866,GO:0010172,GO:0048617,GO:0035050,GO:0007492,GO:0030950,GO:0001701,GO:0030032,GO:0008078,GO:0001843,GO:0048812,GO:0030903,GO:0048570,GO:0048339,GO:0048340,GO:0030838,GO:2000601,GO:0010592,GO:0050821,GO:0016601,GO:0032880,GO:0001756,GO:0007354	filamentous actin|integral component of membrane|lamellipodium|lamellipodium membrane|postsynapse|ruffle|SCAR complex|apical protein localization|basal protein localization|cell migration|cell migration involved in gastrulation|cell morphogenesis|cell projection assembly|cortical actin cytoskeleton organization|embryonic body morphogenesis|embryonic foregut morphogenesis|embryonic heart tube deve…	mmu04810,mmu05132	Regulation of actin cytoskeleton|Salmonella infection	KOG1917	[R]	Membrane-associated hematopoietic protein	General function prediction only	KOG1917	S	positive regulation of actin filament polymerization	Function unknown	PF09735	Nckap1	Membrane-associated apoptosis protein
P28667	Marcksl1	17357	MARCKS-related protein	GO:0099026,GO:0005737,GO:0005856,GO:0005886,GO:0099523,GO:0008021,GO:0051015,GO:0005516,GO:0099626,GO:0007015,GO:0007417,GO:0008284	anchored component of presynaptic membrane|cytoplasm|cytoskeleton|plasma membrane|presynaptic cytosol|synaptic vesicle|actin filament binding|calmodulin binding|voltage-gated calcium channel activity involved in regulation of presynaptic cytosolic calcium levels|actin filament organization|central nervous system development|positive regulation of cell population proliferation	mmu04666,mmu05140	Fc gamma R-mediated phagocytosis|Leishmaniasis					ENOG502RYXK	S	calmodulin binding	Function unknown	PF02063	MARCKS	MARCKS family
P28740	Kif2a	16563	Kinesin-like protein KIF2A	GO:0120103,GO:0005814,GO:0005813,GO:0005737,GO:0005871,GO:0005764,GO:0005874,GO:0016604,GO:0005730,GO:0005654,GO:0097228,GO:0005819,GO:0000922,GO:0005524,GO:1990939,GO:0008017,GO:0003777,GO:0019901,GO:0030154,GO:0051301,GO:0000226,GO:0007018,GO:0090307,GO:0007052,GO:0007399,GO:0030334	centriolar subdistal appendage|centriole|centrosome|cytoplasm|kinesin complex|lysosome|microtubule|nuclear body|nucleolus|nucleoplasm|sperm principal piece|spindle|spindle pole|ATP binding|ATP-dependent microtubule motor activity|microtubule binding|microtubule motor activity|protein kinase binding|cell differentiation|cell division|microtubule cytoskeleton organization|microtubule-based movement…			KOG0246	[Z]	Kinesin-like protein	Cytoskeleton	KOG0246	Z	microtubule motor activity	Cytoskeleton	PF00225	Kinesin	Kinesin motor domain
P28798	Grn	14824	Progranulin	GO:0005783,GO:0005768,GO:0005576,GO:0005615,GO:0005794,GO:0005770,GO:0005765,GO:0005764,GO:0016020,GO:0005739,GO:0005886,GO:0098793,GO:0005802,GO:0031982,GO:0051087,GO:0005125,GO:0002265,GO:0001835,GO:0035988,GO:0007566,GO:0035641,GO:0007042,GO:1905146,GO:0007041,GO:0007040,GO:0060179,GO:0002282,GO:0051346,GO:0050728,GO:0045824,GO:1903979,GO:0043524,GO:1902564,GO:0060266,GO:0061351,GO:0045766,GO:…	endoplasmic reticulum|endosome|extracellular region|extracellular space|Golgi apparatus|late endosome|lysosomal membrane|lysosome|membrane|mitochondrion|plasma membrane|presynapse|trans-Golgi network|vesicle|chaperone binding|cytokine activity|astrocyte activation involved in immune response|blastocyst hatching|chondrocyte proliferation|embryo implantation|locomotory exploration behavior|lysosoma…			KOG4296	[T]	Epithelin/granulin	Signal transduction mechanisms	KOG4296	M	cysteine-type peptidase activity	Cell wall/membrane/envelope biogenesis	PF00396	Granulin	Granulin
P29341	Pabpc1	18458	Polyadenylate-binding protein 1	GO:0071013,GO:0031252,GO:0005737,GO:0036464,GO:0010494,GO:0005829,GO:0030425,GO:0030027,GO:1990124,GO:0005634,GO:1990904,GO:0045202,GO:0003730,GO:0003729,GO:0008143,GO:0008266,GO:0008022,GO:0003723,GO:0031047,GO:0006397,GO:2000623,GO:0000184,GO:1900153,GO:0060213,GO:0045070,GO:0008380	catalytic step 2 spliceosome|cell leading edge|cytoplasm|cytoplasmic ribonucleoprotein granule|cytoplasmic stress granule|cytosol|dendrite|lamellipodium|messenger ribonucleoprotein complex|nucleus|ribonucleoprotein complex|synapse|mRNA 3'-UTR binding|mRNA binding|poly(A) binding|poly(U) RNA binding|protein C-terminus binding|RNA binding|gene silencing by RNA|mRNA processing|negative regulation of…	mmu03015,mmu03018	mRNA surveillance pathway|RNA degradation	KOG0123	[AJ]	Polyadenylate-binding protein (RRM superfamily)	RNA processing and modification |Translation, ribosomal structure and biogenesis	KOG0123	J	mRNA metabolic process	Translation, ribosomal structure and biogenesis	PF00076	RRM_1	RNA recognition motif. (a.k.a. RRM, RBD, or RNP domain)
P29391	Ftl1	14325	Ferritin light chain 1	GO:0044754,GO:0005737,GO:0071682,GO:0005576,GO:0008043,GO:0008199,GO:0008198,GO:0042802,GO:0005506,GO:0006880,GO:0006826	autolysosome|cytoplasm|endocytic vesicle lumen|extracellular region|intracellular ferritin complex|ferric iron binding|ferrous iron binding|identical protein binding|iron ion binding|intracellular sequestering of iron ion|iron ion transport	mmu04216,mmu04217,mmu04978	Ferroptosis|Necroptosis|Mineral absorption	KOG2332	[P]	Ferritin	Inorganic ion transport and metabolism	KOG2332	P	ferric iron binding	Inorganic ion transport and metabolism	PF00210	Ferritin	Ferritin-like domain
P29758	Oat	18242	Ornithine aminotransferase, mitochondrial	GO:0005737,GO:0005759,GO:0005739,GO:0005654,GO:0042802,GO:0050155,GO:0004587,GO:0030170,GO:0019544,GO:0010121,GO:0055129	cytoplasm|mitochondrial matrix|mitochondrion|nucleoplasm|identical protein binding|ornithine(lysine) transaminase activity|ornithine-oxo-acid transaminase activity|pyridoxal phosphate binding|arginine catabolic process to glutamate|arginine catabolic process to proline via ornithine|L-proline biosynthetic process	mmu00330	Arginine and proline metabolism	KOG1402	[E]	Ornithine aminotransferase	Amino acid transport and metabolism	KOG1402	E	ornithine-oxo-acid transaminase activity	Amino acid transport and metabolism	PF00202	Aminotran_3	Aminotransferase class-III
P30285	Cdk4	12567	Cyclin-dependent kinase 4	GO:0005923,GO:0000785,GO:0097129,GO:0000307,GO:0005737,GO:0005829,GO:0016592,GO:0031965,GO:0005730,GO:0005654,GO:0005634,GO:0048471,GO:0032991,GO:0005667,GO:0005524,GO:0030332,GO:0004693,GO:0016301,GO:0004672,GO:0106310,GO:0004674,GO:0106311,GO:0044877,GO:0008353,GO:0060612,GO:0031100,GO:0051301,GO:0032869,GO:0071353,GO:1904637,GO:0071222,GO:1904628,GO:0007623,GO:0000082,GO:0002088,GO:0043065,GO:…	bicellular tight junction|chromatin|cyclin D2-CDK4 complex|cyclin-dependent protein kinase holoenzyme complex|cytoplasm|cytosol|mediator complex|nuclear membrane|nucleolus|nucleoplasm|nucleus|perinuclear region of cytoplasm|protein-containing complex|transcription regulator complex|ATP binding|cyclin binding|cyclin-dependent protein serine/threonine kinase activity|kinase activity|protein kinase …	mmu04151,mmu04110,mmu04115,mmu04218,mmu04530,mmu04660,mmu05200,mmu05203,mmu05212,mmu05225,mmu05214,mmu05220,mmu05218,mmu05219,mmu05224,mmu05222,mmu05223,mmu05166,mmu05160,mmu05164,mmu05162,mmu05163,mmu05167,mmu05169,mmu05165,mmu04933,mmu04934,mmu01522	PI3K-Akt signaling pathway|Cell cycle|p53 signaling pathway|Cellular senescence|Tight junction|T cell receptor signaling pathway|Pathways in cancer|Viral carcinogenesis|Pancreatic cancer|Hepatocellular carcinoma|Glioma|Chronic myeloid leukemia|Melanoma|Bladder cancer|Breast cancer|Small cell lung cancer|Non-small cell lung cancer|Human T-cell leukemia virus 1 infection|Hepatitis C|Influenza A|Mea…	KOG0594	[R]	Protein kinase PCTAIRE and related kinases	General function prediction only	KOG0594	G	cyclin-dependent protein serine/threonine kinase activity	Carbohydrate transport and metabolism	PF00069	Pkinase	Protein kinase domain
P30412	Ppic	19038	Peptidyl-prolyl cis-trans isomerase C	GO:0005737,GO:0043231,GO:0016018,GO:0003755,GO:0006457,GO:0000413	cytoplasm|intracellular membrane-bounded organelle|cyclosporin A binding|peptidyl-prolyl cis-trans isomerase activity|protein folding|protein peptidyl-prolyl isomerization			KOG0880	[O]	Peptidyl-prolyl cis-trans isomerase	Posttranslational modification, protein turnover, chaperones	KOG0880	O	peptidyl-prolyl cis-trans isomerase activity	Posttranslational modification, protein turnover, chaperones	PF00160	Pro_isomerase	Cyclophilin type peptidyl-prolyl cis-trans isomerase/CLD
P30416	Fkbp4	14228	Peptidyl-prolyl cis-trans isomerase FKBP4	GO:0044295,GO:0005737,GO:0005829,GO:0005874,GO:0005739,GO:0043005,GO:0043025,GO:0005654,GO:0005634,GO:0048471,GO:0032991,GO:0005524,GO:0032767,GO:0005528,GO:0035259,GO:0005525,GO:0031072,GO:0003755,GO:0051219,GO:0048156,GO:0030521,GO:0061077,GO:0006825,GO:0007566,GO:0046661,GO:0031115,GO:0031111,GO:0010977,GO:0030850,GO:0000413,GO:0031503,GO:0048608,GO:0006463	axonal growth cone|cytoplasm|cytosol|microtubule|mitochondrion|neuron projection|neuronal cell body|nucleoplasm|nucleus|perinuclear region of cytoplasm|protein-containing complex|ATP binding|copper-dependent protein binding|FK506 binding|glucocorticoid receptor binding|GTP binding|heat shock protein binding|peptidyl-prolyl cis-trans isomerase activity|phosphoprotein binding|tau protein binding|an…	mmu04915	Estrogen signaling pathway	KOG0543	[O]	FKBP-type peptidyl-prolyl cis-trans isomerase	Posttranslational modification, protein turnover, chaperones	KOG0543	O	FK506 binding	Posttranslational modification, protein turnover, chaperones	PF00254	FKBP_C	FKBP-type peptidyl-prolyl cis-trans isomerase
P30681	Hmgb2	97165	High mobility group protein B2	GO:0000785,GO:0000793,GO:0005737,GO:0005615,GO:0005730,GO:0005654,GO:0005634,GO:0048471,GO:0032991,GO:0042056,GO:0000987,GO:0003684,GO:0003677,GO:0008301,GO:0003690,GO:0044378,GO:0019904,GO:0050786,GO:0097100,GO:0000976,GO:0003713,GO:0008134,GO:0060326,GO:0071222,GO:0050829,GO:0050830,GO:0006310,GO:0006265,GO:0002437,GO:0045087,GO:0008584,GO:1902042,GO:0010629,GO:0045892,GO:0043388,GO:0001938,GO:…	chromatin|condensed chromosome|cytoplasm|extracellular space|nucleolus|nucleoplasm|nucleus|perinuclear region of cytoplasm|protein-containing complex|chemoattractant activity|cis-regulatory region sequence-specific DNA binding|damaged DNA binding|DNA binding|DNA binding, bending|double-stranded DNA binding|non-sequence-specific DNA binding, bending|protein domain specific binding|RAGE receptor bi…			KOG0381	[R]	HMG box-containing protein	General function prediction only	KOG0381	B	DNA binding	Chromatin structure and dynamics	PF00505	HMG_box	HMG (high mobility group) box
P30999	Ctnnd1	12388	Catenin delta-1	GO:0005912,GO:0016327,GO:0005923,GO:0016342,GO:0005911,GO:0005737,GO:0005829,GO:0043197,GO:0016600,GO:0098978,GO:0030426,GO:0098686,GO:0030027,GO:0016020,GO:0030496,GO:0005634,GO:0005886,GO:0099092,GO:0098831,GO:0098685,GO:0045202,GO:0005915,GO:0045296,GO:0050839,GO:0019904,GO:0019901,GO:0019903,GO:0005102,GO:0007155,GO:0098609,GO:0044331,GO:0007043,GO:0060690,GO:0072102,GO:0001822,GO:0001738,GO:…	adherens junction|apicolateral plasma membrane|bicellular tight junction|catenin complex|cell-cell junction|cytoplasm|cytosol|dendritic spine|flotillin complex|glutamatergic synapse|growth cone|hippocampal mossy fiber to CA3 synapse|lamellipodium|membrane|midbody|nucleus|plasma membrane|postsynaptic density, intracellular component|presynaptic active zone cytoplasmic component|Schaffer collateral…	mmu04015,mmu04520,mmu04670	Rap1 signaling pathway|Adherens junction|Leukocyte transendothelial migration	KOG1048	[TW]	Neural adherens junction protein Plakophilin and related Armadillo repeat proteins	Signal transduction mechanisms |Extracellular structures	KOG1048	M	cell-cell adhesion	Cell wall/membrane/envelope biogenesis	PF00514	Arm	Armadillo/beta-catenin-like repeat
P31230	Aimp1	13722	Aminoacyl tRNA synthase complex-interacting multifunctional protein 1	GO:0017101,GO:0009986,GO:0005829,GO:0005783,GO:0005615,GO:0005794,GO:0005634,GO:0005125,GO:0051020,GO:0042803,GO:0000049,GO:0001525,GO:0006915,GO:0007267,GO:0006954,GO:0050900,GO:0001937,GO:0070094,GO:0006412	aminoacyl-tRNA synthetase multienzyme complex|cell surface|cytosol|endoplasmic reticulum|extracellular space|Golgi apparatus|nucleus|cytokine activity|GTPase binding|protein homodimerization activity|tRNA binding|angiogenesis|apoptotic process|cell-cell signaling|inflammatory response|leukocyte migration|negative regulation of endothelial cell proliferation|positive regulation of glucagon secreti…			KOG2241	[J]	tRNA-binding protein	Translation, ribosomal structure and biogenesis	KOG2241	J	tRNA binding	Translation, ribosomal structure and biogenesis	PF01588	tRNA_bind	Putative tRNA binding domain
P31266	Rbpj	19664	Recombining binding protein suppressor of hairless	GO:0005737,GO:0002193,GO:0005730,GO:0005654,GO:0005634,GO:0032991,GO:0032993,GO:0005667,GO:0017053,GO:0003682,GO:0003677,GO:0001228,GO:0000981,GO:0140297,GO:0047485,GO:0044877,GO:0000978,GO:0061629,GO:0043565,GO:0001525,GO:0003176,GO:0060844,GO:0048844,GO:0036302,GO:0009912,GO:0030183,GO:0097101,GO:0072554,GO:0001974,GO:0003214,GO:0045165,GO:0060486,GO:0042742,GO:0061371,GO:0035912,GO:0003157,GO:…	cytoplasm|MAML1-RBP-Jkappa- ICN1 complex|nucleolus|nucleoplasm|nucleus|protein-containing complex|protein-DNA complex|transcription regulator complex|transcription repressor complex|chromatin binding|DNA binding|DNA-binding transcription activator activity, RNA polymerase II-specific|DNA-binding transcription factor activity, RNA polymerase II-specific|DNA-binding transcription factor binding|pro…	mmu04330,mmu04658,mmu05203,mmu05169,mmu05165,mmu05017	Notch signaling pathway|Th1 and Th2 cell differentiation|Viral carcinogenesis|Epstein-Barr virus infection|Human papillomavirus infection|Spinocerebellar ataxia	KOG3743	[K]	Recombination signal binding protein-J kappa(CBF1, Su(H), HS2NF5)	Transcription	KOG3743	L	positive regulation of canonical Wnt signaling pathway involved in cardiac muscle cell fate commitment	Replication, recombination and repair	PF09270	BTD	Beta-trefoil DNA-binding domain
P31324	Prkar2b	19088	cAMP-dependent protein kinase type II-beta regulatory subunit	GO:0005952,GO:0005813,GO:0097546,GO:0005737,GO:0030425,GO:0043198,GO:0043197,GO:0098978,GO:0045121,GO:0043025,GO:0048471,GO:0005886,GO:0098794,GO:0030552,GO:0004862,GO:0008603,GO:0019904,GO:0034236,GO:0019901,GO:0031625,GO:0006631,GO:0007612,GO:0050804,GO:2000480,GO:0043949,GO:0010738,GO:0045859,GO:0097332,GO:0097338	cAMP-dependent protein kinase complex|centrosome|ciliary base|cytoplasm|dendrite|dendritic shaft|dendritic spine|glutamatergic synapse|membrane raft|neuronal cell body|perinuclear region of cytoplasm|plasma membrane|postsynapse|cAMP binding|cAMP-dependent protein kinase inhibitor activity|cAMP-dependent protein kinase regulator activity|protein domain specific binding|protein kinase A catalytic s…	mmu04910	Insulin signaling pathway	KOG1113	[T]	cAMP-dependent protein kinase types I and II, regulatory subunit	Signal transduction mechanisms	KOG1113	T	cAMP-dependent protein kinase regulator activity	Signal transduction mechanisms	PF00027	cNMP_binding	Cyclic nucleotide-binding domain
P31786	Dbi	13167	Acyl-CoA-binding protein	GO:0043292,GO:0005737,GO:0005615,GO:0005794,GO:0005739,GO:0005634,GO:0097038,GO:0005886,GO:0032994,GO:0008021,GO:0030156,GO:0000062,GO:0042802,GO:0008289,GO:0036042,GO:0001662,GO:0014009,GO:0001942,GO:0021670,GO:0007611,GO:0060291,GO:0031999,GO:1903060,GO:0036151,GO:1905920,GO:0046889,GO:2001140,GO:0051281,GO:0032228,GO:0043588,GO:0006641	contractile fiber|cytoplasm|extracellular space|Golgi apparatus|mitochondrion|nucleus|perinuclear endoplasmic reticulum|plasma membrane|protein-lipid complex|synaptic vesicle|benzodiazepine receptor binding|fatty-acyl-CoA binding|identical protein binding|lipid binding|long-chain fatty acyl-CoA binding|behavioral fear response|glial cell proliferation|hair follicle development|lateral ventricle d…	mmu03320	PPAR signaling pathway	KOG0817	[I]	Acyl-CoA-binding protein	Lipid transport and metabolism	KOG0817	I	fatty-acyl-CoA binding	Lipid transport and metabolism	PF00887	ACBP	Acyl CoA binding protein
P31938	Map2k1	26395	Dual specificity mitogen-activated protein kinase kinase 1	GO:0030424,GO:0005938,GO:0005829,GO:0030425,GO:0032839,GO:0005769,GO:0005783,GO:0005925,GO:0098978,GO:0005794,GO:0005770,GO:0005815,GO:0005739,GO:0005634,GO:0043204,GO:0048471,GO:0005886,GO:0014069,GO:0005524,GO:0004708,GO:0005078,GO:0031435,GO:0008022,GO:0019901,GO:0047485,GO:0106310,GO:0043539,GO:0004674,GO:0004712,GO:0106311,GO:0044877,GO:0097110,GO:0031267,GO:0004714,GO:0000187,GO:0060020,GO:…	axon|cell cortex|cytosol|dendrite|dendrite cytoplasm|early endosome|endoplasmic reticulum|focal adhesion|glutamatergic synapse|Golgi apparatus|late endosome|microtubule organizing center|mitochondrion|nucleus|perikaryon|perinuclear region of cytoplasm|plasma membrane|postsynaptic density|ATP binding|MAP kinase kinase activity|MAP-kinase scaffold activity|mitogen-activated protein kinase kinase ki…	mmu04010,mmu04012,mmu04014,mmu04015,mmu04370,mmu04371,mmu04668,mmu04066,mmu04068,mmu04072,mmu04071,mmu04024,mmu04022,mmu04151,mmu04150,mmu04140,mmu04114,mmu04210,mmu04218,mmu04510,mmu04540,mmu04550,mmu04810,mmu04613,mmu04620,mmu04650,mmu04660,mmu04662,mmu04664,mmu04666,mmu04062,mmu04910,mmu04929,mmu04912,mmu04915,mmu04914,mmu04917,mmu04921,mmu04926,mmu04935,mmu04919,mmu04928,mmu04916,mmu04270,mmu…	MAPK signaling pathway|ErbB signaling pathway|Ras signaling pathway|Rap1 signaling pathway|VEGF signaling pathway|Apelin signaling pathway|TNF signaling pathway|HIF-1 signaling pathway|FoxO signaling pathway|Phospholipase D signaling pathway|Sphingolipid signaling pathway|cAMP signaling pathway|cGMP-PKG signaling pathway|PI3K-Akt signaling pathway|mTOR signaling pathway|Autophagy - animal|Oocyte …	KOG0581	[T]	Mitogen-activated protein kinase kinase (MAP2K)	Signal transduction mechanisms	KOG0581	G	MAP kinase kinase activity	Carbohydrate transport and metabolism	PF00069	Pkinase	Protein kinase domain
P32020	Scp2	20280	Sterol carrier protein 2	GO:0005737,GO:0005829,GO:0005783,GO:0019898,GO:0031315,GO:0043231,GO:0016020,GO:0005739,GO:0005654,GO:0005634,GO:0005782,GO:0005777,GO:0032991,GO:0003988,GO:0050633,GO:0015485,GO:0120020,GO:0000062,GO:0042802,GO:0036042,GO:0070538,GO:0120019,GO:1904121,GO:0008526,GO:0033814,GO:0050632,GO:0044877,GO:0005102,GO:0032934,GO:0006637,GO:0007568,GO:0008206,GO:0006635,GO:0032959,GO:0032367,GO:1901373,GO:…	cytoplasm|cytosol|endoplasmic reticulum|extrinsic component of membrane|extrinsic component of mitochondrial outer membrane|intracellular membrane-bounded organelle|membrane|mitochondrion|nucleoplasm|nucleus|peroxisomal matrix|peroxisome|protein-containing complex|acetyl-CoA C-acyltransferase activity|acetyl-CoA C-myristoyltransferase activity|cholesterol binding|cholesterol transfer activity|fat…	mmu00120,mmu01040,mmu04146,mmu03320	Primary bile acid biosynthesis|Biosynthesis of unsaturated fatty acids|Peroxisome|PPAR signaling pathway	KOG1406	[I]	Peroxisomal 3-ketoacyl-CoA-thiolase P-44/SCP2	Lipid transport and metabolism	KOG1406	I	propanoyl-CoA C-acyltransferase activity	Lipid transport and metabolism	PF00108	Thiolase_N	Thiolase, N-terminal domain
P32067	Ssb	20823	Lupus La protein homolog	GO:0005737,GO:0005634,GO:1990904,GO:0008266,GO:0003723,GO:1990825,GO:0000049,GO:0075522,GO:0071045,GO:1903608,GO:0042780,GO:0001682,GO:0006409,GO:0008033	cytoplasm|nucleus|ribonucleoprotein complex|poly(U) RNA binding|RNA binding|sequence-specific mRNA binding|tRNA binding|IRES-dependent viral translational initiation|nuclear histone mRNA catabolic process|protein localization to cytoplasmic stress granule|tRNA 3'-end processing|tRNA 5'-leader removal|tRNA export from nucleus|tRNA processing	mmu05322	Systemic lupus erythematosus	KOG4213	[A]	RNA-binding protein La	RNA processing and modification	KOG4213	J	nuclear histone mRNA catabolic process	Translation, ribosomal structure and biogenesis	PF00076	RRM_1	RNA recognition motif. (a.k.a. RRM, RBD, or RNP domain)
P32233	Drg1	13494	Developmentally-regulated GTP-binding protein 1	GO:0005737,GO:0005829,GO:0016604,GO:0005634,GO:0005844,GO:0005525,GO:0003924,GO:0042802,GO:0008017,GO:0030955,GO:0002181,GO:0031116,GO:1901673	cytoplasm|cytosol|nuclear body|nucleus|polysome|GTP binding|GTPase activity|identical protein binding|microtubule binding|potassium ion binding|cytoplasmic translation|positive regulation of microtubule polymerization|regulation of mitotic spindle assembly			KOG1487	[T]	GTP-binding protein DRG1 (ODN superfamily)	Signal transduction mechanisms	KOG1487	Z	GTP-binding protein	Cytoskeleton	PF01926	MMR_HSR1	50S ribosome-binding GTPase
P32261	Serpinc1	11905	Antithrombin-III	GO:0062023,GO:0005615,GO:0008201,GO:0042802,GO:0002020,GO:0004867,GO:0002438,GO:0007596,GO:0007595,GO:0010951,GO:2000266,GO:0007584	collagen-containing extracellular matrix|extracellular space|heparin binding|identical protein binding|protease binding|serine-type endopeptidase inhibitor activity|acute inflammatory response to antigenic stimulus|blood coagulation|lactation|negative regulation of endopeptidase activity|regulation of blood coagulation, intrinsic pathway|response to nutrient	mmu04610	Complement and coagulation cascades	KOG2392	[V]	Serpin	Defense mechanisms	KOG2392	O	serine-type endopeptidase inhibitor activity	Posttranslational modification, protein turnover, chaperones	PF00079	Serpin	Serpin (serine protease inhibitor)
P32921	Wars1	22375	Tryptophan--tRNA ligase, cytoplasmic	GO:0005737,GO:0005829,GO:0005634,GO:0032991,GO:0005524,GO:0019210,GO:0019904,GO:0042803,GO:0019901,GO:0004830,GO:0001525,GO:0006469,GO:0001933,GO:0010628,GO:0031334,GO:0045765,GO:0010835,GO:0006436	cytoplasm|cytosol|nucleus|protein-containing complex|ATP binding|kinase inhibitor activity|protein domain specific binding|protein homodimerization activity|protein kinase binding|tryptophan-tRNA ligase activity|angiogenesis|negative regulation of protein kinase activity|negative regulation of protein phosphorylation|positive regulation of gene expression|positive regulation of protein-containing…	mmu00970	Aminoacyl-tRNA biosynthesis	KOG2145	[J]	Cytoplasmic tryptophanyl-tRNA synthetase	Translation, ribosomal structure and biogenesis	KOG2145	J	tryptophanyl-tRNA aminoacylation	Translation, ribosomal structure and biogenesis	PF00458	WHEP-TRS	WHEP-TRS domain
P34022	Ranbp1	19385	Ran-specific GTPase-activating protein	GO:1904115,GO:0005813,GO:0005737,GO:0005829,GO:0005643,GO:0005634,GO:0032838,GO:0005092,GO:0005096,GO:0035690,GO:0072750,GO:0046907,GO:0046604,GO:0010976,GO:0051592,GO:0007051	axon cytoplasm|centrosome|cytoplasm|cytosol|nuclear pore|nucleus|plasma membrane bounded cell projection cytoplasm|GDP-dissociation inhibitor activity|GTPase activator activity|cellular response to drug|cellular response to leptomycin B|intracellular transport|positive regulation of mitotic centrosome separation|positive regulation of neuron projection development|response to calcium ion|spindle …	mmu05203,mmu05166	Viral carcinogenesis|Human T-cell leukemia virus 1 infection	KOG0864	[U]	Ran-binding protein RANBP1 and related RanBD domain proteins	Intracellular trafficking, secretion, and vesicular transport	KOG0864	U	Ran GTPase binding	Intracellular trafficking, secretion, and vesicular transport	PF00638	Ran_BP1	RanBP1 domain
P34152	Ptk2	14083	Focal adhesion kinase 1	GO:0016324,GO:0016323,GO:0036064,GO:0005737,GO:0005829,GO:0043197,GO:0031234,GO:0005925,GO:0098978,GO:0014704,GO:0043231,GO:0030027,GO:0016604,GO:0005730,GO:0005634,GO:0048471,GO:0005886,GO:0098794,GO:0042383,GO:0001725,GO:0003779,GO:0005524,GO:0042802,GO:0005178,GO:0008432,GO:0004715,GO:0019902,GO:0043548,GO:0019901,GO:0019903,GO:0004713,GO:0044877,GO:0042169,GO:0005102,GO:0004714,GO:0031625,GO:…	apical plasma membrane|basolateral plasma membrane|ciliary basal body|cytoplasm|cytosol|dendritic spine|extrinsic component of cytoplasmic side of plasma membrane|focal adhesion|glutamatergic synapse|intercalated disc|intracellular membrane-bounded organelle|lamellipodium|nuclear body|nucleolus|nucleus|perinuclear region of cytoplasm|plasma membrane|postsynapse|sarcolemma|stress fiber|actin bindi…	mmu04012,mmu04370,mmu04151,mmu04510,mmu04810,mmu04670,mmu04062,mmu04935,mmu04360,mmu05200,mmu05202,mmu05205,mmu05208,mmu05222,mmu05170,mmu05163,mmu05165,mmu05135,mmu05100,mmu05146,mmu05417,mmu05418,mmu01522	ErbB signaling pathway|VEGF signaling pathway|PI3K-Akt signaling pathway|Focal adhesion|Regulation of actin cytoskeleton|Leukocyte transendothelial migration|Chemokine signaling pathway|Growth hormone synthesis, secretion and action|Axon guidance|Pathways in cancer|Transcriptional misregulation in cancer|Proteoglycans in cancer|Chemical carcinogenesis - reactive oxygen species|Small cell lung can…	KOG4257	[T]	Focal adhesion tyrosine kinase FAK, contains FERM domain	Signal transduction mechanisms	KOG4257	K	signal complex assembly	Transcription	PF00373	FERM_M	FERM central domain
P34884	Mif	17319	Macrophage migration inhibitory factor	GO:0009986,GO:0005737,GO:0005829,GO:0005576,GO:0005615,GO:0043209,GO:0005654,GO:0005634,GO:0005886,GO:0042056,GO:0005125,GO:0005126,GO:0004167,GO:0042802,GO:0050178,GO:0002020,GO:0044877,GO:0002035,GO:0019752,GO:0007569,GO:0007166,GO:0030330,GO:0042756,GO:0006954,GO:0045087,GO:0043066,GO:0090344,GO:0030336,GO:0032269,GO:0043518,GO:0010629,GO:1902166,GO:0010760,GO:0002906,GO:0033033,GO:0002675,GO:…	cell surface|cytoplasm|cytosol|extracellular region|extracellular space|myelin sheath|nucleoplasm|nucleus|plasma membrane|chemoattractant activity|cytokine activity|cytokine receptor binding|dopachrome isomerase activity|identical protein binding|phenylpyruvate tautomerase activity|protease binding|protein-containing complex binding|brain renin-angiotensin system|carboxylic acid metabolic process…	mmu00350,mmu00360	Tyrosine metabolism|Phenylalanine metabolism	KOG1759	[V]	Macrophage migration inhibitory factor	Defense mechanisms	KOG1759	O	phenylpyruvate tautomerase activity	Posttranslational modification, protein turnover, chaperones	PF01187	MIF	Macrophage migration inhibitory factor (MIF)
P35235	Ptpn11	19247	Tyrosine-protein phosphatase non-receptor type 11	GO:0005737,GO:0005829,GO:0005739,GO:0005634,GO:0005886,GO:0044853,GO:0032991,GO:0045296,GO:0050839,GO:0031748,GO:0005158,GO:0043560,GO:0004726,GO:0051428,GO:0043274,GO:0004721,GO:0001784,GO:0019904,GO:0019901,GO:1990782,GO:0004725,GO:0030971,GO:0030159,GO:0033277,GO:0036302,GO:0007409,GO:0060020,GO:0007420,GO:1904385,GO:0071364,GO:0070301,GO:1990314,GO:0071260,GO:0021697,GO:0000077,GO:0048013,GO:…	cytoplasm|cytosol|mitochondrion|nucleus|plasma membrane|plasma membrane raft|protein-containing complex|cadherin binding|cell adhesion molecule binding|D1 dopamine receptor binding|insulin receptor binding|insulin receptor substrate binding|non-membrane spanning protein tyrosine phosphatase activity|peptide hormone receptor binding|phospholipase binding|phosphoprotein phosphatase activity|phospho…	mmu04014,mmu04630,mmu04072,mmu04625,mmu04650,mmu04670,mmu04920,mmu04722,mmu04360,mmu05205,mmu05208,mmu05235,mmu05220,mmu05211,mmu05168,mmu04931	Ras signaling pathway|JAK-STAT signaling pathway|Phospholipase D signaling pathway|C-type lectin receptor signaling pathway|Natural killer cell mediated cytotoxicity|Leukocyte transendothelial migration|Adipocytokine signaling pathway|Neurotrophin signaling pathway|Axon guidance|Proteoglycans in cancer|Chemical carcinogenesis - reactive oxygen species|PD-L1 expression and PD-1 checkpoint pathway …	KOG0790	[T]	Protein tyrosine phosphatase Corkscrew and related SH2 domain enzymes	Signal transduction mechanisms	KOG0790	T	abortive mitotic cell cycle	Signal transduction mechanisms	PF00017	SH2	SH2 domain
P35278	Rab5c	19345	Ras-related protein Rab-5C	GO:0098993,GO:0005769,GO:0031901,GO:0030139,GO:0012505,GO:0005768,GO:0005811,GO:0042470,GO:0005886,GO:0003925,GO:0019003,GO:0005525,GO:0003924,GO:0006897,GO:0007032,GO:0006886,GO:0048227,GO:0030100	anchored component of synaptic vesicle membrane|early endosome|early endosome membrane|endocytic vesicle|endomembrane system|endosome|lipid droplet|melanosome|plasma membrane|G protein activity|GDP binding|GTP binding|GTPase activity|endocytosis|endosome organization|intracellular protein transport|plasma membrane to endosome transport|regulation of endocytosis	mmu04014,mmu04144,mmu04145,mmu04962,mmu05132,mmu05152,mmu05146	Ras signaling pathway|Endocytosis|Phagosome|Vasopressin-regulated water reabsorption|Salmonella infection|Tuberculosis|Amoebiasis	KOG0092	[U]	GTPase Rab5/YPT51 and related small G protein superfamily GTPases	Intracellular trafficking, secretion, and vesicular transport	KOG0092	C	member Ras oncogene family	Energy production and conversion	PF00071	Ras	Ras family
P35279	Rab6a	19346	Ras-related protein Rab-6A	GO:0031410,GO:0005829,GO:0012505,GO:0070381,GO:0005794,GO:0000139,GO:0016020,GO:0098793,GO:0005802,GO:0001671,GO:0051117,GO:0005525,GO:0003924,GO:0031489,GO:0019904,GO:0047485,GO:0019882,GO:0034498,GO:0006891,GO:0006886,GO:0018125,GO:0034067,GO:0042147,GO:0006890	cytoplasmic vesicle|cytosol|endomembrane system|endosome to plasma membrane transport vesicle|Golgi apparatus|Golgi membrane|membrane|presynapse|trans-Golgi network|ATPase activator activity|ATPase binding|GTP binding|GTPase activity|myosin V binding|protein domain specific binding|protein N-terminus binding|antigen processing and presentation|early endosome to Golgi transport|intra-Golgi vesicle…			KOG0094	[U]	GTPase Rab6/YPT6/Ryh1, small G protein superfamily	Intracellular trafficking, secretion, and vesicular transport	KOG0094	B	GTPase activity	Chromatin structure and dynamics	PF00071	Ras	Ras family
P35282	Rab21	216344	Ras-related protein Rab-21	GO:1904115,GO:0032154,GO:0098559,GO:0009898,GO:0005769,GO:0012505,GO:0005789,GO:0005768,GO:0032580,GO:0043005,GO:0045202,GO:0005802,GO:0012506,GO:0019003,GO:0005525,GO:0003924,GO:0008089,GO:0006886,GO:0050775,GO:2000643,GO:0048260,GO:0050821,GO:0032482,GO:0030516,GO:0017157	axon cytoplasm|cleavage furrow|cytoplasmic side of early endosome membrane|cytoplasmic side of plasma membrane|early endosome|endomembrane system|endoplasmic reticulum membrane|endosome|Golgi cisterna membrane|neuron projection|synapse|trans-Golgi network|vesicle membrane|GDP binding|GTP binding|GTPase activity|anterograde axonal transport|intracellular protein transport|positive regulation of de…			KOG0088	[R]	GTPase Rab21, small G protein superfamily	General function prediction only	KOG0088	E	GTPase activity	Amino acid transport and metabolism	PF00071	Ras	Ras family
P35285	Rab22a	19334	Ras-related protein Rab-22A	GO:0015629,GO:0005769,GO:0012505,GO:0010008,GO:0005770,GO:0045335,GO:0030670,GO:0005886,GO:0001726,GO:0019003,GO:0005525,GO:0003924,GO:0006897,GO:0007032,GO:0006886,GO:0097494	actin cytoskeleton|early endosome|endomembrane system|endosome membrane|late endosome|phagocytic vesicle|phagocytic vesicle membrane|plasma membrane|ruffle|GDP binding|GTP binding|GTPase activity|endocytosis|endosome organization|intracellular protein transport|regulation of vesicle size	mmu04144	Endocytosis	KOG0092	[U]	GTPase Rab5/YPT51 and related small G protein superfamily GTPases	Intracellular trafficking, secretion, and vesicular transport	KOG0092	S	GTPase activity	Function unknown	PF00071	Ras	Ras family
P35288	Rab23	19335	Ras-related protein Rab-23	GO:0005776,GO:0030054,GO:0005813,GO:0005737,GO:0005829,GO:0012505,GO:0010008,GO:0045335,GO:0030670,GO:0005886,GO:0005525,GO:0003924,GO:0000045,GO:0006968,GO:0060271,GO:0097094,GO:0021904,GO:0042733,GO:0046039,GO:0006886,GO:0042308,GO:0045861,GO:0007399,GO:0001843,GO:0008589,GO:0007165,GO:0021513	autophagosome|cell junction|centrosome|cytoplasm|cytosol|endomembrane system|endosome membrane|phagocytic vesicle|phagocytic vesicle membrane|plasma membrane|GTP binding|GTPase activity|autophagosome assembly|cellular defense response|cilium assembly|craniofacial suture morphogenesis|dorsal/ventral neural tube patterning|embryonic digit morphogenesis|GTP metabolic process|intracellular protein tr…			KOG4252	[T]	GTP-binding protein	Signal transduction mechanisms	KOG4252	S	GTPase activity	Function unknown	PF00071	Ras	Ras family
P35293	Rab18	19330	Ras-related protein Rab-18	GO:0016324,GO:0012505,GO:0071782,GO:0005794,GO:0005811,GO:0045202,GO:0019003,GO:0005525,GO:0003924,GO:0007420,GO:0071786,GO:0001654,GO:0051170,GO:0006886,GO:0034389	apical plasma membrane|endomembrane system|endoplasmic reticulum tubular network|Golgi apparatus|lipid droplet|synapse|GDP binding|GTP binding|GTPase activity|brain development|endoplasmic reticulum tubular network organization|eye development|import into nucleus|intracellular protein transport|lipid droplet organization			KOG0080	[R]	GTPase Rab18, small G protein superfamily	General function prediction only	KOG0080	S	myosin XI tail binding	Function unknown	PF00071	Ras	Ras family
P35441	Thbs1	21825	Thrombospondin-1	GO:0009986,GO:0062023,GO:0005737,GO:0005783,GO:0009897,GO:0031012,GO:0005615,GO:0005577,GO:0031091,GO:0016529,GO:0030141,GO:0005509,GO:0070052,GO:0050840,GO:0070051,GO:0017134,GO:0001968,GO:0008201,GO:0005178,GO:0043236,GO:0030169,GO:0001786,GO:0050431,GO:0000187,GO:0048266,GO:0048514,GO:0016477,GO:0071732,GO:0003197,GO:0043652,GO:0003417,GO:0006954,GO:0070487,GO:0016525,GO:0002581,GO:0043066,GO:…	cell surface|collagen-containing extracellular matrix|cytoplasm|endoplasmic reticulum|external side of plasma membrane|extracellular matrix|extracellular space|fibrinogen complex|platelet alpha granule|sarcoplasmic reticulum|secretory granule|calcium ion binding|collagen V binding|extracellular matrix binding|fibrinogen binding|fibroblast growth factor binding|fibronectin binding|heparin binding|…	mmu04015,mmu04350,mmu04151,mmu04512,mmu04145,mmu04115,mmu04510,mmu05206,mmu05205,mmu05219,mmu05165,mmu05144	Rap1 signaling pathway|TGF-beta signaling pathway|PI3K-Akt signaling pathway|ECM-receptor interaction|Phagosome|p53 signaling pathway|Focal adhesion|MicroRNAs in cancer|Proteoglycans in cancer|Bladder cancer|Human papillomavirus infection|Malaria					ENOG502QRK8	O	heparin binding	Posttranslational modification, protein turnover, chaperones	PF00093	VWC	von Willebrand factor type C domain
P35456	Plaur	18793	Urokinase plasminogen activator surface receptor	GO:0031225,GO:0009986,GO:0005576,GO:0005887,GO:0005886,GO:0019899,GO:0019904,GO:0005102,GO:0030377,GO:0060742,GO:0048762,GO:0043066,GO:2001268,GO:2001243,GO:0043388,GO:0045742,GO:0034112,GO:0001934,GO:0090200	anchored component of membrane|cell surface|extracellular region|integral component of plasma membrane|plasma membrane|enzyme binding|protein domain specific binding|signaling receptor binding|urokinase plasminogen activator receptor activity|epithelial cell differentiation involved in prostate gland development|mesenchymal cell differentiation|negative regulation of apoptotic process|negative re…	mmu04610,mmu05205	Complement and coagulation cascades|Proteoglycans in cancer					ENOG502S36D	S	urokinase plasminogen activator receptor activity	Function unknown	PF00021	UPAR_LY6	u-PAR/Ly-6 domain
P35486	Pdha1	18597	Pyruvate dehydrogenase E1 component subunit alpha, somatic form, mitochondrial	GO:0005759,GO:0005739,GO:0043209,GO:0005730,GO:0045254,GO:0004739,GO:0034604,GO:0004738,GO:0006086,GO:0006006,GO:0061732,GO:0006099	mitochondrial matrix|mitochondrion|myelin sheath|nucleolus|pyruvate dehydrogenase complex|pyruvate dehydrogenase (acetyl-transferring) activity|pyruvate dehydrogenase (NAD+) activity|pyruvate dehydrogenase activity|acetyl-CoA biosynthetic process from pyruvate|glucose metabolic process|mitochondrial acetyl-CoA biosynthetic process from pyruvate|tricarboxylic acid cycle	mmu00010,mmu00020,mmu00620,mmu04066,mmu04922,mmu05230,mmu05415	Glycolysis / Gluconeogenesis|Citrate cycle (TCA cycle)|Pyruvate metabolism|HIF-1 signaling pathway|Glucagon signaling pathway|Central carbon metabolism in cancer|Diabetic cardiomyopathy	KOG0225	[C]	Pyruvate dehydrogenase E1, alpha subunit	Energy production and conversion	KOG0225	C	pyruvate dehydrogenase (acetyl-transferring) activity	Energy production and conversion	PF00676	E1_dh	Dehydrogenase E1 component
P35550	Fbl	14113	rRNA 2'-O-methyltransferase fibrillarin	GO:0031428,GO:0015030,GO:0005694,GO:0001651,GO:0001650,GO:0001652,GO:0005730,GO:0005654,GO:0005634,GO:0032040,GO:0051117,GO:1990259,GO:0003723,GO:0008649,GO:0001094,GO:0000494,GO:1990258,GO:0031167,GO:0016074,GO:0048254	box C/D RNP complex|Cajal body|chromosome|dense fibrillar component|fibrillar center|granular component|nucleolus|nucleoplasm|nucleus|small-subunit processome|ATPase binding|histone-glutamine methyltransferase activity|RNA binding|rRNA methyltransferase activity|TFIID-class transcription factor complex binding|box C/D RNA 3'-end processing|histone glutamine methylation|rRNA methylation|sno(s)RNA …	mmu03008	Ribosome biogenesis in eukaryotes	KOG1596	[A]	Fibrillarin and related nucleolar RNA-binding proteins	RNA processing and modification	KOG1596	J	histone-glutamine methyltransferase activity	Translation, ribosomal structure and biogenesis	PF01269	Fibrillarin	Fibrillarin
P35564	Canx	12330	Calnexin	GO:0030424,GO:0005737,GO:0032839,GO:0043197,GO:0005783,GO:0005789,GO:0044322,GO:0098978,GO:0071556,GO:0016021,GO:0099055,GO:0099059,GO:0042470,GO:0016020,GO:0044233,GO:0043209,GO:0043025,GO:0032991,GO:0005840,GO:0005791,GO:0005790,GO:0034185,GO:0005509,GO:0030246,GO:0035255,GO:0051082,GO:0007568,GO:0072583,GO:0030968,GO:0006457,GO:0048488	axon|cytoplasm|dendrite cytoplasm|dendritic spine|endoplasmic reticulum|endoplasmic reticulum membrane|endoplasmic reticulum quality control compartment|glutamatergic synapse|integral component of lumenal side of endoplasmic reticulum membrane|integral component of membrane|integral component of postsynaptic membrane|integral component of presynaptic active zone membrane|melanosome|membrane|mitoc…	mmu04141,mmu04145,mmu04612,mmu04918,mmu05166	Protein processing in endoplasmic reticulum|Phagosome|Antigen processing and presentation|Thyroid hormone synthesis|Human T-cell leukemia virus 1 infection	KOG0675	[O]	Calnexin	Posttranslational modification, protein turnover, chaperones	KOG0675	M	unfolded protein binding	Cell wall/membrane/envelope biogenesis	PF00262	Calreticulin	Calreticulin family
P35585	Ap1m1	11767	AP-1 complex subunit mu-1	GO:0030131,GO:0030136,GO:0030665,GO:0031410,GO:0043231,GO:0005802,GO:0035615,GO:0035646,GO:0006886,GO:0032438,GO:0016192	clathrin adaptor complex|clathrin-coated vesicle|clathrin-coated vesicle membrane|cytoplasmic vesicle|intracellular membrane-bounded organelle|trans-Golgi network|clathrin adaptor activity|endosome to melanosome transport|intracellular protein transport|melanosome organization|vesicle-mediated transport	mmu04142,mmu05170	Lysosome|Human immunodeficiency virus 1 infection	KOG0937	[U]	Adaptor complexes medium subunit family	Intracellular trafficking, secretion, and vesicular transport	KOG0937	U	vesicle-mediated transport	Intracellular trafficking, secretion, and vesicular transport	PF00928	Adap_comp_sub	Adaptor complexes medium subunit family
P35601	Rfc1	19687	Replication factor C subunit 1	GO:0005737,GO:0005663,GO:0031391,GO:0005730,GO:0005654,GO:0005634,GO:0032991,GO:0005524,GO:0003677,GO:0003689,GO:0061860,GO:0003690,GO:0019904,GO:0043565,GO:0090618,GO:0006281,GO:0006260,GO:0000122,GO:0045892,GO:0045893	cytoplasm|DNA replication factor C complex|Elg1 RFC-like complex|nucleolus|nucleoplasm|nucleus|protein-containing complex|ATP binding|DNA binding|DNA clamp loader activity|DNA clamp unloader activity|double-stranded DNA binding|protein domain specific binding|sequence-specific DNA binding|DNA clamp unloading|DNA repair|DNA replication|negative regulation of transcription by RNA polymerase II|nega…	mmu03030,mmu03420,mmu03430	DNA replication|Nucleotide excision repair|Mismatch repair	KOG1968	[L]	Replication factor C, subunit RFC1 (large subunit)	Replication, recombination and repair	KOG1968	E	DNA clamp loader activity	Amino acid transport and metabolism	PF00004	AAA	ATPase family associated with various cellular activities (AAA)
P35700	Prdx1	18477	Peroxiredoxin-1	GO:0005737,GO:0005829,GO:0000791,GO:0005759,GO:0005739,GO:0043209,GO:0005730,GO:0005634,GO:0005782,GO:0020037,GO:0042802,GO:0004601,GO:0051920,GO:0008379,GO:0008283,GO:0045454,GO:0034101,GO:0042744,GO:0045321,GO:0030101,GO:0042267,GO:1901222,GO:0032872,GO:0019430,GO:0006979,GO:0000302	cytoplasm|cytosol|euchromatin|mitochondrial matrix|mitochondrion|myelin sheath|nucleolus|nucleus|peroxisomal matrix|heme binding|identical protein binding|peroxidase activity|peroxiredoxin activity|thioredoxin peroxidase activity|cell population proliferation|cell redox homeostasis|erythrocyte homeostasis|hydrogen peroxide catabolic process|leukocyte activation|natural killer cell activation|natu…	mmu04146,mmu05146	Peroxisome|Amoebiasis	KOG0852	[O]	Alkyl hydroperoxide reductase, thiol specific antioxidant and related enzymes	Posttranslational modification, protein turnover, chaperones	KOG0852	O	peroxiredoxin activity	Posttranslational modification, protein turnover, chaperones	PF00578	AhpC-TSA	AhpC/TSA family
P35762	Cd81	12520	CD81 antigen	GO:0016324,GO:0009925,GO:0016323,GO:0070062,GO:0001772,GO:0016021,GO:0005887,GO:0016020,GO:0005886,GO:0097197,GO:0031982,GO:0015485,GO:0005178,GO:0042289,GO:1990459,GO:0001618,GO:0000187,GO:0035783,GO:0071404,GO:0002455,GO:0001771,GO:0034238,GO:0014905,GO:0072675,GO:0043128,GO:1905676,GO:0050871,GO:0030890,GO:0050861,GO:2000563,GO:0030307,GO:0008284,GO:0002863,GO:0050731,GO:1904352,GO:0070863,GO:…	apical plasma membrane|basal plasma membrane|basolateral plasma membrane|extracellular exosome|immunological synapse|integral component of membrane|integral component of plasma membrane|membrane|plasma membrane|tetraspanin-enriched microdomain|vesicle|cholesterol binding|integrin binding|MHC class II protein binding|transferrin receptor binding|virus receptor activity|activation of MAPK activity|…	mmu04662,mmu05160,mmu05144	B cell receptor signaling pathway|Hepatitis C|Malaria	KOG3882	[R]	Tetraspanin family integral membrane protein	General function prediction only	KOG3882	S	cell surface receptor signaling pathway	Function unknown	PF00335	Tetraspanin	Tetraspanin family
P35922	Fmr1	14265	Synaptic functional regulator FMR1	GO:0030424,GO:1904115,GO:0043679,GO:0015030,GO:0044297,GO:0042995,GO:0010369,GO:0005694,GO:0000775,GO:0005737,GO:0036464,GO:0010494,GO:0005829,GO:0030425,GO:1902737,GO:0043197,GO:0044327,GO:0044326,GO:0019897,GO:0032433,GO:0097386,GO:0098978,GO:0030426,GO:1990812,GO:0098686,GO:0016020,GO:1990124,GO:0015630,GO:0005845,GO:0043005,GO:0043025,GO:0071598,GO:0005730,GO:0005654,GO:0005634,GO:0043204,GO:…	axon|axon cytoplasm|axon terminus|Cajal body|cell body|cell projection|chromocenter|chromosome|chromosome, centromeric region|cytoplasm|cytoplasmic ribonucleoprotein granule|cytoplasmic stress granule|cytosol|dendrite|dendritic filopodium|dendritic spine|dendritic spine head|dendritic spine neck|extrinsic component of plasma membrane|filopodium tip|glial cell projection|glutamatergic synapse|grow…							ENOG502QPKJ	S	RNA strand annealing activity	Function unknown	PF00013	KH_1	KH domain
P35979	Rpl12	269261	60S ribosomal protein L12	GO:0005737,GO:0005829,GO:0022625,GO:0022626,GO:0015934,GO:0005730,GO:0005634,GO:0014069,GO:0070180,GO:0003735,GO:0006412	cytoplasm|cytosol|cytosolic large ribosomal subunit|cytosolic ribosome|large ribosomal subunit|nucleolus|nucleus|postsynaptic density|large ribosomal subunit rRNA binding|structural constituent of ribosome|translation	mmu03010,mmu05171	Ribosome|Coronavirus disease - COVID-19	KOG0886	[J]	40S ribosomal protein S2	Translation, ribosomal structure and biogenesis	KOG0886	J	ribosomal large subunit assembly	Translation, ribosomal structure and biogenesis	PF00298	Ribosomal_L11	Ribosomal protein L11, RNA binding domain
P35980	Rpl18	19899	60S ribosomal protein L18	GO:0005829,GO:0022625,GO:0022626,GO:0005783,GO:0005730,GO:0042788,GO:0005791,GO:0045202,GO:0003723,GO:0003735,GO:0002181	cytosol|cytosolic large ribosomal subunit|cytosolic ribosome|endoplasmic reticulum|nucleolus|polysomal ribosome|rough endoplasmic reticulum|synapse|RNA binding|structural constituent of ribosome|cytoplasmic translation	mmu03010,mmu05171	Ribosome|Coronavirus disease - COVID-19	KOG1714	[J]	60s ribosomal protein L18	Translation, ribosomal structure and biogenesis	KOG1714	J	ribosomal protein	Translation, ribosomal structure and biogenesis	PF17135	Ribosomal_L18	Ribosomal protein 60S L18 and 50S L18e
[truncated: 1,681 more rows]

## Sheet: Tyrosine related membrane recep
Gene_Name	Product
Gosr2	Golgi SNAP receptor complex member 2
Pgrmc1	Membrane-associated progesterone receptor component 1
Gosr1	Golgi SNAP receptor complex member 1
Pdgfrb	Platelet-derived growth factor receptor beta
Il1rl1	Interleukin-1 receptor-like 1
M6pr	Cation-dependent mannose-6-phosphate receptor
Plaur	Urokinase plasminogen activator surface receptor
Srprb	Signal recognition particle receptor subunit beta
Scarf2	Scavenger receptor class F member 2
Gabarapl2	Gamma-aminobutyric acid receptor-associated protein-like 2
Lpar1	Lysophosphatidic acid receptor 1
Rack1	Receptor of activated protein C kinase 1
Igf2r	Cation-independent mannose-6-phosphate receptor
Eps8	Epidermal growth factor receptor kinase substrate 8
Tradd	Tumor necrosis factor receptor type 1-associated DEATH domain protein
Thrap3	Thyroid hormone receptor-associated protein 3
[truncated: 16 more rows]
