# Supplementary material for: Caveolae-Mediated Sensing of Nanoporous Cues in Fibroblasts Reprogramming During Wound Healing
Source: Research Square preprint supplement (doi:10.21203/rs.3.rs-5955293/v1), 2025-02-19
Supplement: Supplementary file 3 [file c8f64acc93581c6fe50e0235.docx]

**Caveolae-Mediated Sensing of Nanopores in Fibroblasts Reprogramming During Wound Healing**

**Table of Contents for the Supplementary Data:**

Supplementary Table 1. Primer sequence of RT-qPCR

Supplementary Table 2. Primer sequence of qPCR for ChIP

Supplementary Table 3. Four truncation probe sequence for Dual-luciferase

Supplementary Table 4. SiRNA and shRNA sequence for gene silence

Supplementary Table 5. List for tyrosine related membrane receptors through LC-MS/MS analysis (Individual excel file)

Supplementary Table 6. List for RNA-seq DDEPs (Individual excel file)

Supplementary Table 7. Whole lists for JASPAR and DNA-pull down (Individual excel file)

Supplementary Table 8. List for four RUNX1 binding sites in the promoter of FGFBP3

Extended Data Figures. Figure 1-29

**Supplementary Table 1. Primer sequence of RT-qPCR**

| **Gene name** | **Towards** | **Primer sequence (5′–3′)** |
| --- | --- | --- |
| mFGFBP3 | FORWARD | GGTCGCTTCGTGAGTCCAG |
| mFGFBP3 | REVERSE | AGCAGCCGTCTCCAGTAGT |
| mRUNX1 | FORWARD | CACCCAGCGACACCCATTTCAC |
| mRUNX1 | REVERSE | CGGAGATGGACGGCAGAGTAGG |
| mGAPDH | FORWARD | AGGTCGGTGTGAACGGATTTG |
| mGAPDH | REVERSE | TGTAGACCATGTAGTTGAGGTCA |

**Supplementary Table 2.** **Biotinylated primer sequence of qPCR for DNA pulldown**

| **Gene name** | **Towards** | **Primer sequence (5′–3′)** |
| --- | --- | --- |
| mFGFBP3-5'bio-F1 | FORWARD | TTCCTCTCTGCCCTCACATG |
| mFGFBP3-5'bio-R1 | REVERSE | TCCCACCTTGCAAGTCTCAA |
| mFGFBP3-5'bio-F2 | FORWARD | GCATTTGAGCACACACACCA |
| mFGFBP3-5'bio-R2 | REVERSE | TCTGTTCTTTGTATGCCTCTGT |
| mFGFBP3-5'bio-F3 | FORWARD | GCATTTGAGCACACACACCA |
| mFGFBP3-5'bio-R3 | REVERSE | TCAGATGTGCCAGAAGAGGG |
| mFGFBP3-5'bio-F4 | FORWARD | CGCTTGCTTTTAATCCCAGC |
| mFGFBP3-5'bio-R4 | REVERSE | TCTGTTCTTTGTATGCCTCTGT |

**Supplementary Table 3. Truncation probe sequence for Dual-luciferase**

| **Gene name** | **Primer sequence (5′–3′)** |
| --- | --- |
| mFGFBP3 promoter-del 1 | GTATGTGGTCT pGL3-Basic |
| mFGFBP3 promoter-del 2 | CCATGTGGTTG pGL3-Basic |
| mFGFBP3 promoter-del 3 | GTTTTTGGTTT pGL3-Basic |
| mFGFBP3 promoter del 4 | CCATGTGGTTG pGL3-Basic |

**Supplementary Table 4. ShRNA and siRNA sequence for gene silence**

| **Gene name** | **Primer sequence (5′–3′)** |
| --- | --- |
| mCAV1-sh-1 | GCGAAUGAUUGUCAGCAAA |
| mCAV1-sh-2 | GGUCCUAUGACCAGUCCUA |
| mCAV1-sh-3 | GGAAGAAUAUUGUAGAAUU |
| mRUNX1-si-1 | GGUCCUAUGACCAGUCCUA |
| mCAV1-si-1 | GGUCAAGAUUGACUUUGAA |
| mCBFβ-si-1 | GCGGUGAUGAUCUCAAACUTT |
| mPDGFRβ-si-1 | CGACGTGGTCAAGATTGACTT |
| mFGFBP3-si-1 | GCCCTCCTACCATCTATACTA |

**Supplementary Table 8. List for four RUNX1 binding sites in the promoter of FGFBP3**

| **Matrix** **ID** | **Name** | **Score** | **Relative** **score** | **Sequence** **ID** | **Start** | **End** | **Strand** | **Predicted sequence** |
| --- | --- | --- | --- | --- | --- | --- | --- | --- |
| MA0002.2 | MA0002.2.RUNX1 | 10.976962 | 0.9121174562768976 | NC_000085.7:C36898999-36896999 | 495 | 505 | + | GTATGTGGTCT |
| MA0002.2 | MA0002.2.RUNX1 | 9.910577 | 0.8913268106857948 | NC_000085.7:36898999-36896999 | 1205 | 1215 | + | GTTITTGGTTT |
| MA0002.2 | MA0002.2.RUNX1 | 9.A32303 | 0.8820022139659185 | NC_000085.7:36898999-36896999 | 387 | 397 | + | CCATGTGGTTG |
| MA0002.2 | MA0002.2.RUNX1 | 9.A32303 | 0.8820022139659185 | NC_000085.7:36898999-36896999 | 929 | 939 | + | CCATGTGGTTG |

**
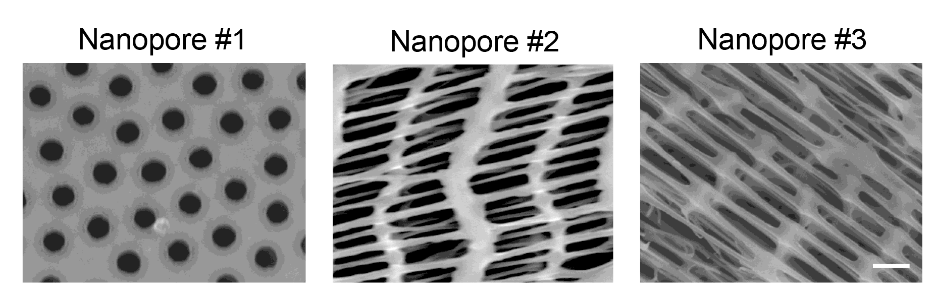
Extended Data Figures:**

**Figure 1. Surface characterization of scaffolds with diverse** **nanopores.** Scanning electron microscopy images of the surfaces of scaffolds with different nanopores. The scaffolds with distinct nanopores include round (named as Nanopore #1), 3×-stretched oval (named as Nanopore #2), and 6×-stretched oval (named as Nanopore #3), respectively. Scale bars, 500 nm.

**
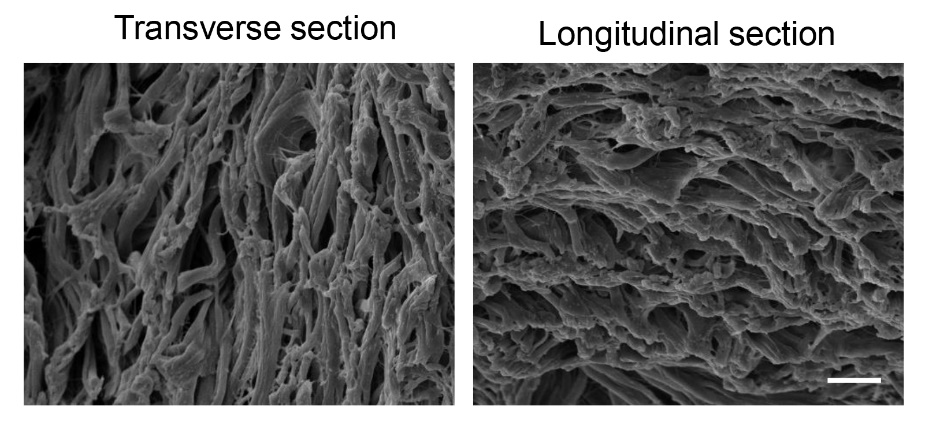
**

**Figure 2. Surface and cross-sectional characterization of artificial dermis scaffolds. a**) Scanning electron microscopy images of the surface of artificial dermis scaffolds. **b**) Scanning electron microscopy images of the cross-section of artificial dermis scaffolds. Scale bars, 10 μm.

**
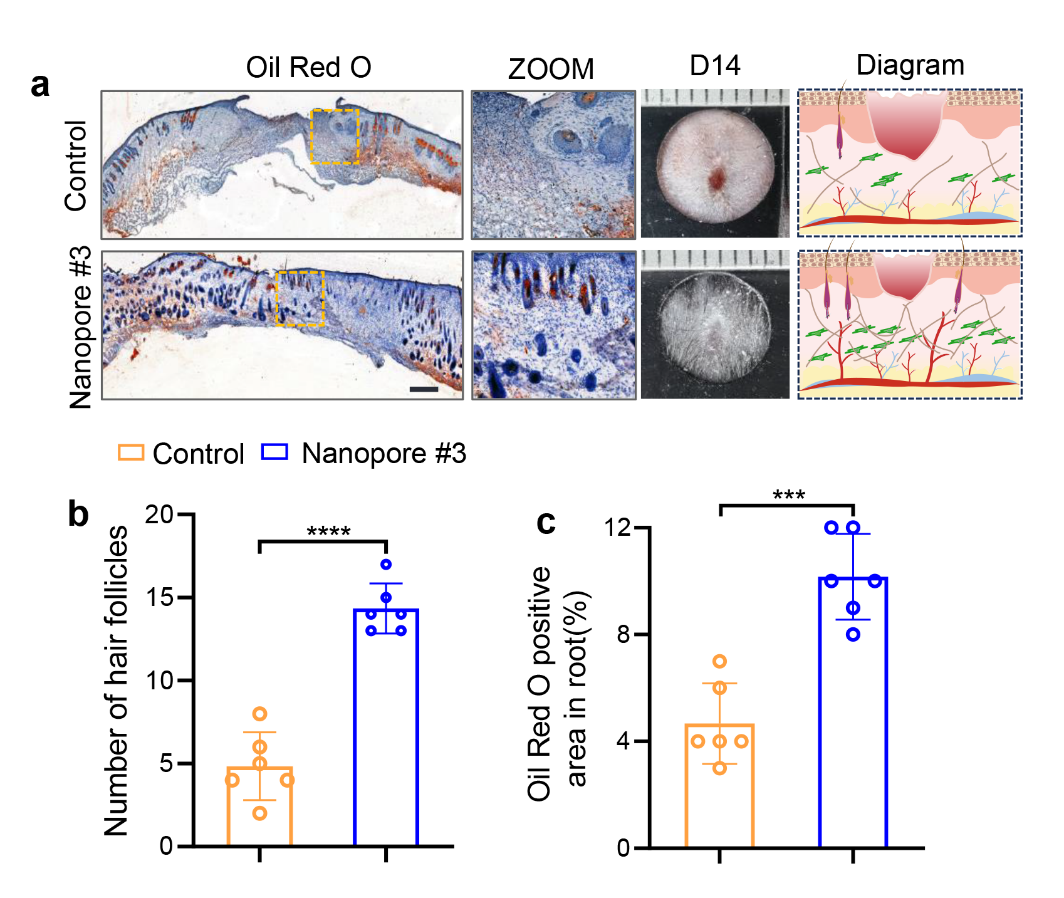
**

**Figure 3. Enhanced regeneration of dermal appendages with Nanopore #3 scaffold treatment. a**) Oil Red O staining of wounds treated with PBS and Nanopore #3 scaffold after 14 days, with corresponding wound images. Scale bars, 0.5 mm. **b**) Quantitative analysis of hair follicles. **c**) Quantitative analysis of Oil Red O positive area at the wound site. *n* = 6. Data are presented as mean ± SD, ****p* < 0.001.


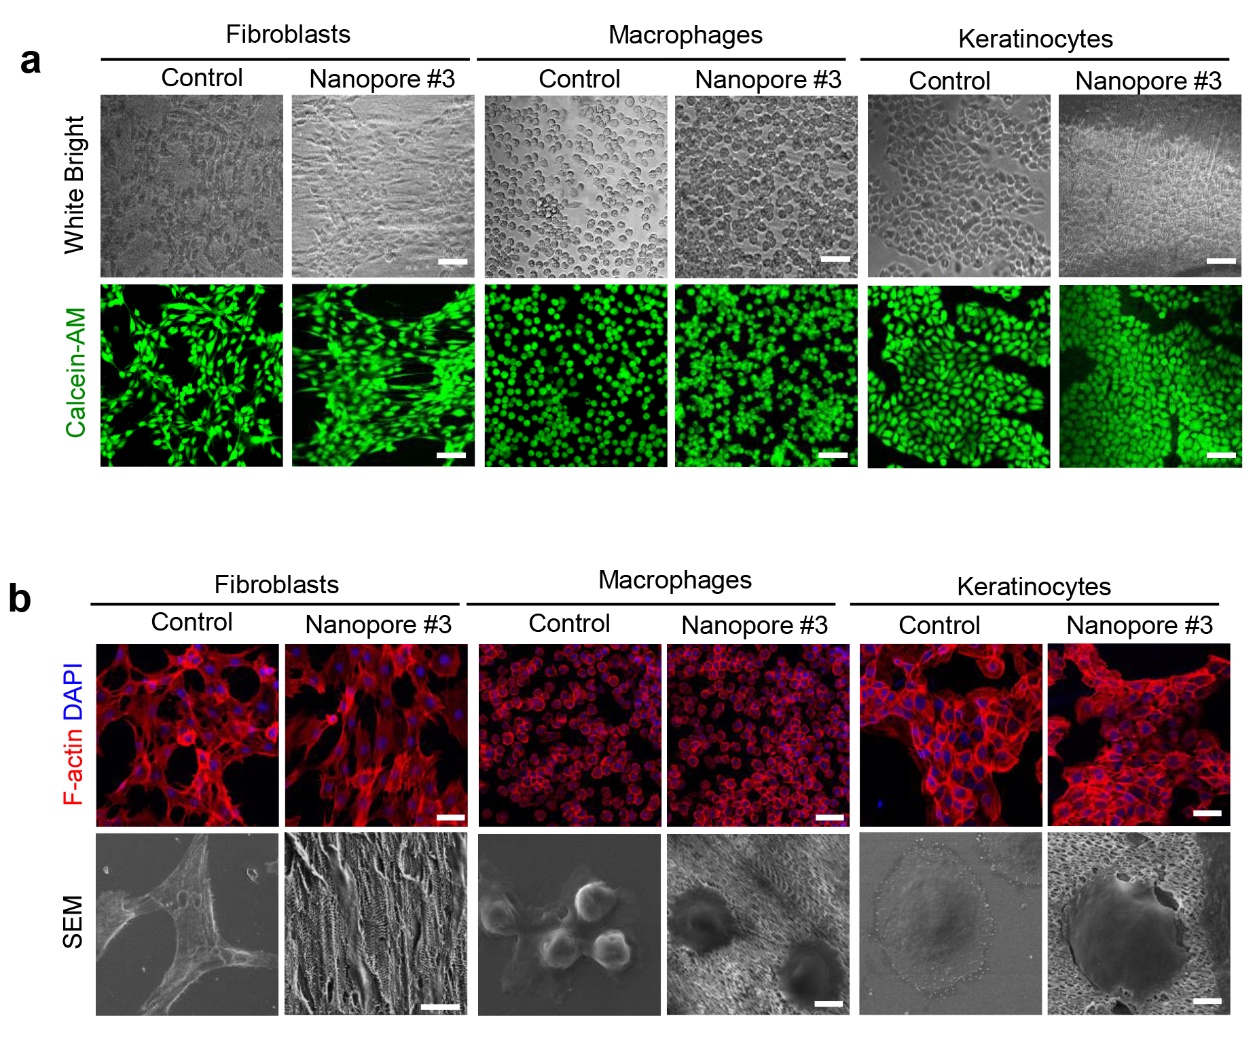


**Figure 4.** **Effect of the** **Nanopore on the biological behavior of various cells** **derived from skin. a**) Optical and Calcein-AM staining images of primary fibroblasts, macrophages and keratinocytes derived from skin cultured on plates or Nanopore #3 scaffold. Scale bars, 100 μm. **b**) Cytoskeleton staining (Scale bars, 50 μm) and scanning electron microscopy images of primary fibroblasts (Scale bars, 20 μm), macrophages (Scale bars, 10 μm) and keratinocytes (Scale bars, 5 μm), respectively.


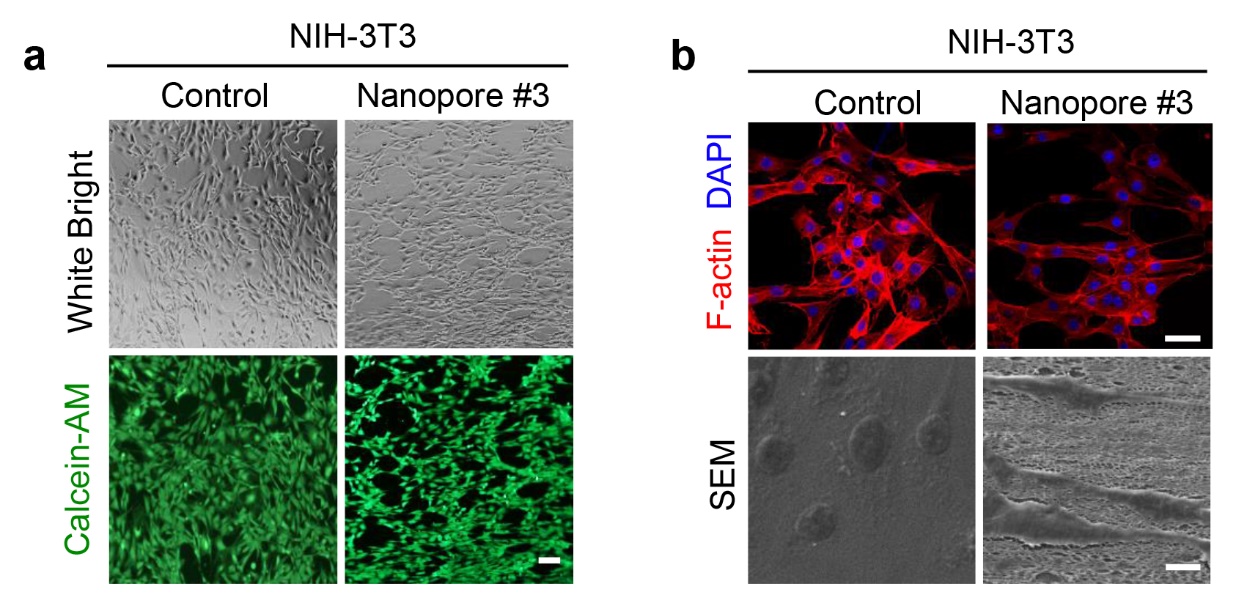


**Figure 5.** **Effect of the Nanopore on the biological behavior of NIH-3T3 cells. a)** Optical and Calcein-AM staining images of NIH-3T3 cells planted on plates or Nanopore #3 scaffold. Scale bars, 100 μm. **b**) Cytoskeleton staining (Scale bars, 50 μm) and SEM images of NIH-3T3 cells (Scale bars, 10 μm).


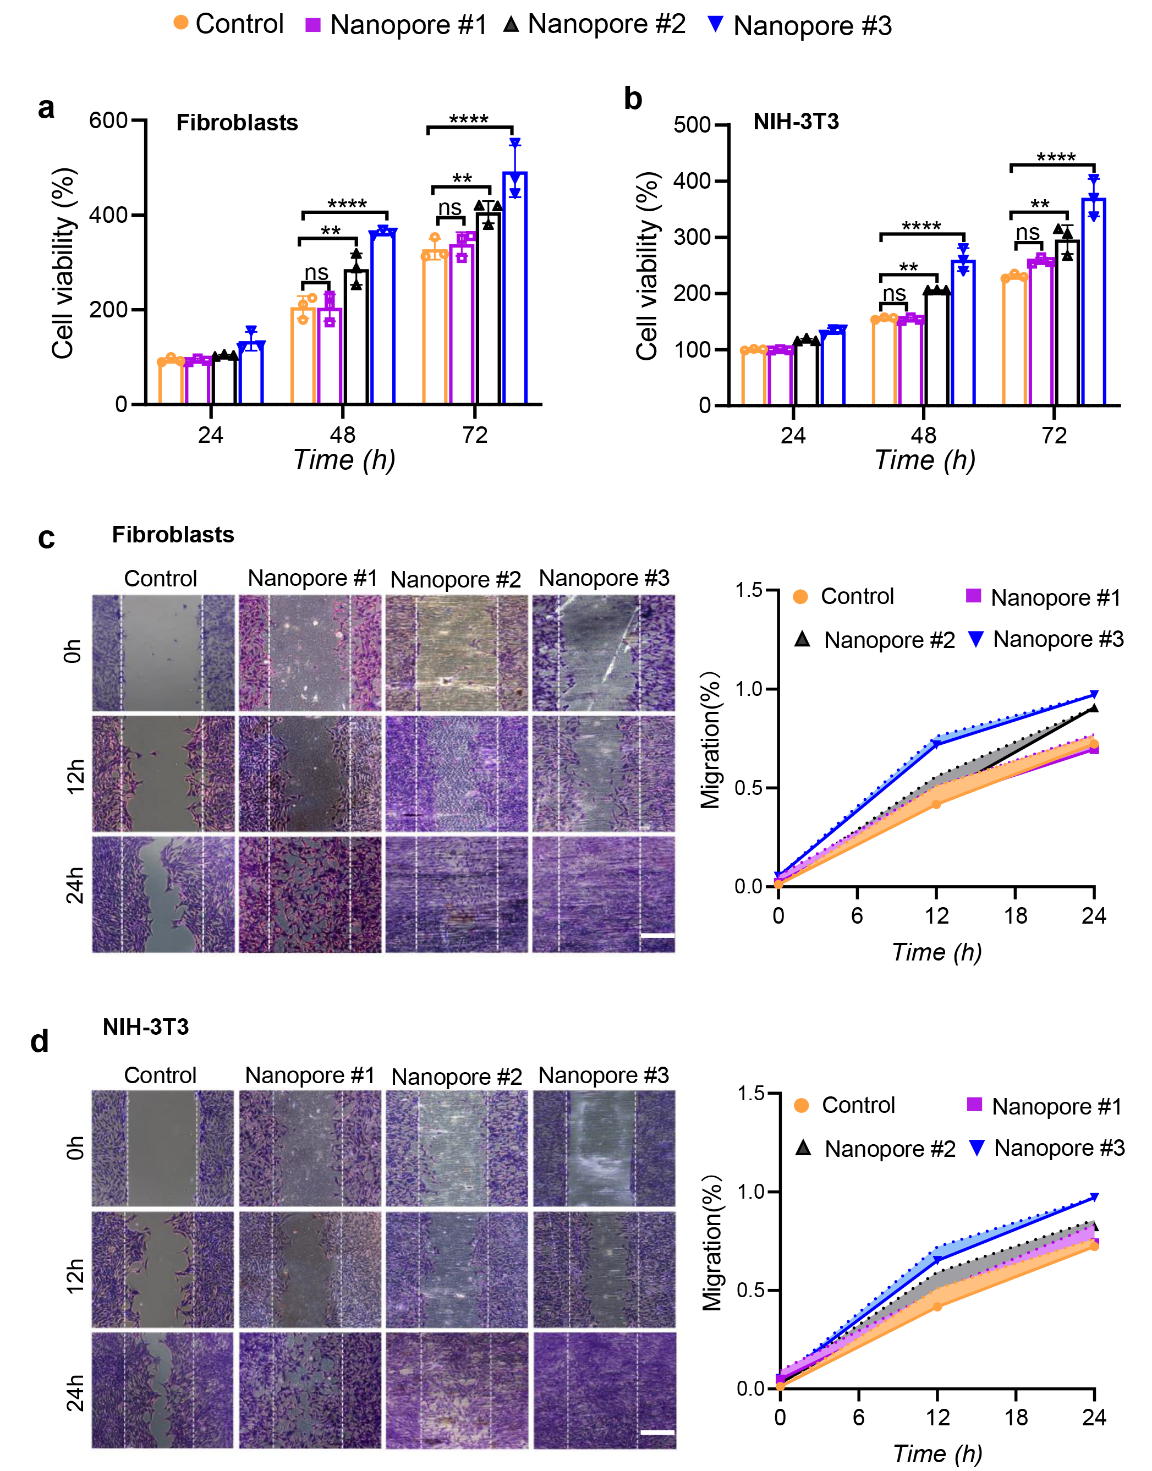


**Figure 6**. **Nanopores affect the proliferation and migration ability of fibroblasts. a and b**) Cell counting kit-8 assay was performed to determine thecell proliferation of primary fibroblasts and NIH-3T3 cells cultured on diverse scaffolds after 24, 48 and 72 hours. **c and d**) Wound healing assay was used to determine the migration of primary fibroblasts and NIH-3T3 cells planted on different scaffolds. Scale bars, 200 μm. *n* = 3. Data are presented as mean ± SD, **p* < 0.05, ***p* < 0.01, ****p* < 0.001, *****p* < 0.0001.


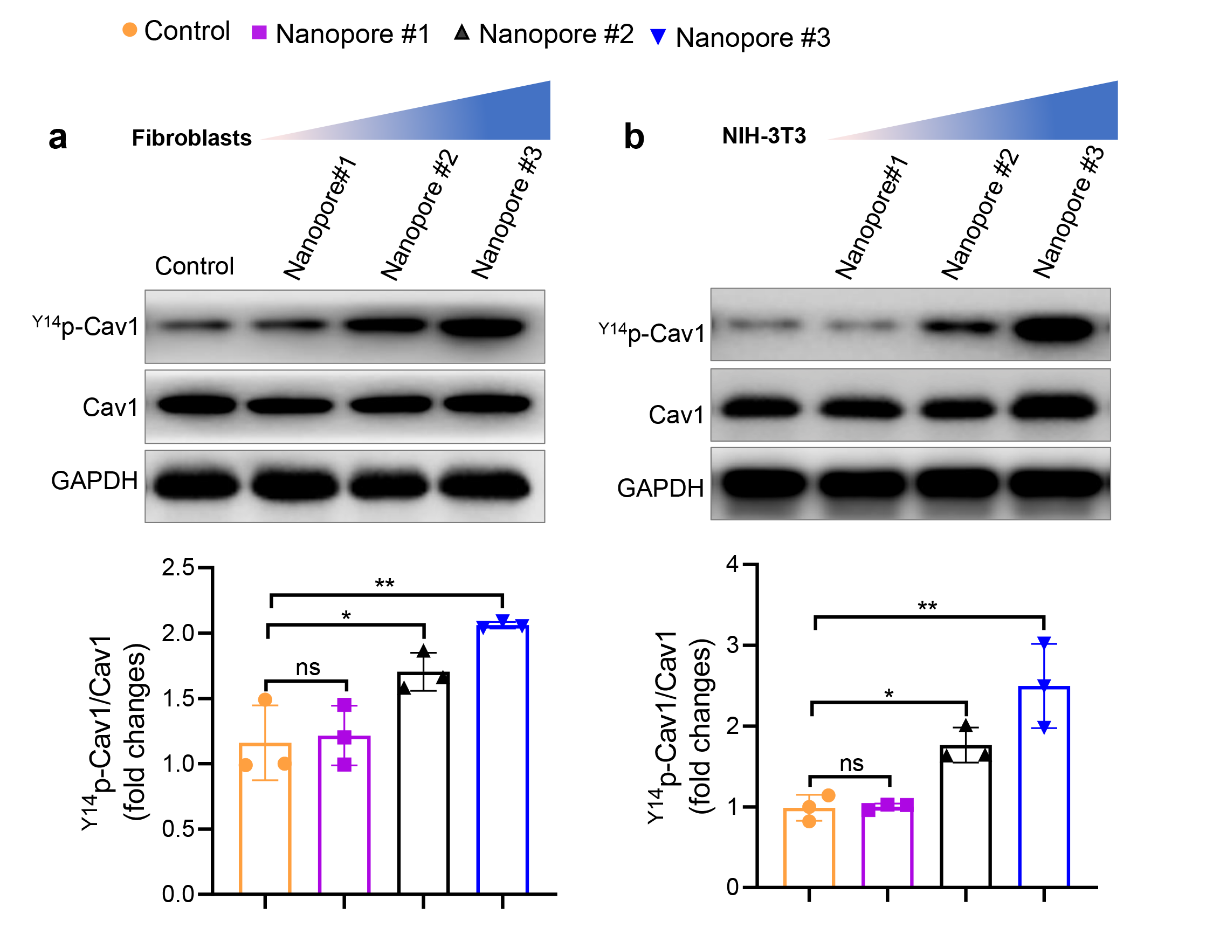


**Figure 7. The effect of various of nanopore shape structure scaffolds on Y14p-CAV1 protein expression. a and b)** Y14p-CAV1 protein levels in primary fibroblasts and NIH-3T3 cells planted on plates or various of nanopore scaffolds were examined by immunoblot analysis. *n* = 3. Data are presented as mean ± SD, **p* < 0.05, ***p* < 0.01.


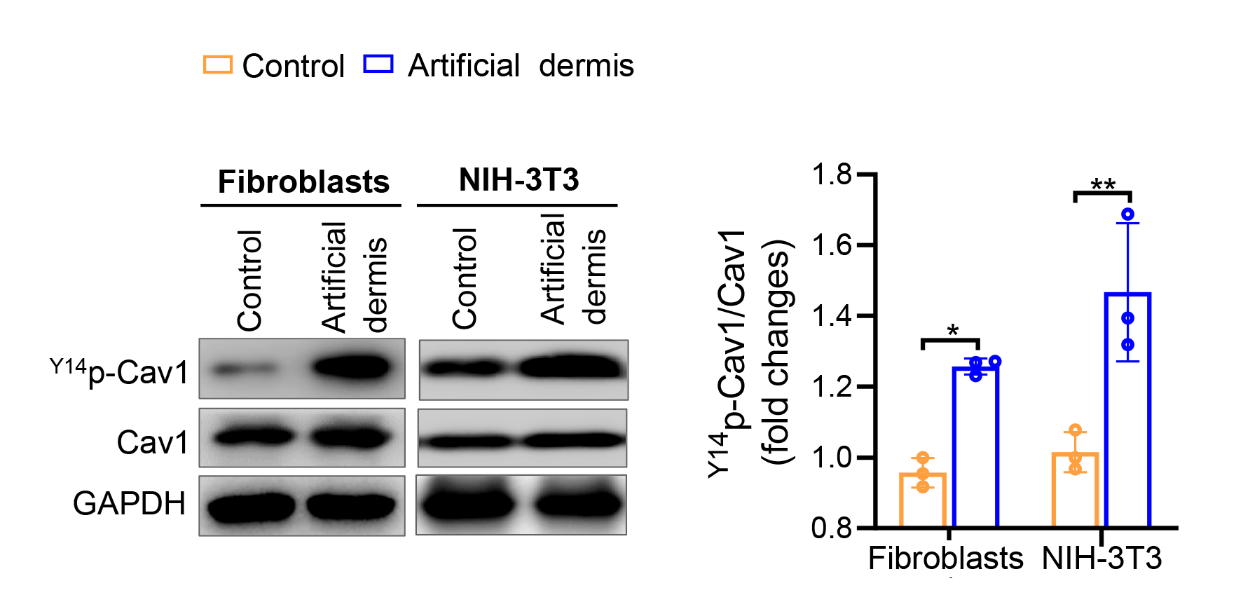


**Figure 8. Artificial dermis scaffolds promote the expression of phosphorylated** **Cav1 protein. a**)Y14p-Cav1 protein levels in primary fibroblasts and NIH-3T3 cells planted on plates or artificial dermis scaffold examined by immunoblot. **b**)Quantitative analysis of Y14p-Cav1 protein levels. *n* = 3. Data are presented as mean ± SD, **p* < 0.05, ***p* < 0.01.

**
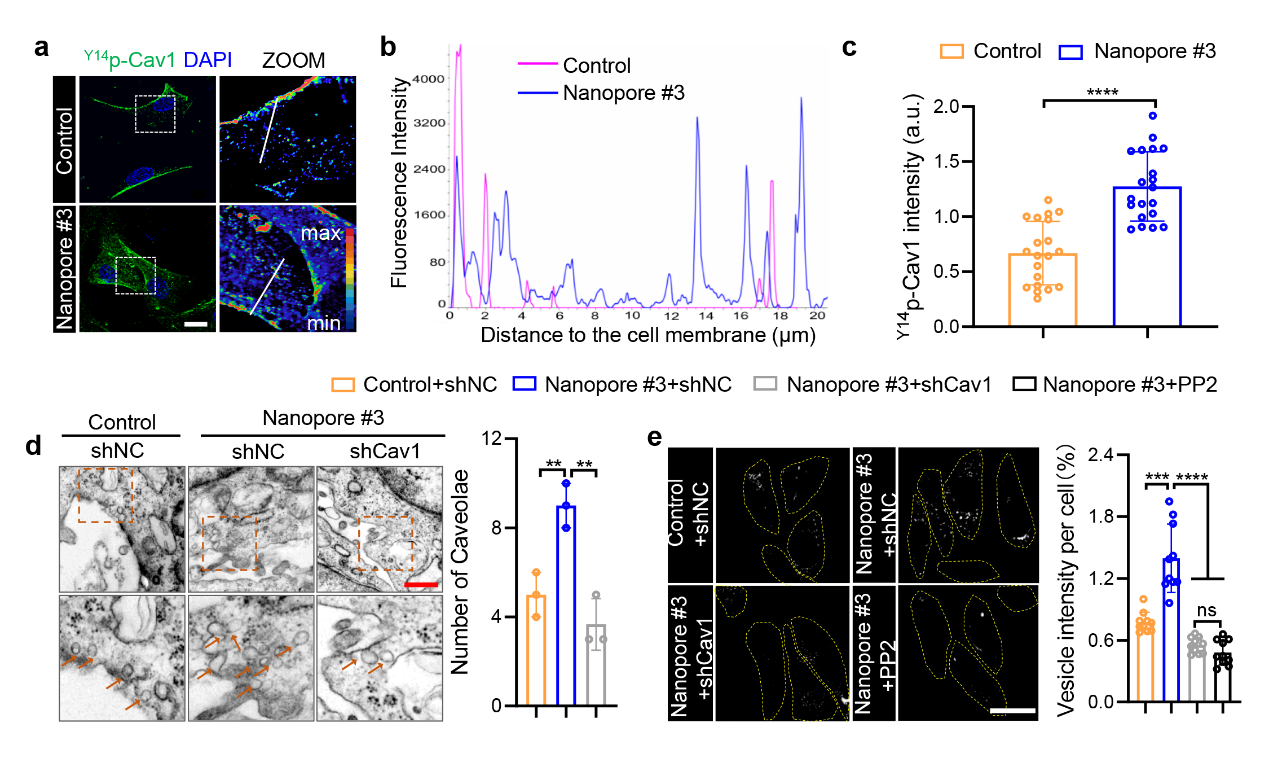
**

**Figure 9. The nanopore promotes phosphorylation of Cav1 and endocytosis of caveolae in NIH-3T3 cells. a**) Representative immunofluorescence images of Y14p-Cav1 in NIH-3T3 cells. Scale bars, 20 μm. **b**) quantification of the fluorescence intensity across the white line in (a). **c**) Quantitative analysis of the fluorescence of Y14p-Cav1 protein. **d**)Transmission electron microscopy images of Cav1 knockdown cells. Red arrows highlight caveolar rosettes and caveolae. Scale bar, 0.5 μm. **e)** Fluorescence images of endocytosed FM1- 43 dye in NIH-3T3 cells on plate or Nanopore 3# scaffold. Scale bar, 50 μm, *n* = 3. Data are presented as mean ± SD, ***p* < 0.01, ****p* < 0.001, ****p* < 0.0001.


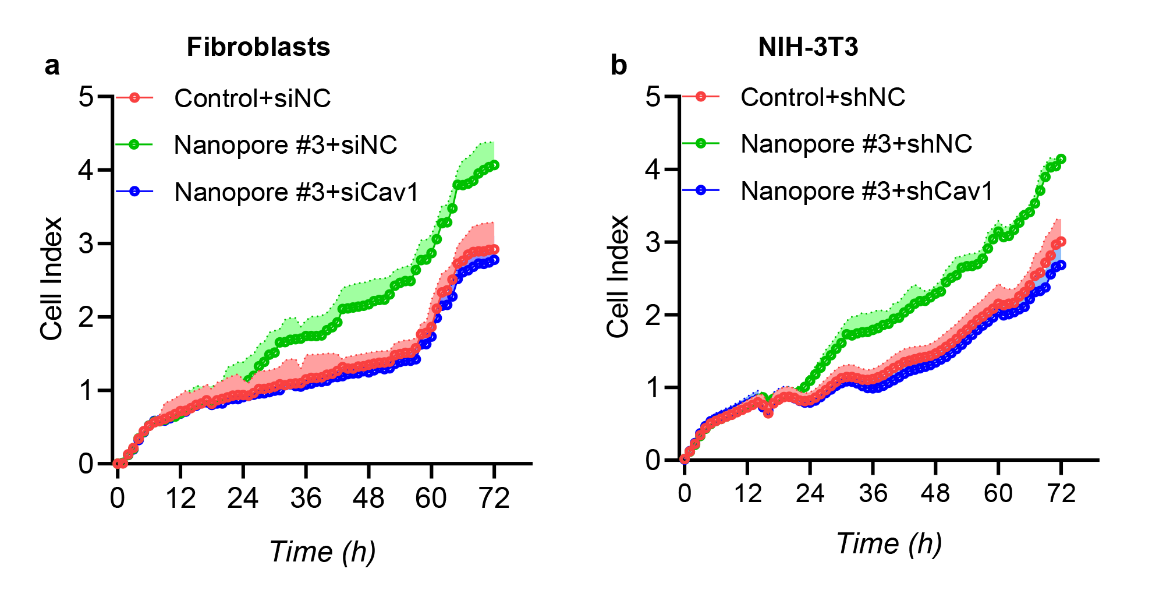


**Figure 10. Effect of Cav1 knockdown on the proliferation of fibroblasts cultured on Nanopore 3# scaffold. a and b**) Real Time Cellular Analysis (RTCA) was performed to determine the cell proliferation of Cav1 knockdown primary fibroblasts or NIH-3T3 cells cultured on Nanopore 3# scaffold after 72 hours. *n* = 5. Data are presented as mean ± SD.


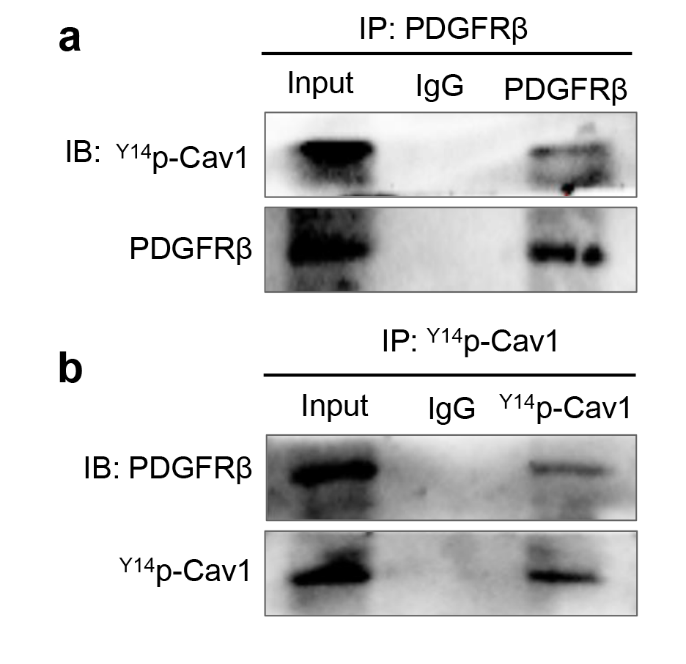
**Figure 11.** **Interaction between endogenous** **PDGFRβ and Y14p-Cav1 protein in fibroblasts**. **a**) The cell lysates were subjected to immunoprecipitation with PDGFRβ antibody, followed by immunoblotting Y14p-Cav1 with the antibody. **b**) The cell lysates were also subjected to immunoprecipitation with Y14p-Cav1 antibody, followed by immunoblotting with the PDGFRβ antibody. Cell lysates were also subjected to immunoprecipitation with IgG antibody as negative control.


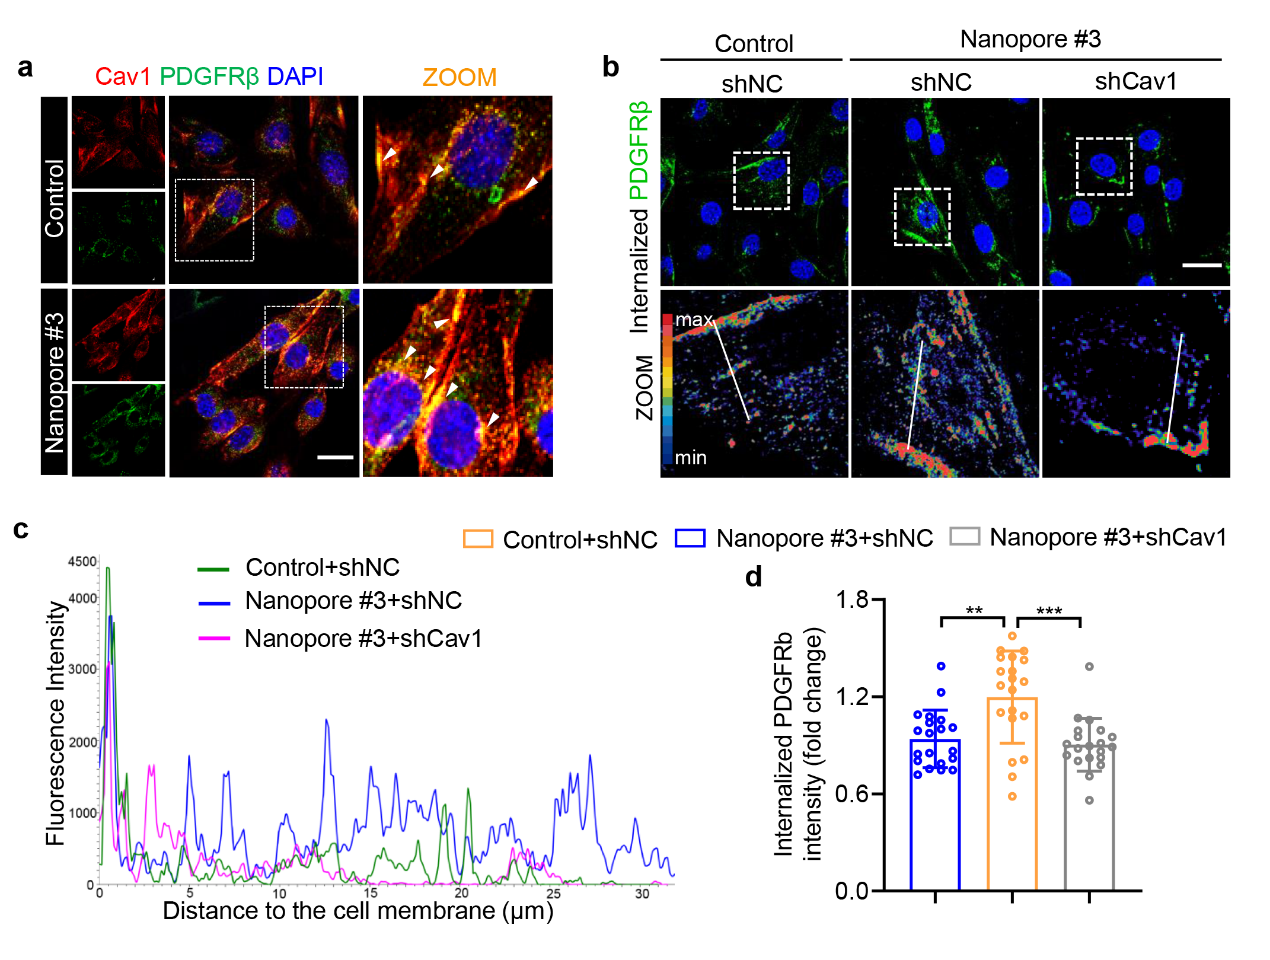


**Figure 12.** **Nanopore promotes the internalization of PDGFRβ binding with Cav1 during caveolae formation. a**) Co-localization of endogenous PDGFRβ and Cav1 was examined by double immunofluorescence staining. Scale bars, 20 μm. **b**)Representative immunofluorescence images of internalized PDGFRβ in NIH-3T3 cells cultured on plates or Nanopore #3 scaffold. Scale bars, 20 μm. **c**) Quantification of the fluorescence intensity across the white line in (b). **d**) Intensity of internalized PDGFRβ in NIH-3T3 cells cultured on plates or Nanopore #3 scaffold. Scale bars, 50 μm. *n* = 20. Data are presented as mean ± SD, ***p* < 0.01, ****p* < 0.001.

**
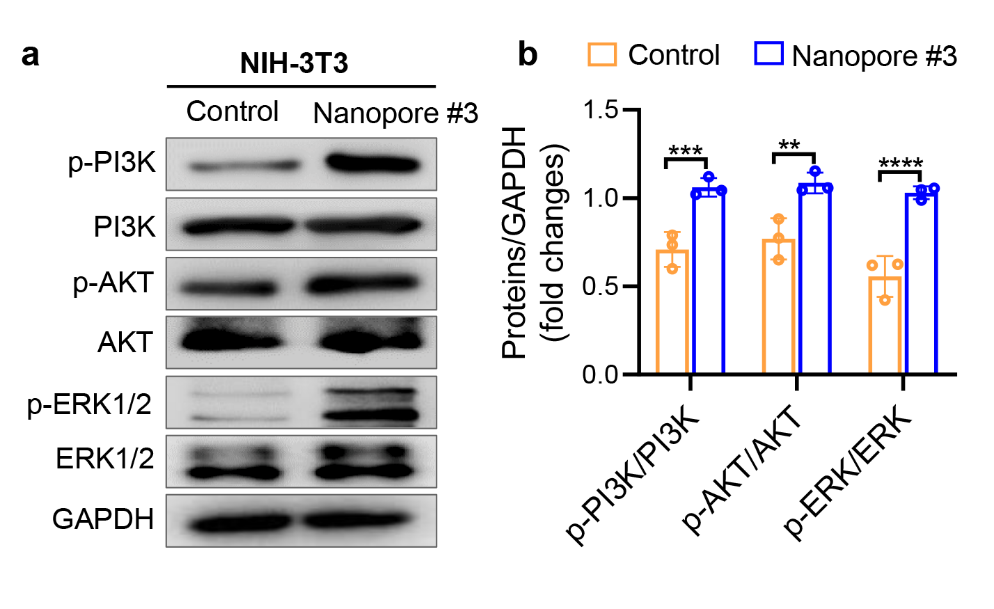
**

**Figure 13. Effect of nanopore on ERK and PI3K-AKT signaling pathways in NIH-3T3 cells. a**) Immunoblot analysis showed PI3K, p-PI3K, AKT, p-AKT, ERK and p-ERK protein levels from whole cell lysates of NIH-3T3 cells cultured on plates and Nanopore #3 scaffold for 2 days, where GAPDH acts as housekeeping protein. **b**) Quantification of relative protein levels detected by immunoblot analysis. n = 3. Data are presented as mean ± SD, ***p* < 0.01, ****p* < 0.001.


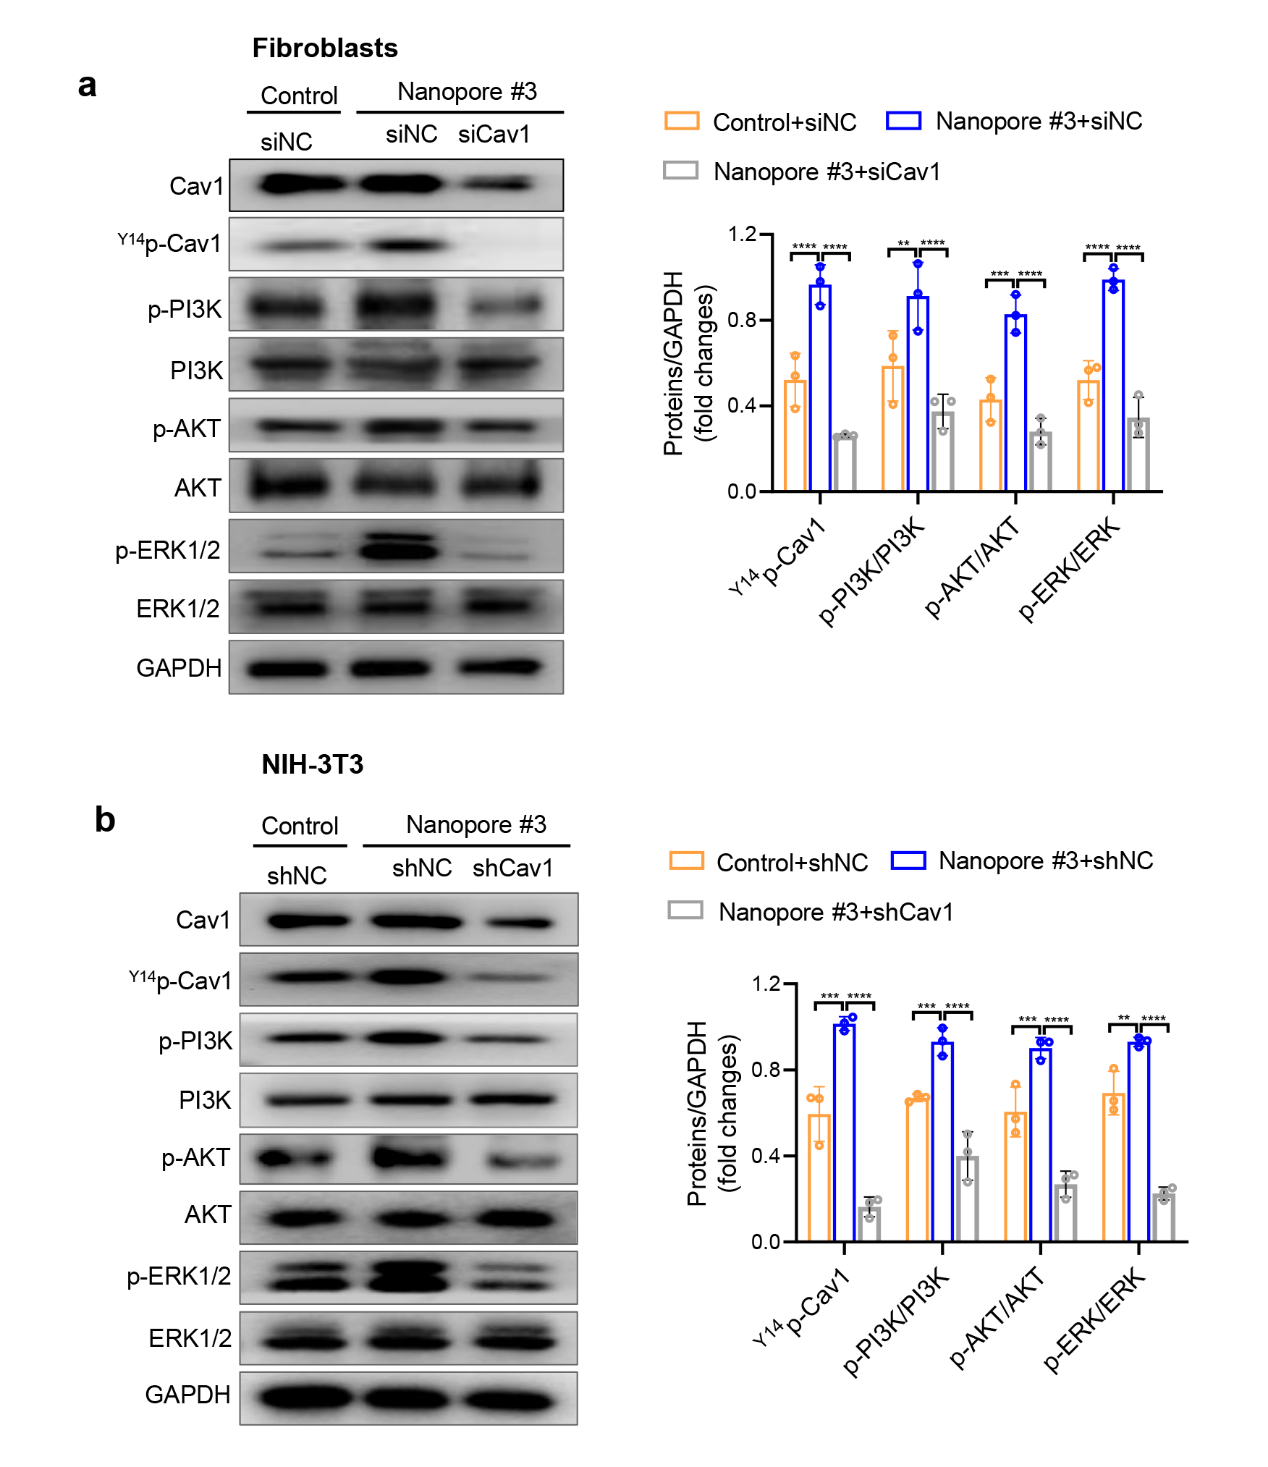


**Figure 14. Effect of Cav1 knockdown on ERK and PI3K-AKT signaling pathways in NIH-3T3 cells. a**)Immunoblot analysis showed PI3K, p-PI3K, AKT, p-AKT, ERK and p-ERK protein levels from whole cell lysates of fibroblasts cultured on plates and Nanopore #3 scaffold for 2 days. **b**) Immunoblot analysis showed PI3K, p-PI3K, AKT, p-AKT, ERK and p-ERK protein levels from whole cell lysates of NIH-3T3 cells cultured on plates and Nanopore 3# scaffold. *n* = 3. Where protein levels were normalized to GAPDH. Data are presented as mean ± SD, **p* < 0.05, ***p* < 0.01, ****p* < 0.001, ****p* < 0.0001.

**
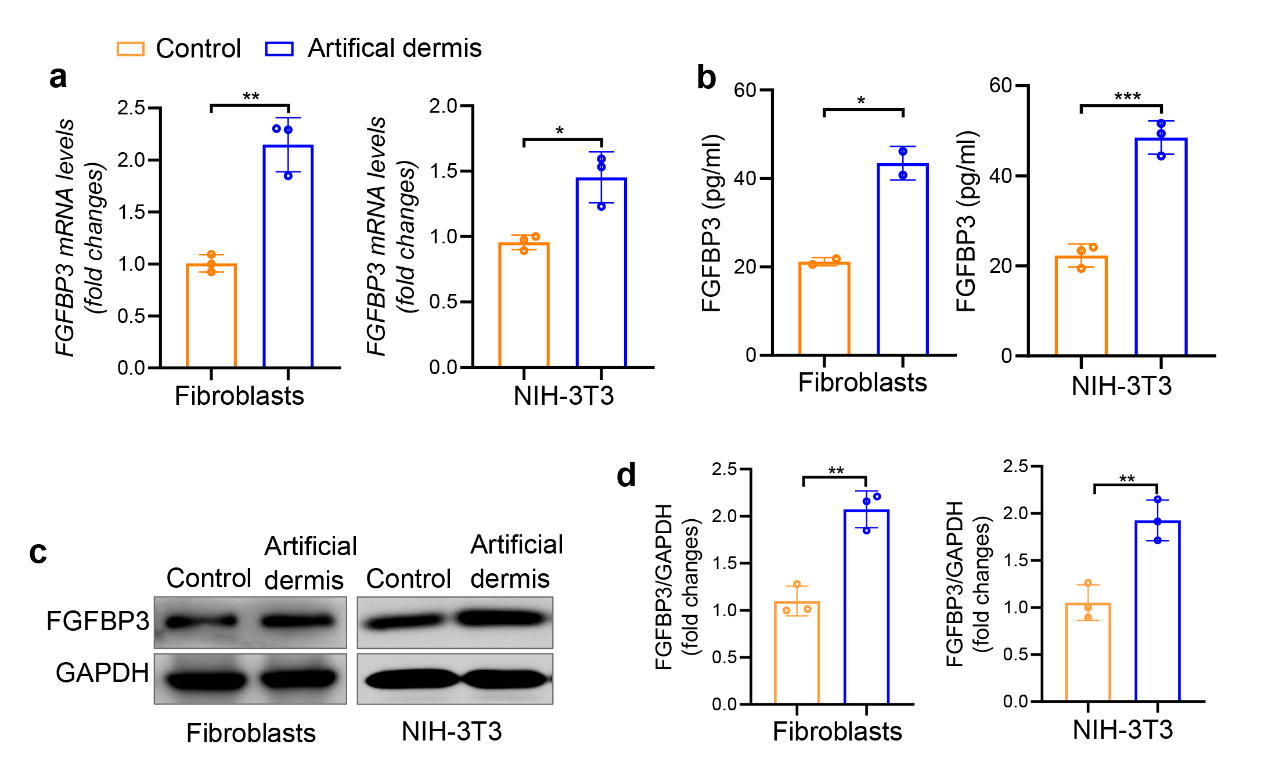
**

**Figure 15. Effect of artificial dermal scaffold on the expression of secretory protein FGFBP3. a**) *FGFBP3* mRNA levels in cells planted on plates or artificial dermal scaffolds respectively. **b**) Secretion of FGFBP3 protein levels in the supernatant of cells planted on plates or artificial dermal scaffold was examined by ELISA assays. **c**) FGFBP3 protein levels in cells planted on plates or artificial dermal scaffold was examined by immunoblot analysis. **d**) Quantification of FGFBP3 protein levels in (c). *n* = 3. Data are presented as mean ± SD, **p* < 0.05, ***p* < 0.01.


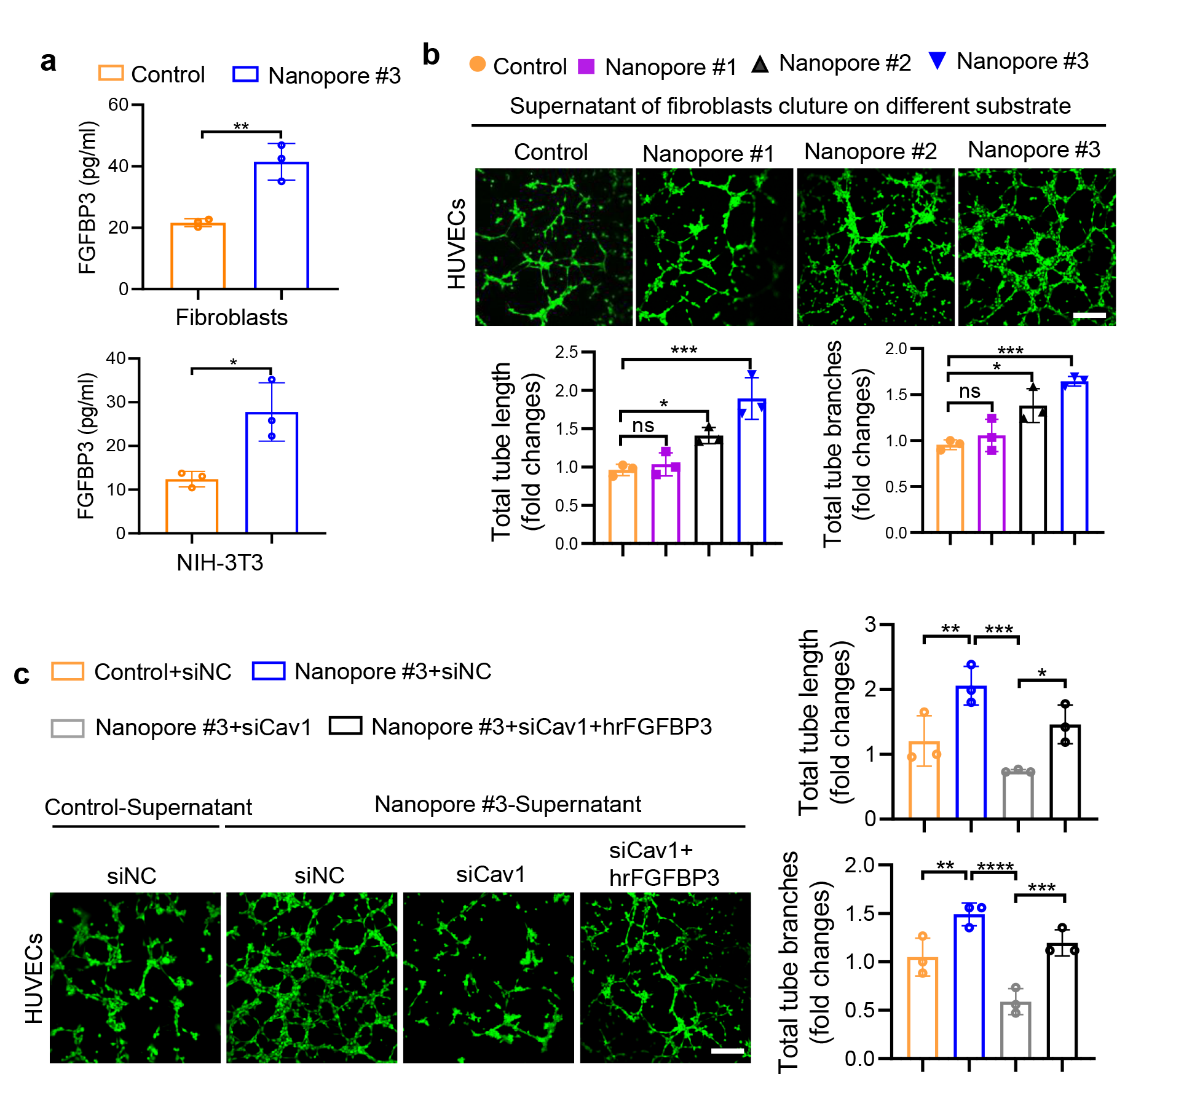


**Figure 16. The angiogenesis ability of HUVECs promoted by Nanopore #3-induced** **increased secretion of FGFBP3 in the supernatant was inhibited in Cav1 knockdown fibroblasts. a**) Secretion of FGFBP3 protein levels in the supernatant of primary fibroblasts and NIH-3T3 cells planted on plates or Nanopore #3 scaffold was examined by ELISA assays. **b**) Fluorescence images and quantifications of HUVECs forming tubule-like structures with the supernatant of primary fibroblasts cultured on various Nanopore scaffolds. Scale bars, 200 μm. **c**) Fluorescence images and quantifications of HUVECs forming tubule-like structures with the supernatant of Cav1 knockdown fibroblasts cultured on plates or Nanopore 3# scaffold. Scale bars, 200 μm. *n* = 3. Data are presented as mean ± SD, **p* < 0.05, ***p* < 0.01, ****p* < 0.001, ****p* < 0.0001.


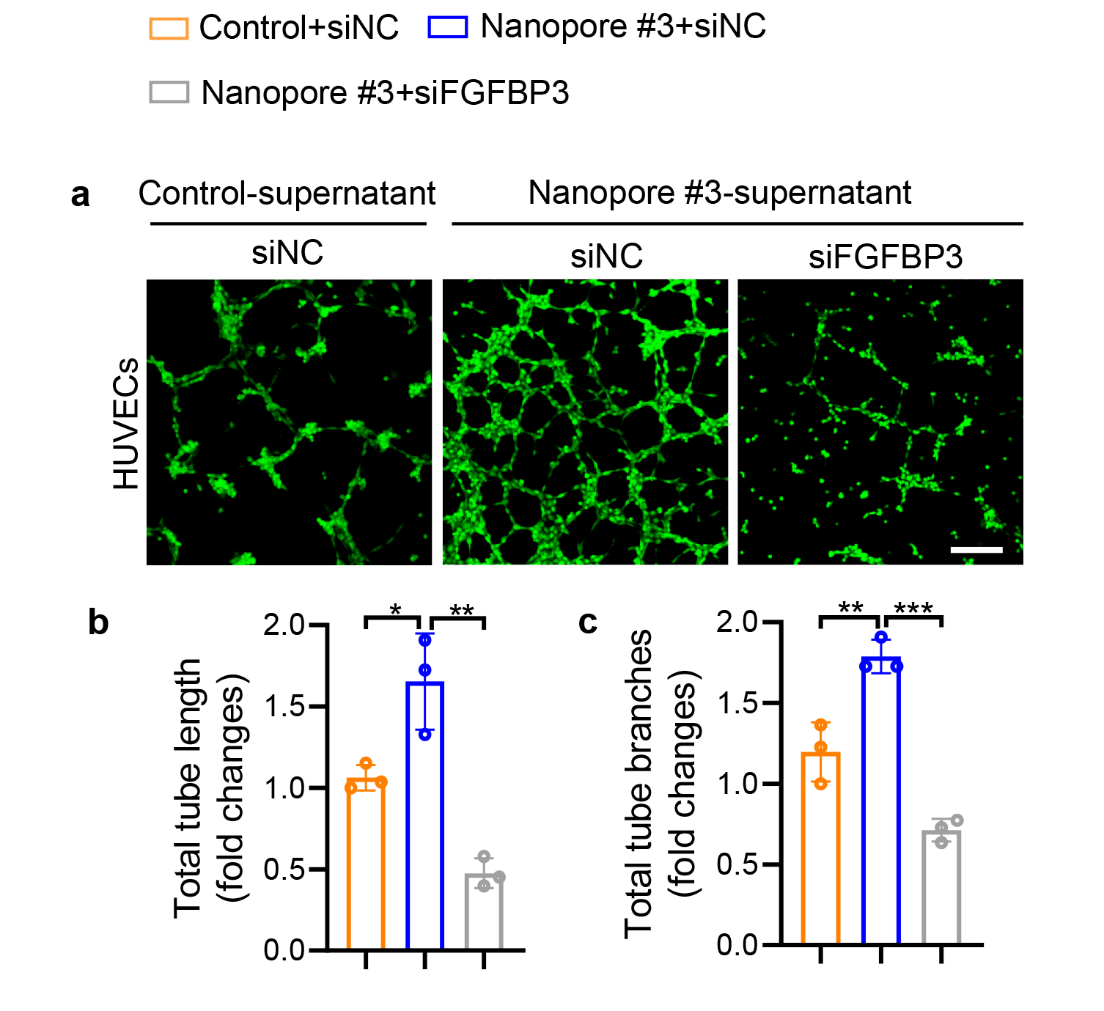


**Figure 17. Effect of FGFBP3 knockdown NIH-3T3 cells supernatant on the angiogenesis of vascular endothelial cells. a**) Fluorescence images of HUVECs forming tubule-like structures with the supernatant of FGFBP3 knockdown NIH-3T3 cells cultured on plates or Nanopore 3# scaffold. Scale bars, 200 μm. **b and c**) Quantification of total tube length and total tube branches of various of groups. *n* = 3. Data are presented as mean ± SD, **p* < 0.05, ***p* < 0.01, ****p* < 0.001.


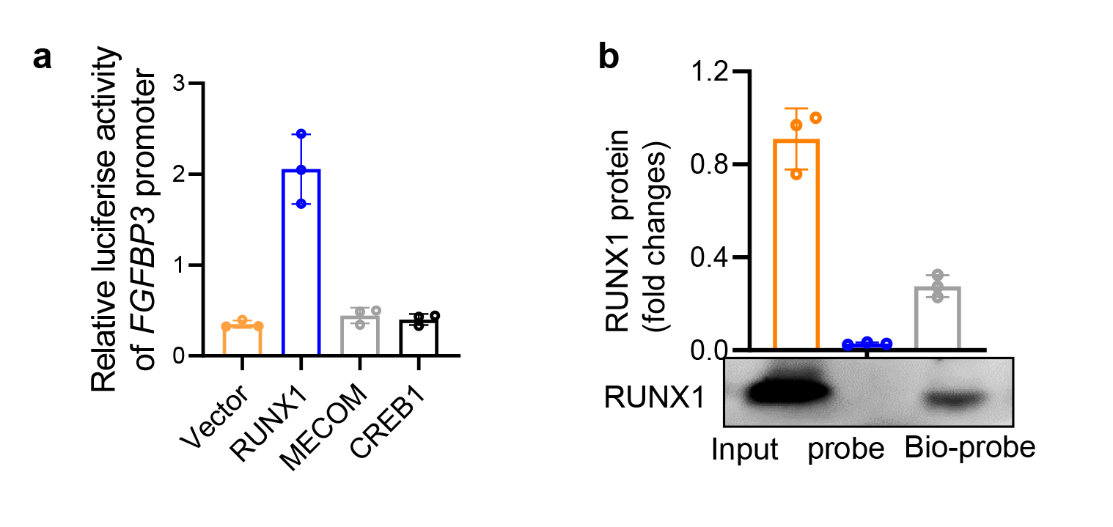


**Figure 18. Identification of the *FGFBP3* promoter site recognized and bound by RUNX1 protein. a)** Dual luciferase reporter assays were applied to detect the transcription factor within the FGFBP3 promoter region. **b**) RUNX1 protein levels pulled down by *FGFBP3* promoter was determined by immunoblot analysis.

**
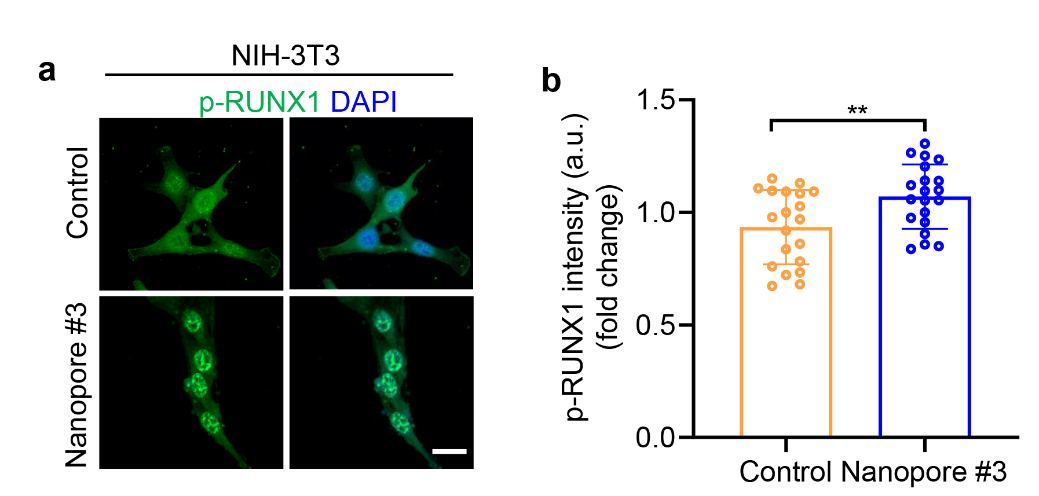
**

**Figure 19. Expression of p-RUNX1 protein in NIH-3T3 cells planted on plate or Nanopore 3# scaffold. a)** Immunofluorescence staining of p-RUNX1 in NIH-3T3 cells planted on plates or Nanopore 3# scaffold. Scale bars, 20 μm. **b**) Quantification of p-RUNX1 fluorescence intensity in (a). *n* = 3. Data are presented as mean ± SD, ***p* < 0.01.


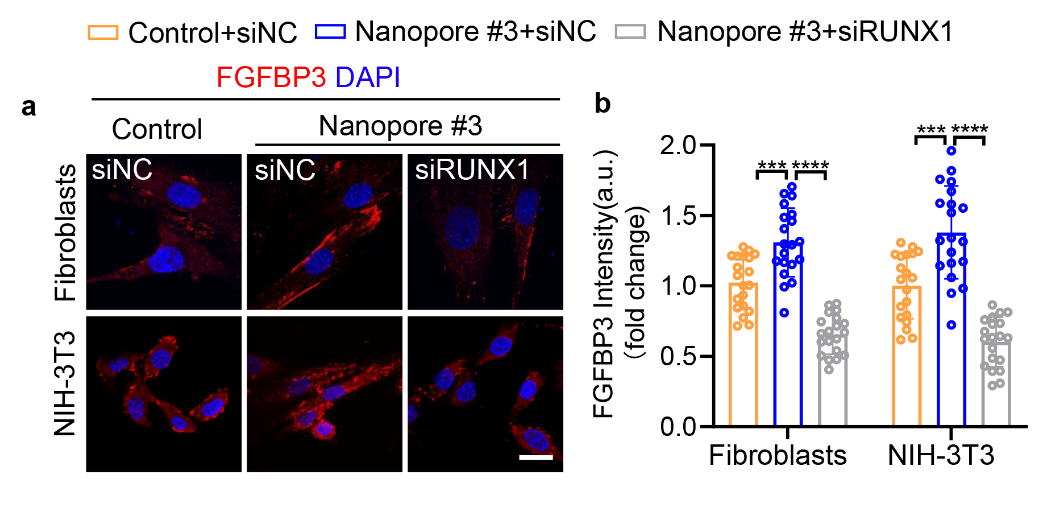


**Figure 20. Effect of RUNX1 knockdown primary fibroblasts or NIH-3T3 cells on the expression of FGFBP3 protein. a)** Immunofluorescence staining of FGFBP3 in fibroblasts or NIH-3T3 cells planted on plates or Nanopore 3# scaffold. Scale bars, 20 μm. **b**) Quantification of FGFBP3 fluorescence intensity in (a). *n* = 20. Data are presented as mean ± SD, ****p* < 0.001, *****p* < 0.0001.


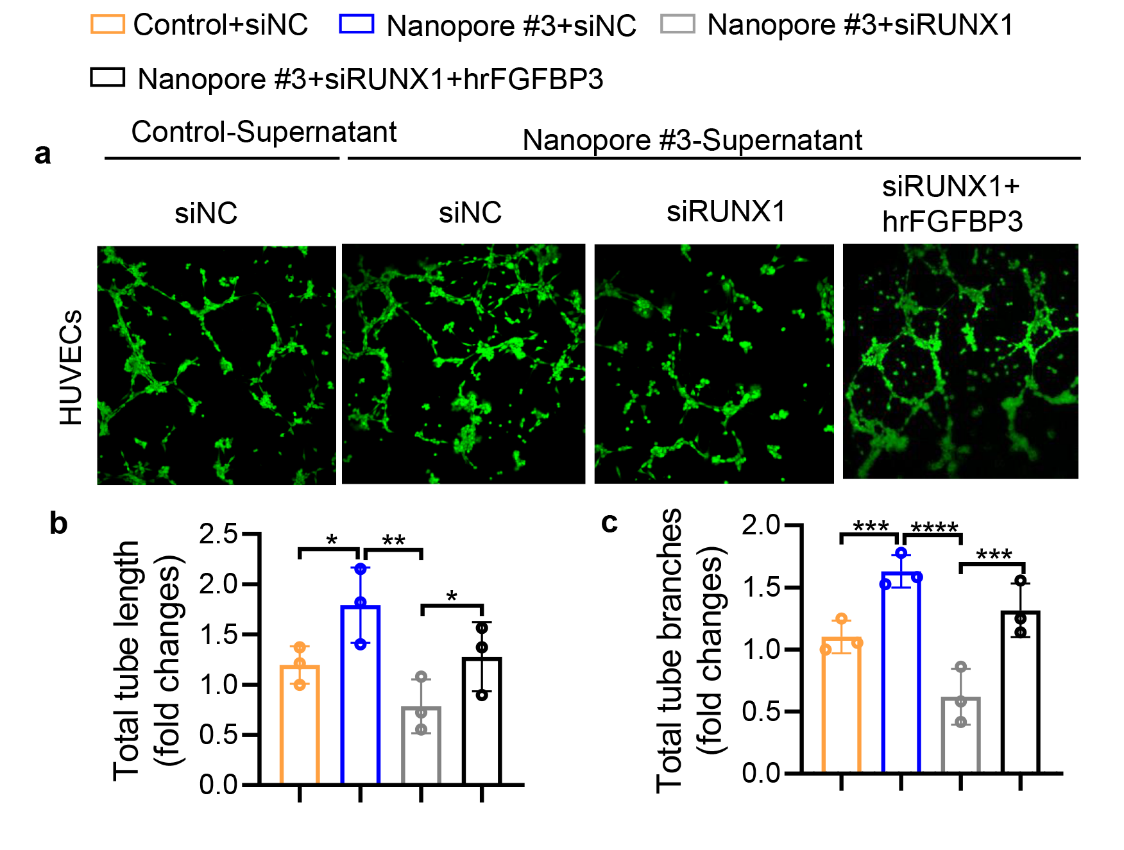


**Figure 21. Effect of adding recombinant FGFBP3 protein to the supernatant of RUNX1 knockdown cells on the angiogenesis of vascular endothelial cells.** Fluorescence images of HUVECs forming tubule-like structures with the supernatant of RUNX1 knockdown fibroblasts cultured on plates or Nanopore 3# scaffold. Scale bars, 200 μm. **b and c**) Quantification of total tube length and branches of various of groups. *n* = 20. Data are presented as mean ± SD, **p* < 0.05, ***p* < 0.01, ****p* < 0.001, *****p* < 0.0001.


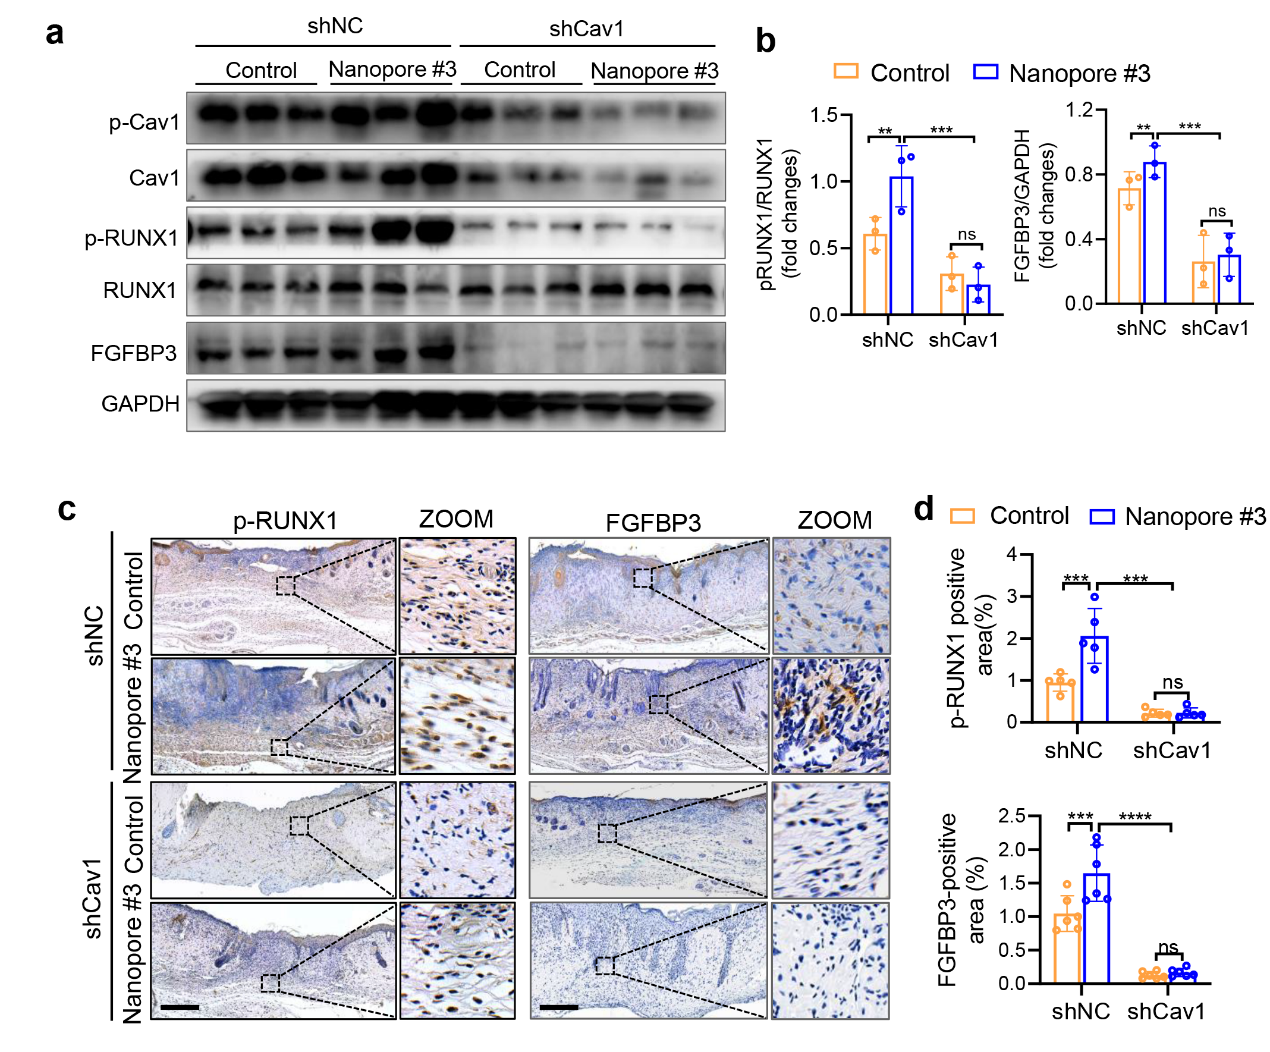


**Figure 22. Knockdown of AAV-Cav1 in skin fibroblasts of mice reduce the expression of p-RUNX1 and FGFBP3. a**) Cav1, p-Cav1, RUNX1, p-RUNX1 and FGFBP3 protein levels determined by immunoblot analysis. **b**) Quantification ofrelative proteins determined by Immunoblot in (a). **c**)Skin tissue p-RUNX1 and FGFBP3 contents were examined by immunohistochemical staining. Scale bars, 500 μm**. d**)Quantification analysis of p-RUNX1 and FGFBP3 positive area in (e). *n* = 5. Data are presented as mean ± SD, ***p* < 0.01, ****p* < 0.001, *****p* < 0.0001.


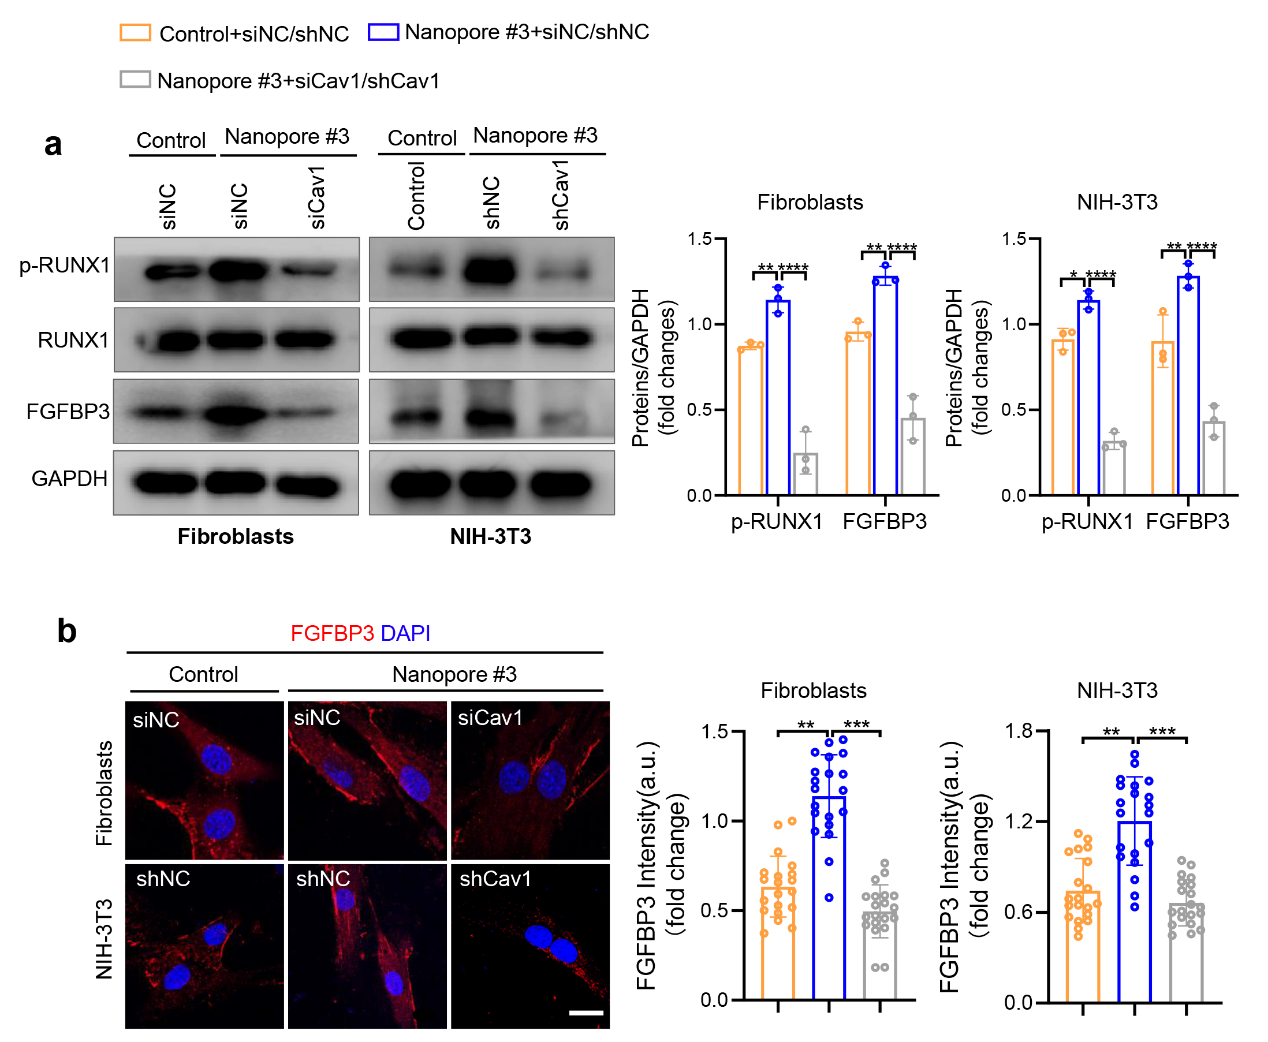


**Figure 23. Effect of Cav1 knockdown on FGFBP3 expression in fibroblasts. a**)Immunoblot analysis showed phosphorylated RUNX1 and FGFBP3 protein levels from whole cell lysates of primary fibroblasts and NIH3T3 cells cultured on plates or Nanopore 3# scaffold for 2 days. **b**) Immunofluorescence staining of FGFBP3 in primary fibroblasts and NIH3T3 cells planted on plates or Nanopore 3# scaffold. Scale bars, 20 μm. *n* = 3. Data are presented as mean ± SD, **p* < 0.05, ***p* < 0.01, ****p* < 0.001, *****p* < 0.0001.


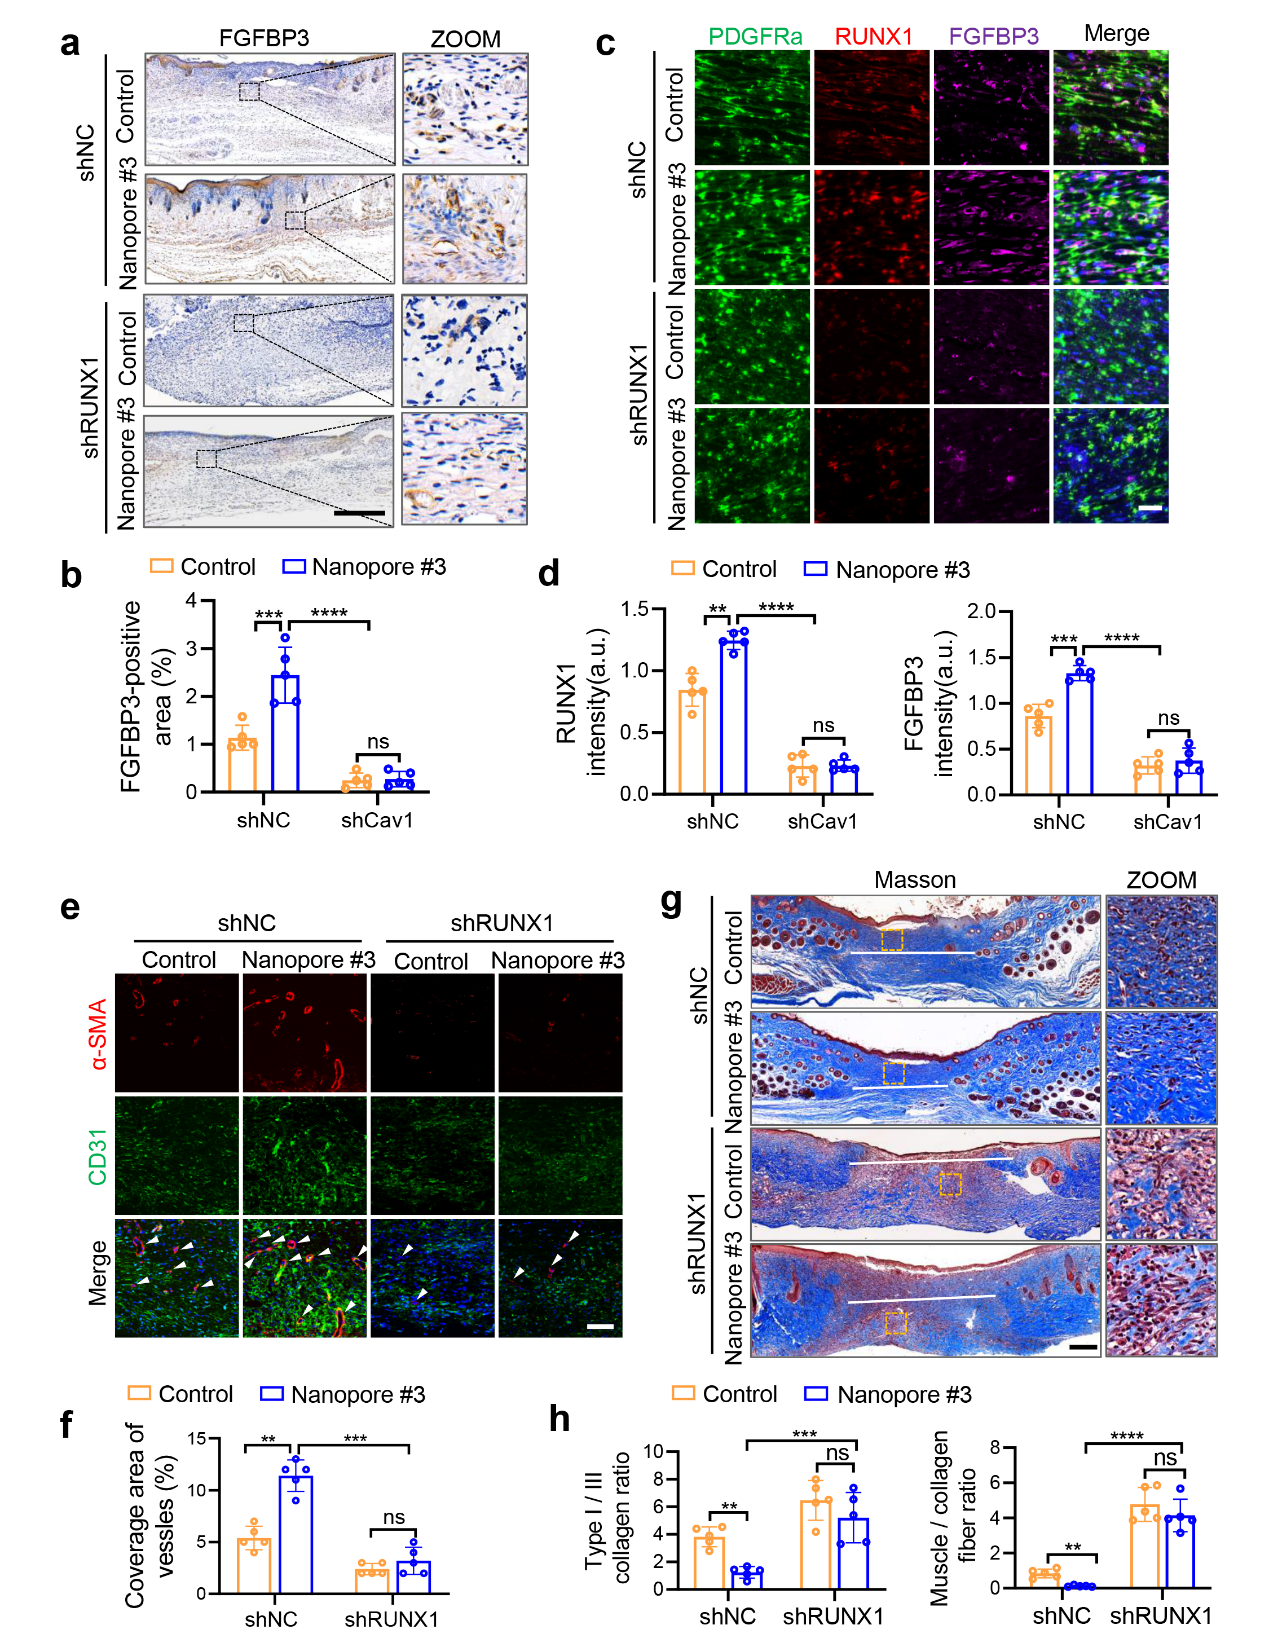


**Figure 24. Wound healing is disturbed by knockdown of AAV-RUNX1 in fibroblasts. a**) Skin tissue FGFBP3 contents examined by immunohistochemical staining. Scale bars, 100 mm. **b**) Quantification of the FGFBP3-positive area at the wound site. **c**) Immunofluorescence staining of PDGFRa (red), RUNX1 (green) and FGFBP3 (purple). Scale bars, 100 mm. **d**) Quantification of RUNX1 and FGFBP3 fluorescence intensity in (c). **e**) Immunofluorescence staining of α-SMA and CD31 for neovascularization in shNC or shRUNX1 groups, with the vessels indicated by white arrows. Scale bars, 2 mm. **f**) Quantification of the coverage area of vessels. **g**) Masson's trichrome staining of various groups after 14 days. Scale bars, 0.5 mm. **h**) Quantitative analysis of collagen volume fraction.*n* = 5. Data are presented as mean ± SD, ***p* < 0.01, ****p* < 0.001, *****p* < 0.0001.


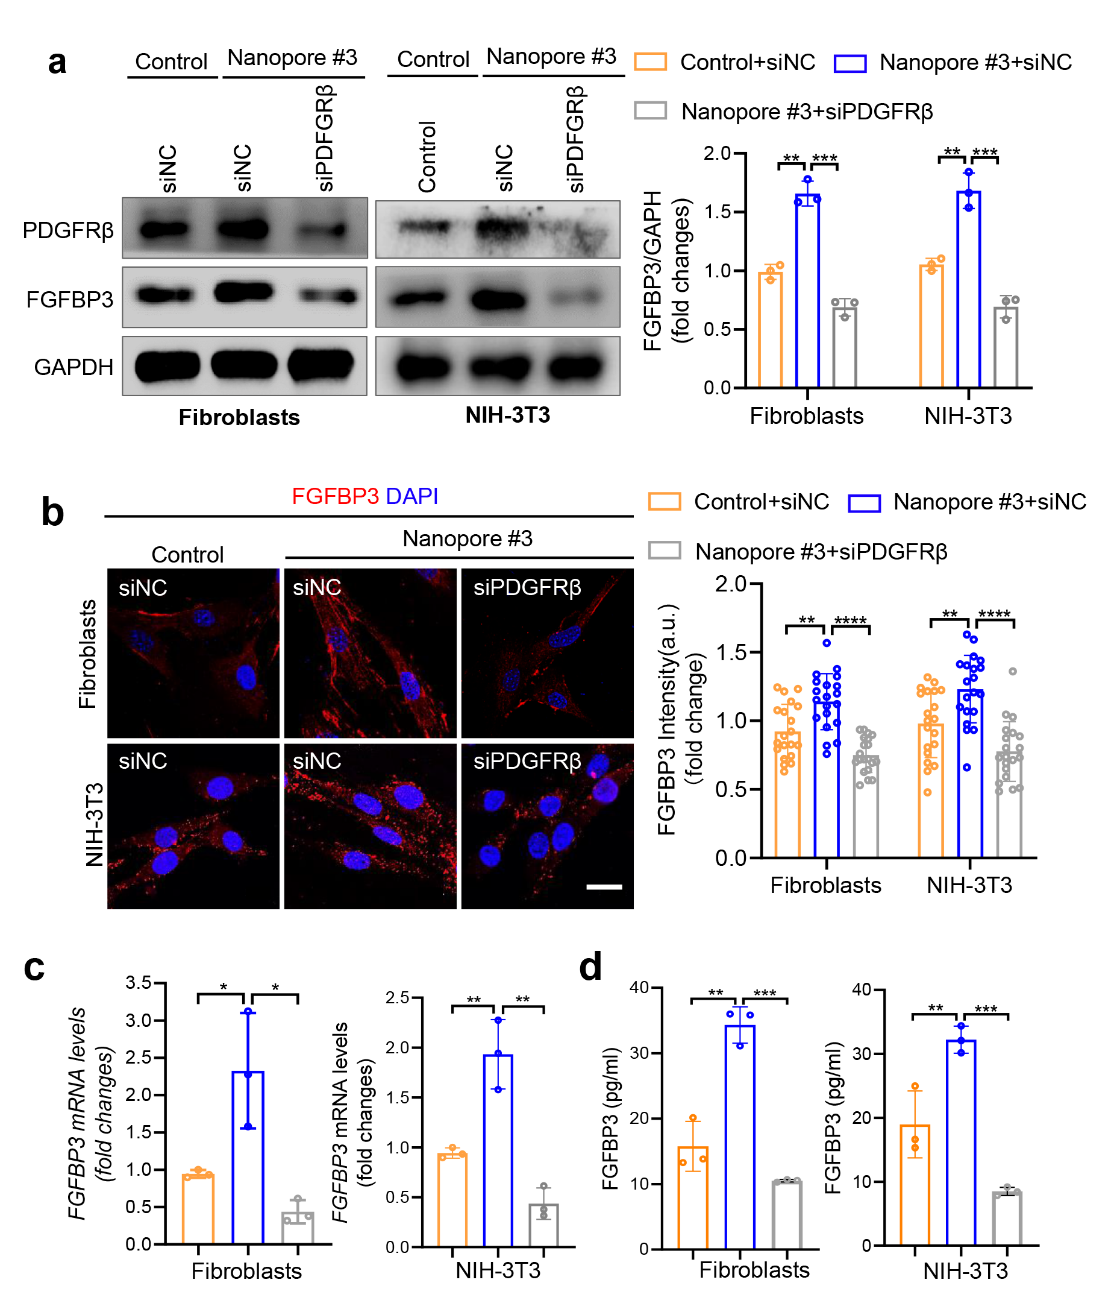


**Figure 25. PDGFRβ knockdown reduces the expression of FGFBP3 in fibroblasts cells. a**) FGFBP3 protein levels in primary fibroblasts and NIH3T3 cells examined by immunoblot analysis. **b** Immunofluorescence staining of FGFBP3 in fibroblasts or NIH3T3 cells planted on plates or Nanopore 3# scaffold. Scale bars, 100 μm. *n* = 20. **c**) *FGFBP3* mRNA levels in primary fibroblasts and NIH3T3 cells. **d**) Secretion of FGFBP3 protein levels in the supernatant of PDGFRβ knockdown fibroblasts planted on plates or Nanopore 3# scaffold was examined by ELISA assays. *n* = 3. Data are presented as mean ± SD, **p* < 0.05, ***p* < 0.01, ****p* < 0.001, *****p* < 0.0001.


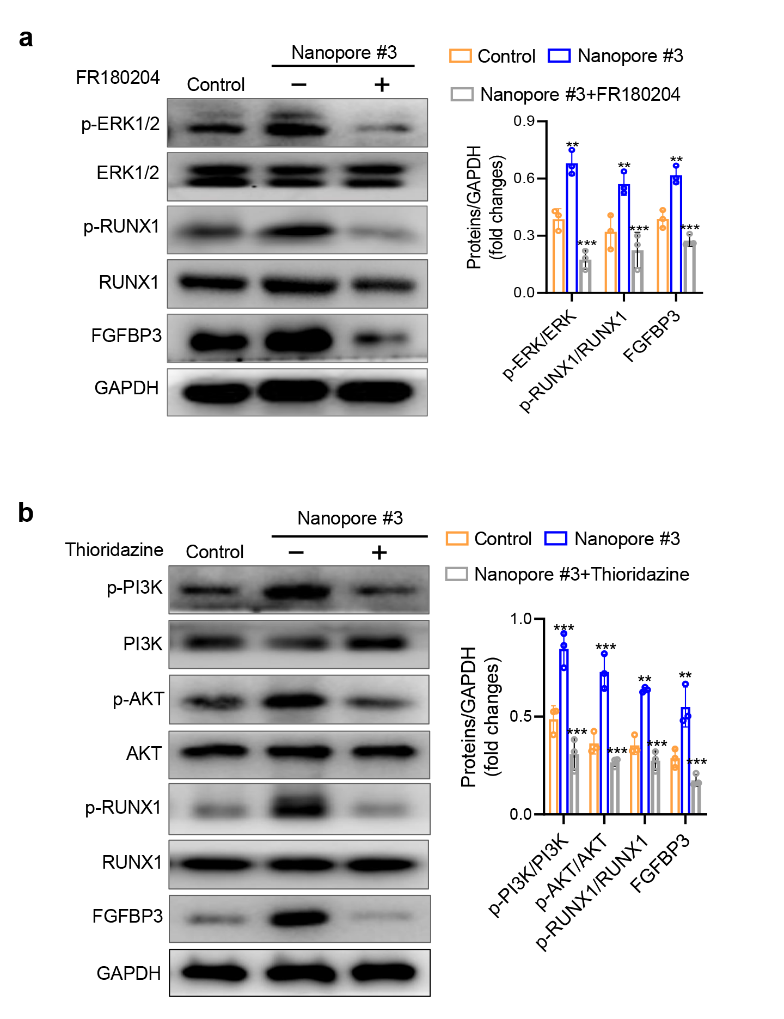


**Figure 26.** **Inhibition of ERK and PI3K-AKT signaling pathways impacts FGFBP3 expression in fibroblasts cultured on** **Nanopore 3# scaffold. a)** ERK, p-ERK,RUNX1, p-RUNX1 and FGFBP3 protein levels in primary fibroblasts with the treatment of ERK signaling inhibitor. **b**)PI3K, p-PI3K, AKT, p-AKT,RUNX1, p-RUNX1 and FGFBP3 protein levels in primary fibroblasts with the treatment of PI3K signaling inhibitor. *n* = 3. Data are presented as mean ± SD, ***p* < 0.01, ****p* < 0.001, *****p* < 0.0001.


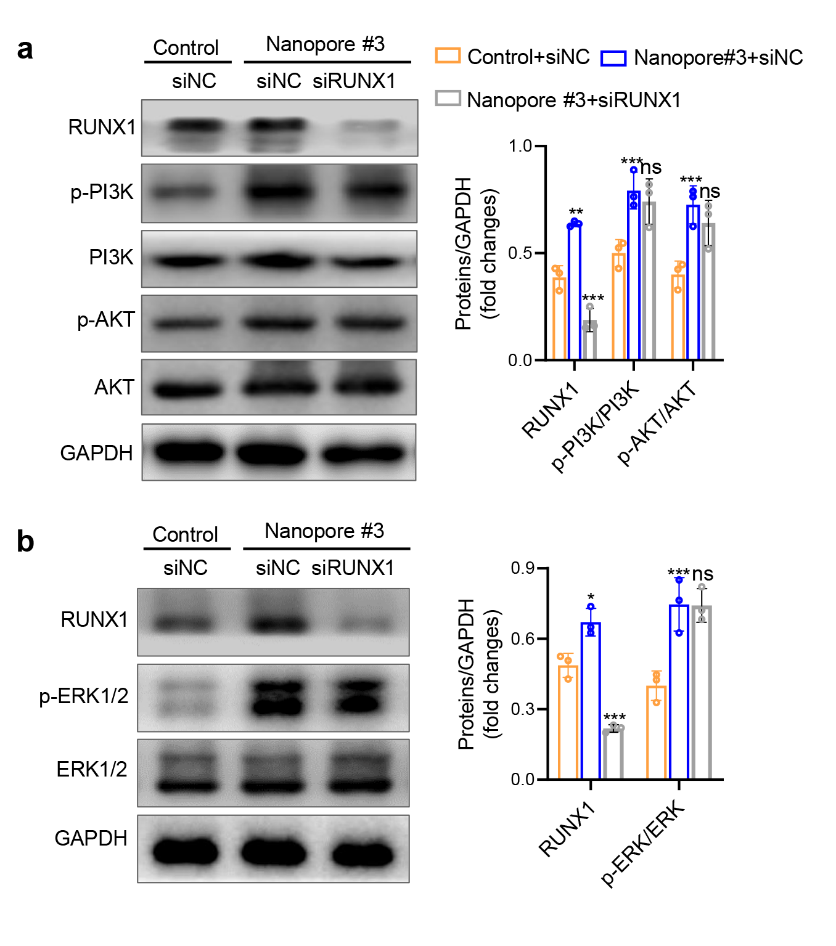


**Figure 27.** **Effect of RUNX1 knockdown in fibroblasts on the ERK and PI3K-AKT signaling pathway. a**)RUNX1, p-PI3K, PI3K, p-AKT and AKT protein levels in primary fibroblasts with RUNX1 knockdown. **b**)RUNX1, p-ERK and ERK protein levels in primary fibroblasts with RUNX1 knockdown. *n* = 3. *n* = 3. Data are presented as mean ± SD, **p* < 0.05, ***p* < 0.01, ****p* < 0.001, *****p* < 0.0001.


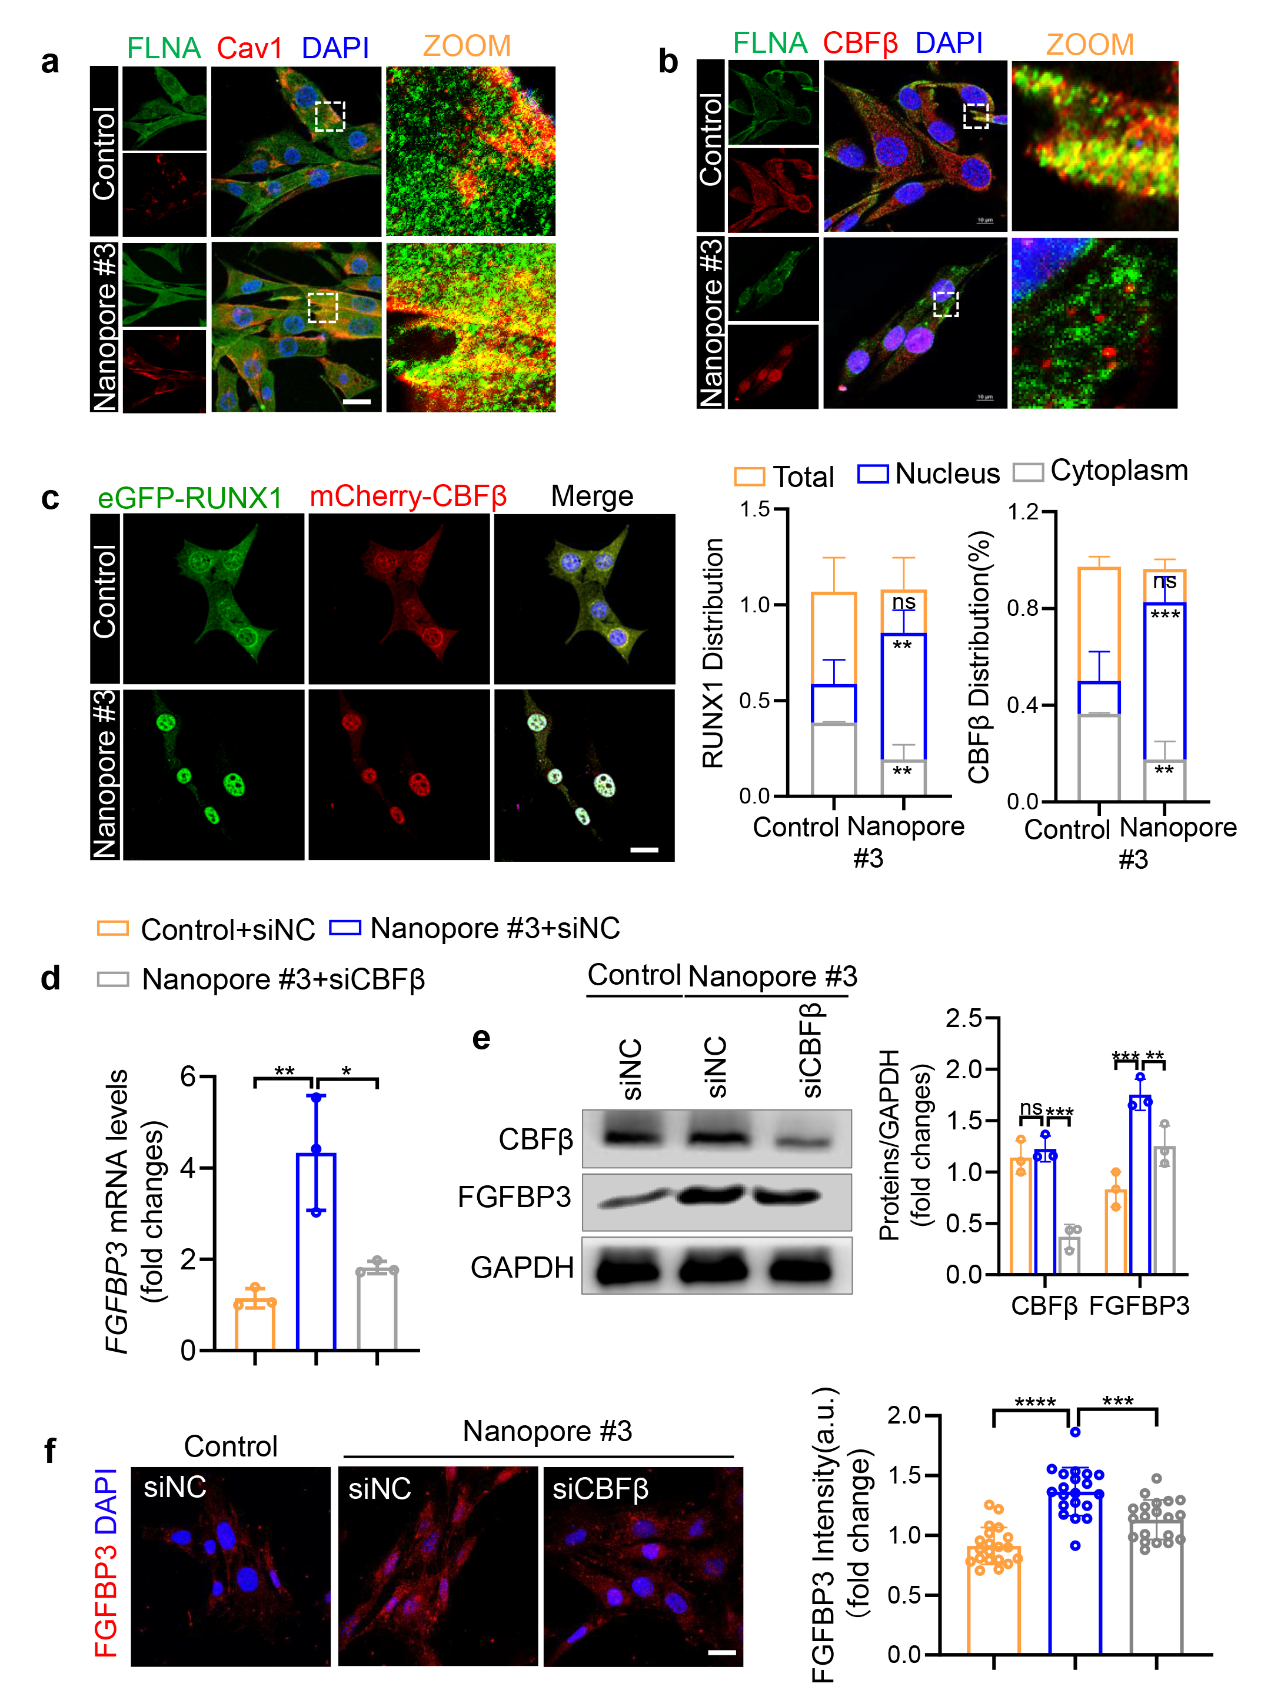


**Figure 28. Nanopore-mediated Cav1 recruitment of FLNA and CBFβ nuclear translocation enhance RUNX1-dependent FGFBP3 transcription in NIH-3T3 cells. a**) Confocal images of Cav1 (red) and FLNA (green) localization in the NIH3T3 cells. Scale bars, 20 μm. **b**) Confocal images of CBFβ (red) and FLNA (green) localization in the NIH3T3 cells. Scale bars, 20 μm. **c**) Confocal images of exogenous eGFP-RUNX1 (green) and mCherry-CBFβ (red) in NIH3T3 cells, and positioning analysis of eGFP-RUNX1 and mCherry-CBFβ in NIH3T3 cells. Scale bars, 20 μm. **d and e**) *FGFBP3* mRNA and its protein levels in NIH3T3 cells with CBFβ knockdown. **f**) Immunofluorescence staining of FGFBP3 in NIH3T3 cells with CBFβ knockdown. Scale bars, 20 μm. *n* = 3. Data are presented as mean ± SD, ***p* < 0.01, ****p* < 0.001, *****p* < 0.0001.


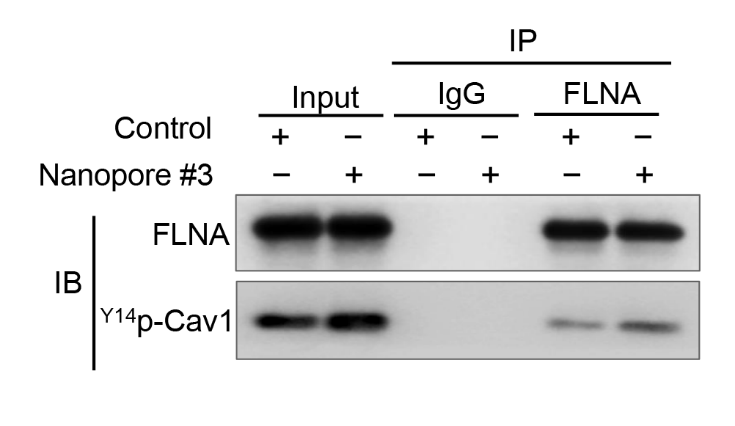


**Figure 29.** **The combination of FLNA and Y14p-Cav1 in fibroblasts planted on plates or Nanopore 3# scaffold.** The cell lysates were subjected to immunoprecipitation with FLNA antibody, followed by immunoblotting with Y14p-Cav1 antibody. Cell lysates were also subjected to immunoprecipitation with IgG as negative control.
